# Supplementary material for: Single-Cell RNA-Seq Analysis Reveals Lung Epithelial Cell Type-Specific Responses to HDM and Regulation by Tet1
Source: MDPI journal article supplement (doi:10.3390/genes13050880), 2022-05-14
Supplement: s1 [file s1]

**Supplementary Table S2. Cell number in each group identified by scRNA-seq analysis**

|                             | <b>WT-Sal</b>     | <b>WT-HDM</b>     | <b>KO-Sal</b>     | <b>KO-HDM</b>     | <b>Total</b>       |
|-----------------------------|-------------------|-------------------|-------------------|-------------------|--------------------|
| EpCAM <sup>+</sup> cells    | 6378              | 6925              | 5420              | 6714              | 25437              |
| AT1 cells                   | 18<br>(0.282%)    | 5<br>(0.072%)     | 9<br>(0.166%)     | 8<br>(0.119%)     | 40<br>(0.157%)     |
| AT2 cells                   | 5502<br>(86.265%) | 3885<br>(56.101%) | 4572<br>(84.354%) | 3770<br>(56.151%) | 17729<br>(69.698%) |
| Alveolar progenitor cells   | 157<br>(2.462%)   | 1758<br>(25.386%) | 84<br>(1.550%)    | 1905<br>(28.374%) | 3904<br>(15.348%)  |
| Broncho alveolar stem cells | 55<br>(0.862%)    | 985<br>(14.224%)  | 62<br>(1.144%)    | 671<br>(9.994%)   | 1773<br>(6.970%)   |
| Ciliated cells              | 362<br>(5.676%)   | 66<br>(0.953%)    | 189<br>(3.487%)   | 131<br>(1.951%)   | 748<br>(2.941%)    |
| Stromal cells               | 105<br>(1.646%)   | 88<br>(1.271%)    | 354<br>(6.531%)   | 38<br>(0.566%)    | 585<br>(2.300%)    |
| Club cells                  | 95<br>(1.489%)    | 75<br>(1.083%)    | 115<br>(2.122%)   | 139<br>(2.070%)   | 424<br>(1.667%)    |
| Goblet cells                | 5<br>(0.078%)     | 56<br>(0.809%)    | 20<br>(0.369%)    | 45<br>(0.670%)    | 126<br>(0.495%)    |
| Neuroendocrine cells        | 79<br>(1.239%)    | 7<br>(0.101%)     | 15<br>(0.277%)    | 7<br>(0.104%)     | 108<br>(0.425%)    |
