# Supplementary material for: Single-Cell RNA-Seq Analysis Reveals Lung Epithelial Cell Type-Specific Responses to HDM and Regulation by Tet1
Source: Genes (Basel). 2022 May 14;13(5):880. doi: 10.3390/genes13050880 (PMC9140484; doi:10.3390/genes13050880)
Supplement: Supplementary file 1 [file genes-13-00880-s001.zip]

Archive with 19 entries (19 files):
- genes-1690792-supplementary.xlsx
- Supplementary Figure S1.jpg
- Supplementary Figure S2_R1.pdf
- Supplementary Figure S3.jpg
- Supplementary Figure S4.jpg
- Supplementary Figure S5.pdf
- Supplementary Figure S6-1.jpg
- Supplementary Information-2022-05-05.pdf
- Supplementary Table S1-Markers used to define all the cell types.xlsx
- Supplementary Table S10-Enriched pathways within genes with DEGs among 3 comparisons.xlsx
- Supplementary Table S11-Enriched pathways within DEGs in KO-HDMvsWT-HDM.xlsx
- Supplementary Table S2-Cell number in each group identified by scRNA-seq analysis.pdf
- Supplementary Table S3-updated_all_cells_comparisons_DE_genes_12-11-2020.xlsx
- Supplementary Table S4-all_cells_comparisons_IPA.xlsx
- Supplementary Table S5-mouse_scRNAseq_differentially_expressed_genes_individual_cell_types.xlsx
- Supplementary Table S6-Examples of cell type specific changes-2021-10-05.xlsx
- Supplementary Table S7-AT2_cells_comparisons_IPA-2021-10-05.xlsx
- Supplementary Table S8-ciliated_cells_comparisons_IPA-2021-10-05.xlsx
- Supplementary Table S9-3 comparisons with same direction.xlsx
