# Supplementary material for: Single-Cell RNA-Seq Analysis Reveals Lung Epithelial Cell Type-Specific Responses to HDM and Regulation by Tet1
Source: Genes (Basel). 2022 May 14;13(5):880. doi: 10.3390/genes13050880 (PMC9140484; doi:10.3390/genes13050880)
Supplement: Supplementary file 1 [file genes-13-00880-s001.zip › genes-1690792-supplementary.xlsx]

## Sheet: Sheet1
	WT-Sal	WT-HDM	KO-Sal	KO-HDM	Total
EpCAM+ cells	6378	6925	5420	6714	25437
AT1 cells	18 (0.28%)	5 (0.07%)	9 (0.17%)	8 (0.12%)	40 (0.16%)
AT2 cells	5502 (86.27%)	3885 (56.10%)	4572 (84.35%)	3770 (56.15%)	17729 (69.70%)
Alveolar progenitor cells	157 (2.46%)	1758 (25.39%)	84 (1.55%)	1905 (28.37%)	3904 (15.35%)
Broncho alveolar stem cells	55 (0.86%)	985 (14.22%)	62 (1.14%)	671 (9.99%)	1773 (6.97%)
Ciliated cells	362 (5.68%)	66 (0.95%)	189 (3.49%)	131 (1.95%)	748 (2.94%)
Stromal cells	105 (1.65%)	88 (1.27%)	354 (6.53%)	38 (0.57%)	585 (2.30%)
Club cells	95 (1.49%)	75 (1.08%)	115 (2.12%)	139 (2.07%)	424 (1.67%)
Goblet cells	5 (0.08%)	56 (0.81%)	20 (0.37%)	45 (0.67%)	126 (0.50%)
Neuroendocrine cells	79 (1.24%)	7 (0.10%)	15 (0.28%)	7 (0.10%)	108 (0.43%)
