# Supplementary material for: Single-Cell RNA-Seq Analysis Reveals Lung Epithelial Cell Type-Specific Responses to HDM and Regulation by Tet1
Source: Genes (Basel). 2022 May 14;13(5):880. doi: 10.3390/genes13050880 (PMC9140484; doi:10.3390/genes13050880)
Supplement: Supplementary file 1 [file genes-13-00880-s001.zip › Supplementary Table S3-updated_all_cells_comparisons_DE_genes_12-11-2020.xlsx]

## Sheet: WT HDM vs WT Saline updated
Gene	avg_logFC	p_val	pct.1	pct.2	p_val_adj	mean.WT.HDM	mean.WT.Saline	Gene.description
Retnla	6.50237	0	1	0.117	0	6.81035	0.157113	resistin like alpha [Source:MGI Symbol;Acc:MGI:1888504]
Chia1	2.32071	0	0.992	0.501	0	3.29643	0.825538	chitinase, acidic 1 [Source:MGI Symbol;Acc:MGI:1932052]
B2m	2.03568	0	1	0.835	0	3.98039	1.61746	beta-2 microglobulin [Source:MGI Symbol;Acc:MGI:88127]
Fxyd4	2.03114	0	0.858	0.014	0	1.6294	0.0169124	FXYD domain-containing ion transport regulator 4 [Source:MGI Symbol;Acc:MGI:1889005]
Ifi27l2a	1.98838	0	0.883	0.09	0	1.85791	0.140068	interferon, alpha-inducible protein 27 like 2A [Source:MGI Symbol;Acc:MGI:1924183]
Il33	1.56748	0	0.951	0.446	0	2.23731	0.620338	interleukin 33 [Source:MGI Symbol;Acc:MGI:1924375]
Slc26a4	1.53537	0	0.857	0.018	0	1.34416	0.0196442	solute carrier family 26, member 4 [Source:MGI Symbol;Acc:MGI:1346029]
Ly6i	1.53212	0	0.813	0.096	0	1.44194	0.130314	lymphocyte antigen 6 complex, locus I [Source:MGI Symbol;Acc:MGI:1888480]
Lcn2	1.47578	0	0.997	0.858	0	3.59565	1.86692	lipocalin 2 [Source:MGI Symbol;Acc:MGI:96757]
H2-Q7	1.31649	0	0.817	0.085	0	1.29073	0.109846	histocompatibility 2, Q region locus 7 [Source:MGI Symbol;Acc:MGI:95936]
H2-K1	1.30028	0	0.998	0.79	0	2.94908	1.40509	histocompatibility 2, K1, K region [Source:MGI Symbol;Acc:MGI:95904]
Tmem213	1.25164	0	0.744	0.053	0	1.07739	0.0622847	transmembrane protein 213 [Source:MGI Symbol;Acc:MGI:1924772]
Ccl20	1.23167	0	0.23	0.009	0	0.344301	0.0128422	chemokine (C-C motif) ligand 20 [Source:MGI Symbol;Acc:MGI:1329031]
H2afz	1.22195	0	0.969	0.741	0	2.27485	1.17893	H2A histone family, member Z [Source:MGI Symbol;Acc:MGI:1888388]
Pglyrp1	1.18354	0	0.56	0.043	0	0.776087	0.0489663	peptidoglycan recognition protein 1 [Source:MGI Symbol;Acc:MGI:1345092]
H2-D1	1.16934	0	0.998	0.85	0	2.90278	1.56194	histocompatibility 2, D region locus 1 [Source:MGI Symbol;Acc:MGI:95896]
Prdx4	1.16888	0	0.86	0.275	0	1.45116	0.328401	peroxiredoxin 4 [Source:MGI Symbol;Acc:MGI:1859815]
Car2	1.12541	0	0.828	0.248	0	1.3286	0.296995	carbonic anhydrase 2 [Source:MGI Symbol;Acc:MGI:88269]
Slpi	1.11091	0	0.869	0.352	0	1.57072	0.484126	secretory leukocyte peptidase inhibitor [Source:MGI Symbol;Acc:MGI:109297]
Chil1	0.956642	0	0.998	0.953	0	3.88922	2.8201	chitinase-like 1 [Source:MGI Symbol;Acc:MGI:1340899]
Chil4	0.931324	5.44243e-268	0.175	0	1.02878e-263	0.193219	0	chitinase-like 4 [Source:MGI Symbol;Acc:MGI:1341098]
C3	0.920813	0	0.788	0.246	0	1.12814	0.301364	complement component 3 [Source:MGI Symbol;Acc:MGI:88227]
Gclc	0.878416	0	0.953	0.618	0	1.99713	0.970749	glutamate-cysteine ligase, catalytic subunit [Source:MGI Symbol;Acc:MGI:104990]
Tmem176a	0.843898	0	0.935	0.579	0	1.77818	0.82801	transmembrane protein 176A [Source:MGI Symbol;Acc:MGI:1913308]
Serpinb6b	0.843241	0	0.772	0.304	0	1.14284	0.372905	serine (or cysteine) peptidase inhibitor, clade B, member 6b [Source:MGI Symbol;Acc:MGI:894688]
Ifitm3	0.842055	0	0.752	0.163	0	1.18352	0.267077	interferon induced transmembrane protein 3 [Source:MGI Symbol;Acc:MGI:1913391]
Gapdh	0.835374	0	0.975	0.733	0	2.15542	1.17945	glyceraldehyde-3-phosphate dehydrogenase [Source:MGI Symbol;Acc:MGI:95640]
Wbp5	0.802416	0	0.991	0.906	0	2.73412	1.8484	NA
Cyba	0.801021	0	0.913	0.594	0	1.66056	0.8402	cytochrome b-245, alpha polypeptide [Source:MGI Symbol;Acc:MGI:1316658]
Lrg1	0.799042	0	0.898	0.472	0	1.82803	0.807903	leucine-rich alpha-2-glycoprotein 1 [Source:MGI Symbol;Acc:MGI:1924155]
Psmb8	0.796253	0	0.756	0.23	0	1.03457	0.277451	proteasome (prosome, macropain) subunit, beta type 8 (large multifunctional peptidase 7) [Source:MGI Symbol;Acc:MGI:1346527]
Bst2	0.789268	0	0.687	0.155	0	0.888962	0.188701	bone marrow stromal cell antigen 2 [Source:MGI Symbol;Acc:MGI:1916800]
Tnfrsf9	0.767502	0	0.517	0.009	0	0.576979	0.00915246	tumor necrosis factor receptor superfamily, member 9 [Source:MGI Symbol;Acc:MGI:1101059]
Atp5f1	0.743174	0	0.95	0.653	0	1.80789	0.949298	ATP synthase, H+ transporting, mitochondrial F0 complex, subunit B1 [Source:MGI Symbol;Acc:MGI:1100495]
Ptgs1	0.738477	0	0.734	0.206	0	0.940236	0.243631	prostaglandin-endoperoxide synthase 1 [Source:MGI Symbol;Acc:MGI:97797]
Dmkn	0.736769	0	0.789	0.339	0	1.32433	0.525647	dermokine [Source:MGI Symbol;Acc:MGI:1920962]
Ube2c	0.729936	0	0.233	0.014	0	0.334736	0.0233219	ubiquitin-conjugating enzyme E2C [Source:MGI Symbol;Acc:MGI:1915862]
Ly6a	0.718278	0	0.516	0.097	0	0.660628	0.123217	lymphocyte antigen 6 complex, locus A [Source:MGI Symbol;Acc:MGI:107527]
Hmgb2	0.716214	5.52117e-209	0.616	0.341	1.04367e-204	0.90178	0.431711	high mobility group box 2 [Source:MGI Symbol;Acc:MGI:96157]
Sftpd	0.711503	0	0.998	0.973	0	4.21107	3.39129	surfactant associated protein D [Source:MGI Symbol;Acc:MGI:109515]
Hmgn2	0.699569	0	0.586	0.226	0	0.808276	0.277802	high mobility group nucleosomal binding domain 2 [Source:MGI Symbol;Acc:MGI:96136]
S100a11	0.697362	0	0.998	0.956	0	3.09603	2.26082	S100 calcium binding protein A11 [Source:MGI Symbol;Acc:MGI:1338798]
Dynlrb1	0.674415	0	0.957	0.704	0	1.81769	1.05528	dynein light chain roadblock-type 1 [Source:MGI Symbol;Acc:MGI:1914318]
Tubb5	0.673097	3.8014e-197	0.537	0.271	7.18579e-193	0.763813	0.339402	tubulin, beta 5 class I [Source:MGI Symbol;Acc:MGI:107812]
Ifi27	0.671712	0	0.874	0.468	0	1.39937	0.640745	interferon, alpha-inducible protein 27 [Source:MGI Symbol;Acc:MGI:1277180]
Psme2	0.661384	0	0.827	0.406	0	1.21056	0.51875	proteasome (prosome, macropain) activator subunit 2 (PA28 beta) [Source:MGI Symbol;Acc:MGI:1096365]
Manf	0.647471	0	0.851	0.504	0	1.38638	0.702678	mesencephalic astrocyte-derived neurotrophic factor [Source:MGI Symbol;Acc:MGI:1922090]
Ly6e	0.628581	0	0.992	0.895	0	2.64495	1.85301	lymphocyte antigen 6 complex, locus E [Source:MGI Symbol;Acc:MGI:106651]
Npc2	0.624233	0	1	0.994	0	4.38553	3.69972	NPC intracellular cholesterol transporter 2 [Source:MGI Symbol;Acc:MGI:1915213]
Cks2	0.622958	0	0.309	0.047	0	0.405117	0.0608701	CDC28 protein kinase regulatory subunit 2 [Source:MGI Symbol;Acc:MGI:1913447]
Ctsz	0.622431	0	0.862	0.505	0	1.33061	0.669102	cathepsin Z [Source:MGI Symbol;Acc:MGI:1891190]
Pfn1	0.619792	0	0.86	0.477	0	1.29947	0.625256	profilin 1 [Source:MGI Symbol;Acc:MGI:97549]
Cycs	0.61796	0	0.871	0.471	0	1.30955	0.617634	cytochrome c, somatic [Source:MGI Symbol;Acc:MGI:88578]
Cd14	0.615552	0	0.47	0.072	0	0.530919	0.0796132	CD14 antigen [Source:MGI Symbol;Acc:MGI:88318]
Tmem176b	0.613199	0	0.95	0.704	0	1.8412	1.10846	transmembrane protein 176B [Source:MGI Symbol;Acc:MGI:1916348]
Cox5a	0.607887	0	0.949	0.678	0	1.73132	0.998995	cytochrome c oxidase subunit 5A [Source:MGI Symbol;Acc:MGI:88474]
Stmn1	0.607028	2.95636e-42	0.755	0.632	5.58841e-38	1.29771	0.957983	stathmin 1 [Source:MGI Symbol;Acc:MGI:96739]
2200002D01Rik	0.60173	0	0.507	0.125	0	0.600802	0.151733	RIKEN cDNA 2200002D01 gene [Source:MGI Symbol;Acc:MGI:1919525]
Cks1b	0.592935	0	0.347	0.056	0	0.434417	0.0668009	CDC28 protein kinase 1b [Source:MGI Symbol;Acc:MGI:1889208]
Psmb9	0.57264	0	0.511	0.094	0	0.561438	0.106372	proteasome (prosome, macropain) subunit, beta type 9 (large multifunctional peptidase 2) [Source:MGI Symbol;Acc:MGI:1346526]
Clu	0.569888	8.23665e-243	0.726	0.427	1.55697e-238	1.07222	0.584444	clusterin [Source:MGI Symbol;Acc:MGI:88423]
Cox7a2	0.5639	0	0.992	0.917	0	2.42293	1.77412	cytochrome c oxidase subunit 7A2 [Source:MGI Symbol;Acc:MGI:1316715]
Tma7	0.562667	0	0.947	0.677	0	1.67319	1.0011	translational machinery associated 7 [Source:MGI Symbol;Acc:MGI:1913417]
Birc5	0.562206	0	0.244	0.01	0	0.320381	0.0150602	baculoviral IAP repeat-containing 5 [Source:MGI Symbol;Acc:MGI:1203517]
Cystm1	0.561117	0	0.964	0.745	0	1.88119	1.18857	cysteine-rich transmembrane module containing 1 [Source:MGI Symbol;Acc:MGI:1913310]
Rbm3	0.559303	0	0.865	0.543	0	1.35214	0.739491	RNA binding motif (RNP1, RRM) protein 3 [Source:MGI Symbol;Acc:MGI:1099460]
Mif	0.554674	0	0.9	0.586	0	1.4517	0.818745	macrophage migration inhibitory factor (glycosylation-inhibiting factor) [Source:MGI Symbol;Acc:MGI:96982]
Sod2	0.552271	0	0.812	0.431	0	1.15526	0.564917	superoxide dismutase 2, mitochondrial [Source:MGI Symbol;Acc:MGI:98352]
2810417H13Rik	0.55125	3.61595e-259	0.183	0.005	6.83522e-255	0.260402	0.00612584	NA
H2-Q6	0.551128	0	0.462	0.053	0	0.481348	0.0588159	histocompatibility 2, Q region locus 6 [Source:MGI Symbol;Acc:MGI:95935]
Bcap29	0.550678	0	0.538	0.095	0	0.562555	0.105081	B cell receptor associated protein 29 [Source:MGI Symbol;Acc:MGI:101917]
Cstb	0.548333	0	0.942	0.677	0	1.65892	1.00765	cystatin B [Source:MGI Symbol;Acc:MGI:109514]
Hist1h2ap	0.544167	1.31016e-167	0.132	0.008	2.47659e-163	0.210781	0.0112212	histone cluster 1, H2ap [Source:MGI Symbol;Acc:MGI:3710573]
Tspan8	0.539578	0	0.648	0.242	0	0.796846	0.292971	tetraspanin 8 [Source:MGI Symbol;Acc:MGI:2384918]
Uqcrq	0.528818	0	0.977	0.787	0	1.93567	1.27698	ubiquinol-cytochrome c reductase, complex III subunit VII [Source:MGI Symbol;Acc:MGI:107807]
Cox5b	0.525276	0	0.974	0.778	0	1.90092	1.24851	cytochrome c oxidase subunit 5B [Source:MGI Symbol;Acc:MGI:88475]
Nme1	0.521913	0	0.742	0.318	0	0.927035	0.387582	NME/NM23 nucleoside diphosphate kinase 1 [Source:MGI Symbol;Acc:MGI:97355]
Timm10b	0.521557	0	0.814	0.434	0	1.11078	0.548088	translocase of inner mitochondrial membrane 10B [Source:MGI Symbol;Acc:MGI:1315196]
Taf10	0.519982	0	0.716	0.299	0	0.877045	0.356789	TATA-box binding protein associated factor 10 [Source:MGI Symbol;Acc:MGI:1346320]
Lockd	0.513306	0	0.241	0.017	0	0.313494	0.0242197	lncRNA downstream of Cdkn1b [Source:MGI Symbol;Acc:MGI:1915081]
Sec11c	0.508783	0	0.785	0.401	0	1.05344	0.508062	SEC11 homolog C, signal peptidase complex subunit [Source:MGI Symbol;Acc:MGI:1913536]
Ctsc	0.508325	0	0.944	0.771	0	1.94102	1.3423	cathepsin C [Source:MGI Symbol;Acc:MGI:109553]
Myl6	0.507437	0	0.998	0.958	0	2.73163	2.13408	myosin, light polypeptide 6, alkali, smooth muscle and non-muscle [Source:MGI Symbol;Acc:MGI:109318]
Rnaset2a	0.506583	0	0.861	0.527	0	1.28025	0.700117	ribonuclease T2A [Source:MGI Symbol;Acc:MGI:1915445]
Itm2a	0.506296	0	0.343	0.029	0	0.371448	0.0316841	integral membrane protein 2A [Source:MGI Symbol;Acc:MGI:107706]
Snhg18	0.501263	0	0.62	0.261	0	0.772169	0.321554	small nucleolar RNA host gene 18 [Source:MGI Symbol;Acc:MGI:1914085]
Cd63	0.496124	0	0.988	0.915	0	2.44961	1.86689	CD63 antigen [Source:MGI Symbol;Acc:MGI:99529]
Atp5o	0.496056	0	0.928	0.67	0	1.57659	0.974424	ATP synthase, H+ transporting, mitochondrial F1 complex, O subunit [Source:MGI Symbol;Acc:MGI:106341]
Serpinb9	0.486094	0	0.52	0.184	0	0.60509	0.218593	serine (or cysteine) peptidase inhibitor, clade B, member 9 [Source:MGI Symbol;Acc:MGI:106603]
Sec61b	0.48555	0	0.979	0.868	0	2.12031	1.55853	Sec61 beta subunit [Source:MGI Symbol;Acc:MGI:1913462]
Pigr	0.476897	0	0.307	0.023	0	0.331667	0.0251455	polymeric immunoglobulin receptor [Source:MGI Symbol;Acc:MGI:103080]
Ran	0.473749	8.35519e-267	0.727	0.411	1.57938e-262	0.991877	0.526822	RAN, member RAS oncogene family [Source:MGI Symbol;Acc:MGI:1333112]
Phgr1	0.468968	0	0.306	0.024	0	0.324595	0.0266553	proline/histidine/glycine-rich 1 [Source:MGI Symbol;Acc:MGI:1858382]
Ppic	0.460254	0	0.806	0.465	0	1.11644	0.608696	peptidylprolyl isomerase C [Source:MGI Symbol;Acc:MGI:97751]
Tuba1b	0.459029	1.89977e-38	0.558	0.42	3.59114e-34	0.81455	0.57295	tubulin, alpha 1B [Source:MGI Symbol;Acc:MGI:107804]
Ptges	0.453338	0	0.432	0.066	0	0.428332	0.0735088	prostaglandin E synthase [Source:MGI Symbol;Acc:MGI:1927593]
Psme1	0.4512	0	0.887	0.581	0	1.36165	0.80945	proteasome (prosome, macropain) activator subunit 1 (PA28 alpha) [Source:MGI Symbol;Acc:MGI:1096367]
Mrpl33	0.449504	0	0.875	0.56	0	1.33079	0.778483	mitochondrial ribosomal protein L33 [Source:MGI Symbol;Acc:MGI:2137225]
H2-Q4	0.44852	0	0.529	0.154	0	0.576614	0.182713	histocompatibility 2, Q region locus 4 [Source:MGI Symbol;Acc:MGI:95933]
Snx7	0.446788	0	0.613	0.223	0	0.683359	0.260121	sorting nexin 7 [Source:MGI Symbol;Acc:MGI:1923811]
Atp5g2	0.440831	0	0.966	0.812	0	1.89721	1.34877	ATP synthase, H+ transporting, mitochondrial F0 complex, subunit C2 (subunit 9) [Source:MGI Symbol;Acc:MGI:1915192]
Calr	0.438737	1.65598e-256	0.797	0.499	3.13029e-252	1.16636	0.687912	calreticulin [Source:MGI Symbol;Acc:MGI:88252]
Acsl4	0.438453	0	0.862	0.551	0	1.28517	0.76732	acyl-CoA synthetase long-chain family member 4 [Source:MGI Symbol;Acc:MGI:1354713]
AW112010	0.436675	3.6697e-155	0.231	0.061	6.93684e-151	0.297382	0.0921669	expressed sequence AW112010 [Source:MGI Symbol;Acc:MGI:2147706]
Fdx1	0.43538	2.51873e-300	0.785	0.446	4.76115e-296	1.05144	0.573866	ferredoxin 1 [Source:MGI Symbol;Acc:MGI:103224]
Spc24	0.434663	3.19781e-248	0.277	0.055	6.04483e-244	0.330511	0.0646069	SPC24, NDC80 kinetochore complex component, homolog (S. cerevisiae) [Source:MGI Symbol;Acc:MGI:1914879]
Ngfrap1	0.433491	1.14635e-298	0.853	0.563	2.16695e-294	1.29664	0.788002	NA
Sh3bgrl3	0.426149	2.31677e-302	0.882	0.595	4.37939e-298	1.38179	0.859542	SH3 domain binding glutamic acid-rich protein-like 3 [Source:MGI Symbol;Acc:MGI:1920973]
Hmgb1	0.424882	8.14441e-203	0.943	0.795	1.53954e-198	1.7967	1.34002	high mobility group box 1 [Source:MGI Symbol;Acc:MGI:96113]
Atp5h	0.423423	0	0.987	0.906	0	2.21567	1.69595	ATP synthase, H+ transporting, mitochondrial F0 complex, subunit D [Source:MGI Symbol;Acc:MGI:1918929]
2700094K13Rik	0.422537	6.66795e-192	0.762	0.501	1.26044e-187	1.08255	0.667142	NA
Atp5b	0.4205	6.43613e-296	0.897	0.672	1.21662e-291	1.49829	0.998063	ATP synthase, H+ transporting mitochondrial F1 complex, beta subunit [Source:MGI Symbol;Acc:MGI:107801]
Mrpl17	0.419541	0	0.656	0.281	0	0.752045	0.33219	mitochondrial ribosomal protein L17 [Source:MGI Symbol;Acc:MGI:1351608]
Kcnj15	0.41682	1.14258e-275	0.734	0.384	2.15982e-271	0.939318	0.493939	potassium inwardly-rectifying channel, subfamily J, member 15 [Source:MGI Symbol;Acc:MGI:1310000]
Cdk1	0.415894	5.71607e-237	0.182	0.01	1.08051e-232	0.230336	0.0145447	cyclin-dependent kinase 1 [Source:MGI Symbol;Acc:MGI:88351]
Snrpd1	0.415479	3.82671e-305	0.616	0.258	7.23363e-301	0.705195	0.306584	small nuclear ribonucleoprotein D1 [Source:MGI Symbol;Acc:MGI:98344]
Uqcrb	0.414431	0	0.974	0.85	0	1.96057	1.447	ubiquinol-cytochrome c reductase binding protein [Source:MGI Symbol;Acc:MGI:1914780]
Etfb	0.414372	0	0.912	0.686	0	1.52855	1.02132	electron transferring flavoprotein, beta polypeptide [Source:MGI Symbol;Acc:MGI:106098]
Ndufb5	0.413495	0	0.91	0.644	0	1.43511	0.918018	NADH:ubiquinone oxidoreductase subunit B5 [Source:MGI Symbol;Acc:MGI:1913296]
Atp5g1	0.412307	0	0.911	0.66	0	1.46543	0.957289	ATP synthase, H+ transporting, mitochondrial F0 complex, subunit C1 (subunit 9) [Source:MGI Symbol;Acc:MGI:107653]
Cfl1	0.411299	0	0.908	0.661	0	1.5001	0.982202	cofilin 1, non-muscle [Source:MGI Symbol;Acc:MGI:101757]
Sdf2l1	0.410706	0	0.397	0.098	0	0.423052	0.113125	stromal cell-derived factor 2-like 1 [Source:MGI Symbol;Acc:MGI:2149842]
Ppia	0.408662	0	0.999	0.991	0	3.14585	2.71019	peptidylprolyl isomerase A [Source:MGI Symbol;Acc:MGI:97749]
Sec61g	0.408092	0	0.991	0.935	0	2.4143	1.92934	SEC61, gamma subunit [Source:MGI Symbol;Acc:MGI:1202066]
Ckmt1	0.407321	0	0.434	0.101	0	0.441618	0.112733	creatine kinase, mitochondrial 1, ubiquitous [Source:MGI Symbol;Acc:MGI:99441]
Me1	0.405082	0	0.656	0.285	0	0.755058	0.343777	malic enzyme 1, NADP(+)-dependent, cytosolic [Source:MGI Symbol;Acc:MGI:97043]
Ilk	0.404921	0	0.491	0.156	0	0.523191	0.179476	integrin linked kinase [Source:MGI Symbol;Acc:MGI:1195267]
Slc6a20a	0.403037	0	0.347	0.034	0	0.3319	0.0380714	solute carrier family 6 (neurotransmitter transporter), member 20A [Source:MGI Symbol;Acc:MGI:2143217]
Uqcr10	0.399509	0	0.983	0.874	0	2.05254	1.54958	ubiquinol-cytochrome c reductase, complex III subunit X [Source:MGI Symbol;Acc:MGI:1913402]
Atp5c1	0.398751	5.44515e-288	0.848	0.546	1.0293e-283	1.21863	0.739599	ATP synthase, H+ transporting, mitochondrial F1 complex, gamma polypeptide 1 [Source:MGI Symbol;Acc:MGI:1261437]
Arl6ip1	0.396707	1.74089e-173	0.921	0.767	3.29081e-169	1.68384	1.26235	ADP-ribosylation factor-like 6 interacting protein 1 [Source:MGI Symbol;Acc:MGI:1858943]
Atp5j2	0.393688	0	0.99	0.912	0	2.23773	1.74805	ATP synthase, H+ transporting, mitochondrial F0 complex, subunit F2 [Source:MGI Symbol;Acc:MGI:1927558]
Glrx	0.390636	1.70584e-267	0.691	0.341	3.22455e-263	0.83497	0.424763	glutaredoxin [Source:MGI Symbol;Acc:MGI:2135625]
Cox8a	0.390362	0	0.998	0.981	0	2.81295	2.36013	cytochrome c oxidase subunit 8A [Source:MGI Symbol;Acc:MGI:105959]
Hn1	0.388105	2.79085e-197	0.408	0.158	5.27554e-193	0.467564	0.186465	NA
Calm1	0.38605	0	0.985	0.868	0	2.36921	1.74337	calmodulin 1 [Source:MGI Symbol;Acc:MGI:88251]
Ndufa4	0.386005	0	0.991	0.931	0	2.33648	1.8584	Ndufa4, mitochondrial complex associated [Source:MGI Symbol;Acc:MGI:107686]
AU021092	0.38589	8.72448e-284	0.613	0.264	1.64919e-279	0.696364	0.316048	expressed sequence AU021092 [Source:MGI Symbol;Acc:MGI:2146559]
Cdca3	0.383421	9.48604e-233	0.178	0.01	1.79315e-228	0.219316	0.0126737	cell division cycle associated 3 [Source:MGI Symbol;Acc:MGI:1315198]
Ssr4	0.383333	1.92058e-278	0.881	0.616	3.63047e-274	1.34835	0.871174	signal sequence receptor, delta [Source:MGI Symbol;Acc:MGI:1099464]
Prdx1	0.382165	0	0.993	0.951	0	2.6221	2.14914	peroxiredoxin 1 [Source:MGI Symbol;Acc:MGI:99523]
Ldha	0.381953	1.37841e-271	0.901	0.669	2.6056e-267	1.47581	0.998076	lactate dehydrogenase A [Source:MGI Symbol;Acc:MGI:96759]
Ndufb6	0.381171	1.20443e-286	0.804	0.464	2.27674e-282	1.04898	0.595779	NADH:ubiquinone oxidoreductase subunit B6 [Source:MGI Symbol;Acc:MGI:2684983]
Pfdn1	0.380389	3.35739e-284	0.793	0.444	6.34647e-280	1.02528	0.572836	prefoldin 1 [Source:MGI Symbol;Acc:MGI:1914449]
Atp5k	0.379738	0	0.959	0.772	0	1.71512	1.22277	ATP synthase, H+ transporting, mitochondrial F1F0 complex, subunit E [Source:MGI Symbol;Acc:MGI:106636]
Ndufa5	0.379575	1.97486e-261	0.827	0.512	3.73307e-257	1.12609	0.675485	NADH:ubiquinone oxidoreductase subunit A5 [Source:MGI Symbol;Acc:MGI:1915452]
Isg15	0.37911	1.68871e-211	0.22	0.035	3.19218e-207	0.247777	0.0471714	ISG15 ubiquitin-like modifier [Source:MGI Symbol;Acc:MGI:1855694]
Clic1	0.378437	1.33733e-234	0.839	0.566	2.52795e-230	1.24375	0.791796	chloride intracellular channel 1 [Source:MGI Symbol;Acc:MGI:2148924]
Atox1	0.376417	0	0.983	0.875	0	2.05401	1.5777	antioxidant 1 copper chaperone [Source:MGI Symbol;Acc:MGI:1333855]
Ybx1	0.375172	4.7511e-275	0.882	0.612	8.98101e-271	1.37421	0.888227	Y box protein 1 [Source:MGI Symbol;Acc:MGI:99146]
Socs2	0.374548	3.87161e-226	0.864	0.611	7.3185e-222	1.33385	0.88282	suppressor of cytokine signaling 2 [Source:MGI Symbol;Acc:MGI:1201787]
Cdc20	0.372949	1.1173e-190	0.171	0.018	2.11203e-186	0.210634	0.0237875	cell division cycle 20 [Source:MGI Symbol;Acc:MGI:1859866]
P4hb	0.371193	5.15339e-238	0.777	0.457	9.74146e-234	1.01652	0.592754	prolyl 4-hydroxylase, beta polypeptide [Source:MGI Symbol;Acc:MGI:97464]
Minos1	0.370466	0	0.959	0.775	0	1.72891	1.22739	NA
Calm3	0.369117	3.34762e-289	0.522	0.186	6.328e-285	0.553259	0.217462	calmodulin 3 [Source:MGI Symbol;Acc:MGI:103249]
Ndufab1	0.368918	2.75945e-282	0.846	0.536	5.21618e-278	1.1889	0.722043	NADH:ubiquinone oxidoreductase subunit AB1 [Source:MGI Symbol;Acc:MGI:1917566]
Ndufb8	0.367856	3.94061e-265	0.878	0.612	7.44894e-261	1.30686	0.850141	NADH:ubiquinone oxidoreductase subunit B8 [Source:MGI Symbol;Acc:MGI:1914514]
Vmp1	0.367435	2.71099e-258	0.678	0.326	5.12459e-254	0.784594	0.397981	vacuole membrane protein 1 [Source:MGI Symbol;Acc:MGI:1923159]
Cox6b1	0.365654	0	0.991	0.929	0	2.33065	1.87118	cytochrome c oxidase, subunit 6B1 [Source:MGI Symbol;Acc:MGI:107460]
Cd44	0.365138	5.91796e-226	0.5	0.205	1.11867e-221	0.551375	0.241207	CD44 antigen [Source:MGI Symbol;Acc:MGI:88338]
1110008P14Rik	0.364765	3.5071e-247	0.778	0.445	6.62947e-243	0.988251	0.567585	RIKEN cDNA 1110008P14 gene [Source:MGI Symbol;Acc:MGI:1920987]
Tceb2	0.364181	0	0.973	0.841	0	1.91964	1.44959	NA
Atp5g3	0.362728	4.30846e-265	0.866	0.566	8.14429e-261	1.23667	0.77577	ATP synthase, H+ transporting, mitochondrial F0 complex, subunit C3 (subunit 9) [Source:MGI Symbol;Acc:MGI:2442035]
Ndufb7	0.361801	2.37572e-278	0.915	0.676	4.49082e-274	1.4386	0.975439	NADH:ubiquinone oxidoreductase subunit B7 [Source:MGI Symbol;Acc:MGI:1914166]
Ndufa12	0.361527	9.34548e-267	0.868	0.585	1.76658e-262	1.26999	0.809386	NADH:ubiquinone oxidoreductase subunit A12 [Source:MGI Symbol;Acc:MGI:1913664]
Krt7	0.361379	3.55119e-186	0.514	0.234	6.71281e-182	0.605087	0.301661	keratin 7 [Source:MGI Symbol;Acc:MGI:96704]
Ndufs6	0.359993	8.26332e-288	0.919	0.674	1.56202e-283	1.45352	0.981849	NADH:ubiquinone oxidoreductase core subunit S6 [Source:MGI Symbol;Acc:MGI:107932]
Pf4	0.359178	1.27349e-264	0.321	0.071	2.40727e-260	0.332221	0.0811036	platelet factor 4 [Source:MGI Symbol;Acc:MGI:1888711]
Mrpl42	0.35873	2.80024e-256	0.672	0.331	5.2933e-252	0.79169	0.405455	mitochondrial ribosomal protein L42 [Source:MGI Symbol;Acc:MGI:1333774]
Slc5a1	0.358175	0	0.281	0.012	0	0.261205	0.0119033	solute carrier family 5 (sodium/glucose cotransporter), member 1 [Source:MGI Symbol;Acc:MGI:107678]
Fcer2a	0.357483	0	0.261	0.006	0	0.246898	0.00665112	Fc receptor, IgE, low affinity II, alpha polypeptide [Source:MGI Symbol;Acc:MGI:95497]
Dbi	0.357267	5.84506e-302	0.99	0.95	1.10489e-297	2.57539	2.14899	diazepam binding inhibitor [Source:MGI Symbol;Acc:MGI:94865]
Ndufb9	0.35669	1.09152e-273	0.916	0.685	2.06329e-269	1.45924	0.998959	NADH:ubiquinone oxidoreductase subunit B9 [Source:MGI Symbol;Acc:MGI:1913468]
Ndufs8	0.356674	5.98667e-252	0.73	0.392	1.13166e-247	0.886022	0.484801	NADH:ubiquinone oxidoreductase core subunit S8 [Source:MGI Symbol;Acc:MGI:2385079]
Tmsb4x	0.354772	0	1	1	0	5.00684	4.64946	thymosin, beta 4, X chromosome [Source:MGI Symbol;Acc:MGI:99510]
Atp5l	0.352009	0	0.994	0.94	0	2.40133	1.95415	ATP synthase, H+ transporting, mitochondrial F0 complex, subunit G [Source:MGI Symbol;Acc:MGI:1351597]
Clip4	0.351798	6.60563e-290	0.446	0.135	1.24866e-285	0.44825	0.152362	CAP-GLY domain containing linker protein family, member 4 [Source:MGI Symbol;Acc:MGI:1919100]
Nsmce1	0.351362	4.34841e-258	0.5	0.186	8.2198e-254	0.52779	0.21472	NSE1 homolog, SMC5-SMC6 complex component [Source:MGI Symbol;Acc:MGI:1914961]
Psmb1	0.350703	2.47842e-240	0.876	0.614	4.68495e-236	1.29777	0.858619	proteasome (prosome, macropain) subunit, beta type 1 [Source:MGI Symbol;Acc:MGI:104884]
Psma4	0.349783	1.4961e-239	0.638	0.308	2.82808e-235	0.731848	0.371067	proteasome (prosome, macropain) subunit, alpha type 4 [Source:MGI Symbol;Acc:MGI:1347060]
Cxcl15	0.34975	0	0.998	0.986	0	4.30973	3.88833	chemokine (C-X-C motif) ligand 15 [Source:MGI Symbol;Acc:MGI:1339941]
Cxcl17	0.349124	6.74636e-283	0.585	0.237	1.27526e-278	0.727216	0.334639	chemokine (C-X-C motif) ligand 17 [Source:MGI Symbol;Acc:MGI:2387642]
Scgb3a1	0.347948	1.06665e-22	0.142	0.082	2.01628e-18	0.146959	0.0969692	secretoglobin, family 3A, member 1 [Source:MGI Symbol;Acc:MGI:1915912]
Cxcl3	0.347711	1.67256e-238	0.182	0.01	3.16165e-234	0.198545	0.010836	chemokine (C-X-C motif) ligand 3 [Source:MGI Symbol;Acc:MGI:3037818]
Pim1	0.347079	7.66811e-250	0.361	0.1	1.4495e-245	0.376754	0.117249	proviral integration site 1 [Source:MGI Symbol;Acc:MGI:97584]
Tmem30a	0.346818	1.75505e-232	0.792	0.467	3.31757e-228	1.03555	0.615896	transmembrane protein 30A [Source:MGI Symbol;Acc:MGI:106402]
Atp5e	0.346265	0	0.994	0.95	0	2.47084	2.03588	ATP synthase, H+ transporting, mitochondrial F1 complex, epsilon subunit [Source:MGI Symbol;Acc:MGI:1855697]
Fuom	0.345634	5.13598e-275	0.465	0.153	9.70853e-271	0.479558	0.177472	fucose mutarotase [Source:MGI Symbol;Acc:MGI:1916314]
Psmb2	0.345536	3.76793e-223	0.742	0.423	7.12251e-219	0.923455	0.531974	proteasome (prosome, macropain) subunit, beta type 2 [Source:MGI Symbol;Acc:MGI:1347045]
Ccnd1	0.345401	1.7259e-230	0.558	0.243	3.26248e-226	0.627301	0.29739	cyclin D1 [Source:MGI Symbol;Acc:MGI:88313]
Tpm4	0.345031	2.81134e-203	0.684	0.379	5.31427e-199	0.85548	0.485143	tropomyosin 4 [Source:MGI Symbol;Acc:MGI:2449202]
Cyc1	0.343555	1.79433e-248	0.638	0.3	3.39182e-244	0.716938	0.357605	cytochrome c-1 [Source:MGI Symbol;Acc:MGI:1913695]
Cox7c	0.342058	0	0.992	0.931	0	2.30439	1.86788	cytochrome c oxidase subunit 7C [Source:MGI Symbol;Acc:MGI:103226]
Psmb3	0.34083	4.78315e-212	0.831	0.555	9.04158e-208	1.16171	0.75045	proteasome (prosome, macropain) subunit, beta type 3 [Source:MGI Symbol;Acc:MGI:1347014]
Mdh2	0.340623	4.20201e-230	0.735	0.407	7.94306e-226	0.903989	0.512412	malate dehydrogenase 2, NAD (mitochondrial) [Source:MGI Symbol;Acc:MGI:97050]
Ranbp1	0.340259	4.10394e-174	0.611	0.334	7.75768e-170	0.744225	0.415185	RAN binding protein 1 [Source:MGI Symbol;Acc:MGI:96269]
Cox6c	0.340136	0	0.999	0.98	0	2.77982	2.36892	cytochrome c oxidase subunit 6C [Source:MGI Symbol;Acc:MGI:104614]
Smdt1	0.339459	2.75205e-283	0.945	0.744	5.2022e-279	1.61744	1.1563	single-pass membrane protein with aspartate rich tail 1 [Source:MGI Symbol;Acc:MGI:1916279]
Gja1	0.338126	2.85456e-225	0.53	0.227	5.39597e-221	0.585176	0.270648	gap junction protein, alpha 1 [Source:MGI Symbol;Acc:MGI:95713]
St3gal6	0.337594	9.19149e-292	0.449	0.134	1.73747e-287	0.444638	0.152749	ST3 beta-galactoside alpha-2,3-sialyltransferase 6 [Source:MGI Symbol;Acc:MGI:1888707]
Atp5j	0.337025	0	0.984	0.873	0	1.99493	1.5449	ATP synthase, H+ transporting, mitochondrial F0 complex, subunit F [Source:MGI Symbol;Acc:MGI:107777]
Ssr2	0.33695	3.4635e-202	0.807	0.522	6.54705e-198	1.09618	0.696627	signal sequence receptor, beta [Source:MGI Symbol;Acc:MGI:1913506]
Ptpn18	0.33655	3.71171e-261	0.409	0.125	7.01625e-257	0.411427	0.138926	protein tyrosine phosphatase, non-receptor type 18 [Source:MGI Symbol;Acc:MGI:108410]
Cxcl5	0.336121	6.88949e-157	0.117	0.004	1.30232e-152	0.140646	0.00491818	chemokine (C-X-C motif) ligand 5 [Source:MGI Symbol;Acc:MGI:1096868]
Psmb6	0.334286	2.42777e-214	0.824	0.544	4.58921e-210	1.14919	0.737114	proteasome (prosome, macropain) subunit, beta type 6 [Source:MGI Symbol;Acc:MGI:104880]
Cenpa	0.333878	3.17845e-189	0.157	0.013	6.00823e-185	0.194773	0.0180268	centromere protein A [Source:MGI Symbol;Acc:MGI:88375]
Psmb10	0.333554	7.15107e-251	0.408	0.128	1.35177e-246	0.413078	0.144177	proteasome (prosome, macropain) subunit, beta type 10 [Source:MGI Symbol;Acc:MGI:1096380]
Ube2s	0.330443	7.80042e-88	0.639	0.43	1.47451e-83	0.838882	0.558532	ubiquitin-conjugating enzyme E2S [Source:MGI Symbol;Acc:MGI:1925141]
Ndufa11	0.330422	5.50909e-238	0.863	0.572	1.04138e-233	1.22462	0.788553	NADH:ubiquinone oxidoreductase subunit A11 [Source:MGI Symbol;Acc:MGI:1917125]
Spcs1	0.329539	7.75253e-227	0.881	0.635	1.46546e-222	1.33326	0.906393	signal peptidase complex subunit 1 homolog (S. cerevisiae) [Source:MGI Symbol;Acc:MGI:1916269]
Dynlt3	0.329024	3.74658e-233	0.645	0.31	7.08215e-229	0.725784	0.374558	dynein light chain Tctex-type 3 [Source:MGI Symbol;Acc:MGI:1914367]
Apobec3	0.327886	1.1262e-277	0.416	0.12	2.12886e-273	0.409597	0.135358	apolipoprotein B mRNA editing enzyme, catalytic polypeptide 3 [Source:MGI Symbol;Acc:MGI:1933111]
Rps2	0.327813	0	0.998	0.981	0	2.78274	2.41711	ribosomal protein S2 [Source:MGI Symbol;Acc:MGI:105110]
Nfkbia	0.327718	3.74572e-149	0.55	0.298	7.08054e-145	0.75993	0.434127	nuclear factor of kappa light polypeptide gene enhancer in B cells inhibitor, alpha [Source:MGI Symbol;Acc:MGI:104741]
Arpc1b	0.327575	6.55813e-195	0.74	0.431	1.23968e-190	0.924331	0.551737	actin related protein 2/3 complex, subunit 1B [Source:MGI Symbol;Acc:MGI:1343142]
Tpm1	0.325554	4.03622e-201	0.868	0.606	7.62967e-197	1.29931	0.876732	tropomyosin 1, alpha [Source:MGI Symbol;Acc:MGI:98809]
Slco4c1	0.32486	3.64936e-214	0.554	0.247	6.89838e-210	0.607411	0.295996	solute carrier organic anion transporter family, member 4C1 [Source:MGI Symbol;Acc:MGI:2442784]
Actb	0.324781	4.08969e-148	0.997	0.975	7.73075e-144	2.95548	2.58273	actin, beta [Source:MGI Symbol;Acc:MGI:87904]
Rps27l	0.324721	1.4123e-231	0.967	0.829	2.66968e-227	1.83921	1.41544	ribosomal protein S27-like [Source:MGI Symbol;Acc:MGI:1915191]
Psma3	0.323726	3.71979e-207	0.799	0.506	7.03151e-203	1.07445	0.675036	proteasome (prosome, macropain) subunit, alpha type 3 [Source:MGI Symbol;Acc:MGI:104883]
Hsp90b1	0.323311	2.71553e-164	0.831	0.589	5.13317e-160	1.24193	0.850988	heat shock protein 90, beta (Grp94), member 1 [Source:MGI Symbol;Acc:MGI:98817]
Dynll1	0.322062	0	0.98	0.812	0	2.12023	1.486	dynein light chain LC8-type 1 [Source:MGI Symbol;Acc:MGI:1861457]
Metrnl	0.321784	5.73744e-293	0.333	0.067	1.08455e-288	0.316267	0.0728205	meteorin, glial cell differentiation regulator-like [Source:MGI Symbol;Acc:MGI:2384806]
Sox9	0.320291	0	0.204	0.001	0	0.20066	0.00141661	SRY (sex determining region Y)-box 9 [Source:MGI Symbol;Acc:MGI:98371]
Fam96a	0.319994	8.95969e-240	0.545	0.224	1.69365e-235	0.565531	0.257259	NA
Ctsh	0.317607	1.16346e-247	0.982	0.899	2.19929e-243	2.3731	1.9192	cathepsin H [Source:MGI Symbol;Acc:MGI:107285]
Ube2l3	0.317061	2.9401e-219	0.613	0.288	5.55767e-215	0.673784	0.343884	ubiquitin-conjugating enzyme E2L 3 [Source:MGI Symbol;Acc:MGI:109240]
Hibadh	0.316834	3.95173e-221	0.589	0.27	7.46996e-217	0.640781	0.319849	3-hydroxyisobutyrate dehydrogenase [Source:MGI Symbol;Acc:MGI:1889802]
Cox7b	0.316575	1.04529e-236	0.946	0.78	1.97591e-232	1.68321	1.25789	cytochrome c oxidase subunit 7B [Source:MGI Symbol;Acc:MGI:1913392]
Icam1	0.315119	1.96446e-181	0.73	0.428	3.71342e-177	0.929953	0.565144	intercellular adhesion molecule 1 [Source:MGI Symbol;Acc:MGI:96392]
Tpp1	0.31479	1.31705e-219	0.545	0.236	2.48962e-215	0.587209	0.281339	tripeptidyl peptidase I [Source:MGI Symbol;Acc:MGI:1336194]
Ndufa2	0.314731	0	0.99	0.912	0	2.15777	1.74281	NADH:ubiquinone oxidoreductase subunit A2 [Source:MGI Symbol;Acc:MGI:1343103]
Dtymk	0.314104	1.00669e-195	0.425	0.168	1.90294e-191	0.447449	0.189486	deoxythymidylate kinase [Source:MGI Symbol;Acc:MGI:108396]
Mrps14	0.313981	3.28726e-207	0.715	0.395	6.21392e-203	0.854128	0.492208	mitochondrial ribosomal protein S14 [Source:MGI Symbol;Acc:MGI:1928141]
Hsd17b10	0.313376	6.37843e-174	0.807	0.545	1.20572e-169	1.12211	0.744759	hydroxysteroid (17-beta) dehydrogenase 10 [Source:MGI Symbol;Acc:MGI:1333871]
Tmem167	0.3132	1.88255e-212	0.629	0.308	3.55858e-208	0.704133	0.371942	transmembrane protein 167 [Source:MGI Symbol;Acc:MGI:1913324]
Eif2s2	0.312455	1.02762e-182	0.796	0.501	1.94251e-178	1.05777	0.674823	eukaryotic translation initiation factor 2, subunit 2 (beta) [Source:MGI Symbol;Acc:MGI:1914454]
Ager	0.311213	3.96524e-293	0.98	0.877	7.4955e-289	2.40187	1.87923	advanced glycosylation end product-specific receptor [Source:MGI Symbol;Acc:MGI:893592]
St3gal4	0.311112	1.00325e-301	0.287	0.04	1.89645e-297	0.267302	0.0440699	ST3 beta-galactoside alpha-2,3-sialyltransferase 4 [Source:MGI Symbol;Acc:MGI:1316743]
Ift20	0.309206	1.10168e-175	0.88	0.656	2.0825e-171	1.37974	0.981362	intraflagellar transport 20 [Source:MGI Symbol;Acc:MGI:1915585]
Prdx3	0.30876	2.32929e-224	0.533	0.224	4.40306e-220	0.55165	0.255755	peroxiredoxin 3 [Source:MGI Symbol;Acc:MGI:88034]
Ndufa13	0.308582	1.24189e-277	0.975	0.852	2.34755e-273	1.8644	1.44969	NADH:ubiquinone oxidoreductase subunit A13 [Source:MGI Symbol;Acc:MGI:1914434]
Gfer	0.308116	5.99264e-267	0.379	0.102	1.13279e-262	0.36151	0.111607	growth factor, augmenter of liver regeneration [Source:MGI Symbol;Acc:MGI:107757]
Ptma	0.308072	1.19231e-127	0.997	0.988	2.25383e-123	2.90248	2.6139	prothymosin alpha [Source:MGI Symbol;Acc:MGI:97803]
Rnaset2b	0.30807	2.41942e-185	0.763	0.469	4.57343e-181	0.973457	0.606416	ribonuclease T2B [Source:MGI Symbol;Acc:MGI:3702087]
Il4i1	0.307929	7.73545e-219	0.158	0.005	1.46223e-214	0.172775	0.0066702	interleukin 4 induced 1 [Source:MGI Symbol;Acc:MGI:109552]
Avpi1	0.306851	1.70285e-204	0.903	0.682	3.21889e-200	1.42281	1.01245	arginine vasopressin-induced 1 [Source:MGI Symbol;Acc:MGI:1916784]
Ndufc1	0.30678	8.21257e-208	0.914	0.676	1.55242e-203	1.41931	0.99892	NADH:ubiquinone oxidoreductase subunit C1 [Source:MGI Symbol;Acc:MGI:1913627]
Anxa1	0.30655	3.43782e-206	0.533	0.231	6.4985e-202	0.647262	0.329095	annexin A1 [Source:MGI Symbol;Acc:MGI:96819]
Psma2	0.305867	3.27303e-183	0.804	0.528	6.187e-179	1.08887	0.70944	proteasome (prosome, macropain) subunit, alpha type 2 [Source:MGI Symbol;Acc:MGI:104885]
Sdhb	0.305835	5.02231e-195	0.648	0.343	9.49368e-191	0.741468	0.41222	succinate dehydrogenase complex, subunit B, iron sulfur (Ip) [Source:MGI Symbol;Acc:MGI:1914930]
Psmb4	0.30561	1.19228e-178	0.743	0.456	2.25377e-174	0.936517	0.581946	proteasome (prosome, macropain) subunit, beta type 4 [Source:MGI Symbol;Acc:MGI:1098257]
Ostc	0.305498	1.73673e-180	0.645	0.346	3.28293e-176	0.74887	0.4257	oligosaccharyltransferase complex subunit (non-catalytic) [Source:MGI Symbol;Acc:MGI:1913607]
Pomp	0.305355	2.75926e-193	0.855	0.589	5.21583e-189	1.20858	0.813312	proteasome maturation protein [Source:MGI Symbol;Acc:MGI:1913787]
Mrpl18	0.305105	2.03021e-207	0.564	0.258	3.83771e-203	0.599605	0.29858	mitochondrial ribosomal protein L18 [Source:MGI Symbol;Acc:MGI:1914931]
Uqcr11	0.304326	1.59133e-300	0.992	0.926	3.00809e-296	2.2405	1.84024	ubiquinol-cytochrome c reductase, complex III subunit XI [Source:MGI Symbol;Acc:MGI:1913844]
Mapk13	0.304058	2.30136e-254	0.437	0.141	4.35025e-250	0.425766	0.159067	mitogen-activated protein kinase 13 [Source:MGI Symbol;Acc:MGI:1346864]
Ndufv2	0.302989	1.19952e-194	0.695	0.382	2.26746e-190	0.817779	0.472818	NADH:ubiquinone oxidoreductase core subunit V2 [Source:MGI Symbol;Acc:MGI:1920150]
Tyms	0.301856	1.4657e-203	0.252	0.056	2.77061e-199	0.259011	0.06092	thymidylate synthase [Source:MGI Symbol;Acc:MGI:98878]
Cxcl1	0.301437	4.22501e-128	0.163	0.035	7.98653e-124	0.196819	0.0499638	chemokine (C-X-C motif) ligand 1 [Source:MGI Symbol;Acc:MGI:108068]
Hspa5	0.300763	5.37424e-118	0.764	0.547	1.01589e-113	1.11818	0.784117	heat shock protein 5 [Source:MGI Symbol;Acc:MGI:95835]
A230065H16Rik	0.29982	2.59554e-153	0.108	0.002	4.90634e-149	0.122479	0.00246392	NA
Ube2n	0.299439	2.99006e-202	0.62	0.303	5.6521e-198	0.689517	0.368307	ubiquitin-conjugating enzyme E2N [Source:MGI Symbol;Acc:MGI:1934835]
Noxo1	0.297736	4.26054e-289	0.256	0.029	8.05371e-285	0.239496	0.0317042	NADPH oxidase organizer 1 [Source:MGI Symbol;Acc:MGI:1919143]
Mgst3	0.296587	1.50623e-218	0.61	0.288	2.84723e-214	0.694423	0.362133	microsomal glutathione S-transferase 3 [Source:MGI Symbol;Acc:MGI:1913697]
Ap2s1	0.295075	3.42969e-185	0.704	0.395	6.48314e-181	0.828364	0.488876	adaptor-related protein complex 2, sigma 1 subunit [Source:MGI Symbol;Acc:MGI:2141861]
Psmb5	0.294232	7.68867e-183	0.734	0.432	1.45339e-178	0.900677	0.549698	proteasome (prosome, macropain) subunit, beta type 5 [Source:MGI Symbol;Acc:MGI:1194513]
Tpm3	0.293302	1.07977e-187	0.685	0.374	2.04108e-183	0.810711	0.471422	tropomyosin 3, gamma [Source:MGI Symbol;Acc:MGI:1890149]
Psma7	0.292929	7.56992e-167	0.817	0.559	1.43094e-162	1.13361	0.764839	proteasome (prosome, macropain) subunit, alpha type 7 [Source:MGI Symbol;Acc:MGI:1347070]
Mrpl20	0.291377	1.35961e-187	0.688	0.371	2.57006e-183	0.790216	0.45684	mitochondrial ribosomal protein L20 [Source:MGI Symbol;Acc:MGI:2137221]
H2-T22	0.290721	1.26029e-263	0.326	0.072	2.38233e-259	0.30742	0.0821259	histocompatibility 2, T region locus 22 [Source:MGI Symbol;Acc:MGI:95956]
Erh	0.289842	1.66137e-168	0.749	0.466	3.1405e-164	0.961052	0.609937	ERH mRNA splicing and mitosis factor [Source:MGI Symbol;Acc:MGI:108089]
Mrpl51	0.288981	4.44653e-180	0.649	0.342	8.40528e-176	0.732447	0.416024	mitochondrial ribosomal protein L51 [Source:MGI Symbol;Acc:MGI:1913743]
Polr1c	0.287352	1.48494e-176	0.608	0.313	2.80699e-172	0.673632	0.37446	polymerase (RNA) I polypeptide C [Source:MGI Symbol;Acc:MGI:103288]
Ndufs4	0.287079	2.84027e-197	0.613	0.297	5.36896e-193	0.665725	0.356576	NADH:ubiquinone oxidoreductase core subunit S4 [Source:MGI Symbol;Acc:MGI:1343135]
Top2a	0.286244	6.13431e-174	0.143	0.011	1.15957e-169	0.170527	0.0151867	topoisomerase (DNA) II alpha [Source:MGI Symbol;Acc:MGI:98790]
Arg2	0.285352	1.98292e-201	0.406	0.148	3.74832e-197	0.40575	0.166457	arginase type II [Source:MGI Symbol;Acc:MGI:1330806]
Arpc3	0.284868	2.43696e-169	0.787	0.502	4.60658e-165	1.02243	0.663497	actin related protein 2/3 complex, subunit 3 [Source:MGI Symbol;Acc:MGI:1928375]
Lsm2	0.284057	2.1758e-194	0.384	0.138	4.11292e-190	0.386154	0.154381	LSM2 homolog, U6 small nuclear RNA and mRNA degradation associated [Source:MGI Symbol;Acc:MGI:90676]
Brd7	0.283201	1.52322e-176	0.624	0.321	2.87934e-172	0.704156	0.39639	bromodomain containing 7 [Source:MGI Symbol;Acc:MGI:1349766]
Polr2l	0.28276	1.27699e-168	0.729	0.427	2.4139e-164	0.875955	0.540306	polymerase (RNA) II (DNA directed) polypeptide L [Source:MGI Symbol;Acc:MGI:1913741]
Coq7	0.282371	1.0647e-208	0.449	0.17	2.01261e-204	0.446115	0.193262	demethyl-Q 7 [Source:MGI Symbol;Acc:MGI:107207]
Yipf6	0.281747	9.35463e-205	0.5	0.207	1.76831e-200	0.515187	0.243607	Yip1 domain family, member 6 [Source:MGI Symbol;Acc:MGI:1925179]
Mdh1	0.281384	3.64542e-165	0.71	0.424	6.89094e-161	0.872466	0.540093	malate dehydrogenase 1, NAD (soluble) [Source:MGI Symbol;Acc:MGI:97051]
Tagln2	0.280831	6.94972e-169	0.953	0.827	1.3137e-164	1.8532	1.46991	transgelin 2 [Source:MGI Symbol;Acc:MGI:1312985]
Cox6a1	0.280673	7.45472e-257	0.983	0.893	1.40916e-252	2.0461	1.65467	cytochrome c oxidase subunit 6A1 [Source:MGI Symbol;Acc:MGI:103099]
Bhlhe40	0.280563	1.05266e-200	0.416	0.153	1.98985e-196	0.42292	0.180075	basic helix-loop-helix family, member e40 [Source:MGI Symbol;Acc:MGI:1097714]
Mydgf	0.279884	1.05209e-179	0.626	0.321	1.98877e-175	0.694671	0.390016	myeloid derived growth factor [Source:MGI Symbol;Acc:MGI:2156020]
Anxa3	0.279065	3.82757e-133	0.774	0.505	7.23526e-129	1.03799	0.699269	annexin A3 [Source:MGI Symbol;Acc:MGI:1201378]
Lsm4	0.278833	3.8128e-165	0.602	0.318	7.20734e-161	0.682448	0.387376	LSM4 homolog, U6 small nuclear RNA and mRNA degradation associated [Source:MGI Symbol;Acc:MGI:1354692]
Sparc	0.277837	2.25444e-143	0.723	0.443	4.26157e-139	0.964202	0.627748	secreted acidic cysteine rich glycoprotein [Source:MGI Symbol;Acc:MGI:98373]
Ctps	0.277622	9.28759e-266	0.262	0.039	1.75563e-261	0.241476	0.0422303	cytidine 5'-triphosphate synthase [Source:MGI Symbol;Acc:MGI:1858304]
Actg1	0.276885	9.91752e-185	0.987	0.95	1.87471e-180	2.58765	2.2242	actin, gamma, cytoplasmic 1 [Source:MGI Symbol;Acc:MGI:87906]
Cenpm	0.275882	1.70162e-235	0.175	0.008	3.21657e-231	0.177398	0.00842747	centromere protein M [Source:MGI Symbol;Acc:MGI:1913820]
Psmb7	0.275027	1.74685e-176	0.603	0.307	3.30206e-172	0.66532	0.369703	proteasome (prosome, macropain) subunit, beta type 7 [Source:MGI Symbol;Acc:MGI:107637]
Hdgf	0.274672	3.8007e-156	0.621	0.337	7.18446e-152	0.718423	0.421071	heparin binding growth factor [Source:MGI Symbol;Acc:MGI:1194494]
Igfbp7	0.273768	1.85253e-132	0.855	0.634	3.50183e-128	1.35145	0.98985	insulin-like growth factor binding protein 7 [Source:MGI Symbol;Acc:MGI:1352480]
Prdx2	0.27375	7.29749e-159	0.841	0.577	1.37945e-154	1.16004	0.796029	peroxiredoxin 2 [Source:MGI Symbol;Acc:MGI:109486]
Bud31	0.273239	1.50687e-187	0.535	0.243	2.84843e-183	0.551768	0.280621	BUD31 homolog [Source:MGI Symbol;Acc:MGI:2141291]
Dnajb11	0.272925	1.01839e-205	0.439	0.165	1.92506e-201	0.431925	0.187282	DnaJ heat shock protein family (Hsp40) member B11 [Source:MGI Symbol;Acc:MGI:1915088]
Srp19	0.272913	4.64887e-184	0.573	0.274	8.78777e-180	0.611522	0.326789	signal recognition particle 19 [Source:MGI Symbol;Acc:MGI:1913634]
Tgoln1	0.272462	1.49108e-147	0.9	0.689	2.81859e-143	1.46408	1.08533	trans-golgi network protein [Source:MGI Symbol;Acc:MGI:105080]
Ndufs5	0.272129	1.3407e-172	0.886	0.645	2.53433e-168	1.29525	0.918766	NADH:ubiquinone oxidoreductase core subunit S5 [Source:MGI Symbol;Acc:MGI:1890889]
Serp1	0.271863	4.20135e-147	0.697	0.415	7.94182e-143	0.843244	0.529766	stress-associated endoplasmic reticulum protein 1 [Source:MGI Symbol;Acc:MGI:92638]
U2af1	0.270786	1.34625e-158	0.693	0.402	2.54481e-154	0.820929	0.504797	U2 small nuclear ribonucleoprotein auxiliary factor (U2AF) 1 [Source:MGI Symbol;Acc:MGI:98884]
Pbk	0.270348	3.24215e-175	0.138	0.008	6.12863e-171	0.156512	0.0101163	PDZ binding kinase [Source:MGI Symbol;Acc:MGI:1289156]
2010107E04Rik	0.269922	2.48546e-180	0.931	0.739	4.69827e-176	1.51693	1.13579	NA
Hmgn1	0.269904	4.69718e-141	0.917	0.774	8.87908e-137	1.61366	1.26632	high mobility group nucleosomal binding domain 1 [Source:MGI Symbol;Acc:MGI:96120]
Gpx1	0.269506	4.60402e-150	0.951	0.806	8.70298e-146	1.76181	1.39243	glutathione peroxidase 1 [Source:MGI Symbol;Acc:MGI:104887]
Uqcrc1	0.269434	6.60411e-175	0.551	0.265	1.24838e-170	0.584452	0.31082	ubiquinol-cytochrome c reductase core protein 1 [Source:MGI Symbol;Acc:MGI:107876]
Atp11a	0.269061	2.83402e-149	0.781	0.495	5.35715e-145	1.00554	0.662754	ATPase, class VI, type 11A [Source:MGI Symbol;Acc:MGI:1354735]
Tmem256	0.268111	4.3966e-165	0.93	0.753	8.3109e-161	1.55583	1.18496	transmembrane protein 256 [Source:MGI Symbol;Acc:MGI:1916436]
Ndufa3	0.267646	4.92731e-195	0.963	0.821	9.3141e-191	1.7331	1.3573	NADH:ubiquinone oxidoreductase subunit A3 [Source:MGI Symbol;Acc:MGI:1913341]
Gstt2	0.267134	4.97346e-210	0.415	0.147	9.40132e-206	0.400985	0.164796	glutathione S-transferase, theta 2 [Source:MGI Symbol;Acc:MGI:106188]
Slc35b1	0.267123	1.25032e-198	0.424	0.159	2.36348e-194	0.417481	0.180688	solute carrier family 35, member B1 [Source:MGI Symbol;Acc:MGI:1343133]
Cdkn3	0.266247	1.51456e-187	0.145	0.008	2.86297e-183	0.158769	0.00918065	cyclin-dependent kinase inhibitor 3 [Source:MGI Symbol;Acc:MGI:1919641]
Sumo2	0.266201	9.32882e-149	0.88	0.673	1.76343e-144	1.3613	1.00094	small ubiquitin-like modifier 2 [Source:MGI Symbol;Acc:MGI:2158813]
Tmed9	0.265957	1.12435e-151	0.682	0.396	2.12537e-147	0.811159	0.501393	transmembrane p24 trafficking protein 9 [Source:MGI Symbol;Acc:MGI:1914761]
Cnih4	0.265896	4.47459e-193	0.445	0.175	8.45832e-189	0.441915	0.199663	cornichon family AMPA receptor auxiliary protein 4 [Source:MGI Symbol;Acc:MGI:1925828]
Slc25a4	0.265185	7.64311e-158	0.707	0.423	1.44478e-153	0.870706	0.546606	solute carrier family 25 (mitochondrial carrier, adenine nucleotide translocator), member 4 [Source:MGI Symbol;Acc:MGI:1353495]
Edf1	0.265065	1.68597e-168	0.923	0.728	3.187e-164	1.47734	1.10737	endothelial differentiation-related factor 1 [Source:MGI Symbol;Acc:MGI:1891227]
Lap3	0.264636	2.35628e-215	0.365	0.113	4.45408e-211	0.341456	0.123602	leucine aminopeptidase 3 [Source:MGI Symbol;Acc:MGI:1914238]
Gpx4	0.264481	2.95902e-231	0.995	0.965	5.59344e-227	2.56706	2.24386	glutathione peroxidase 4 [Source:MGI Symbol;Acc:MGI:104767]
Cox20	0.264003	6.60028e-166	0.592	0.302	1.24765e-161	0.651236	0.367225	cytochrome c oxidase assembly protein 20 [Source:MGI Symbol;Acc:MGI:1913609]
Atp6v1g1	0.26253	6.34499e-191	0.98	0.9	1.19939e-186	2.06692	1.71654	ATPase, H+ transporting, lysosomal V1 subunit G1 [Source:MGI Symbol;Acc:MGI:1913540]
Nhp2	0.262332	3.34864e-193	0.478	0.197	6.32993e-189	0.483882	0.230798	NHP2 ribonucleoprotein [Source:MGI Symbol;Acc:MGI:1098547]
Ubl4a	0.261928	5.17263e-195	0.414	0.154	9.77783e-191	0.411035	0.177809	ubiquitin-like 4A [Source:MGI Symbol;Acc:MGI:95049]
Pdlim1	0.261891	2.03603e-157	0.59	0.305	3.84872e-153	0.661002	0.379112	PDZ and LIM domain 1 (elfin) [Source:MGI Symbol;Acc:MGI:1860611]
Lpp	0.261698	9.85642e-207	0.412	0.145	1.86316e-202	0.40117	0.167552	LIM domain containing preferred translocation partner in lipoma [Source:MGI Symbol;Acc:MGI:2441849]
Hint1	0.261333	8.16259e-223	0.965	0.848	1.54297e-218	1.87351	1.4841	histidine triad nucleotide binding protein 1 [Source:MGI Symbol;Acc:MGI:1321133]
Ppa1	0.26029	2.88134e-226	0.301	0.073	5.4466e-222	0.278319	0.0783718	pyrophosphatase (inorganic) 1 [Source:MGI Symbol;Acc:MGI:97831]
Psma6	0.260183	6.03447e-156	0.597	0.313	1.1407e-151	0.653646	0.375603	proteasome (prosome, macropain) subunit, alpha type 6 [Source:MGI Symbol;Acc:MGI:1347006]
Psma1	0.260007	1.16258e-161	0.584	0.3	2.19762e-157	0.637111	0.359758	proteasome (prosome, macropain) subunit, alpha type 1 [Source:MGI Symbol;Acc:MGI:1347005]
Rrm2	0.258357	2.03582e-155	0.123	0.007	3.8483e-151	0.141642	0.00928681	ribonucleotide reductase M2 [Source:MGI Symbol;Acc:MGI:98181]
Mia	0.257362	2.97001e-180	0.312	0.099	5.61421e-176	0.304617	0.109209	melanoma inhibitory activity [Source:MGI Symbol;Acc:MGI:109615]
Actl6a	0.256756	1.53294e-186	0.442	0.175	2.89773e-182	0.435898	0.20037	actin-like 6A [Source:MGI Symbol;Acc:MGI:1861453]
Chchd1	0.255633	5.92965e-152	0.659	0.37	1.12088e-147	0.74668	0.452697	coiled-coil-helix-coiled-coil-helix domain containing 1 [Source:MGI Symbol;Acc:MGI:1913371]
Pdia3	0.255373	8.62619e-134	0.7	0.434	1.63061e-129	0.862252	0.559529	protein disulfide isomerase associated 3 [Source:MGI Symbol;Acc:MGI:95834]
Pdap1	0.254904	2.47301e-150	0.611	0.33	4.67474e-146	0.686794	0.406027	PDGFA associated protein 1 [Source:MGI Symbol;Acc:MGI:2448536]
Hspe1	0.254436	5.2881e-157	0.871	0.635	9.9961e-153	1.28786	0.922312	heat shock protein 1 (chaperonin 10) [Source:MGI Symbol;Acc:MGI:104680]
Ndufs3	0.254424	1.7317e-157	0.651	0.352	3.27344e-153	0.724383	0.430867	NADH:ubiquinone oxidoreductase core subunit S3 [Source:MGI Symbol;Acc:MGI:1915599]
Sra1	0.253703	5.88645e-180	0.518	0.231	1.11272e-175	0.530913	0.272738	steroid receptor RNA activator 1 [Source:MGI Symbol;Acc:MGI:1344414]
1110008F13Rik	0.253687	5.928e-128	0.754	0.494	1.12057e-123	0.962937	0.650058	NA
Gng12	0.253393	7.07685e-179	0.459	0.19	1.33774e-174	0.456979	0.219906	guanine nucleotide binding protein (G protein), gamma 12 [Source:MGI Symbol;Acc:MGI:1336171]
Mtch2	0.252991	2.62228e-148	0.64	0.354	4.9569e-144	0.721977	0.434601	mitochondrial carrier 2 [Source:MGI Symbol;Acc:MGI:1929260]
Cldn7	0.251418	2.88909e-146	0.74	0.463	5.46125e-142	0.952846	0.623621	claudin 7 [Source:MGI Symbol;Acc:MGI:1859285]
Cd302	0.250512	4.30001e-170	0.483	0.214	8.1283e-166	0.499172	0.253868	CD302 antigen [Source:MGI Symbol;Acc:MGI:1913455]
Ddost	0.249927	1.74345e-149	0.583	0.307	3.29564e-145	0.63807	0.370058	dolichyl-di-phosphooligosaccharide-protein glycotransferase [Source:MGI Symbol;Acc:MGI:1194508]
Ywhah	0.249658	9.24051e-120	0.531	0.295	1.74673e-115	0.618946	0.371113	tyrosine 3-monooxygenase/tryptophan 5-monooxygenase activation protein, eta polypeptide [Source:MGI Symbol;Acc:MGI:109194]
Nme7	0.249428	4.43223e-241	0.248	0.038	8.37824e-237	0.224836	0.0433375	NME/NM23 family member 7 [Source:MGI Symbol;Acc:MGI:2449121]
Cdc42	0.248483	3.41577e-130	0.788	0.528	6.45684e-126	1.03631	0.712615	cell division cycle 42 [Source:MGI Symbol;Acc:MGI:106211]
Dut	0.248024	2.02527e-142	0.302	0.111	3.82837e-138	0.311059	0.128446	deoxyuridine triphosphatase [Source:MGI Symbol;Acc:MGI:1346051]
Cuta	0.247686	2.01567e-139	0.764	0.483	3.81022e-135	0.955042	0.634417	cutA divalent cation tolerance homolog [Source:MGI Symbol;Acc:MGI:1914925]
Dctpp1	0.247437	4.62211e-160	0.335	0.123	8.73717e-156	0.329935	0.135547	dCTP pyrophosphatase 1 [Source:MGI Symbol;Acc:MGI:1913672]
Btg3	0.246591	2.20067e-143	0.591	0.316	4.15992e-139	0.661567	0.391931	B cell translocation gene 3 [Source:MGI Symbol;Acc:MGI:109532]
Hdc	0.246319	7.25366e-136	0.543	0.292	1.37116e-131	0.688204	0.410945	histidine decarboxylase [Source:MGI Symbol;Acc:MGI:96062]
Arpc2	0.245218	1.54719e-121	0.76	0.512	2.92466e-117	0.983622	0.677717	actin related protein 2/3 complex, subunit 2 [Source:MGI Symbol;Acc:MGI:1923959]
Cox6b2	0.245182	1.16142e-134	0.412	0.189	2.19543e-130	0.44721	0.233565	cytochrome c oxidase subunit 6B2 [Source:MGI Symbol;Acc:MGI:3044182]
Eny2	0.244626	2.93936e-136	0.683	0.405	5.55628e-132	0.80355	0.510247	ENY2 transcription and export complex 2 subunit [Source:MGI Symbol;Acc:MGI:1919286]
Tnip3	0.244068	1.76712e-143	0.12	0.009	3.34038e-139	0.135266	0.0110076	TNFAIP3 interacting protein 3 [Source:MGI Symbol;Acc:MGI:3041165]
Coa3	0.243931	5.00158e-134	0.755	0.483	9.45449e-130	0.931635	0.622606	cytochrome C oxidase assembly factor 3 [Source:MGI Symbol;Acc:MGI:1098757]
Cenpf	0.24393	3.42474e-159	0.135	0.011	6.47379e-155	0.150373	0.0151908	centromere protein F [Source:MGI Symbol;Acc:MGI:1313302]
Mrps7	0.243708	8.06553e-186	0.411	0.154	1.52463e-181	0.392535	0.173198	mitchondrial ribosomal protein S7 [Source:MGI Symbol;Acc:MGI:1354367]
Tuba1c	0.243265	2.37263e-76	0.365	0.203	4.48499e-72	0.40854	0.237706	tubulin, alpha 1C [Source:MGI Symbol;Acc:MGI:1095409]
Chmp4b	0.242633	4.15646e-159	0.641	0.342	7.85695e-155	0.713877	0.424454	charged multivesicular body protein 4B [Source:MGI Symbol;Acc:MGI:1922858]
Lgals9	0.242588	3.91851e-170	0.389	0.15	7.40716e-166	0.380018	0.169881	lectin, galactose binding, soluble 9 [Source:MGI Symbol;Acc:MGI:109496]
Ceacam1	0.241788	2.20496e-191	0.265	0.066	4.16804e-187	0.245232	0.0700999	carcinoembryonic antigen-related cell adhesion molecule 1 [Source:MGI Symbol;Acc:MGI:1347245]
Commd2	0.24151	4.9649e-168	0.482	0.213	9.38516e-164	0.482362	0.245471	COMM domain containing 2 [Source:MGI Symbol;Acc:MGI:1098806]
Retnlg	0.241292	1.89658e-143	0.108	0.004	3.5851e-139	0.111852	0.00454015	resistin like gamma [Source:MGI Symbol;Acc:MGI:2667763]
Capza2	0.241074	1.09787e-155	0.612	0.314	2.07531e-151	0.659638	0.383733	capping protein (actin filament) muscle Z-line, alpha 2 [Source:MGI Symbol;Acc:MGI:106222]
Ctsb	0.241016	2.28435e-130	0.809	0.552	4.31811e-126	1.08922	0.760707	cathepsin B [Source:MGI Symbol;Acc:MGI:88561]
Mrpl12	0.240967	6.54401e-157	0.572	0.287	1.23701e-152	0.599583	0.338701	mitochondrial ribosomal protein L12 [Source:MGI Symbol;Acc:MGI:1926273]
Tmprss4	0.240078	2.6966e-172	0.45	0.188	5.09739e-168	0.446366	0.217779	transmembrane protease, serine 4 [Source:MGI Symbol;Acc:MGI:2384877]
Tmem14c	0.239429	1.29052e-132	0.667	0.389	2.43947e-128	0.759779	0.479361	transmembrane protein 14C [Source:MGI Symbol;Acc:MGI:1913404]
Eif4a1	0.239395	3.40492e-124	0.739	0.482	6.43633e-120	0.93858	0.635903	eukaryotic translation initiation factor 4A1 [Source:MGI Symbol;Acc:MGI:95303]
Panct2	0.239072	2.30582e-222	0.19	0.017	4.35869e-218	0.175183	0.0191796	pluripotency-associated noncoding transcript 2 [Source:MGI Symbol;Acc:MGI:3643517]
Ifngr2	0.238872	1.28385e-214	0.261	0.054	2.42687e-210	0.237832	0.0595737	interferon gamma receptor 2 [Source:MGI Symbol;Acc:MGI:107654]
Ube2a	0.237797	5.07486e-152	0.561	0.283	9.59301e-148	0.589402	0.334554	ubiquitin-conjugating enzyme E2A [Source:MGI Symbol;Acc:MGI:102959]
Cisd1	0.237318	3.33992e-146	0.646	0.353	6.31346e-142	0.722632	0.438995	CDGSH iron sulfur domain 1 [Source:MGI Symbol;Acc:MGI:1261855]
Ccnb2	0.236735	1.05285e-174	0.142	0.01	1.99021e-170	0.149753	0.0116709	cyclin B2 [Source:MGI Symbol;Acc:MGI:88311]
Dctn3	0.236334	8.02433e-138	0.698	0.417	1.51684e-133	0.813373	0.520831	dynactin 3 [Source:MGI Symbol;Acc:MGI:1859251]
Guca2a	0.235717	1.27683e-224	0.154	0.002	2.41359e-220	0.145963	0.00251963	guanylate cyclase activator 2a (guanylin) [Source:MGI Symbol;Acc:MGI:102738]
Akr1b8	0.235015	3.56623e-208	0.325	0.091	6.74125e-204	0.300748	0.104626	aldo-keto reductase family 1, member B8 [Source:MGI Symbol;Acc:MGI:107673]
Atp2a2	0.234516	1.93919e-128	0.567	0.306	3.66565e-124	0.618778	0.372002	ATPase, Ca++ transporting, cardiac muscle, slow twitch 2 [Source:MGI Symbol;Acc:MGI:88110]
Arf4	0.234288	2.26162e-121	0.722	0.454	4.27513e-117	0.880143	0.587587	ADP-ribosylation factor 4 [Source:MGI Symbol;Acc:MGI:99433]
Mal	0.233144	1.43913e-144	0.528	0.262	2.72039e-140	0.550314	0.30961	myelin and lymphocyte protein, T cell differentiation protein [Source:MGI Symbol;Acc:MGI:892970]
Mrpl21	0.232864	4.41132e-165	0.531	0.247	8.33872e-161	0.539467	0.291226	mitochondrial ribosomal protein L21 [Source:MGI Symbol;Acc:MGI:2660674]
Mad2l1	0.232193	2.49941e-188	0.177	0.022	4.72464e-184	0.172766	0.0243147	MAD2 mitotic arrest deficient-like 1 [Source:MGI Symbol;Acc:MGI:1860374]
Rgs10	0.232037	4.23528e-138	0.489	0.238	8.00595e-134	0.51305	0.284668	regulator of G-protein signalling 10 [Source:MGI Symbol;Acc:MGI:1915115]
Hemk1	0.231531	9.47242e-210	0.242	0.046	1.79057e-205	0.219972	0.0507836	HemK methyltransferase family member 1 [Source:MGI Symbol;Acc:MGI:1916786]
Ndufb11	0.23146	7.90617e-154	0.958	0.838	1.4945e-149	1.75337	1.42461	NADH:ubiquinone oxidoreductase subunit B11 [Source:MGI Symbol;Acc:MGI:1349919]
Atp6v1g3	0.231336	1.31396e-202	0.203	0.029	2.48378e-198	0.188327	0.0317276	ATPase, H+ transporting, lysosomal V1 subunit G3 [Source:MGI Symbol;Acc:MGI:2450548]
Eva1b	0.230688	1.24457e-172	0.422	0.169	2.35261e-168	0.417663	0.198285	eva-1 homolog B (C. elegans) [Source:MGI Symbol;Acc:MGI:1922063]
Dnajc15	0.230636	2.48662e-186	0.601	0.288	4.70047e-182	0.649696	0.361262	DnaJ heat shock protein family (Hsp40) member C15 [Source:MGI Symbol;Acc:MGI:1913398]
Vdac2	0.229776	1.2945e-138	0.605	0.327	2.44699e-134	0.656736	0.395391	voltage-dependent anion channel 2 [Source:MGI Symbol;Acc:MGI:106915]
Timm17a	0.229336	1.20798e-162	0.496	0.226	2.28345e-158	0.497799	0.261923	translocase of inner mitochondrial membrane 17a [Source:MGI Symbol;Acc:MGI:1343131]
Trappc1	0.229044	1.15387e-161	0.481	0.216	2.18115e-157	0.480569	0.249752	trafficking protein particle complex 1 [Source:MGI Symbol;Acc:MGI:1098727]
Anp32b	0.228808	7.40267e-115	0.512	0.279	1.39933e-110	0.564634	0.337753	acidic (leucine-rich) nuclear phosphoprotein 32 family, member B [Source:MGI Symbol;Acc:MGI:1914878]
Id2	0.228799	1.55963e-100	0.87	0.686	2.94817e-96	1.47096	1.13688	inhibitor of DNA binding 2 [Source:MGI Symbol;Acc:MGI:96397]
Uqcc2	0.228634	1.52569e-123	0.795	0.529	2.88402e-119	1.00764	0.699644	ubiquinol-cytochrome c reductase complex assembly factor 2 [Source:MGI Symbol;Acc:MGI:1914517]
Usmg5	0.228194	3.93594e-151	0.934	0.722	7.44011e-147	1.50435	1.13396	NA
Tk1	0.228166	4.6324e-197	0.154	0.009	8.75662e-193	0.149997	0.00981193	thymidine kinase 1 [Source:MGI Symbol;Acc:MGI:98763]
Ccdc167	0.227766	1.41072e-194	0.283	0.073	2.66669e-190	0.256579	0.0800023	coiled-coil domain containing 167 [Source:MGI Symbol;Acc:MGI:1915847]
H1f0	0.227733	4.77079e-76	0.59	0.382	9.01822e-72	0.742574	0.514653	H1 histone family, member 0 [Source:MGI Symbol;Acc:MGI:95893]
Fetub	0.227699	6.15561e-235	0.185	0.012	1.1636e-230	0.16499	0.0122683	fetuin beta [Source:MGI Symbol;Acc:MGI:1890221]
Lsm6	0.227599	1.31975e-134	0.555	0.291	2.49472e-130	0.59537	0.350056	LSM6 homolog, U6 small nuclear RNA and mRNA degradation associated [Source:MGI Symbol;Acc:MGI:1925901]
Krtcap2	0.227583	1.04314e-125	0.925	0.763	1.97185e-121	1.51432	1.19258	keratinocyte associated protein 2 [Source:MGI Symbol;Acc:MGI:1913309]
Tmem37	0.227084	1.67618e-157	0.406	0.168	3.16849e-153	0.407806	0.197307	transmembrane protein 37 [Source:MGI Symbol;Acc:MGI:2157899]
Emg1	0.227021	2.74223e-163	0.469	0.205	5.18363e-159	0.462702	0.236841	EMG1 N1-specific pseudouridine methyltransferase [Source:MGI Symbol;Acc:MGI:1315195]
Samhd1	0.227014	3.07938e-175	0.264	0.071	5.82096e-171	0.25062	0.0800995	SAM domain and HD domain, 1 [Source:MGI Symbol;Acc:MGI:1927468]
Smc4	0.226717	8.55335e-127	0.217	0.067	1.61684e-122	0.223684	0.0749751	structural maintenance of chromosomes 4 [Source:MGI Symbol;Acc:MGI:1917349]
Uqcrfs1	0.225879	1.07745e-129	0.636	0.365	2.03671e-125	0.710858	0.445156	ubiquinol-cytochrome c reductase, Rieske iron-sulfur polypeptide 1 [Source:MGI Symbol;Acc:MGI:1913944]
Prc1	0.225853	4.2806e-130	0.132	0.019	8.09162e-126	0.145955	0.021978	protein regulator of cytokinesis 1 [Source:MGI Symbol;Acc:MGI:1858961]
Abhd11	0.225418	1.72962e-166	0.442	0.184	3.2695e-162	0.428253	0.210929	abhydrolase domain containing 11 [Source:MGI Symbol;Acc:MGI:1916008]
Hint3	0.224602	1.04605e-157	0.442	0.189	1.97734e-153	0.432225	0.217122	histidine triad nucleotide binding protein 3 [Source:MGI Symbol;Acc:MGI:1914097]
Psma5	0.224448	1.00089e-147	0.495	0.233	1.89197e-143	0.500348	0.271609	proteasome (prosome, macropain) subunit, alpha type 5 [Source:MGI Symbol;Acc:MGI:1347009]
Chmp2a	0.224221	9.25892e-118	0.768	0.509	1.75021e-113	0.974739	0.676383	charged multivesicular body protein 2A [Source:MGI Symbol;Acc:MGI:1916203]
Tmem258	0.223661	1.14838e-117	0.897	0.702	2.17079e-113	1.3803	1.05755	transmembrane protein 258 [Source:MGI Symbol;Acc:MGI:1916288]
Ube2i	0.223064	2.84188e-111	0.768	0.514	5.372e-107	0.975862	0.682155	ubiquitin-conjugating enzyme E2I [Source:MGI Symbol;Acc:MGI:107365]
Tacstd2	0.222445	4.73937e-169	0.345	0.122	8.95883e-165	0.338668	0.14516	tumor-associated calcium signal transducer 2 [Source:MGI Symbol;Acc:MGI:1861606]
Cybrd1	0.221764	7.21975e-234	0.209	0.022	1.36475e-229	0.183066	0.0250878	cytochrome b reductase 1 [Source:MGI Symbol;Acc:MGI:2654575]
Ssr3	0.221606	1.66697e-148	0.48	0.223	3.15108e-144	0.485327	0.262354	signal sequence receptor, gamma [Source:MGI Symbol;Acc:MGI:1914687]
Commd3	0.221101	1.23465e-164	0.48	0.21	2.33385e-160	0.470975	0.244075	COMM domain containing 3 [Source:MGI Symbol;Acc:MGI:88218]
Psmd8	0.220647	1.00493e-105	0.648	0.391	1.89962e-101	0.737618	0.484846	proteasome (prosome, macropain) 26S subunit, non-ATPase, 8 [Source:MGI Symbol;Acc:MGI:1888669]
Snrpe	0.220347	2.01132e-98	0.755	0.522	3.80199e-94	0.972268	0.693846	small nuclear ribonucleoprotein E [Source:MGI Symbol;Acc:MGI:98346]
Ccdc34	0.219657	2.5339e-114	0.186	0.054	4.78982e-110	0.20241	0.0662539	coiled-coil domain containing 34 [Source:MGI Symbol;Acc:MGI:1915451]
Hmgb3	0.219508	1.19246e-170	0.375	0.138	2.2541e-166	0.35604	0.159264	high mobility group box 3 [Source:MGI Symbol;Acc:MGI:1098219]
Rbx1	0.219161	1.85249e-131	0.925	0.749	3.50177e-127	1.48996	1.16102	ring-box 1 [Source:MGI Symbol;Acc:MGI:1891829]
Mrpl46	0.218955	6.15151e-180	0.333	0.108	1.16282e-175	0.30099	0.116817	mitochondrial ribosomal protein L46 [Source:MGI Symbol;Acc:MGI:1914558]
Atp5d	0.218409	5.54844e-144	0.961	0.851	1.04882e-139	1.79167	1.47543	ATP synthase, H+ transporting, mitochondrial F1 complex, delta subunit [Source:MGI Symbol;Acc:MGI:1913293]
Gkn3	0.217811	1.54111e-99	0.241	0.095	2.91316e-95	0.264339	0.120767	gastrokine 3 [Source:MGI Symbol;Acc:MGI:1916138]
Tbrg1	0.21749	2.31516e-153	0.427	0.182	4.37635e-149	0.422621	0.21371	transforming growth factor beta regulated gene 1 [Source:MGI Symbol;Acc:MGI:1100877]
Utp11l	0.217387	2.47406e-161	0.351	0.129	4.67672e-157	0.334	0.146216	NA
Tmem208	0.217219	1.19234e-124	0.679	0.397	2.25387e-120	0.768196	0.496249	transmembrane protein 208 [Source:MGI Symbol;Acc:MGI:1913570]
Emp2	0.217198	7.28089e-98	0.72	0.48	1.37631e-93	0.91737	0.64333	epithelial membrane protein 2 [Source:MGI Symbol;Acc:MGI:1098726]
Sfn	0.216862	1.11477e-95	0.466	0.253	2.10726e-91	0.538541	0.34166	stratifin [Source:MGI Symbol;Acc:MGI:1891831]
Pgm2	0.2168	4.53184e-168	0.363	0.131	8.56654e-164	0.339236	0.148487	phosphoglucomutase 2 [Source:MGI Symbol;Acc:MGI:97564]
Ckap4	0.216343	1.6616e-171	0.272	0.077	3.14093e-167	0.255033	0.0876532	cytoskeleton-associated protein 4 [Source:MGI Symbol;Acc:MGI:2444926]
Rap1b	0.216327	2.47674e-120	0.592	0.329	4.68178e-116	0.641817	0.399192	RAS related protein 1b [Source:MGI Symbol;Acc:MGI:894315]
Eif1ax	0.216297	8.11055e-154	0.457	0.201	1.53314e-149	0.453228	0.236773	eukaryotic translation initiation factor 1A, X-linked [Source:MGI Symbol;Acc:MGI:1913485]
Ndufv3	0.215968	1.64923e-109	0.833	0.591	3.11754e-105	1.12787	0.821535	NADH:ubiquinone oxidoreductase core subunit V3 [Source:MGI Symbol;Acc:MGI:1890894]
Zbp1	0.215259	1.74326e-220	0.18	0.013	3.29528e-216	0.161873	0.0165068	Z-DNA binding protein 1 [Source:MGI Symbol;Acc:MGI:1927449]
Mrps9	0.214434	2.97391e-127	0.423	0.2	5.62158e-123	0.439933	0.238656	mitochondrial ribosomal protein S9 [Source:MGI Symbol;Acc:MGI:1916777]
Alad	0.214392	1.19972e-123	0.579	0.315	2.26784e-119	0.620822	0.380676	aminolevulinate, delta-, dehydratase [Source:MGI Symbol;Acc:MGI:96853]
Ndufa8	0.214013	2.50538e-117	0.692	0.419	4.73591e-113	0.795003	0.524664	NADH:ubiquinone oxidoreductase subunit A8 [Source:MGI Symbol;Acc:MGI:1915625]
Pdia6	0.213837	1.10266e-87	0.756	0.538	2.08436e-83	1.00863	0.738357	protein disulfide isomerase associated 6 [Source:MGI Symbol;Acc:MGI:1919103]
Shisa4	0.212681	9.88143e-180	0.21	0.04	1.86789e-175	0.191884	0.0439011	shisa family member 4 [Source:MGI Symbol;Acc:MGI:1924802]
Spcs2	0.212635	1.03617e-95	0.776	0.54	1.95867e-91	1.01893	0.736479	signal peptidase complex subunit 2 homolog (S. cerevisiae) [Source:MGI Symbol;Acc:MGI:1913874]
Pbld2	0.212063	1.47111e-193	0.201	0.031	2.78083e-189	0.179763	0.0330096	phenazine biosynthesis-like protein domain containing 2 [Source:MGI Symbol;Acc:MGI:1914557]
Cope	0.211452	4.58014e-96	0.692	0.451	8.65783e-92	0.832077	0.576081	coatomer protein complex, subunit epsilon [Source:MGI Symbol;Acc:MGI:1891702]
Ndufc2	0.211273	1.35825e-136	0.956	0.831	2.5675e-132	1.74172	1.42116	NADH:ubiquinone oxidoreductase subunit C2 [Source:MGI Symbol;Acc:MGI:1344370]
Slirp	0.209898	9.19903e-107	0.703	0.442	1.73889e-102	0.823705	0.558311	SRA stem-loop interacting RNA binding protein [Source:MGI Symbol;Acc:MGI:1916394]
Capzb	0.209759	2.59465e-117	0.562	0.308	4.90466e-113	0.60779	0.374662	capping protein (actin filament) muscle Z-line, beta [Source:MGI Symbol;Acc:MGI:104652]
Park7	0.20972	4.65502e-114	0.833	0.595	8.79939e-110	1.13142	0.826044	Parkinson disease (autosomal recessive, early onset) 7 [Source:MGI Symbol;Acc:MGI:2135637]
Snrpc	0.209679	2.39748e-149	0.452	0.199	4.53196e-145	0.445257	0.233641	U1 small nuclear ribonucleoprotein C [Source:MGI Symbol;Acc:MGI:109489]
Corin	0.209636	1.15318e-232	0.156	0.001	2.17987e-228	0.137136	0.000809927	corin, serine peptidase [Source:MGI Symbol;Acc:MGI:1349451]
Cd83	0.209074	4.09403e-142	0.151	0.024	7.73894e-138	0.149869	0.026192	CD83 antigen [Source:MGI Symbol;Acc:MGI:1328316]
Ptpn2	0.208849	1.31298e-183	0.251	0.06	2.48193e-179	0.22508	0.0656232	protein tyrosine phosphatase, non-receptor type 2 [Source:MGI Symbol;Acc:MGI:97806]
Pcx	0.208669	2.03853e-164	0.263	0.075	3.85342e-160	0.24345	0.0833775	pyruvate carboxylase [Source:MGI Symbol;Acc:MGI:97520]
Srsf3	0.208446	4.07805e-86	0.784	0.569	7.70875e-82	1.06056	0.788503	serine/arginine-rich splicing factor 3 [Source:MGI Symbol;Acc:MGI:98285]
Ppp1ca	0.208404	1.3348e-106	0.714	0.453	2.52318e-102	0.858514	0.586747	protein phosphatase 1 catalytic subunit alpha [Source:MGI Symbol;Acc:MGI:103016]
Cmc2	0.207848	3.43127e-142	0.295	0.105	6.48613e-138	0.282253	0.117062	COX assembly mitochondrial protein 2 [Source:MGI Symbol;Acc:MGI:1913781]
Tfrc	0.207611	5.42148e-109	0.484	0.257	1.02482e-104	0.527117	0.318345	transferrin receptor [Source:MGI Symbol;Acc:MGI:98822]
Mrpl32	0.207145	1.27815e-121	0.579	0.315	2.41609e-117	0.612243	0.377115	mitochondrial ribosomal protein L32 [Source:MGI Symbol;Acc:MGI:2137226]
Ormdl2	0.206886	4.56651e-139	0.496	0.237	8.63208e-135	0.498495	0.279522	ORM1-like 2 (S. cerevisiae) [Source:MGI Symbol;Acc:MGI:1914094]
Lsm12	0.206602	2.08456e-166	0.322	0.108	3.94045e-162	0.295865	0.120577	LSM12 homolog [Source:MGI Symbol;Acc:MGI:1919592]
Uqcrh	0.20655	2.21117e-148	0.986	0.926	4.17978e-144	2.12965	1.84084	ubiquinol-cytochrome c reductase hinge protein [Source:MGI Symbol;Acc:MGI:1913826]
Bola3	0.206545	3.8011e-134	0.639	0.351	7.18522e-130	0.708775	0.442958	bolA-like 3 (E. coli) [Source:MGI Symbol;Acc:MGI:1925903]
Spc25	0.206432	5.45525e-163	0.127	0.007	1.03121e-158	0.127864	0.00757949	SPC25, NDC80 kinetochore complex component, homolog (S. cerevisiae) [Source:MGI Symbol;Acc:MGI:1913692]
Sdhc	0.20637	1.68888e-121	0.553	0.298	3.19248e-117	0.57609	0.349542	succinate dehydrogenase complex, subunit C, integral membrane protein [Source:MGI Symbol;Acc:MGI:1913302]
Slc25a5	0.205998	5.43372e-133	0.89	0.693	1.02714e-128	1.4045	1.06824	solute carrier family 25 (mitochondrial carrier, adenine nucleotide translocator), member 5 [Source:MGI Symbol;Acc:MGI:1353496]
Gadd45g	0.20569	1.79662e-119	0.626	0.366	3.39615e-115	0.811392	0.531205	growth arrest and DNA-damage-inducible 45 gamma [Source:MGI Symbol;Acc:MGI:1346325]
Serf2	0.205657	2.02878e-163	0.995	0.96	3.83499e-159	2.39697	2.11433	small EDRK-rich factor 2 [Source:MGI Symbol;Acc:MGI:1337041]
Slc25a3	0.20536	5.34826e-103	0.884	0.711	1.01098e-98	1.35407	1.06252	solute carrier family 25 (mitochondrial carrier, phosphate carrier), member 3 [Source:MGI Symbol;Acc:MGI:1353498]
Atp6v0d1	0.204916	1.18005e-115	0.598	0.337	2.23065e-111	0.64641	0.408603	ATPase, H+ transporting, lysosomal V0 subunit D1 [Source:MGI Symbol;Acc:MGI:1201778]
Eif4e2	0.204907	1.13588e-147	0.384	0.156	2.14715e-143	0.364154	0.176371	eukaryotic translation initiation factor 4E member 2 [Source:MGI Symbol;Acc:MGI:1914440]
2020-03-05	0.204815	1.794e-147	0.425	0.183	3.39121e-143	0.41511	0.213984	membrane-associated ring finger (C3HC4) 5 [Source:MGI Symbol;Acc:MGI:1915207]
Eno1	0.204437	4.71729e-169	0.341	0.118	8.91709e-165	0.319671	0.136587	enolase 1, alpha non-neuron [Source:MGI Symbol;Acc:MGI:95393]
Tst	0.204389	2.37716e-108	0.696	0.444	4.49355e-104	0.858326	0.587456	thiosulfate sulfurtransferase, mitochondrial [Source:MGI Symbol;Acc:MGI:98852]
Pmepa1	0.204196	8.79628e-169	0.288	0.087	1.66276e-164	0.273402	0.103893	prostate transmembrane protein, androgen induced 1 [Source:MGI Symbol;Acc:MGI:1929600]
Bub3	0.204182	7.46991e-110	0.343	0.156	1.41204e-105	0.349238	0.18085	BUB3 mitotic checkpoint protein [Source:MGI Symbol;Acc:MGI:1343463]
Mrps36	0.203945	9.8005e-113	0.647	0.377	1.85259e-108	0.716603	0.466083	mitochondrial ribosomal protein S36 [Source:MGI Symbol;Acc:MGI:1913378]
Atp1b1	0.203917	3.25752e-103	0.971	0.898	6.15769e-99	2.07389	1.78756	ATPase, Na+/K+ transporting, beta 1 polypeptide [Source:MGI Symbol;Acc:MGI:88108]
Anxa5	0.203621	3.08812e-104	0.736	0.488	5.83748e-100	0.977536	0.687384	annexin A5 [Source:MGI Symbol;Acc:MGI:106008]
Smc2	0.203165	1.19222e-154	0.141	0.015	2.25366e-150	0.140538	0.0174044	structural maintenance of chromosomes 2 [Source:MGI Symbol;Acc:MGI:106067]
Ywhab	0.202868	2.57566e-121	0.563	0.302	4.86877e-117	0.602662	0.369873	tyrosine 3-monooxygenase/tryptophan 5-monooxygenase activation protein, beta polypeptide [Source:MGI Symbol;Acc:MGI:1891917]
Bsg	0.202736	2.69098e-135	0.979	0.917	5.08676e-131	2.03532	1.75795	basigin [Source:MGI Symbol;Acc:MGI:88208]
Pcbd1	0.202429	1.78125e-125	0.519	0.267	3.36709e-121	0.539464	0.319036	pterin 4 alpha carbinolamine dehydratase/dimerization cofactor of hepatocyte nuclear factor 1 alpha (TCF1) 1 [Source:MGI Symbol;Acc:MGI:94873]
Atrx	0.202198	3.17299e-109	0.521	0.283	5.9979e-105	0.554161	0.340828	ATRX, chromatin remodeler [Source:MGI Symbol;Acc:MGI:103067]
S100a14	0.201975	7.89405e-120	0.205	0.061	1.49221e-115	0.199756	0.0700913	S100 calcium binding protein A14 [Source:MGI Symbol;Acc:MGI:1913416]
Plp2	0.201277	9.00831e-95	0.6	0.366	1.70284e-90	0.700895	0.467663	proteolipid protein 2 [Source:MGI Symbol;Acc:MGI:1298382]
Ndufa7	0.200804	5.31144e-132	0.978	0.888	1.00402e-127	1.96017	1.66117	NADH:ubiquinone oxidoreductase subunit A7 [Source:MGI Symbol;Acc:MGI:1913666]
Ndufa9	0.200689	8.00849e-143	0.411	0.177	1.51384e-138	0.391767	0.199817	NADH:ubiquinone oxidoreductase subunit A9 [Source:MGI Symbol;Acc:MGI:1913358]
Malt1	0.200671	7.84063e-199	0.17	0.015	1.48211e-194	0.15009	0.0159255	MALT1 paracaspase [Source:MGI Symbol;Acc:MGI:2445027]
Timm13	0.200597	9.79146e-99	0.88	0.664	1.85088e-94	1.25688	0.958342	translocase of inner mitochondrial membrane 13 [Source:MGI Symbol;Acc:MGI:1353432]
Bmp4	0.200139	1.01799e-122	0.412	0.192	1.9243e-118	0.414686	0.226008	bone morphogenetic protein 4 [Source:MGI Symbol;Acc:MGI:88180]
Tcn2	0.200022	2.60152e-131	0.395	0.175	4.91765e-127	0.382635	0.198418	transcobalamin 2 [Source:MGI Symbol;Acc:MGI:98534]
Rfc4	0.198542	1.02211e-183	0.191	0.029	1.93209e-179	0.170433	0.031679	replication factor C (activator 1) 4 [Source:MGI Symbol;Acc:MGI:2146571]
Pmf1	0.198317	4.36725e-137	0.225	0.066	8.25542e-133	0.214294	0.0722251	polyamine-modulated factor 1 [Source:MGI Symbol;Acc:MGI:1914287]
Anxa4	0.198233	5.49876e-105	0.677	0.415	1.03943e-100	0.781822	0.526618	annexin A4 [Source:MGI Symbol;Acc:MGI:88030]
Ppib	0.198193	2.34803e-100	0.942	0.816	4.43849e-96	1.65915	1.37198	peptidylprolyl isomerase B [Source:MGI Symbol;Acc:MGI:97750]
Krt8	0.198079	7.52407e-111	0.735	0.481	1.42227e-106	1.03359	0.72523	keratin 8 [Source:MGI Symbol;Acc:MGI:96705]
Mrpl54	0.197344	4.38814e-103	0.692	0.424	8.29489e-99	0.793385	0.536603	mitochondrial ribosomal protein L54 [Source:MGI Symbol;Acc:MGI:1913297]
Col14a1	0.197328	1.35724e-165	0.12	0.003	2.5656e-161	0.118908	0.00454068	collagen, type XIV, alpha 1 [Source:MGI Symbol;Acc:MGI:1341272]
Mrps18c	0.197175	2.55062e-122	0.539	0.282	4.82145e-118	0.550878	0.331265	mitochondrial ribosomal protein S18C [Source:MGI Symbol;Acc:MGI:1915985]
Cish	0.196945	8.24309e-166	0.233	0.057	1.55819e-161	0.209948	0.0630988	cytokine inducible SH2-containing protein [Source:MGI Symbol;Acc:MGI:103159]
Serbp1	0.196693	4.95075e-86	0.749	0.522	9.35839e-82	0.948773	0.690715	serpine1 mRNA binding protein 1 [Source:MGI Symbol;Acc:MGI:1914120]
Tceb1	0.196558	8.20136e-110	0.617	0.353	1.5503e-105	0.675822	0.436584	NA
Vps29	0.196234	1.73661e-137	0.466	0.217	3.28271e-133	0.456839	0.252033	VPS29 retromer complex component [Source:MGI Symbol;Acc:MGI:1928344]
Nucks1	0.195913	8.42683e-61	0.513	0.334	1.59292e-56	0.58971	0.408886	nuclear casein kinase and cyclin-dependent kinase substrate 1 [Source:MGI Symbol;Acc:MGI:1934811]
Cdca8	0.195814	6.51707e-153	0.125	0.008	1.23192e-148	0.12641	0.00982135	cell division cycle associated 8 [Source:MGI Symbol;Acc:MGI:1196274]
Atpif1	0.195454	3.5245e-186	0.977	0.873	6.66235e-182	1.9765	1.62214	ATPase inhibitory factor 1 [Source:MGI Symbol;Acc:MGI:1196457]
Nmt1	0.194964	3.77088e-117	0.553	0.298	7.1281e-113	0.581662	0.358476	N-myristoyltransferase 1 [Source:MGI Symbol;Acc:MGI:102579]
Tmed2	0.194883	1.22335e-90	0.762	0.524	2.31251e-86	0.966589	0.699956	transmembrane p24 trafficking protein 2 [Source:MGI Symbol;Acc:MGI:1929269]
Aldh1a7	0.194771	4.18215e-137	0.414	0.183	7.90552e-133	0.399362	0.209929	aldehyde dehydrogenase family 1, subfamily A7 [Source:MGI Symbol;Acc:MGI:1347050]
Bola2	0.194385	1.43088e-138	0.541	0.27	2.70479e-134	0.559544	0.329392	bolA-like 2 (E. coli) [Source:MGI Symbol;Acc:MGI:1913412]
Lamtor5	0.194192	1.11099e-105	0.65	0.391	2.10011e-101	0.721985	0.478914	late endosomal/lysosomal adaptor, MAPK and MTOR activator 5 [Source:MGI Symbol;Acc:MGI:1915826]
H1fx	0.193912	1.61628e-145	0.144	0.019	3.05526e-141	0.144649	0.0239162	H1 histone family, member X [Source:MGI Symbol;Acc:MGI:2685307]
Arpc5l	0.193346	7.72718e-134	0.481	0.23	1.46067e-129	0.477984	0.269825	actin related protein 2/3 complex, subunit 5-like [Source:MGI Symbol;Acc:MGI:1921442]
Nme2	0.192996	3.13433e-125	0.466	0.226	5.92482e-121	0.462811	0.263335	NME/NM23 nucleoside diphosphate kinase 2 [Source:MGI Symbol;Acc:MGI:97356]
Ufm1	0.192853	2.2836e-135	0.437	0.199	4.31669e-131	0.430189	0.23392	ubiquitin-fold modifier 1 [Source:MGI Symbol;Acc:MGI:1915140]
H2afx	0.192136	4.53655e-110	0.199	0.063	8.57544e-106	0.196989	0.0709932	H2A histone family, member X [Source:MGI Symbol;Acc:MGI:102688]
Rab27b	0.192038	4.02141e-120	0.52	0.271	7.60167e-116	0.539087	0.324516	RAB27B, member RAS oncogene family [Source:MGI Symbol;Acc:MGI:1931295]
Plb1	0.191287	2.56375e-137	0.171	0.035	4.84625e-133	0.163111	0.0394045	phospholipase B1 [Source:MGI Symbol;Acc:MGI:1922406]
Sdc4	0.191192	1.27577e-65	0.904	0.759	2.41158e-61	1.51775	1.25185	syndecan 4 [Source:MGI Symbol;Acc:MGI:1349164]
Eif4e	0.190833	3.4107e-142	0.412	0.176	6.44725e-138	0.392515	0.203421	eukaryotic translation initiation factor 4E [Source:MGI Symbol;Acc:MGI:95305]
Azin1	0.190422	8.11829e-102	0.564	0.319	1.5346e-97	0.614804	0.396	antizyme inhibitor 1 [Source:MGI Symbol;Acc:MGI:1859169]
Psmd14	0.190409	4.6756e-147	0.307	0.108	8.83829e-143	0.277742	0.117969	proteasome (prosome, macropain) 26S subunit, non-ATPase, 14 [Source:MGI Symbol;Acc:MGI:1913284]
Snx3	0.190202	4.7317e-106	0.662	0.399	8.94433e-102	0.75249	0.503033	sorting nexin 3 [Source:MGI Symbol;Acc:MGI:1860188]
Cxcl16	0.189603	6.96238e-96	0.379	0.189	1.3161e-91	0.387938	0.222917	chemokine (C-X-C motif) ligand 16 [Source:MGI Symbol;Acc:MGI:1932682]
1700097N02Rik	0.189284	3.21349e-173	0.127	0.004	6.07445e-169	0.119515	0.00448125	RIKEN cDNA 1700097N02 gene [Source:MGI Symbol;Acc:MGI:1914772]
Hnrnpa3	0.189002	3.84604e-81	0.768	0.551	7.27016e-77	1.01223	0.753809	heterogeneous nuclear ribonucleoprotein A3 [Source:MGI Symbol;Acc:MGI:1917171]
Lman1	0.18893	1.22462e-136	0.362	0.149	2.3149e-132	0.3411	0.168115	lectin, mannose-binding, 1 [Source:MGI Symbol;Acc:MGI:1917611]
Eif5b	0.188501	3.74934e-102	0.645	0.388	7.08737e-98	0.735978	0.493458	eukaryotic translation initiation factor 5B [Source:MGI Symbol;Acc:MGI:2441772]
Ccdc25	0.18822	3.7235e-155	0.284	0.09	7.03853e-151	0.255131	0.0996306	coiled-coil domain containing 25 [Source:MGI Symbol;Acc:MGI:1914429]
Dhrs4	0.188068	1.28592e-147	0.327	0.119	2.43078e-143	0.297662	0.132295	dehydrogenase/reductase (SDR family) member 4 [Source:MGI Symbol;Acc:MGI:90169]
Gstt1	0.188019	3.73798e-82	0.76	0.525	7.0659e-78	0.977099	0.715987	glutathione S-transferase, theta 1 [Source:MGI Symbol;Acc:MGI:107379]
Tspan4	0.187862	5.52743e-171	0.202	0.038	1.04485e-166	0.178426	0.0424723	tetraspanin 4 [Source:MGI Symbol;Acc:MGI:1928097]
Rab9	0.187829	2.65532e-93	0.624	0.377	5.01936e-89	0.692886	0.466535	RAB9, member RAS oncogene family [Source:MGI Symbol;Acc:MGI:1890695]
Ndufb2	0.187708	2.01468e-94	0.901	0.713	3.80835e-90	1.3733	1.08032	NADH:ubiquinone oxidoreductase subunit B2 [Source:MGI Symbol;Acc:MGI:1915448]
Tbcb	0.187558	3.75281e-111	0.54	0.29	7.09394e-107	0.556008	0.344669	tubulin folding cofactor B [Source:MGI Symbol;Acc:MGI:1913661]
Abracl	0.187377	3.22988e-108	0.513	0.276	6.10544e-104	0.531752	0.327073	ABRA C-terminal like [Source:MGI Symbol;Acc:MGI:1920362]
Mpc1	0.186362	6.59416e-141	0.854	0.604	1.24649e-136	1.21492	0.879449	mitochondrial pyruvate carrier 1 [Source:MGI Symbol;Acc:MGI:1915240]
Steap2	0.186129	2.98241e-142	0.26	0.082	5.63765e-138	0.23895	0.0921565	six transmembrane epithelial antigen of prostate 2 [Source:MGI Symbol;Acc:MGI:1921301]
Haus7	0.186085	1.03235e-158	0.26	0.074	1.95145e-154	0.229707	0.081274	HAUS augmin-like complex, subunit 7 [Source:MGI Symbol;Acc:MGI:1920988]
Atp5a1	0.185987	4.20613e-83	0.812	0.603	7.95085e-79	1.09951	0.835052	ATP synthase, H+ transporting, mitochondrial F1 complex, alpha subunit 1 [Source:MGI Symbol;Acc:MGI:88115]
Sdhd	0.185793	1.92436e-126	0.455	0.217	3.63762e-122	0.44634	0.251777	succinate dehydrogenase complex, subunit D, integral membrane protein [Source:MGI Symbol;Acc:MGI:1914175]
Txnl1	0.185592	1.58951e-117	0.465	0.231	3.00464e-113	0.467893	0.272683	thioredoxin-like 1 [Source:MGI Symbol;Acc:MGI:1860078]
Hnrnpa2b1	0.185286	1.4594e-75	0.824	0.619	2.75871e-71	1.13975	0.877564	heterogeneous nuclear ribonucleoprotein A2/B1 [Source:MGI Symbol;Acc:MGI:104819]
Zfp385b	0.185045	5.26247e-152	0.245	0.069	9.94764e-148	0.219352	0.0760664	zinc finger protein 385B [Source:MGI Symbol;Acc:MGI:2444734]
Cd47	0.184947	1.89535e-73	0.613	0.392	3.58277e-69	0.703856	0.49363	CD47 antigen (Rh-related antigen, integrin-associated signal transducer) [Source:MGI Symbol;Acc:MGI:96617]
Arpp19	0.184484	1.83508e-80	0.822	0.609	3.46886e-76	1.11836	0.852315	cAMP-regulated phosphoprotein 19 [Source:MGI Symbol;Acc:MGI:1891691]
Lgals3bp	0.184283	1.21177e-159	0.236	0.06	2.29061e-155	0.217072	0.0732086	lectin, galactoside-binding, soluble, 3 binding protein [Source:MGI Symbol;Acc:MGI:99554]
Eif6	0.184078	2.67321e-110	0.445	0.223	5.05317e-106	0.441188	0.256943	eukaryotic translation initiation factor 6 [Source:MGI Symbol;Acc:MGI:1196288]
Ndufa1	0.184066	3.12534e-88	0.83	0.596	5.90784e-84	1.10202	0.824664	NADH:ubiquinone oxidoreductase subunit A1 [Source:MGI Symbol;Acc:MGI:1929511]
Pdzk1ip1	0.183783	3.60544e-85	0.625	0.392	6.81535e-81	0.725411	0.501763	PDZK1 interacting protein 1 [Source:MGI Symbol;Acc:MGI:1914432]
Spint2	0.183654	4.50129e-95	0.962	0.873	8.50879e-91	1.82032	1.55715	serine protease inhibitor, Kunitz type 2 [Source:MGI Symbol;Acc:MGI:1338031]
Ptp4a2	0.183614	1.57906e-102	0.566	0.32	2.98489e-98	0.606325	0.390198	protein tyrosine phosphatase 4a2 [Source:MGI Symbol;Acc:MGI:1277117]
Ecscr	0.183567	2.33697e-199	0.147	0.005	4.41757e-195	0.126271	0.00557291	endothelial cell surface expressed chemotaxis and apoptosis regulator [Source:MGI Symbol;Acc:MGI:1915795]
Pcolce	0.183478	1.03786e-209	0.241	0.044	1.96187e-205	0.223193	0.0613967	procollagen C-endopeptidase enhancer protein [Source:MGI Symbol;Acc:MGI:105099]
Npr1	-0.182464	9.85647e-24	0.146	0.195	1.86317e-19	0.127122	0.227092	natriuretic peptide receptor 1 [Source:MGI Symbol;Acc:MGI:97371]
Serf1	-0.184824	3.90814e-22	0.14	0.188	7.38755e-18	0.125861	0.224538	small EDRK-rich factor 1 [Source:MGI Symbol;Acc:MGI:1337114]
Yae1d1	-0.185579	1.05214e-12	0.341	0.336	1.98886e-08	0.315677	0.413696	Yae1 domain containing 1 [Source:MGI Symbol;Acc:MGI:1914258]
Pde4d	-0.186025	3.72651e-20	0.132	0.175	7.04423e-16	0.113904	0.209856	phosphodiesterase 4D, cAMP specific [Source:MGI Symbol;Acc:MGI:99555]
Pttg1	-0.18708	1.07337e-07	0.376	0.351	0.002029	0.353857	0.439959	pituitary tumor-transforming gene 1 [Source:MGI Symbol;Acc:MGI:1353578]
Rprm	-0.187453	1.10982e-20	0.166	0.209	2.0979e-16	0.147637	0.24832	reprimo, TP53 dependent G2 arrest mediator candidate [Source:MGI Symbol;Acc:MGI:1915124]
Vldlr	-0.187497	2.04297e-59	0.053	0.131	3.86182e-55	0.0475219	0.151265	very low density lipoprotein receptor [Source:MGI Symbol;Acc:MGI:98935]
Cdh1	-0.187531	1.15988e-14	0.483	0.45	2.19252e-10	0.490603	0.589876	cadherin 1 [Source:MGI Symbol;Acc:MGI:88354]
Irf2bp2	-0.187802	1.73423e-10	0.348	0.34	3.27822e-06	0.332963	0.428877	interferon regulatory factor 2 binding protein 2 [Source:MGI Symbol;Acc:MGI:2443921]
Wdr89	-0.188158	4.12478e-40	0.804	0.748	7.79706e-36	1.05247	1.16252	WD repeat domain 89 [Source:MGI Symbol;Acc:MGI:1919588]
Dpysl2	-0.189139	3.11527e-10	0.165	0.19	5.8888e-06	0.155266	0.239763	dihydropyrimidinase-like 2 [Source:MGI Symbol;Acc:MGI:1349763]
Mlc1	-0.190299	3.57629e-16	0.416	0.406	6.76026e-12	0.407358	0.51215	megalencephalic leukoencephalopathy with subcortical cysts 1 homolog (human) [Source:MGI Symbol;Acc:MGI:2157910]
Rps12-ps3	-0.190866	2.13254e-18	0.548	0.504	4.03115e-14	0.570073	0.670238	ribosomal protein S12, pseudogene 3 [Source:MGI Symbol;Acc:MGI:3704503]
Irx2	-0.190908	4.01692e-12	0.343	0.34	7.59317e-08	0.32463	0.424432	Iroquois homeobox 2 [Source:MGI Symbol;Acc:MGI:1197526]
Rac3	-0.191438	3.25787e-10	0.267	0.275	6.15835e-06	0.242196	0.336433	Rac family small GTPase 3 [Source:MGI Symbol;Acc:MGI:2180784]
Traf1	-0.191655	5.97373e-39	0.095	0.162	1.12922e-34	0.0824185	0.187865	TNF receptor-associated factor 1 [Source:MGI Symbol;Acc:MGI:101836]
Mmp15	-0.192058	8.26004e-18	0.205	0.239	1.5614e-13	0.183057	0.285797	matrix metallopeptidase 15 [Source:MGI Symbol;Acc:MGI:109320]
Ppp1r15a	-0.192104	3.13244e-37	0.098	0.164	5.92124e-33	0.0864773	0.191372	protein phosphatase 1, regulatory subunit 15A [Source:MGI Symbol;Acc:MGI:1927072]
Rpl36a	-0.192295	2.95324e-132	0.993	0.982	5.58251e-128	2.33153	2.49472	ribosomal protein L36A [Source:MGI Symbol;Acc:MGI:1201789]
Rpl37a	-0.192309	2.83974e-235	1	0.999	5.36796e-231	3.4358	3.60657	ribosomal protein L37a [Source:MGI Symbol;Acc:MGI:98068]
Fgf1	-0.193139	1.32917e-42	0.087	0.156	2.51252e-38	0.0736347	0.180565	fibroblast growth factor 1 [Source:MGI Symbol;Acc:MGI:95515]
Rps19	-0.193988	2.85952e-242	1	0.999	5.40535e-238	3.85214	4.00748	ribosomal protein S19 [Source:MGI Symbol;Acc:MGI:1333780]
Plet1	-0.194138	4.36283e-34	0.056	0.111	8.24706e-30	0.0518595	0.142764	placenta expressed transcript 1 [Source:MGI Symbol;Acc:MGI:1923759]
Fabp12	-0.194141	7.04558e-36	0.108	0.173	1.33183e-31	0.0937149	0.200436	fatty acid binding protein 12 [Source:MGI Symbol;Acc:MGI:1922747]
Tmem59	-0.194261	1.22173e-49	0.814	0.775	2.30944e-45	1.10441	1.23263	transmembrane protein 59 [Source:MGI Symbol;Acc:MGI:1929278]
Srebf1	-0.196561	6.65195e-32	0.131	0.192	1.25742e-27	0.113953	0.222953	sterol regulatory element binding transcription factor 1 [Source:MGI Symbol;Acc:MGI:107606]
Cadm1	-0.196689	7.37473e-18	0.539	0.502	1.39404e-13	0.568093	0.672688	cell adhesion molecule 1 [Source:MGI Symbol;Acc:MGI:1889272]
Bri3	-0.196738	1.3831e-71	0.951	0.921	2.61448e-67	1.66105	1.80526	brain protein I3 [Source:MGI Symbol;Acc:MGI:1933174]
Rpl30	-0.197303	6.09154e-124	0.99	0.979	1.15148e-119	2.19692	2.36044	ribosomal protein L30 [Source:MGI Symbol;Acc:MGI:98037]
Fgfr2	-0.197539	2.70616e-13	0.487	0.45	5.11546e-09	0.497189	0.596358	fibroblast growth factor receptor 2 [Source:MGI Symbol;Acc:MGI:95523]
Ddrgk1	-0.197613	1.07585e-22	0.461	0.447	2.03368e-18	0.450815	0.565053	DDRGK domain containing 1 [Source:MGI Symbol;Acc:MGI:1924256]
Rpl23a-ps3	-0.197808	6.32092e-19	0.526	0.488	1.19484e-14	0.534597	0.639313	ribosomal protein L23A, pseudogene 3 [Source:MGI Symbol;Acc:MGI:3781353]
Rsrp1	-0.198177	5.60844e-18	0.583	0.529	1.06016e-13	0.624649	0.72493	arginine/serine rich protein 1 [Source:MGI Symbol;Acc:MGI:106498]
Itm2b	-0.198817	2.21414e-70	0.934	0.917	4.18539e-66	1.63251	1.78863	integral membrane protein 2B [Source:MGI Symbol;Acc:MGI:1309517]
Psap	-0.198998	8.3554e-19	0.135	0.178	1.57942e-14	0.12368	0.221822	prosaposin [Source:MGI Symbol;Acc:MGI:97783]
Tra2b	-0.199083	1.99189e-12	0.533	0.489	3.76527e-08	0.570354	0.662728	transformer 2 beta [Source:MGI Symbol;Acc:MGI:106016]
Ing2	-0.200174	2.32122e-28	0.141	0.196	4.38781e-24	0.120747	0.230008	inhibitor of growth family, member 2 [Source:MGI Symbol;Acc:MGI:1916510]
Clstn1	-0.20109	3.59878e-19	0.23	0.264	6.80277e-15	0.209884	0.319894	calsyntenin 1 [Source:MGI Symbol;Acc:MGI:1929895]
Smpdl3a	-0.202324	1.02292e-25	0.171	0.222	1.93363e-21	0.150045	0.261505	sphingomyelin phosphodiesterase, acid-like 3A [Source:MGI Symbol;Acc:MGI:1931437]
Rps15	-0.202376	3.23245e-203	0.998	0.997	6.11031e-199	2.83411	3.02081	ribosomal protein S15 [Source:MGI Symbol;Acc:MGI:98117]
Rps14	-0.202483	1.15879e-241	0.999	0.998	2.19046e-237	3.31913	3.50184	ribosomal protein S14 [Source:MGI Symbol;Acc:MGI:98107]
Exosc7	-0.203035	1.79543e-30	0.671	0.622	3.39391e-26	0.784086	0.901624	exosome component 7 [Source:MGI Symbol;Acc:MGI:1913696]
Dnase2a	-0.203547	5.50963e-25	0.192	0.241	1.04149e-20	0.174367	0.287707	deoxyribonuclease II alpha [Source:MGI Symbol;Acc:MGI:1329019]
Gm9843	-0.205067	1.80711e-42	0.771	0.708	3.41598e-38	0.953451	1.07105	predicted gene 9843 [Source:MGI Symbol;Acc:MGI:3708621]
F3	-0.205321	1.7845e-63	0.05	0.13	3.37325e-59	0.0530188	0.16511	coagulation factor III [Source:MGI Symbol;Acc:MGI:88381]
Mgst1	-0.205559	1.73383e-82	0.94	0.921	3.27745e-78	1.72994	1.89292	microsomal glutathione S-transferase 1 [Source:MGI Symbol;Acc:MGI:1913850]
Tsc22d3	-0.206583	1.41931e-06	0.324	0.31	0.0268293	0.309714	0.399481	TSC22 domain family, member 3 [Source:MGI Symbol;Acc:MGI:1196284]
Pink1	-0.206627	1.37203e-43	0.102	0.173	2.59354e-39	0.0871914	0.202363	PTEN induced putative kinase 1 [Source:MGI Symbol;Acc:MGI:1916193]
8430408G22Rik	-0.20705	9.26094e-17	0.143	0.184	1.75059e-12	0.137307	0.234655	NA
Gabarapl1	-0.207198	7.35215e-30	0.117	0.175	1.38978e-25	0.105201	0.214063	gamma-aminobutyric acid (GABA) A receptor-associated protein-like 1 [Source:MGI Symbol;Acc:MGI:1914980]
Mid1ip1	-0.208242	1.88659e-22	0.766	0.714	3.56623e-18	1.10414	1.21796	Mid1 interacting protein 1 (gastrulation specific G12-like (zebrafish)) [Source:MGI Symbol;Acc:MGI:1915291]
Limch1	-0.208471	1.61618e-12	0.167	0.197	3.05506e-08	0.157049	0.249219	LIM and calponin homology domains 1 [Source:MGI Symbol;Acc:MGI:1924819]
Tcp11l2	-0.20907	1.72949e-60	0.069	0.151	3.26926e-56	0.0593682	0.175917	t-complex 11 (mouse) like 2 [Source:MGI Symbol;Acc:MGI:2444679]
Tmem205	-0.209474	6.02781e-25	0.533	0.505	1.13944e-20	0.550467	0.669189	transmembrane protein 205 [Source:MGI Symbol;Acc:MGI:3045495]
Bex1	-0.20964	2.0059e-25	0.097	0.147	3.79176e-21	0.0845096	0.183111	brain expressed X-linked 1 [Source:MGI Symbol;Acc:MGI:1328321]
Gsta3	-0.210209	2.35465e-41	0.082	0.148	4.451e-37	0.0692262	0.176733	glutathione S-transferase, alpha 3 [Source:MGI Symbol;Acc:MGI:95856]
Creg1	-0.210225	1.00627e-37	0.667	0.622	1.90215e-33	0.755483	0.880067	cellular repressor of E1A-stimulated genes 1 [Source:MGI Symbol;Acc:MGI:1344382]
Aldh6a1	-0.210527	2.61338e-58	0.075	0.156	4.94008e-54	0.0631265	0.180621	aldehyde dehydrogenase family 6, subfamily A1 [Source:MGI Symbol;Acc:MGI:1915077]
Hspa4l	-0.210754	6.24762e-07	0.139	0.157	0.0118099	0.126968	0.21002	heat shock protein 4 like [Source:MGI Symbol;Acc:MGI:107422]
Clk1	-0.211977	1.7776e-22	0.209	0.251	3.3602e-18	0.187121	0.302415	CDC-like kinase 1 [Source:MGI Symbol;Acc:MGI:107403]
Sec14l4	-0.213	1.58854e-48	0.105	0.182	3.00281e-44	0.0884588	0.209288	SEC14-like lipid binding 4 [Source:MGI Symbol;Acc:MGI:2144095]
Adgrf5	-0.213102	1.36772e-23	0.544	0.511	2.5854e-19	0.570668	0.688872	adhesion G protein-coupled receptor F5 [Source:MGI Symbol;Acc:MGI:2182928]
Ctsl	-0.213114	8.02873e-18	0.247	0.278	1.51767e-13	0.23047	0.341921	cathepsin L [Source:MGI Symbol;Acc:MGI:88564]
Gde1	-0.215181	2.56217e-57	0.794	0.756	4.84328e-53	1.04921	1.20081	glycerophosphodiester phosphodiesterase 1 [Source:MGI Symbol;Acc:MGI:1891827]
Slc6a6	-0.217009	1.25889e-38	0.122	0.19	2.37968e-34	0.10807	0.226965	solute carrier family 6 (neurotransmitter transporter, taurine), member 6 [Source:MGI Symbol;Acc:MGI:98488]
S100g	-0.21764	1.31701e-70	0.984	0.967	2.48954e-66	2.87453	3.07419	S100 calcium binding protein G [Source:MGI Symbol;Acc:MGI:104528]
Slc25a51	-0.217904	1.06934e-22	0.3	0.328	2.02137e-18	0.277613	0.40151	solute carrier family 25, member 51 [Source:MGI Symbol;Acc:MGI:2684984]
Spop	-0.219157	1.02077e-20	0.195	0.234	1.92956e-16	0.172572	0.287056	speckle-type BTB/POZ protein [Source:MGI Symbol;Acc:MGI:1343085]
Son	-0.219296	2.25764e-45	0.751	0.705	4.26762e-41	0.925478	1.05896	Son DNA binding protein [Source:MGI Symbol;Acc:MGI:98353]
Secisbp2l	-0.219736	6.47236e-20	0.37	0.379	1.22347e-15	0.361929	0.485528	SECIS binding protein 2-like [Source:MGI Symbol;Acc:MGI:1917604]
Lpl	-0.220384	6.84661e-53	0.095	0.176	1.29422e-48	0.085064	0.21029	lipoprotein lipase [Source:MGI Symbol;Acc:MGI:96820]
Rpl14	-0.220414	1.20906e-211	0.997	0.994	2.28549e-207	2.70819	2.90505	ribosomal protein L14 [Source:MGI Symbol;Acc:MGI:1914365]
Grcc10	-0.221335	3.694e-34	0.594	0.565	6.98277e-30	0.635312	0.767525	gene rich cluster, C10 gene [Source:MGI Symbol;Acc:MGI:1315201]
Rpl37	-0.222662	2.47677e-272	0.999	0.998	4.68183e-268	3.12208	3.33965	ribosomal protein L37 [Source:MGI Symbol;Acc:MGI:1914531]
Lrrc51	-0.223022	1.44044e-13	0.078	0.111	2.72287e-09	0.073928	0.157557	leucine rich repeat containing 51 [Source:MGI Symbol;Acc:MGI:1916608]
Ccnl1	-0.223771	9.54969e-21	0.23	0.263	1.80518e-16	0.202936	0.321239	cyclin L1 [Source:MGI Symbol;Acc:MGI:1922664]
Itm2c	-0.225019	4.56072e-20	0.381	0.385	8.62112e-16	0.363633	0.484714	integral membrane protein 2C [Source:MGI Symbol;Acc:MGI:1927594]
Slc38a2	-0.225662	3.19865e-42	0.142	0.215	6.04641e-38	0.12472	0.254497	solute carrier family 38, member 2 [Source:MGI Symbol;Acc:MGI:1915010]
Fam129b	-0.226279	7.96771e-31	0.204	0.258	1.50614e-26	0.18108	0.309397	family with sequence similarity 129, member B [Source:MGI Symbol;Acc:MGI:2442910]
Foxa1	-0.226718	3.76456e-38	0.151	0.218	7.11614e-34	0.130563	0.257888	forkhead box A1 [Source:MGI Symbol;Acc:MGI:1347472]
Ppp1r9a	-0.227136	9.57063e-27	0.309	0.338	1.80914e-22	0.284227	0.416286	protein phosphatase 1, regulatory subunit 9A [Source:MGI Symbol;Acc:MGI:2442401]
Rpl21	-0.227852	0	1	1	0	3.49436	3.69923	ribosomal protein L21 [Source:MGI Symbol;Acc:MGI:1278340]
Adgrg1	-0.228312	1.23663e-34	0.199	0.258	2.3376e-30	0.173245	0.304907	adhesion G protein-coupled receptor G1 [Source:MGI Symbol;Acc:MGI:1340051]
Por	-0.229195	2.25819e-27	0.292	0.33	4.26865e-23	0.277329	0.412217	P450 (cytochrome) oxidoreductase [Source:MGI Symbol;Acc:MGI:97744]
Serinc3	-0.231275	1.22586e-25	0.288	0.322	2.31724e-21	0.266806	0.398998	serine incorporator 3 [Source:MGI Symbol;Acc:MGI:1349457]
Rpl18a	-0.231689	2.34615e-306	1	0.998	4.43492e-302	3.2035	3.42265	ribosomal protein L18A [Source:MGI Symbol;Acc:MGI:1924058]
Brd2	-0.231734	1.88965e-26	0.271	0.308	3.572e-22	0.247153	0.3789	bromodomain containing 2 [Source:MGI Symbol;Acc:MGI:99495]
1810010H24Rik	-0.233217	3.79481e-78	0.052	0.143	7.17334e-74	0.0451021	0.171516	RIKEN cDNA 1810010H24 gene [Source:MGI Symbol;Acc:MGI:1916316]
Pgrmc1	-0.23333	1.10091e-26	0.058	0.105	2.08106e-22	0.0532659	0.147819	progesterone receptor membrane component 1 [Source:MGI Symbol;Acc:MGI:1858305]
Adck4	-0.23336	5.87361e-34	0.227	0.281	1.11029e-29	0.198906	0.334893	NA
App	-0.235994	1.23165e-54	0.76	0.72	2.3282e-50	0.953886	1.10726	amyloid beta (A4) precursor protein [Source:MGI Symbol;Acc:MGI:88059]
Sod1	-0.237206	9.66004e-34	0.586	0.554	1.82604e-29	0.628607	0.766035	superoxide dismutase 1, soluble [Source:MGI Symbol;Acc:MGI:98351]
Sox4	-0.239609	9.75114e-23	0.201	0.247	1.84326e-18	0.193386	0.318184	SRY (sex determining region Y)-box 4 [Source:MGI Symbol;Acc:MGI:98366]
Rpl7	-0.240941	1.61696e-215	0.992	0.988	3.05654e-211	2.36253	2.58464	ribosomal protein L7 [Source:MGI Symbol;Acc:MGI:98073]
Emb	-0.242169	2.25908e-45	0.607	0.591	4.27034e-41	0.663249	0.816494	embigin [Source:MGI Symbol;Acc:MGI:95321]
Zbtb20	-0.242243	6.26052e-20	0.284	0.309	1.18343e-15	0.268381	0.397434	zinc finger and BTB domain containing 20 [Source:MGI Symbol;Acc:MGI:1929213]
Per1	-0.244308	3.52085e-67	0.096	0.19	6.65547e-63	0.082198	0.222705	period circadian clock 1 [Source:MGI Symbol;Acc:MGI:1098283]
Rpl36	-0.246945	8.88301e-269	0.999	0.993	1.67916e-264	2.73121	2.95506	ribosomal protein L36 [Source:MGI Symbol;Acc:MGI:1860603]
Nrn1	-0.247672	2.19938e-13	0.157	0.19	4.15749e-09	0.162923	0.271888	neuritin 1 [Source:MGI Symbol;Acc:MGI:1915654]
Ahnak	-0.250044	2.0933e-37	0.217	0.28	3.95696e-33	0.201683	0.34746	AHNAK nucleoprotein (desmoyokin) [Source:MGI Symbol;Acc:MGI:1316648]
Gltscr2	-0.250215	2.88379e-36	0.461	0.469	5.45122e-32	0.461065	0.614778	NA
Ldlr	-0.251165	4.97867e-48	0.147	0.225	9.41118e-44	0.130898	0.273861	low density lipoprotein receptor [Source:MGI Symbol;Acc:MGI:96765]
Gadd45b	-0.251176	2.50282e-26	0.195	0.246	4.73109e-22	0.18393	0.316286	growth arrest and DNA-damage-inducible 45 beta [Source:MGI Symbol;Acc:MGI:107776]
Sdc1	-0.252632	5.55e-55	0.648	0.634	1.04912e-50	0.739846	0.907827	syndecan 1 [Source:MGI Symbol;Acc:MGI:1349162]
Rps29	-0.253006	0	1	1	0	3.39372	3.63473	ribosomal protein S29 [Source:MGI Symbol;Acc:MGI:107681]
Rap1gap	-0.253826	1.39647e-53	0.118	0.201	2.63975e-49	0.101856	0.241233	Rap1 GTPase-activating protein [Source:MGI Symbol;Acc:MGI:109338]
Scnn1a	-0.254734	3.90986e-34	0.234	0.291	7.39081e-30	0.218546	0.364432	sodium channel, nonvoltage-gated 1 alpha [Source:MGI Symbol;Acc:MGI:101782]
Ddx3x	-0.256242	2.41092e-33	0.358	0.387	4.55736e-29	0.339398	0.491004	DEAD/H (Asp-Glu-Ala-Asp/His) box polypeptide 3, X-linked [Source:MGI Symbol;Acc:MGI:103064]
Pfdn5	-0.258415	1.14282e-178	0.976	0.961	2.16028e-174	1.85973	2.08154	prefoldin 5 [Source:MGI Symbol;Acc:MGI:1928753]
Sord	-0.258975	4.19218e-79	0.091	0.193	7.92448e-75	0.0761107	0.226386	sorbitol dehydrogenase [Source:MGI Symbol;Acc:MGI:98266]
Elovl1	-0.263105	1.25197e-63	0.887	0.853	2.36659e-59	1.56582	1.76937	elongation of very long chain fatty acids (FEN1/Elo2, SUR4/Elo3, yeast)-like 1 [Source:MGI Symbol;Acc:MGI:1858959]
Atp1a1	-0.263202	9.25554e-45	0.542	0.536	1.74958e-40	0.57091	0.735872	ATPase, Na+/K+ transporting, alpha 1 polypeptide [Source:MGI Symbol;Acc:MGI:88105]
Rpl10	-0.263353	0	1	0.999	0	3.43435	3.68192	ribosomal protein L10 [Source:MGI Symbol;Acc:MGI:105943]
mt-Atp8	-0.265617	2.5766e-45	0.338	0.39	4.87054e-41	0.319171	0.487251	mitochondrially encoded ATP synthase 8 [Source:MGI Symbol;Acc:MGI:99926]
Mecom	-0.265924	8.05503e-38	0.348	0.385	1.52264e-33	0.331178	0.491115	MDS1 and EVI1 complex locus [Source:MGI Symbol;Acc:MGI:95457]
Spry2	-0.267827	6.69921e-33	0.186	0.248	1.26635e-28	0.178292	0.320451	sprouty RTK signaling antagonist 2 [Source:MGI Symbol;Acc:MGI:1345138]
Prps2	-0.268501	1.98355e-38	0.28	0.333	3.7495e-34	0.257214	0.414642	phosphoribosyl pyrophosphate synthetase 2 [Source:MGI Symbol;Acc:MGI:97776]
Lmo7	-0.272606	3.59322e-36	0.323	0.368	6.79227e-32	0.317793	0.481511	LIM domain only 7 [Source:MGI Symbol;Acc:MGI:1353586]
D230025D16Rik	-0.272761	5.48257e-48	0.218	0.29	1.03637e-43	0.193198	0.353737	RIKEN cDNA D230025D16 gene [Source:MGI Symbol;Acc:MGI:2443049]
Rpl34	-0.276299	0	0.996	0.993	0	2.67426	2.93303	ribosomal protein L34 [Source:MGI Symbol;Acc:MGI:1915686]
Plekhb1	-0.276488	1.48239e-50	0.227	0.3	2.80216e-46	0.200149	0.365016	pleckstrin homology domain containing, family B (evectins) member 1 [Source:MGI Symbol;Acc:MGI:1351469]
Tpt1	-0.279585	0	0.998	0.994	0	2.7129	2.96681	tumor protein, translationally-controlled 1 [Source:MGI Symbol;Acc:MGI:104890]
Scgb3a2	-0.27968	2.48449e-09	0.141	0.166	4.69643e-05	0.153449	0.229571	secretoglobin, family 3A, member 2 [Source:MGI Symbol;Acc:MGI:2153470]
Fasn	-0.280514	6.83126e-54	0.762	0.709	1.29131e-49	0.987741	1.15928	fatty acid synthase [Source:MGI Symbol;Acc:MGI:95485]
Zfp36l1	-0.280832	3.23979e-57	0.585	0.595	6.12417e-53	0.670252	0.866613	zinc finger protein 36, C3H type-like 1 [Source:MGI Symbol;Acc:MGI:107946]
Aplp2	-0.281714	1.12577e-66	0.653	0.638	2.12804e-62	0.735022	0.921511	amyloid beta (A4) precursor-like protein 2 [Source:MGI Symbol;Acc:MGI:88047]
Tmem159	-0.283486	2.38257e-52	0.264	0.335	4.50377e-48	0.237501	0.410832	transmembrane protein 159 [Source:MGI Symbol;Acc:MGI:1925752]
Dhrs3	-0.284355	3.37073e-50	0.441	0.466	6.3717e-46	0.426967	0.606381	dehydrogenase/reductase (SDR family) member 3 [Source:MGI Symbol;Acc:MGI:1315215]
Slc34a2	-0.284448	6.3257e-190	0.975	0.945	1.19575e-185	2.7021	2.91992	solute carrier family 34 (sodium phosphate), member 2 [Source:MGI Symbol;Acc:MGI:1342284]
Myh14	-0.285887	1.84337e-50	0.291	0.358	3.48453e-46	0.274158	0.451495	myosin, heavy polypeptide 14 [Source:MGI Symbol;Acc:MGI:1919210]
Rpl5	-0.286381	1.19227e-149	0.909	0.89	2.25375e-145	1.44501	1.68102	ribosomal protein L5 [Source:MGI Symbol;Acc:MGI:102854]
Slc31a1	-0.288353	7.28053e-45	0.376	0.411	1.37624e-40	0.353393	0.527317	solute carrier family 31, member 1 [Source:MGI Symbol;Acc:MGI:1333843]
Ier3	-0.289772	1.30419e-30	0.199	0.257	2.46531e-26	0.195595	0.34225	immediate early response 3 [Source:MGI Symbol;Acc:MGI:104814]
Rps28	-0.290132	0	0.997	0.986	0	2.73514	2.97916	ribosomal protein S28 [Source:MGI Symbol;Acc:MGI:1859516]
Fgfbp1	-0.294221	3.71437e-120	0.053	0.174	7.02127e-116	0.0447401	0.209585	fibroblast growth factor binding protein 1 [Source:MGI Symbol;Acc:MGI:1096350]
Gstp1	-0.295884	5.62652e-24	0.55	0.513	1.06358e-19	0.573936	0.709581	glutathione S-transferase, pi 1 [Source:MGI Symbol;Acc:MGI:95865]
Ccnd2	-0.300464	2.5865e-86	0.058	0.16	4.88927e-82	0.0586876	0.208679	cyclin D2 [Source:MGI Symbol;Acc:MGI:88314]
Arhgef38	-0.301005	2.21455e-90	0.13	0.248	4.18617e-86	0.113871	0.295269	Rho guanine nucleotide exchange factor (GEF) 38 [Source:MGI Symbol;Acc:MGI:1924919]
Tinagl1	-0.302788	2.41533e-71	0.181	0.282	4.5657e-67	0.160213	0.342901	tubulointerstitial nephritis antigen-like 1 [Source:MGI Symbol;Acc:MGI:2137617]
Gm42418	-0.314314	5.85737e-80	0.66	0.666	1.10722e-75	0.818598	1.0546	predicted gene, 42418 [Source:MGI Symbol;Acc:MGI:5649005]
Pnrc1	-0.320181	1.66804e-51	0.374	0.421	3.15309e-47	0.362099	0.556618	proline-rich nuclear receptor coactivator 1 [Source:MGI Symbol;Acc:MGI:1917838]
Npc1	-0.320393	4.67785e-71	0.246	0.339	8.84254e-67	0.226857	0.426697	NPC intracellular cholesterol transporter 1 [Source:MGI Symbol;Acc:MGI:1097712]
Nr1d1	-0.323546	1.79777e-77	0.148	0.254	3.39832e-73	0.128945	0.315895	nuclear receptor subfamily 1, group D, member 1 [Source:MGI Symbol;Acc:MGI:2444210]
Atp7b	-0.326134	4.2456e-130	0.082	0.222	8.02546e-126	0.0720876	0.265667	ATPase, Cu++ transporting, beta polypeptide [Source:MGI Symbol;Acc:MGI:103297]
Anpep	-0.327799	9.49968e-87	0.183	0.299	1.79572e-82	0.164642	0.366293	alanyl (membrane) aminopeptidase [Source:MGI Symbol;Acc:MGI:5000466]
Degs1	-0.328197	3.19757e-74	0.383	0.449	6.04436e-70	0.366666	0.583212	delta(4)-desaturase, sphingolipid 1 [Source:MGI Symbol;Acc:MGI:1097711]
Spry1	-0.330402	1.66389e-68	0.216	0.309	3.14525e-64	0.193875	0.391251	sprouty RTK signaling antagonist 1 [Source:MGI Symbol;Acc:MGI:1345139]
Swt1	-0.33458	2.74718e-73	0.447	0.5	5.193e-69	0.450809	0.6748	SWT1 RNA endoribonuclease homolog (S. cerevisiae) [Source:MGI Symbol;Acc:MGI:1914125]
C2cd4b	-0.335855	2.06978e-29	0.216	0.269	3.91251e-25	0.215008	0.378605	C2 calcium-dependent domain containing 4B [Source:MGI Symbol;Acc:MGI:1922947]
Ypel3	-0.336845	1.62255e-80	0.344	0.43	3.06711e-76	0.329248	0.554121	yippee like 3 [Source:MGI Symbol;Acc:MGI:1913340]
Epas1	-0.338859	5.738e-80	0.318	0.41	1.08465e-75	0.304367	0.527825	endothelial PAS domain protein 1 [Source:MGI Symbol;Acc:MGI:109169]
Tob1	-0.344629	5.7944e-79	0.178	0.284	1.09531e-74	0.156975	0.35862	transducer of ErbB-2.1 [Source:MGI Symbol;Acc:MGI:1349721]
Bex4	-0.344977	2.89064e-122	0.834	0.818	5.46417e-118	1.28892	1.56102	brain expressed X-linked 4 [Source:MGI Symbol;Acc:MGI:3606746]
Rps21	-0.345243	0	0.989	0.984	0	2.2573	2.58269	ribosomal protein S21 [Source:MGI Symbol;Acc:MGI:1913731]
Gem	-0.346284	1.42423e-79	0.114	0.22	2.69223e-75	0.0989969	0.282327	GTP binding protein (gene overexpressed in skeletal muscle) [Source:MGI Symbol;Acc:MGI:99844]
Lpin2	-0.34918	2.13273e-92	0.22	0.336	4.0315e-88	0.200369	0.421443	lipin 2 [Source:MGI Symbol;Acc:MGI:1891341]
Ftl1	-0.351696	4.72542e-264	1	1	8.93246e-260	3.15519	3.45351	ferritin light polypeptide 1 [Source:MGI Symbol;Acc:MGI:95589]
Klf9	-0.353105	1.00642e-74	0.312	0.396	1.90244e-70	0.293797	0.51598	Kruppel-like factor 9 [Source:MGI Symbol;Acc:MGI:1333856]
Pla2g1b	-0.353976	2.75145e-151	0.861	0.861	5.20106e-147	1.42761	1.73286	phospholipase A2, group IB, pancreas [Source:MGI Symbol;Acc:MGI:101842]
Cd36	-0.355014	3.13975e-183	0.903	0.882	5.93507e-179	1.51078	1.79806	CD36 molecule [Source:MGI Symbol;Acc:MGI:107899]
Etv5	-0.355973	2.2015e-90	0.594	0.612	4.16149e-86	0.654153	0.898483	ets variant 5 [Source:MGI Symbol;Acc:MGI:1096867]
Eef2	-0.357757	1.32212e-179	0.863	0.861	2.49921e-175	1.25022	1.54886	eukaryotic translation elongation factor 2 [Source:MGI Symbol;Acc:MGI:95288]
Rabac1	-0.357982	7.58575e-223	0.884	0.877	1.43393e-218	1.27843	1.58523	Rab acceptor 1 (prenylated) [Source:MGI Symbol;Acc:MGI:1201692]
Acly	-0.359636	1.66064e-77	0.477	0.521	3.1391e-73	0.487889	0.725016	ATP citrate lyase [Source:MGI Symbol;Acc:MGI:103251]
Rhob	-0.363362	5.18153e-98	0.139	0.264	9.79464e-94	0.126236	0.336093	ras homolog family member B [Source:MGI Symbol;Acc:MGI:107949]
Atp8a1	-0.364229	3.54287e-115	0.673	0.688	6.69708e-111	0.790712	1.05914	ATPase, aminophospholipid transporter (APLT), class I, type 8A, member 1 [Source:MGI Symbol;Acc:MGI:1330848]
Aldh1a1	-0.365718	1.03998e-32	0.049	0.101	1.96588e-28	0.0628948	0.1843	aldehyde dehydrogenase family 1, subfamily A1 [Source:MGI Symbol;Acc:MGI:1353450]
Atp6v1c2	-0.37245	1.53707e-107	0.285	0.404	2.90552e-103	0.263765	0.512213	ATPase, H+ transporting, lysosomal V1 subunit C2 [Source:MGI Symbol;Acc:MGI:1916025]
Timp3	-0.374901	1.64873e-42	0.213	0.286	3.11659e-38	0.215511	0.398009	tissue inhibitor of metalloproteinase 3 [Source:MGI Symbol;Acc:MGI:98754]
Insig1	-0.376731	3.30073e-69	0.235	0.333	6.23936e-65	0.232289	0.450003	insulin induced gene 1 [Source:MGI Symbol;Acc:MGI:1916289]
Ank3	-0.379502	9.46322e-106	0.426	0.508	1.78883e-101	0.421993	0.686389	ankyrin 3, epithelial [Source:MGI Symbol;Acc:MGI:88026]
Chka	-0.386073	2.10313e-78	0.423	0.486	3.97555e-74	0.434334	0.683253	choline kinase alpha [Source:MGI Symbol;Acc:MGI:107760]
Eef1a1	-0.393697	0	0.995	0.993	0	2.60708	2.99561	eukaryotic translation elongation factor 1 alpha 1 [Source:MGI Symbol;Acc:MGI:1096881]
Foxp1	-0.397104	2.29379e-108	0.438	0.512	4.33596e-104	0.431207	0.702553	forkhead box P1 [Source:MGI Symbol;Acc:MGI:1914004]
Srsf5	-0.397119	2.23382e-153	0.566	0.637	4.22258e-149	0.600506	0.905466	serine/arginine-rich splicing factor 5 [Source:MGI Symbol;Acc:MGI:98287]
Cirbp	-0.405049	1.05706e-104	0.286	0.397	1.99815e-100	0.2585	0.512898	cold inducible RNA binding protein [Source:MGI Symbol;Acc:MGI:893588]
Hspb1	-0.409095	3.89944e-112	0.376	0.498	7.37111e-108	0.427983	0.731979	heat shock protein 1 [Source:MGI Symbol;Acc:MGI:96240]
Use1	-0.409812	1.36217e-166	0.624	0.675	2.5749e-162	0.687169	1.00384	unconventional SNARE in the ER 1 homolog (S. cerevisiae) [Source:MGI Symbol;Acc:MGI:1914273]
Pim3	-0.410373	1.6248e-119	0.198	0.337	3.07135e-115	0.17783	0.432139	proviral integration site 3 [Source:MGI Symbol;Acc:MGI:1355297]
Rps27	-0.413526	0	0.999	0.999	0	3.25516	3.65738	ribosomal protein S27 [Source:MGI Symbol;Acc:MGI:1888676]
Acoxl	-0.415745	1.88035e-144	0.191	0.354	3.55443e-140	0.182641	0.453828	acyl-Coenzyme A oxidase-like [Source:MGI Symbol;Acc:MGI:1921371]
Aqp5	-0.418276	9.6436e-156	0.672	0.731	1.82293e-151	0.874374	1.22647	aquaporin 5 [Source:MGI Symbol;Acc:MGI:106215]
Lpcat1	-0.42047	5.14318e-199	0.838	0.837	9.72215e-195	1.22668	1.57349	lysophosphatidylcholine acyltransferase 1 [Source:MGI Symbol;Acc:MGI:2384812]
Hk2	-0.428851	7.01981e-124	0.212	0.355	1.32695e-119	0.19894	0.467166	hexokinase 2 [Source:MGI Symbol;Acc:MGI:1315197]
Ddx5	-0.429373	1.32554e-244	0.81	0.835	2.50567e-240	1.06509	1.42872	DEAD (Asp-Glu-Ala-Asp) box polypeptide 5 [Source:MGI Symbol;Acc:MGI:105037]
Abhd2	-0.433027	4.7388e-93	0.376	0.471	8.95775e-89	0.395676	0.675315	abhydrolase domain containing 2 [Source:MGI Symbol;Acc:MGI:1914344]
Abca3	-0.440685	1.04154e-186	0.687	0.736	1.96882e-182	0.833548	1.19004	ATP-binding cassette, sub-family A (ABC1), member 3 [Source:MGI Symbol;Acc:MGI:1351617]
Mettl7a1	-0.441214	1.42631e-164	0.546	0.636	2.69616e-160	0.601991	0.944704	methyltransferase like 7A1 [Source:MGI Symbol;Acc:MGI:1916523]
Cfap126	-0.442401	1.17652e-44	0.045	0.106	2.22398e-40	0.0505462	0.190008	cilia and flagella associated protein 126 [Source:MGI Symbol;Acc:MGI:1922722]
Rpl10-ps3	-0.451442	0	0.897	0.909	0	1.38896	1.80554	ribosomal protein L10, pseudogene 3 [Source:MGI Symbol;Acc:MGI:3704336]
Cox6a2	-0.456717	3.66822e-132	0.488	0.602	6.93403e-128	0.613838	0.980983	cytochrome c oxidase subunit 6A2 [Source:MGI Symbol;Acc:MGI:104649]
Camk2n1	-0.457105	1.51626e-152	0.286	0.437	2.86619e-148	0.26721	0.573855	calcium/calmodulin-dependent protein kinase II inhibitor 1 [Source:MGI Symbol;Acc:MGI:1913509]
S100a6	-0.459928	1.46375e-13	0.312	0.33	2.76692e-09	0.422103	0.622386	S100 calcium binding protein A6 (calcyclin) [Source:MGI Symbol;Acc:MGI:1339467]
mt-Nd1	-0.461696	0	0.999	1	0	3.02859	3.51119	mitochondrially encoded NADH dehydrogenase 1 [Source:MGI Symbol;Acc:MGI:101787]
Lgi3	-0.465123	8.7532e-197	0.598	0.678	1.65462e-192	0.666951	1.03375	leucine-rich repeat LGI family, member 3 [Source:MGI Symbol;Acc:MGI:2182619]
Zfos1	-0.466053	4.42581e-187	0.525	0.632	8.36611e-183	0.576106	0.950168	NA
Scgb1c1	-0.473454	3.81908e-146	0.33	0.469	7.21921e-142	0.328841	0.654631	secretoglobin, family 1C, member 1 [Source:MGI Symbol;Acc:MGI:2655401]
Aldh2	-0.474416	1.57433e-235	0.61	0.699	2.97595e-231	0.666352	1.05092	aldehyde dehydrogenase 2, mitochondrial [Source:MGI Symbol;Acc:MGI:99600]
Acot1	-0.476039	1.01163e-171	0.237	0.409	1.91228e-167	0.217163	0.532871	acyl-CoA thioesterase 1 [Source:MGI Symbol;Acc:MGI:1349396]
Socs3	-0.476635	1.24344e-85	0.153	0.267	2.35048e-81	0.139627	0.368265	suppressor of cytokine signaling 3 [Source:MGI Symbol;Acc:MGI:1201791]
Scd1	-0.476742	1.73204e-118	0.985	0.961	3.27408e-114	2.66521	2.98037	stearoyl-Coenzyme A desaturase 1 [Source:MGI Symbol;Acc:MGI:98239]
mt-Atp6	-0.477314	0	1	1	0	3.86414	4.35872	mitochondrially encoded ATP synthase 6 [Source:MGI Symbol;Acc:MGI:99927]
mt-Co2	-0.481349	0	0.999	0.999	0	2.79702	3.29497	mitochondrially encoded cytochrome c oxidase II [Source:MGI Symbol;Acc:MGI:102503]
Rps27rt	-0.48815	8.44042e-282	0.686	0.763	1.59549e-277	0.796463	1.21293	ribosomal protein S27, retrogene [Source:MGI Symbol;Acc:MGI:3704345]
Cebpa	-0.488224	4.79344e-190	0.443	0.573	9.06104e-186	0.450021	0.81511	CCAAT/enhancer binding protein (C/EBP), alpha [Source:MGI Symbol;Acc:MGI:99480]
Glul	-0.491036	2.19109e-165	0.32	0.469	4.14182e-161	0.302843	0.639101	glutamate-ammonia ligase (glutamine synthetase) [Source:MGI Symbol;Acc:MGI:95739]
Herpud1	-0.492701	6.15345e-210	0.469	0.61	1.16319e-205	0.496491	0.886072	homocysteine-inducible, endoplasmic reticulum stress-inducible, ubiquitin-like domain member 1 [Source:MGI Symbol;Acc:MGI:1927406]
Ubc	-0.492706	1.44537e-211	0.758	0.802	2.73218e-207	1.00618	1.39846	ubiquitin C [Source:MGI Symbol;Acc:MGI:98889]
Scd2	-0.494604	8.39505e-177	0.621	0.687	1.58692e-172	0.72838	1.10695	stearoyl-Coenzyme A desaturase 2 [Source:MGI Symbol;Acc:MGI:98240]
mt-Nd4l	-0.496294	1.9676e-209	0.393	0.552	3.71935e-205	0.386237	0.759778	mitochondrially encoded NADH dehydrogenase 4L [Source:MGI Symbol;Acc:MGI:102497]
Sec14l3	-0.498202	3.15234e-83	0.078	0.183	5.95888e-79	0.0809894	0.281339	SEC14-like lipid binding 3 [Source:MGI Symbol;Acc:MGI:3617848]
Hes1	-0.500901	9.5162e-36	0.313	0.359	1.79885e-31	0.32176	0.537385	hes family bHLH transcription factor 1 [Source:MGI Symbol;Acc:MGI:104853]
Igfbp6	-0.507181	8.48544e-244	0.109	0.325	1.604e-239	0.100023	0.421258	insulin-like growth factor binding protein 6 [Source:MGI Symbol;Acc:MGI:96441]
Sftpb	-0.515859	0	0.999	0.996	0	4.07325	4.55294	surfactant associated protein B [Source:MGI Symbol;Acc:MGI:109516]
Tsc22d1	-0.51703	7.62467e-165	0.525	0.622	1.44129e-160	0.573399	0.936272	TSC22 domain family, member 1 [Source:MGI Symbol;Acc:MGI:109127]
Fosb	-0.517795	4.04638e-242	0.045	0.238	7.64887e-238	0.0422277	0.323056	FBJ osteosarcoma oncogene B [Source:MGI Symbol;Acc:MGI:95575]
AY036118	-0.519209	6.97988e-253	0.332	0.524	1.31941e-248	0.303006	0.691142	cDNA sequence AY036118 [Source:MGI Symbol;Acc:MGI:2158419]
Vpreb3	-0.519264	9.4325e-119	0.093	0.228	1.78303e-114	0.0896837	0.328915	pre-B lymphocyte gene 3 [Source:MGI Symbol;Acc:MGI:98938]
Bambi	-0.522005	2.91209e-235	0.139	0.352	5.50471e-231	0.121969	0.455566	BMP and activin membrane-bound inhibitor [Source:MGI Symbol;Acc:MGI:1915260]
Gas6	-0.523974	8.41688e-238	0.322	0.522	1.59104e-233	0.318376	0.714768	growth arrest specific 6 [Source:MGI Symbol;Acc:MGI:95660]
Nr4a1	-0.538344	1.11708e-243	0.049	0.244	2.11161e-239	0.0440112	0.334381	nuclear receptor subfamily 4, group A, member 1 [Source:MGI Symbol;Acc:MGI:1352454]
Zdhhc3	-0.539554	1.20571e-143	0.564	0.631	2.27916e-139	0.644476	1.00945	zinc finger, DHHC domain containing 3 [Source:MGI Symbol;Acc:MGI:1926134]
Cyp2b10	-0.544464	1.10981e-213	0.118	0.321	2.09787e-209	0.114821	0.442683	cytochrome P450, family 2, subfamily b, polypeptide 10 [Source:MGI Symbol;Acc:MGI:88598]
mt-Co1	-0.547296	0	1	1	0	3.88109	4.45039	mitochondrially encoded cytochrome c oxidase I [Source:MGI Symbol;Acc:MGI:102504]
Pon1	-0.549192	0	0.023	0.258	0	0.0195631	0.339074	paraoxonase 1 [Source:MGI Symbol;Acc:MGI:103295]
Neat1	-0.550975	0	0.648	0.778	0	0.801191	1.30201	nuclear paraspeckle assembly transcript 1 (non-protein coding) [Source:MGI Symbol;Acc:MGI:1914211]
Cyp2f2	-0.551447	1.377e-89	0.119	0.238	2.60294e-85	0.129828	0.372397	cytochrome P450, family 2, subfamily f, polypeptide 2 [Source:MGI Symbol;Acc:MGI:88608]
Npw	-0.552122	1.85682e-304	0.587	0.719	3.50995e-300	0.653793	1.12227	neuropeptide W [Source:MGI Symbol;Acc:MGI:2685781]
Sepp1	-0.562753	0	0.778	0.857	0	1.06902	1.60069	NA
mt-Cytb	-0.56441	0	1	1	0	3.31905	3.90806	mitochondrially encoded cytochrome b [Source:MGI Symbol;Acc:MGI:102501]
Tuba1a	-0.565546	1.19365e-51	0.06	0.133	2.25636e-47	0.0728238	0.24832	tubulin, alpha 1A [Source:MGI Symbol;Acc:MGI:98869]
mt-Co3	-0.572344	0	1	1	0	3.77137	4.37034	mitochondrially encoded cytochrome c oxidase III [Source:MGI Symbol;Acc:MGI:102502]
Jund	-0.578982	0	0.843	0.894	0	1.20739	1.74213	jun D proto-oncogene [Source:MGI Symbol;Acc:MGI:96648]
Ramp1	-0.583004	0	0.492	0.677	0	0.525933	1.02054	receptor (calcitonin) activity modifying protein 1 [Source:MGI Symbol;Acc:MGI:1858418]
Nupr1	-0.591027	0	0.833	0.898	0	1.31891	1.93449	nuclear protein transcription regulator 1 [Source:MGI Symbol;Acc:MGI:1891834]
Selenbp1	-0.598326	0	0.692	0.795	0	0.871615	1.39707	selenium binding protein 1 [Source:MGI Symbol;Acc:MGI:96825]
Sftpc	-0.606003	0	1	1	0	6.82376	7.46297	surfactant associated protein C [Source:MGI Symbol;Acc:MGI:109517]
Dynlrb2	-0.611791	1.10203e-36	0.211	0.272	2.08316e-32	0.2123	0.436566	dynein light chain roadblock-type 2 [Source:MGI Symbol;Acc:MGI:1922715]
Prdx6	-0.619106	0	0.859	0.904	0	1.26869	1.81639	peroxiredoxin 6 [Source:MGI Symbol;Acc:MGI:894320]
Junb	-0.631797	2.65597e-147	0.471	0.583	5.02058e-143	0.54393	0.946521	jun B proto-oncogene [Source:MGI Symbol;Acc:MGI:96647]
mt-Nd3	-0.634403	0	0.344	0.589	0	0.334146	0.831598	mitochondrially encoded NADH dehydrogenase 3 [Source:MGI Symbol;Acc:MGI:102499]
mt-Nd5	-0.647052	0	0.673	0.813	0	0.780974	1.36343	mitochondrially encoded NADH dehydrogenase 5 [Source:MGI Symbol;Acc:MGI:102496]
Klf6	-0.650332	3.00715e-145	0.272	0.423	5.68442e-141	0.272936	0.634275	Kruppel-like factor 6 [Source:MGI Symbol;Acc:MGI:1346318]
Cpm	-0.653637	0	0.334	0.577	0	0.331118	0.834324	carboxypeptidase M [Source:MGI Symbol;Acc:MGI:1917824]
mt-Nd4	-0.675048	0	0.998	0.999	0	2.61724	3.32441	mitochondrially encoded NADH dehydrogenase 4 [Source:MGI Symbol;Acc:MGI:102498]
Zfp36	-0.679374	7.18423e-293	0.374	0.578	1.35804e-288	0.371016	0.856463	zinc finger protein 36 [Source:MGI Symbol;Acc:MGI:99180]
Ang	-0.688412	0	0.408	0.639	0	0.41074	0.959674	angiogenin, ribonuclease, RNase A family, 5 [Source:MGI Symbol;Acc:MGI:88022]
1110017D15Rik	-0.688508	5.6997e-79	0.03	0.111	1.07741e-74	0.0428487	0.232013	RIKEN cDNA 1110017D15 gene [Source:MGI Symbol;Acc:MGI:1920971]
Ier2	-0.709741	1.19897e-205	0.406	0.556	2.26641e-201	0.418616	0.866205	immediate early response 2 [Source:MGI Symbol;Acc:MGI:104815]
Cst8	-0.715708	0	0.114	0.404	0	0.107416	0.573614	cystatin 8 (cystatin-related epididymal spermatogenic) [Source:MGI Symbol;Acc:MGI:107161]
Atf3	-0.717778	5.43277e-178	0.149	0.329	1.02696e-173	0.141406	0.496416	activating transcription factor 3 [Source:MGI Symbol;Acc:MGI:109384]
Btg2	-0.735819	8.86701e-308	0.344	0.56	1.67613e-303	0.336948	0.852813	B cell translocation gene 2, anti-proliferative [Source:MGI Symbol;Acc:MGI:108384]
Cat	-0.750583	0	0.419	0.677	0	0.414798	1.03138	catalase [Source:MGI Symbol;Acc:MGI:88271]
Dusp1	-0.764174	0	0.329	0.596	0	0.350113	0.93441	dual specificity phosphatase 1 [Source:MGI Symbol;Acc:MGI:105120]
Rnase4	-0.772044	0	0.816	0.921	0	1.29497	2.09885	ribonuclease, RNase A family 4 [Source:MGI Symbol;Acc:MGI:1926217]
Ces1d	-0.780687	0	0.463	0.718	0	0.482073	1.14223	carboxylesterase 1D [Source:MGI Symbol;Acc:MGI:2148202]
Lyz2	-0.81097	0	1	1	0	4.83367	5.72922	lysozyme 2 [Source:MGI Symbol;Acc:MGI:96897]
Egr1	-0.82766	1.80191e-291	0.096	0.34	3.40616e-287	0.0998237	0.529284	early growth response 1 [Source:MGI Symbol;Acc:MGI:95295]
mt-Nd2	-0.855422	0	0.976	0.993	0	1.9613	2.84665	mitochondrially encoded NADH dehydrogenase 2 [Source:MGI Symbol;Acc:MGI:102500]
Malat1	-0.855566	0	1	1	0	4.81332	5.71134	metastasis associated lung adenocarcinoma transcript 1 (non-coding RNA) [Source:MGI Symbol;Acc:MGI:1919539]
Tppp3	-0.871893	1.06522e-13	0.418	0.409	2.01359e-09	0.460071	0.681199	tubulin polymerization-promoting protein family member 3 [Source:MGI Symbol;Acc:MGI:1915221]
Rgcc	-1.04518	0	0.59	0.815	0	0.798671	1.72439	regulator of cell cycle [Source:MGI Symbol;Acc:MGI:1913464]
Jun	-1.0535	0	0.448	0.75	0	0.478108	1.3218	jun proto-oncogene [Source:MGI Symbol;Acc:MGI:96646]
Apoe	-1.05543	0	0.548	0.761	0	0.676793	1.53059	apolipoprotein E [Source:MGI Symbol;Acc:MGI:88057]
Fos	-1.06692	0	0.364	0.642	0	0.420663	1.16379	FBJ osteosarcoma oncogene [Source:MGI Symbol;Acc:MGI:95574]
Errfi1	-1.07865	0	0.624	0.873	0	0.758335	1.7821	ERBB receptor feedback inhibitor 1 [Source:MGI Symbol;Acc:MGI:1921405]
Gstm1	-1.09879	0	0.17	0.501	0	0.159794	0.787029	glutathione S-transferase, mu 1 [Source:MGI Symbol;Acc:MGI:95860]
Bex2	-1.42932	0	0.173	0.692	0	0.189563	1.31689	brain expressed X-linked 2 [Source:MGI Symbol;Acc:MGI:1338017]
Lyz1	-1.56684	0	0.611	0.903	0	0.943219	2.2398	lysozyme 1 [Source:MGI Symbol;Acc:MGI:96902]
Cbr2	-1.60442	0	0.813	0.991	0	1.47004	3.4307	carbonyl reductase 2 [Source:MGI Symbol;Acc:MGI:107200]

## Sheet: KO Saline vs WT Saline updated
Gene	avg_logFC	p_val	pct.1	pct.2	p_val_adj	mean.KO.Saline	mean.WT.Saline	Gene.description
Xist	2.45016	0	0.911	0.003	0	2.15482	0.00314786	inactive X specific transcripts [Source:MGI Symbol;Acc:MGI:98974]
Mgp	1.06871	2.01695e-162	0.37	0.173	3.81265e-158	0.760108	0.264655	matrix Gla protein [Source:MGI Symbol;Acc:MGI:96976]
Scgb3a1	0.97155	3.55929e-97	0.21	0.082	6.72813e-93	0.302526	0.0969692	secretoglobin, family 3A, member 1 [Source:MGI Symbol;Acc:MGI:1915912]
Inmt	0.873016	5.29323e-61	0.13	0.047	1.00058e-56	0.322789	0.0922824	indolethylamine N-methyltransferase [Source:MGI Symbol;Acc:MGI:102963]
Bpifa1	0.837232	4.72144e-75	0.127	0.038	8.92493e-71	0.179647	0.0447317	BPI fold containing family A, member 1 [Source:MGI Symbol;Acc:MGI:1338036]
Retnla	0.833906	4.77281e-59	0.221	0.117	9.02204e-55	0.331274	0.157113	resistin like alpha [Source:MGI Symbol;Acc:MGI:1888504]
Mfap4	0.802741	3.00752e-74	0.121	0.034	5.68511e-70	0.270014	0.0673815	microfibrillar-associated protein 4 [Source:MGI Symbol;Acc:MGI:1342276]
Gpx3	0.697563	1.59799e-47	0.124	0.051	3.02067e-43	0.289608	0.0945068	glutathione peroxidase 3 [Source:MGI Symbol;Acc:MGI:105102]
Pfn1	0.601881	1.17499e-287	0.682	0.477	2.22108e-283	1.15512	0.625256	profilin 1 [Source:MGI Symbol;Acc:MGI:97549]
Chia1	0.554583	5.62997e-138	0.653	0.501	1.06423e-133	1.30533	0.825538	chitinase, acidic 1 [Source:MGI Symbol;Acc:MGI:1932052]
Lgals1	0.529181	1.74407e-37	0.103	0.044	3.29681e-33	0.225929	0.0773027	lectin, galactose binding, soluble 1 [Source:MGI Symbol;Acc:MGI:96777]
Dmkn	0.514436	7.87834e-124	0.514	0.339	1.48924e-119	0.941215	0.525647	dermokine [Source:MGI Symbol;Acc:MGI:1920962]
Hspb1	0.507789	1.59628e-105	0.611	0.498	3.01744e-101	1.108	0.731979	heat shock protein 1 [Source:MGI Symbol;Acc:MGI:96240]
Igfbp7	0.494494	4.22507e-83	0.7	0.634	7.98665e-79	1.32734	0.98985	insulin-like growth factor binding protein 7 [Source:MGI Symbol;Acc:MGI:1352480]
Ifitm3	0.471218	1.46615e-09	0.198	0.163	2.77147e-05	0.400766	0.267077	interferon induced transmembrane protein 3 [Source:MGI Symbol;Acc:MGI:1913391]
Tmsb10	0.449338	1.16059e-11	0.658	0.676	2.19386e-07	1.32699	1.17272	thymosin, beta 10 [Source:MGI Symbol;Acc:MGI:109146]
Cebpb	0.436413	2.33744e-54	0.433	0.34	4.41847e-50	0.708986	0.455447	CCAAT/enhancer binding protein (C/EBP), beta [Source:MGI Symbol;Acc:MGI:88373]
Cst3	0.384155	4.91777e-18	0.856	0.885	9.29606e-14	1.77558	1.63955	cystatin C [Source:MGI Symbol;Acc:MGI:102519]
Rbp1	0.367409	1.77408e-46	0.114	0.045	3.35354e-42	0.205639	0.0682968	retinol binding protein 1, cellular [Source:MGI Symbol;Acc:MGI:97876]
Ifitm2	0.351386	8.24766e-17	0.515	0.51	1.55905e-12	0.864745	0.711727	interferon induced transmembrane protein 2 [Source:MGI Symbol;Acc:MGI:1933382]
Cd81	0.345447	8.68668e-45	0.649	0.624	1.64204e-40	1.12761	0.913297	CD81 antigen [Source:MGI Symbol;Acc:MGI:1096398]
Serpinh1	0.339648	1.94049e-38	0.309	0.229	3.66811e-34	0.468003	0.285361	serine (or cysteine) peptidase inhibitor, clade H, member 1 [Source:MGI Symbol;Acc:MGI:88283]
Limch1	0.337091	3.30144e-10	0.225	0.197	6.24072e-06	0.371581	0.249219	LIM and calponin homology domains 1 [Source:MGI Symbol;Acc:MGI:1924819]
Nrn1	0.332353	1.52805e-62	0.314	0.19	2.88848e-58	0.492054	0.271888	neuritin 1 [Source:MGI Symbol;Acc:MGI:1915654]
Scgb1a1	0.329445	4.92911e-47	1	1	9.31749e-43	3.85343	3.74269	secretoglobin, family 1A, member 1 (uteroglobin) [Source:MGI Symbol;Acc:MGI:98919]
Sparc	0.292798	1.13871e-22	0.477	0.443	2.15251e-18	0.797519	0.627748	secreted acidic cysteine rich glycoprotein [Source:MGI Symbol;Acc:MGI:98373]
Id3	0.283507	3.4884e-15	0.147	0.102	6.59412e-11	0.265606	0.163017	inhibitor of DNA binding 3 [Source:MGI Symbol;Acc:MGI:96398]
Macf1	0.28234	2.19925e-11	0.181	0.147	4.15724e-07	0.282042	0.17856	microtubule-actin crosslinking factor 1 [Source:MGI Symbol;Acc:MGI:108559]
Hspa8	0.276839	3.99224e-115	0.934	0.916	7.54654e-111	2.13902	1.8645	heat shock protein 8 [Source:MGI Symbol;Acc:MGI:105384]
Npnt	0.26302	6.31851e-23	0.216	0.158	1.19439e-18	0.327075	0.197661	nephronectin [Source:MGI Symbol;Acc:MGI:2148811]
Ager	0.262962	7.81502e-85	0.887	0.877	1.47727e-80	2.15085	1.87923	advanced glycosylation end product-specific receptor [Source:MGI Symbol;Acc:MGI:893592]
Rps27rt	0.260706	1.69163e-70	0.79	0.763	3.19768e-66	1.4371	1.21293	ribosomal protein S27, retrogene [Source:MGI Symbol;Acc:MGI:3704345]
Erdr1	0.260593	3.79428e-56	0.179	0.087	7.17233e-52	0.244181	0.101034	NA
Apoe	0.259014	3.27362e-32	0.802	0.761	6.18812e-28	1.76063	1.53059	apolipoprotein E [Source:MGI Symbol;Acc:MGI:88057]
Cryab	0.249358	6.6693e-19	0.296	0.25	1.2607e-14	0.448016	0.316057	crystallin, alpha B [Source:MGI Symbol;Acc:MGI:88516]
Pmvk	0.241564	1.00793e-22	0.485	0.445	1.90529e-18	0.812803	0.650455	phosphomevalonate kinase [Source:MGI Symbol;Acc:MGI:1915853]
Hmgb1	0.237528	1.93202e-61	0.82	0.795	3.65211e-57	1.55434	1.34002	high mobility group box 1 [Source:MGI Symbol;Acc:MGI:96113]
Igfbp6	0.237189	4.19087e-09	0.342	0.325	7.922e-05	0.517703	0.421258	insulin-like growth factor binding protein 6 [Source:MGI Symbol;Acc:MGI:96441]
Csrp1	0.23462	1.08893e-09	0.556	0.581	2.0584e-05	0.928145	0.832192	cysteine and glycine-rich protein 1 [Source:MGI Symbol;Acc:MGI:88549]
Hsp90ab1	0.233778	2.83666e-75	0.866	0.846	5.36214e-71	1.78525	1.54919	heat shock protein 90 alpha (cytosolic), class B member 1 [Source:MGI Symbol;Acc:MGI:96247]
Actb	0.229558	1.10296e-19	0.968	0.975	2.08493e-15	2.72733	2.58273	actin, beta [Source:MGI Symbol;Acc:MGI:87904]
Il33	0.223722	4.22267e-10	0.444	0.446	7.98211e-06	0.727115	0.620338	interleukin 33 [Source:MGI Symbol;Acc:MGI:1924375]
Cox6a2	0.218752	5.16484e-16	0.602	0.602	9.76309e-12	1.1154	0.980983	cytochrome c oxidase subunit 6A2 [Source:MGI Symbol;Acc:MGI:104649]
Dnaja1	0.216588	8.2629e-27	0.512	0.477	1.56194e-22	0.792543	0.643161	DnaJ heat shock protein family (Hsp40) member A1 [Source:MGI Symbol;Acc:MGI:1270129]
Pmp22	0.214147	2.67767e-07	0.121	0.097	0.00506161	0.198848	0.124577	peripheral myelin protein 22 [Source:MGI Symbol;Acc:MGI:97631]
Hspa5	0.213721	2.84353e-22	0.561	0.547	5.37513e-18	0.922232	0.784117	heat shock protein 5 [Source:MGI Symbol;Acc:MGI:95835]
Bloc1s1	0.21247	1.25269e-23	0.411	0.372	2.36795e-19	0.596473	0.461448	biogenesis of lysosomal organelles complex-1, subunit 1 [Source:MGI Symbol;Acc:MGI:1195276]
Gm11808	0.211032	9.97788e-36	0.663	0.649	1.88612e-31	1.09372	0.938992	predicted gene 11808 [Source:MGI Symbol;Acc:MGI:3649356]
Wdr89	0.209351	6.7937e-47	0.761	0.748	1.28421e-42	1.33351	1.16252	WD repeat domain 89 [Source:MGI Symbol;Acc:MGI:1919588]
Manf	0.209279	6.66339e-16	0.509	0.504	1.25958e-11	0.821897	0.702678	mesencephalic astrocyte-derived neurotrophic factor [Source:MGI Symbol;Acc:MGI:1922090]
Hmgb2	0.209275	2.03808e-14	0.367	0.341	3.85259e-10	0.5429	0.431711	high mobility group box 2 [Source:MGI Symbol;Acc:MGI:96157]
Ddx3x	0.209076	2.4053e-23	0.425	0.387	4.54673e-19	0.62597	0.491004	DEAD/H (Asp-Glu-Ala-Asp/His) box polypeptide 3, X-linked [Source:MGI Symbol;Acc:MGI:103064]
Gm8730	0.20875	3.55767e-33	0.613	0.594	6.72507e-29	0.981113	0.83198	predicted pseudogene 8730 [Source:MGI Symbol;Acc:MGI:3644565]
Tmem243	0.207653	1.46909e-39	0.783	0.785	2.77701e-35	1.51178	1.35225	transmembrane protein 243, mitochondrial [Source:MGI Symbol;Acc:MGI:3606159]
Malat1	0.20644	9.13823e-72	1	1	1.7274e-67	5.92812	5.71134	metastasis associated lung adenocarcinoma transcript 1 (non-coding RNA) [Source:MGI Symbol;Acc:MGI:1919539]
Hist1h2bc	0.203534	1.4748e-22	0.519	0.487	2.78782e-18	0.858089	0.710402	histone cluster 1, H2bc [Source:MGI Symbol;Acc:MGI:1915274]
Hspe1	0.201474	2.22435e-26	0.641	0.635	4.20468e-22	1.05804	0.922312	heat shock protein 1 (chaperonin 10) [Source:MGI Symbol;Acc:MGI:104680]
St13	0.196872	3.68999e-19	0.43	0.399	6.97518e-15	0.640347	0.515184	suppression of tumorigenicity 13 [Source:MGI Symbol;Acc:MGI:1917606]
1810010H24Rik	0.1876	7.64723e-18	0.192	0.143	1.44556e-13	0.26828	0.171516	RIKEN cDNA 1810010H24 gene [Source:MGI Symbol;Acc:MGI:1916316]
Kcnj15	0.182913	5.18383e-13	0.402	0.384	9.799e-09	0.598062	0.493939	potassium inwardly-rectifying channel, subfamily J, member 15 [Source:MGI Symbol;Acc:MGI:1310000]
Krt8	-0.185372	2.6976e-32	0.347	0.481	5.09927e-28	0.546839	0.72523	keratin 8 [Source:MGI Symbol;Acc:MGI:96705]
Gm26917	-0.187898	2.32354e-53	0.149	0.274	4.3922e-49	0.190718	0.332511	predicted gene, 26917 [Source:MGI Symbol;Acc:MGI:5504032]
Btg2	-0.192436	8.04804e-35	0.425	0.56	1.52132e-30	0.654931	0.852813	B cell translocation gene 2, anti-proliferative [Source:MGI Symbol;Acc:MGI:108384]
Klf6	-0.193332	6.59085e-27	0.307	0.423	1.24587e-22	0.480323	0.634275	Kruppel-like factor 6 [Source:MGI Symbol;Acc:MGI:1346318]
Cfap126	-0.197985	8.62883e-18	0.061	0.106	1.63111e-13	0.11461	0.190008	cilia and flagella associated protein 126 [Source:MGI Symbol;Acc:MGI:1922722]
Cited2	-0.198456	1.64061e-37	0.449	0.594	3.10124e-33	0.70285	0.914209	Cbp/p300-interacting transactivator, with Glu/Asp-rich carboxy-terminal domain, 2 [Source:MGI Symbol;Acc:MGI:1306784]
mt-Nd3	-0.200124	7.76235e-52	0.411	0.589	1.46732e-47	0.602757	0.831598	mitochondrially encoded NADH dehydrogenase 3 [Source:MGI Symbol;Acc:MGI:102499]
Sec14l3	-0.201275	1.15282e-14	0.128	0.183	2.17917e-10	0.197372	0.281339	SEC14-like lipid binding 3 [Source:MGI Symbol;Acc:MGI:3617848]
1110017D15Rik	-0.205768	5.25018e-18	0.064	0.111	9.92442e-14	0.146696	0.232013	RIKEN cDNA 1110017D15 gene [Source:MGI Symbol;Acc:MGI:1920971]
Dynlrb2	-0.206634	5.07222e-27	0.18	0.272	9.58802e-23	0.304412	0.436566	dynein light chain roadblock-type 2 [Source:MGI Symbol;Acc:MGI:1922715]
mt-Cytb	-0.208575	4.56509e-161	1	1	8.62938e-157	3.67928	3.90806	mitochondrially encoded cytochrome b [Source:MGI Symbol;Acc:MGI:102501]
mt-Co3	-0.212421	1.57889e-186	1	1	2.98458e-182	4.1394	4.37034	mitochondrially encoded cytochrome c oxidase III [Source:MGI Symbol;Acc:MGI:102502]
Nupr1	-0.213684	2.20841e-63	0.802	0.898	4.17456e-59	1.63626	1.93449	nuclear protein transcription regulator 1 [Source:MGI Symbol;Acc:MGI:1891834]
mt-Co2	-0.215358	4.06677e-151	0.994	0.999	7.68741e-147	3.03628	3.29497	mitochondrially encoded cytochrome c oxidase II [Source:MGI Symbol;Acc:MGI:102503]
Gpx2	-0.219062	1.71209e-25	0.076	0.137	3.23636e-21	0.109577	0.197514	glutathione peroxidase 2 [Source:MGI Symbol;Acc:MGI:106609]
Eif2s3y	-0.21928	1.43442e-139	0	0.11	2.71149e-135	0	0.124477	eukaryotic translation initiation factor 2, subunit 3, structural gene Y-linked [Source:MGI Symbol;Acc:MGI:1349430]
Calm1	-0.219567	1.37843e-40	0.773	0.868	2.60565e-36	1.49141	1.74337	calmodulin 1 [Source:MGI Symbol;Acc:MGI:88251]
C2cd4b	-0.227441	2.26827e-42	0.159	0.269	4.28772e-38	0.230778	0.378605	C2 calcium-dependent domain containing 4B [Source:MGI Symbol;Acc:MGI:1922947]
mt-Atp6	-0.234394	2.94852e-230	1	1	5.57358e-226	4.10325	4.35872	mitochondrially encoded ATP synthase 6 [Source:MGI Symbol;Acc:MGI:99927]
mt-Nd1	-0.234853	9.76187e-173	0.999	1	1.84529e-168	3.23852	3.51119	mitochondrially encoded NADH dehydrogenase 1 [Source:MGI Symbol;Acc:MGI:101787]
Lgals3	-0.240392	3.52786e-58	0.199	0.344	6.6687e-54	0.305096	0.496899	lectin, galactose binding, soluble 3 [Source:MGI Symbol;Acc:MGI:96778]
mt-Nd4	-0.241377	2.94338e-186	0.997	0.999	5.56387e-182	3.04202	3.32441	mitochondrially encoded NADH dehydrogenase 4 [Source:MGI Symbol;Acc:MGI:102498]
Mt1	-0.248071	2.96937e-69	0.69	0.849	5.613e-65	1.47003	1.8592	metallothionein 1 [Source:MGI Symbol;Acc:MGI:97171]
Areg	-0.25134	6.15611e-48	0.105	0.206	1.16369e-43	0.165968	0.310875	amphiregulin [Source:MGI Symbol;Acc:MGI:88068]
Krt18	-0.253081	2.27133e-41	0.424	0.581	4.2935e-37	0.673872	0.904341	keratin 18 [Source:MGI Symbol;Acc:MGI:96692]
Tppp3	-0.272799	5.17628e-20	0.304	0.409	9.78472e-16	0.526421	0.681199	tubulin polymerization-promoting protein family member 3 [Source:MGI Symbol;Acc:MGI:1915221]
Cst8	-0.281105	3.74609e-73	0.236	0.404	7.08124e-69	0.341869	0.573614	cystatin 8 (cystatin-related epididymal spermatogenic) [Source:MGI Symbol;Acc:MGI:107161]
Bex2	-0.286049	4.32651e-68	0.53	0.692	8.17841e-64	0.979433	1.31689	brain expressed X-linked 2 [Source:MGI Symbol;Acc:MGI:1338017]
Ddx3y	-0.291737	1.65398e-187	0	0.145	3.12651e-183	0	0.168633	DEAD (Asp-Glu-Ala-Asp) box polypeptide 3, Y-linked [Source:MGI Symbol;Acc:MGI:1349406]
Atf3	-0.293619	6.62345e-64	0.181	0.329	1.25203e-59	0.289966	0.496416	activating transcription factor 3 [Source:MGI Symbol;Acc:MGI:109384]
mt-Nd2	-0.299188	2.4843e-198	0.971	0.993	4.69607e-194	2.4934	2.84665	mitochondrially encoded NADH dehydrogenase 2 [Source:MGI Symbol;Acc:MGI:102500]
Lyz1	-0.31264	3.55526e-38	0.807	0.903	6.7205e-34	1.90929	2.2398	lysozyme 1 [Source:MGI Symbol;Acc:MGI:96902]
Gm42418	-0.317951	6.76309e-97	0.452	0.666	1.27843e-92	0.706679	1.0546	predicted gene, 42418 [Source:MGI Symbol;Acc:MGI:5649005]
Neat1	-0.32546	1.02207e-121	0.556	0.778	1.93203e-117	0.901119	1.30201	nuclear paraspeckle assembly transcript 1 (non-protein coding) [Source:MGI Symbol;Acc:MGI:1914211]
AY036118	-0.411684	1.95413e-201	0.231	0.524	3.69388e-197	0.31002	0.691142	cDNA sequence AY036118 [Source:MGI Symbol;Acc:MGI:2158419]
Lrg1	-0.416892	1.87899e-95	0.273	0.472	3.55185e-91	0.469623	0.807903	leucine-rich alpha-2-glycoprotein 1 [Source:MGI Symbol;Acc:MGI:1924155]
Nnat	-0.434307	2.53981e-138	0	0.109	4.80101e-134	0	0.155127	neuronatin [Source:MGI Symbol;Acc:MGI:104716]
Mt2	-0.480651	1.19703e-103	0.295	0.511	2.26274e-99	0.562182	0.948996	metallothionein 2 [Source:MGI Symbol;Acc:MGI:97172]

## Sheet: KO HDM vs WT Saline updated
Gene	avg_logFC	p_val	pct.1	pct.2	p_val_adj	mean.KO.HDM	mean.WT.Saline	Gene.description
Retnla	6.42018	0	1	0.117	0	6.68535	0.157113	resistin like alpha [Source:MGI Symbol;Acc:MGI:1888504]
Chia1	2.45952	0	0.992	0.501	0	3.45401	0.825538	chitinase, acidic 1 [Source:MGI Symbol;Acc:MGI:1932052]
Fxyd4	2.19299	0	0.876	0.014	0	1.79489	0.0169124	FXYD domain-containing ion transport regulator 4 [Source:MGI Symbol;Acc:MGI:1889005]
B2m	1.89246	0	0.999	0.835	0	3.79948	1.61746	beta-2 microglobulin [Source:MGI Symbol;Acc:MGI:88127]
Slc26a4	1.63598	0	0.845	0.018	0	1.40588	0.0196442	solute carrier family 26, member 4 [Source:MGI Symbol;Acc:MGI:1346029]
Ifi27l2a	1.47958	0	0.703	0.09	0	1.27407	0.140068	interferon, alpha-inducible protein 27 like 2A [Source:MGI Symbol;Acc:MGI:1924183]
Il33	1.39344	0	0.904	0.446	0	1.99793	0.620338	interleukin 33 [Source:MGI Symbol;Acc:MGI:1924375]
Pglyrp1	1.34285	0	0.61	0.043	0	0.907521	0.0489663	peptidoglycan recognition protein 1 [Source:MGI Symbol;Acc:MGI:1345092]
Tmem213	1.33594	0	0.724	0.053	0	1.13016	0.0622847	transmembrane protein 213 [Source:MGI Symbol;Acc:MGI:1924772]
H2-K1	1.24815	0	0.996	0.79	0	2.86997	1.40509	histocompatibility 2, K1, K region [Source:MGI Symbol;Acc:MGI:95904]
Lcn2	1.21971	0	0.989	0.858	0	3.30461	1.86692	lipocalin 2 [Source:MGI Symbol;Acc:MGI:96757]
H2-D1	1.21653	0	0.995	0.85	0	2.92881	1.56194	histocompatibility 2, D region locus 1 [Source:MGI Symbol;Acc:MGI:95896]
Car2	1.16804	0	0.797	0.248	0	1.32548	0.296995	carbonic anhydrase 2 [Source:MGI Symbol;Acc:MGI:88269]
H2-Q7	1.12872	0	0.728	0.085	0	1.07955	0.109846	histocompatibility 2, Q region locus 7 [Source:MGI Symbol;Acc:MGI:95936]
Prdx4	1.1157	0	0.833	0.275	0	1.38094	0.328401	peroxiredoxin 4 [Source:MGI Symbol;Acc:MGI:1859815]
Serpinb6b	1.05032	0	0.794	0.304	0	1.30341	0.372905	serine (or cysteine) peptidase inhibitor, clade B, member 6b [Source:MGI Symbol;Acc:MGI:894688]
Clu	1.00914	0	0.833	0.427	0	1.48908	0.584444	clusterin [Source:MGI Symbol;Acc:MGI:88423]
Ly6i	1.00558	0	0.595	0.096	0	0.908422	0.130314	lymphocyte antigen 6 complex, locus I [Source:MGI Symbol;Acc:MGI:1888480]
H2afz	0.980603	0	0.936	0.741	0	2.00278	1.17893	H2A histone family, member Z [Source:MGI Symbol;Acc:MGI:1888388]
Gclc	0.901893	0	0.948	0.618	0	1.99262	0.970749	glutamate-cysteine ligase, catalytic subunit [Source:MGI Symbol;Acc:MGI:104990]
Hmgb2	0.875368	0	0.705	0.341	0	1.09972	0.431711	high mobility group box 2 [Source:MGI Symbol;Acc:MGI:96157]
Slpi	0.841296	0	0.759	0.352	0	1.26325	0.484126	secretory leukocyte peptidase inhibitor [Source:MGI Symbol;Acc:MGI:109297]
Tmem176a	0.828366	0	0.925	0.579	0	1.75292	0.82801	transmembrane protein 176A [Source:MGI Symbol;Acc:MGI:1913308]
Gapdh	0.817329	0	0.963	0.733	0	2.11277	1.17945	glyceraldehyde-3-phosphate dehydrogenase [Source:MGI Symbol;Acc:MGI:95640]
Atp5f1	0.791851	0	0.934	0.653	0	1.82844	0.949298	ATP synthase, H+ transporting, mitochondrial F0 complex, subunit B1 [Source:MGI Symbol;Acc:MGI:1100495]
C3	0.771286	0	0.699	0.246	0	0.975337	0.301364	complement component 3 [Source:MGI Symbol;Acc:MGI:88227]
Bst2	0.742896	0	0.646	0.155	0	0.838707	0.188701	bone marrow stromal cell antigen 2 [Source:MGI Symbol;Acc:MGI:1916800]
Wbp5	0.733784	0	0.984	0.906	0	2.6325	1.8484	NA
Cyba	0.731773	0	0.872	0.594	0	1.54654	0.8402	cytochrome b-245, alpha polypeptide [Source:MGI Symbol;Acc:MGI:1316658]
Tnfrsf9	0.731348	0	0.457	0.009	0	0.524594	0.00915246	tumor necrosis factor receptor superfamily, member 9 [Source:MGI Symbol;Acc:MGI:1101059]
Ptgs1	0.728971	0	0.682	0.206	0	0.901317	0.243631	prostaglandin-endoperoxide synthase 1 [Source:MGI Symbol;Acc:MGI:97797]
S100a11	0.72058	0	0.997	0.956	0	3.08259	2.26082	S100 calcium binding protein A11 [Source:MGI Symbol;Acc:MGI:1338798]
Hmgn2	0.718133	0	0.599	0.226	0	0.836557	0.277802	high mobility group nucleosomal binding domain 2 [Source:MGI Symbol;Acc:MGI:96136]
Chil1	0.71019	0	0.996	0.953	0	3.59082	2.8201	chitinase-like 1 [Source:MGI Symbol;Acc:MGI:1340899]
Sftpd	0.705766	0	0.999	0.973	0	4.19469	3.39129	surfactant associated protein D [Source:MGI Symbol;Acc:MGI:109515]
2200002D01Rik	0.699369	0	0.509	0.125	0	0.652767	0.151733	RIKEN cDNA 2200002D01 gene [Source:MGI Symbol;Acc:MGI:1919525]
Mif	0.681035	0	0.889	0.586	0	1.54804	0.818745	macrophage migration inhibitory factor (glycosylation-inhibiting factor) [Source:MGI Symbol;Acc:MGI:96982]
Dynlrb1	0.6775	0	0.941	0.704	0	1.80054	1.05528	dynein light chain roadblock-type 1 [Source:MGI Symbol;Acc:MGI:1914318]
Cystm1	0.665478	0	0.957	0.745	0	1.9639	1.18857	cysteine-rich transmembrane module containing 1 [Source:MGI Symbol;Acc:MGI:1913310]
Ctsz	0.659054	0	0.842	0.505	0	1.34541	0.669102	cathepsin Z [Source:MGI Symbol;Acc:MGI:1891190]
Serpinb9	0.633944	0	0.532	0.184	0	0.687194	0.218593	serine (or cysteine) peptidase inhibitor, clade B, member 9 [Source:MGI Symbol;Acc:MGI:106603]
Ifitm3	0.630766	0	0.675	0.163	0	1.00262	0.267077	interferon induced transmembrane protein 3 [Source:MGI Symbol;Acc:MGI:1913391]
Ly6e	0.628929	0	0.99	0.895	0	2.636	1.85301	lymphocyte antigen 6 complex, locus E [Source:MGI Symbol;Acc:MGI:106651]
Dmkn	0.620724	0	0.712	0.339	0	1.17021	0.525647	dermokine [Source:MGI Symbol;Acc:MGI:1920962]
Tspan8	0.617347	0	0.648	0.242	0	0.847791	0.292971	tetraspanin 8 [Source:MGI Symbol;Acc:MGI:2384918]
Psmb8	0.612809	0	0.653	0.23	0	0.839521	0.277451	proteasome (prosome, macropain) subunit, beta type 8 (large multifunctional peptidase 7) [Source:MGI Symbol;Acc:MGI:1346527]
Myl6	0.611417	0	0.996	0.958	0	2.82367	2.13408	myosin, light polypeptide 6, alkali, smooth muscle and non-muscle [Source:MGI Symbol;Acc:MGI:109318]
Bcap29	0.608406	0	0.526	0.095	0	0.592377	0.105081	B cell receptor associated protein 29 [Source:MGI Symbol;Acc:MGI:101917]
Tma7	0.603035	0	0.929	0.677	0	1.69457	1.0011	translational machinery associated 7 [Source:MGI Symbol;Acc:MGI:1913417]
Cox5a	0.600981	0	0.928	0.678	0	1.69693	0.998995	cytochrome c oxidase subunit 5A [Source:MGI Symbol;Acc:MGI:88474]
Cox7a2	0.593519	0	0.986	0.917	0	2.43816	1.77412	cytochrome c oxidase subunit 7A2 [Source:MGI Symbol;Acc:MGI:1316715]
Mt1	0.587204	0	0.969	0.849	0	2.72999	1.8592	metallothionein 1 [Source:MGI Symbol;Acc:MGI:97171]
Npc2	0.586441	0	1	0.994	0	4.33085	3.69972	NPC intracellular cholesterol transporter 2 [Source:MGI Symbol;Acc:MGI:1915213]
Ly6a	0.586266	0	0.41	0.097	0	0.525175	0.123217	lymphocyte antigen 6 complex, locus A [Source:MGI Symbol;Acc:MGI:107527]
Cox5b	0.576083	0	0.96	0.778	0	1.93086	1.24851	cytochrome c oxidase subunit 5B [Source:MGI Symbol;Acc:MGI:88475]
Taf10	0.571242	0	0.694	0.299	0	0.901788	0.356789	TATA-box binding protein associated factor 10 [Source:MGI Symbol;Acc:MGI:1346320]
Rnaset2a	0.570561	0	0.848	0.527	0	1.32261	0.700117	ribonuclease T2A [Source:MGI Symbol;Acc:MGI:1915445]
Ifi27	0.56553	0	0.809	0.468	0	1.2588	0.640745	interferon, alpha-inducible protein 27 [Source:MGI Symbol;Acc:MGI:1277180]
Rbm3	0.564217	0	0.838	0.543	0	1.33455	0.739491	RNA binding motif (RNP1, RRM) protein 3 [Source:MGI Symbol;Acc:MGI:1099460]
Tmem176b	0.563074	0	0.931	0.704	0	1.77473	1.10846	transmembrane protein 176B [Source:MGI Symbol;Acc:MGI:1916348]
Tmsb4x	0.561098	0	1	1	0	5.1811	4.64946	thymosin, beta 4, X chromosome [Source:MGI Symbol;Acc:MGI:99510]
Kcnj15	0.555462	0	0.74	0.384	0	1.04654	0.493939	potassium inwardly-rectifying channel, subfamily J, member 15 [Source:MGI Symbol;Acc:MGI:1310000]
Cstb	0.554828	0	0.917	0.677	0	1.63855	1.00765	cystatin B [Source:MGI Symbol;Acc:MGI:109514]
Cycs	0.552602	0	0.808	0.471	0	1.20458	0.617634	cytochrome c, somatic [Source:MGI Symbol;Acc:MGI:88578]
Phgr1	0.548428	0	0.322	0.024	0	0.365402	0.0266553	proline/histidine/glycine-rich 1 [Source:MGI Symbol;Acc:MGI:1858382]
Snhg18	0.540912	0	0.606	0.261	0	0.789649	0.321554	small nucleolar RNA host gene 18 [Source:MGI Symbol;Acc:MGI:1914085]
Psme2	0.53689	0	0.755	0.406	0	1.06334	0.51875	proteasome (prosome, macropain) activator subunit 2 (PA28 beta) [Source:MGI Symbol;Acc:MGI:1096365]
Ppic	0.528338	0	0.794	0.465	0	1.16025	0.608696	peptidylprolyl isomerase C [Source:MGI Symbol;Acc:MGI:97751]
Fdx1	0.528267	0	0.775	0.446	0	1.11177	0.573866	ferredoxin 1 [Source:MGI Symbol;Acc:MGI:103224]
Sox9	0.524971	0	0.303	0.001	0	0.335607	0.00141661	SRY (sex determining region Y)-box 9 [Source:MGI Symbol;Acc:MGI:98371]
Tpm4	0.513822	0	0.727	0.379	0	1.00306	0.485143	tropomyosin 4 [Source:MGI Symbol;Acc:MGI:2449202]
Cxcl17	0.509445	0	0.619	0.237	0	0.841675	0.334639	chemokine (C-X-C motif) ligand 17 [Source:MGI Symbol;Acc:MGI:2387642]
Actg1	0.508973	0	0.993	0.95	0	2.82953	2.2242	actin, gamma, cytoplasmic 1 [Source:MGI Symbol;Acc:MGI:87906]
Uqcrq	0.508851	0	0.953	0.787	0	1.88532	1.27698	ubiquinol-cytochrome c reductase, complex III subunit VII [Source:MGI Symbol;Acc:MGI:107807]
Timm10b	0.508125	0	0.771	0.434	0	1.07138	0.548088	translocase of inner mitochondrial membrane 10B [Source:MGI Symbol;Acc:MGI:1315196]
Mt2	0.505192	0	0.839	0.511	0	1.7937	0.948996	metallothionein 2 [Source:MGI Symbol;Acc:MGI:97172]
Ckmt1	0.504429	0	0.457	0.101	0	0.506585	0.112733	creatine kinase, mitochondrial 1, ubiquitous [Source:MGI Symbol;Acc:MGI:99441]
AU021092	0.500529	0	0.628	0.264	0	0.781807	0.316048	expressed sequence AU021092 [Source:MGI Symbol;Acc:MGI:2146559]
Cd14	0.500523	0	0.388	0.072	0	0.432437	0.0796132	CD14 antigen [Source:MGI Symbol;Acc:MGI:88318]
Atp5g2	0.497629	0	0.957	0.812	0	1.93547	1.34877	ATP synthase, H+ transporting, mitochondrial F0 complex, subunit C2 (subunit 9) [Source:MGI Symbol;Acc:MGI:1915192]
Etfb	0.495444	0	0.897	0.686	0	1.58112	1.02132	electron transferring flavoprotein, beta polypeptide [Source:MGI Symbol;Acc:MGI:106098]
Psmb9	0.484146	0	0.425	0.094	0	0.470102	0.106372	proteasome (prosome, macropain) subunit, beta type 9 (large multifunctional peptidase 2) [Source:MGI Symbol;Acc:MGI:1346526]
Ilk	0.482083	0	0.487	0.156	0	0.565538	0.179476	integrin linked kinase [Source:MGI Symbol;Acc:MGI:1195267]
Atp5c1	0.475936	0	0.836	0.546	0	1.27722	0.739599	ATP synthase, H+ transporting, mitochondrial F1 complex, gamma polypeptide 1 [Source:MGI Symbol;Acc:MGI:1261437]
Nme1	0.475889	0	0.67	0.318	0	0.852607	0.387582	NME/NM23 nucleoside diphosphate kinase 1 [Source:MGI Symbol;Acc:MGI:97355]
Atp5b	0.460854	0	0.887	0.672	0	1.53085	0.998063	ATP synthase, H+ transporting mitochondrial F1 complex, beta subunit [Source:MGI Symbol;Acc:MGI:107801]
Atp5o	0.457848	0	0.885	0.67	0	1.49889	0.974424	ATP synthase, H+ transporting, mitochondrial F1 complex, O subunit [Source:MGI Symbol;Acc:MGI:106341]
Ybx1	0.450964	0	0.863	0.612	0	1.41767	0.888227	Y box protein 1 [Source:MGI Symbol;Acc:MGI:99146]
Cd63	0.450117	0	0.977	0.915	0	2.3798	1.86689	CD63 antigen [Source:MGI Symbol;Acc:MGI:99529]
Cox8a	0.450023	0	0.997	0.981	0	2.86969	2.36013	cytochrome c oxidase subunit 8A [Source:MGI Symbol;Acc:MGI:105959]
Uqcr10	0.448811	0	0.97	0.874	0	2.08407	1.54958	ubiquinol-cytochrome c reductase, complex III subunit X [Source:MGI Symbol;Acc:MGI:1913402]
Pfdn1	0.445652	0	0.781	0.444	0	1.06635	0.572836	prefoldin 1 [Source:MGI Symbol;Acc:MGI:1914449]
Cox6b1	0.441188	0	0.984	0.929	0	2.39181	1.87118	cytochrome c oxidase, subunit 6B1 [Source:MGI Symbol;Acc:MGI:107460]
Ndufa4	0.439995	0	0.985	0.931	0	2.37178	1.8584	Ndufa4, mitochondrial complex associated [Source:MGI Symbol;Acc:MGI:107686]
Atp5h	0.439917	0	0.978	0.906	0	2.21404	1.69595	ATP synthase, H+ transporting, mitochondrial F0 complex, subunit D [Source:MGI Symbol;Acc:MGI:1918929]
Mrpl33	0.43966	0	0.845	0.56	0	1.29622	0.778483	mitochondrial ribosomal protein L33 [Source:MGI Symbol;Acc:MGI:2137225]
Atox1	0.43898	0	0.97	0.875	0	2.09357	1.5777	antioxidant 1 copper chaperone [Source:MGI Symbol;Acc:MGI:1333855]
Ndufb5	0.43279	0	0.882	0.644	0	1.42956	0.918018	NADH:ubiquinone oxidoreductase subunit B5 [Source:MGI Symbol;Acc:MGI:1913296]
Itm2a	0.427131	0	0.275	0.029	0	0.304144	0.0316841	integral membrane protein 2A [Source:MGI Symbol;Acc:MGI:107706]
Ptges	0.42667	0	0.376	0.066	0	0.39066	0.0735088	prostaglandin E synthase [Source:MGI Symbol;Acc:MGI:1927593]
Pigr	0.421104	0	0.253	0.023	0	0.282152	0.0251455	polymeric immunoglobulin receptor [Source:MGI Symbol;Acc:MGI:103080]
Atp5j2	0.419425	0	0.978	0.912	0	2.23752	1.74805	ATP synthase, H+ transporting, mitochondrial F0 complex, subunit F2 [Source:MGI Symbol;Acc:MGI:1927558]
Cox7c	0.410669	0	0.985	0.931	0	2.35702	1.86788	cytochrome c oxidase subunit 7C [Source:MGI Symbol;Acc:MGI:103226]
Metrnl	0.407386	0	0.361	0.067	0	0.371179	0.0728205	meteorin, glial cell differentiation regulator-like [Source:MGI Symbol;Acc:MGI:2384806]
H2-Q6	0.406111	0	0.328	0.053	0	0.344563	0.0588159	histocompatibility 2, Q region locus 6 [Source:MGI Symbol;Acc:MGI:95935]
Minos1	0.40121	0	0.945	0.775	0	1.74094	1.22739	NA
St3gal4	0.400627	0	0.318	0.04	0	0.324296	0.0440699	ST3 beta-galactoside alpha-2,3-sialyltransferase 4 [Source:MGI Symbol;Acc:MGI:1316743]
Atp5k	0.390583	0	0.935	0.772	0	1.70028	1.22277	ATP synthase, H+ transporting, mitochondrial F1F0 complex, subunit E [Source:MGI Symbol;Acc:MGI:106636]
Uqcr11	0.388942	0	0.984	0.926	0	2.30856	1.84024	ubiquinol-cytochrome c reductase, complex III subunit XI [Source:MGI Symbol;Acc:MGI:1913844]
Uqcrb	0.386524	0	0.959	0.85	0	1.91129	1.447	ubiquinol-cytochrome c reductase binding protein [Source:MGI Symbol;Acc:MGI:1914780]
Shisa4	0.38472	0	0.303	0.04	0	0.309965	0.0439011	shisa family member 4 [Source:MGI Symbol;Acc:MGI:1924802]
Atp5l	0.378912	0	0.987	0.94	0	2.40729	1.95415	ATP synthase, H+ transporting, mitochondrial F0 complex, subunit G [Source:MGI Symbol;Acc:MGI:1351597]
Ppia	0.376765	0	0.998	0.991	0	3.1024	2.71019	peptidylprolyl isomerase A [Source:MGI Symbol;Acc:MGI:97749]
Ndufa13	0.370823	0	0.961	0.852	0	1.90565	1.44969	NADH:ubiquinone oxidoreductase subunit A13 [Source:MGI Symbol;Acc:MGI:1914434]
Cox6c	0.364558	0	0.995	0.98	0	2.78982	2.36892	cytochrome c oxidase subunit 6C [Source:MGI Symbol;Acc:MGI:104614]
Atp5e	0.36162	0	0.985	0.95	0	2.46093	2.03588	ATP synthase, H+ transporting, mitochondrial F1 complex, epsilon subunit [Source:MGI Symbol;Acc:MGI:1855697]
Slc5a1	0.359277	0	0.252	0.012	0	0.24885	0.0119033	solute carrier family 5 (sodium/glucose cotransporter), member 1 [Source:MGI Symbol;Acc:MGI:107678]
Fcer2a	0.355544	0	0.234	0.006	0	0.235125	0.00665112	Fc receptor, IgE, low affinity II, alpha polypeptide [Source:MGI Symbol;Acc:MGI:95497]
Atp5j	0.349706	0	0.968	0.873	0	1.98389	1.5449	ATP synthase, H+ transporting, mitochondrial F0 complex, subunit F [Source:MGI Symbol;Acc:MGI:107777]
Prdx1	0.349411	0	0.988	0.951	0	2.57081	2.14914	peroxiredoxin 1 [Source:MGI Symbol;Acc:MGI:99523]
Ndufa2	0.348267	0	0.977	0.912	0	2.16731	1.74281	NADH:ubiquinone oxidoreductase subunit A2 [Source:MGI Symbol;Acc:MGI:1343103]
Calm1	0.339891	0	0.971	0.868	0	2.2814	1.74337	calmodulin 1 [Source:MGI Symbol;Acc:MGI:88251]
Rps2	0.330956	0	0.994	0.981	0	2.76359	2.41711	ribosomal protein S2 [Source:MGI Symbol;Acc:MGI:105110]
Corin	0.318347	0	0.203	0.001	0	0.201287	0.000809927	corin, serine peptidase [Source:MGI Symbol;Acc:MGI:1349451]
H3f3b	0.312512	0	0.999	0.993	0	3.10496	2.72227	H3 histone, family 3B [Source:MGI Symbol;Acc:MGI:1101768]
Rps29	-0.246489	0	1	1	0	3.38693	3.63473	ribosomal protein S29 [Source:MGI Symbol;Acc:MGI:107681]
Rpl21	-0.277912	0	0.999	1	0	3.43132	3.69923	ribosomal protein L21 [Source:MGI Symbol;Acc:MGI:1278340]
Rpl34	-0.278247	0	0.992	0.993	0	2.65792	2.93303	ribosomal protein L34 [Source:MGI Symbol;Acc:MGI:1915686]
Rpl10	-0.286557	0	0.999	0.999	0	3.39733	3.68192	ribosomal protein L10 [Source:MGI Symbol;Acc:MGI:105943]
Rps28	-0.287993	0	0.992	0.986	0	2.71788	2.97916	ribosomal protein S28 [Source:MGI Symbol;Acc:MGI:1859516]
Tpt1	-0.319972	0	0.992	0.994	0	2.64892	2.96681	tumor protein, translationally-controlled 1 [Source:MGI Symbol;Acc:MGI:104890]
Eef1a1	-0.334659	0	0.992	0.993	0	2.65208	2.99561	eukaryotic translation elongation factor 1 alpha 1 [Source:MGI Symbol;Acc:MGI:1096881]
Rps27	-0.379731	0	0.997	0.999	0	3.27391	3.65738	ribosomal protein S27 [Source:MGI Symbol;Acc:MGI:1888676]
mt-Co1	-0.404073	0	1	1	0	3.99413	4.45039	mitochondrially encoded cytochrome c oxidase I [Source:MGI Symbol;Acc:MGI:102504]
Ftl1	-0.406618	0	0.999	1	0	3.08897	3.45351	ferritin light polypeptide 1 [Source:MGI Symbol;Acc:MGI:95589]
mt-Co2	-0.410937	0	0.997	0.999	0	2.83888	3.29497	mitochondrially encoded cytochrome c oxidase II [Source:MGI Symbol;Acc:MGI:102503]
mt-Atp6	-0.432725	0	1	1	0	3.88227	4.35872	mitochondrially encoded ATP synthase 6 [Source:MGI Symbol;Acc:MGI:99927]
Rpl10-ps3	-0.438592	0	0.867	0.909	0	1.37542	1.80554	ribosomal protein L10, pseudogene 3 [Source:MGI Symbol;Acc:MGI:3704336]
mt-Co3	-0.449957	0	1	1	0	3.86713	4.37034	mitochondrially encoded cytochrome c oxidase III [Source:MGI Symbol;Acc:MGI:102502]
mt-Cytb	-0.457807	0	0.999	1	0	3.40135	3.90806	mitochondrially encoded cytochrome b [Source:MGI Symbol;Acc:MGI:102501]
Malat1	-0.475982	0	1	1	0	5.17974	5.71134	metastasis associated lung adenocarcinoma transcript 1 (non-coding RNA) [Source:MGI Symbol;Acc:MGI:1919539]
mt-Nd1	-0.487556	0	0.998	1	0	2.97287	3.51119	mitochondrially encoded NADH dehydrogenase 1 [Source:MGI Symbol;Acc:MGI:101787]
mt-Nd5	-0.526344	0	0.683	0.813	0	0.863211	1.36343	mitochondrially encoded NADH dehydrogenase 5 [Source:MGI Symbol;Acc:MGI:102496]
Pla2g1b	-0.530683	0	0.789	0.861	0	1.22281	1.73286	phospholipase A2, group IB, pancreas [Source:MGI Symbol;Acc:MGI:101842]
Pon1	-0.545959	0	0.027	0.258	0	0.022121	0.339074	paraoxonase 1 [Source:MGI Symbol;Acc:MGI:103295]
Ramp1	-0.556497	0	0.468	0.677	0	0.53055	1.02054	receptor (calcitonin) activity modifying protein 1 [Source:MGI Symbol;Acc:MGI:1858418]
Sftpb	-0.563742	0	0.997	0.996	0	3.97906	4.55294	surfactant associated protein B [Source:MGI Symbol;Acc:MGI:109516]
Igfbp6	-0.574527	0	0.072	0.325	0	0.0690605	0.421258	insulin-like growth factor binding protein 6 [Source:MGI Symbol;Acc:MGI:96441]
Prdx6	-0.577952	0	0.824	0.904	0	1.26216	1.81639	peroxiredoxin 6 [Source:MGI Symbol;Acc:MGI:894320]
Nupr1	-0.591399	0	0.797	0.898	0	1.2892	1.93449	nuclear protein transcription regulator 1 [Source:MGI Symbol;Acc:MGI:1891834]
mt-Nd3	-0.613171	0	0.327	0.589	0	0.338424	0.831598	mitochondrially encoded NADH dehydrogenase 3 [Source:MGI Symbol;Acc:MGI:102499]
mt-Nd4	-0.622818	0	0.997	0.999	0	2.63711	3.32441	mitochondrially encoded NADH dehydrogenase 4 [Source:MGI Symbol;Acc:MGI:102498]
Cpm	-0.624441	0	0.324	0.577	0	0.341353	0.834324	carboxypeptidase M [Source:MGI Symbol;Acc:MGI:1917824]
AY036118	-0.650714	0	0.209	0.524	0	0.193789	0.691142	cDNA sequence AY036118 [Source:MGI Symbol;Acc:MGI:2158419]
Npw	-0.661545	0	0.477	0.719	0	0.535405	1.12227	neuropeptide W [Source:MGI Symbol;Acc:MGI:2685781]
Sepp1	-0.671234	0	0.7	0.857	0	0.938336	1.60069	NA
Selenbp1	-0.700589	0	0.611	0.795	0	0.757774	1.39707	selenium binding protein 1 [Source:MGI Symbol;Acc:MGI:96825]
Ang	-0.713691	0	0.355	0.639	0	0.375202	0.959674	angiogenin, ribonuclease, RNase A family, 5 [Source:MGI Symbol;Acc:MGI:88022]
Sftpc	-0.734956	0	1	1	0	6.61891	7.46297	surfactant associated protein C [Source:MGI Symbol;Acc:MGI:109517]
Errfi1	-0.744046	0	0.73	0.873	0	1.04921	1.7821	ERBB receptor feedback inhibitor 1 [Source:MGI Symbol;Acc:MGI:1921405]
Ces1d	-0.75872	0	0.424	0.718	0	0.475896	1.14223	carboxylesterase 1D [Source:MGI Symbol;Acc:MGI:2148202]
Cst8	-0.771619	0	0.067	0.404	0	0.0682345	0.573614	cystatin 8 (cystatin-related epididymal spermatogenic) [Source:MGI Symbol;Acc:MGI:107161]
Cat	-0.78586	0	0.366	0.677	0	0.375692	1.03138	catalase [Source:MGI Symbol;Acc:MGI:88271]
mt-Nd2	-0.897221	0	0.962	0.993	0	1.8873	2.84665	mitochondrially encoded NADH dehydrogenase 2 [Source:MGI Symbol;Acc:MGI:102500]
Lyz2	-0.899856	0	1	1	0	4.66787	5.72922	lysozyme 2 [Source:MGI Symbol;Acc:MGI:96897]
Jun	-0.901515	0	0.504	0.75	0	0.590071	1.3218	jun proto-oncogene [Source:MGI Symbol;Acc:MGI:96646]
Apoe	-0.970847	0	0.551	0.761	0	0.734192	1.53059	apolipoprotein E [Source:MGI Symbol;Acc:MGI:88057]
Rgcc	-0.999417	0	0.618	0.815	0	0.860123	1.72439	regulator of cell cycle [Source:MGI Symbol;Acc:MGI:1913464]
Rnase4	-1.04152	0	0.681	0.921	0	0.997014	2.09885	ribonuclease, RNase A family 4 [Source:MGI Symbol;Acc:MGI:1926217]
Gstm1	-1.04231	0	0.168	0.501	0	0.17798	0.787029	glutathione S-transferase, mu 1 [Source:MGI Symbol;Acc:MGI:95860]
Lyz1	-1.41441	0	0.623	0.903	0	1.02617	2.2398	lysozyme 1 [Source:MGI Symbol;Acc:MGI:96902]
Cbr2	-1.46617	0	0.821	0.991	0	1.57504	3.4307	carbonyl reductase 2 [Source:MGI Symbol;Acc:MGI:107200]
Bex2	-1.57431	0	0.091	0.692	0	0.102282	1.31689	brain expressed X-linked 2 [Source:MGI Symbol;Acc:MGI:1338017]
Ager	0.376901	4.07839e-304	0.975	0.877	7.70938e-300	2.42476	1.87923	advanced glycosylation end product-specific receptor [Source:MGI Symbol;Acc:MGI:893592]
Mrpl17	0.447974	1.03829e-301	0.618	0.281	1.96267e-297	0.752135	0.33219	mitochondrial ribosomal protein L17 [Source:MGI Symbol;Acc:MGI:1351608]
Cfl1	0.433237	9.9913e-301	0.886	0.661	1.88866e-296	1.495	0.982202	cofilin 1, non-muscle [Source:MGI Symbol;Acc:MGI:101757]
Slc6a20a	0.346687	2.95463e-300	0.274	0.034	5.58514e-296	0.274988	0.0380714	solute carrier family 6 (neurotransmitter transporter), member 20A [Source:MGI Symbol;Acc:MGI:2143217]
Rps21	-0.311882	2.81924e-299	0.982	0.984	5.32921e-295	2.27444	2.58269	ribosomal protein S21 [Source:MGI Symbol;Acc:MGI:1913731]
Mia	0.430706	1.69745e-298	0.384	0.099	3.20869e-294	0.419794	0.109209	melanoma inhibitory activity [Source:MGI Symbol;Acc:MGI:109615]
Guca2a	0.340216	2.38045e-298	0.199	0.002	4.49977e-294	0.208405	0.00251963	guanylate cyclase activator 2a (guanylin) [Source:MGI Symbol;Acc:MGI:102738]
Acsl4	0.474696	3.9066e-297	0.829	0.551	7.38465e-293	1.28481	0.76732	acyl-CoA synthetase long-chain family member 4 [Source:MGI Symbol;Acc:MGI:1354713]
Fos	-0.893677	1.13479e-296	0.423	0.642	2.14509e-292	0.532545	1.16379	FBJ osteosarcoma oncogene [Source:MGI Symbol;Acc:MGI:95574]
Krt7	0.584917	1.29757e-291	0.564	0.234	2.4528e-287	0.751991	0.301661	keratin 7 [Source:MGI Symbol;Acc:MGI:96704]
Scd1	-0.687646	1.56652e-291	0.964	0.961	2.96119e-287	2.39881	2.98037	stearoyl-Coenzyme A desaturase 1 [Source:MGI Symbol;Acc:MGI:98239]
Clip4	0.410396	1.66672e-291	0.438	0.135	3.1506e-287	0.476588	0.152362	CAP-GLY domain containing linker protein family, member 4 [Source:MGI Symbol;Acc:MGI:1919100]
Ndufb9	0.390979	1.40722e-290	0.892	0.685	2.66007e-286	1.46935	0.998959	NADH:ubiquinone oxidoreductase subunit B9 [Source:MGI Symbol;Acc:MGI:1913468]
Anxa1	0.494346	1.15003e-289	0.573	0.231	2.17389e-285	0.770025	0.329095	annexin A1 [Source:MGI Symbol;Acc:MGI:96819]
Txnip	0.431537	3.56454e-289	0.592	0.248	6.73805e-285	0.743251	0.326652	thioredoxin interacting protein [Source:MGI Symbol;Acc:MGI:1889549]
Smdt1	0.363895	3.74649e-289	0.927	0.744	7.08199e-285	1.62149	1.1563	single-pass membrane protein with aspartate rich tail 1 [Source:MGI Symbol;Acc:MGI:1916279]
Lpcat1	-0.513114	3.74096e-287	0.769	0.837	7.07154e-283	1.10286	1.57349	lysophosphatidylcholine acyltransferase 1 [Source:MGI Symbol;Acc:MGI:2384812]
Rps27l	0.401709	3.67855e-285	0.949	0.829	6.95357e-281	1.88254	1.41544	ribosomal protein S27-like [Source:MGI Symbol;Acc:MGI:1915191]
Tceb2	0.37145	1.94237e-284	0.955	0.841	3.67166e-280	1.89855	1.44959	NA
Sec11c	0.445041	8.58822e-284	0.722	0.401	1.62343e-279	0.967564	0.508062	SEC11 homolog C, signal peptidase complex subunit [Source:MGI Symbol;Acc:MGI:1913536]
Atpif1	0.300001	4.099e-282	0.968	0.873	7.74834e-278	2.05837	1.62214	ATPase inhibitory factor 1 [Source:MGI Symbol;Acc:MGI:1196457]
Herpud1	-0.557595	1.83111e-279	0.393	0.61	3.46134e-275	0.428526	0.886072	homocysteine-inducible, endoplasmic reticulum stress-inducible, ubiquitin-like domain member 1 [Source:MGI Symbol;Acc:MGI:1927406]
Tagln2	0.386443	3.0968e-279	0.951	0.827	5.85387e-275	1.95113	1.46991	transgelin 2 [Source:MGI Symbol;Acc:MGI:1312985]
Socs2	0.454774	1.45389e-277	0.858	0.611	2.74828e-273	1.39083	0.88282	suppressor of cytokine signaling 2 [Source:MGI Symbol;Acc:MGI:1201787]
Rnaset2b	0.425132	4.75316e-276	0.774	0.469	8.98491e-272	1.06769	0.606416	ribonuclease T2B [Source:MGI Symbol;Acc:MGI:3702087]
Sec61g	0.354807	3.04672e-275	0.979	0.935	5.75921e-271	2.32548	1.92934	SEC61, gamma subunit [Source:MGI Symbol;Acc:MGI:1202066]
Dynll1	0.21676	2.19973e-272	0.95	0.812	4.15815e-268	1.96369	1.486	dynein light chain LC8-type 1 [Source:MGI Symbol;Acc:MGI:1861457]
Atp5g1	0.394477	1.81124e-270	0.883	0.66	3.42379e-266	1.42754	0.957289	ATP synthase, H+ transporting, mitochondrial F0 complex, subunit C1 (subunit 9) [Source:MGI Symbol;Acc:MGI:107653]
H2-Q4	0.388542	1.99021e-269	0.455	0.154	3.76209e-265	0.506199	0.182713	histocompatibility 2, Q region locus 4 [Source:MGI Symbol;Acc:MGI:95933]
Slc34a2	-0.35888	7.22435e-269	0.961	0.945	1.36562e-264	2.57616	2.91992	solute carrier family 34 (sodium phosphate), member 2 [Source:MGI Symbol;Acc:MGI:1342284]
Sec61b	0.392581	3.97176e-266	0.953	0.868	7.50782e-262	1.99469	1.55853	Sec61 beta subunit [Source:MGI Symbol;Acc:MGI:1913462]
Neat1	-0.492796	1.44833e-265	0.636	0.778	2.73778e-261	0.830661	1.30201	nuclear paraspeckle assembly transcript 1 (non-protein coding) [Source:MGI Symbol;Acc:MGI:1914211]
Ptpn18	0.37374	5.21492e-264	0.406	0.125	9.85776e-260	0.43065	0.138926	protein tyrosine phosphatase, non-receptor type 18 [Source:MGI Symbol;Acc:MGI:108410]
Clic1	0.433986	2.26786e-263	0.827	0.566	4.28693e-259	1.27594	0.791796	chloride intracellular channel 1 [Source:MGI Symbol;Acc:MGI:2148924]
Chil4	0.912845	3.72021e-263	0.172	0	7.03231e-259	0.215651	0	chitinase-like 4 [Source:MGI Symbol;Acc:MGI:1341098]
Fosb	-0.524574	2.66496e-260	0.036	0.238	5.03757e-256	0.0363166	0.323056	FBJ osteosarcoma oncogene B [Source:MGI Symbol;Acc:MGI:95575]
Dynlt3	0.390619	2.32417e-259	0.639	0.31	4.39338e-255	0.764977	0.374558	dynein light chain Tctex-type 3 [Source:MGI Symbol;Acc:MGI:1914367]
Cox6a1	0.302229	3.658e-259	0.971	0.893	6.91472e-255	2.04358	1.65467	cytochrome c oxidase subunit 6A1 [Source:MGI Symbol;Acc:MGI:103099]
Mapk13	0.358633	2.20276e-258	0.429	0.141	4.16388e-254	0.453437	0.159067	mitogen-activated protein kinase 13 [Source:MGI Symbol;Acc:MGI:1346864]
St3gal6	0.359667	4.18858e-258	0.419	0.134	7.91768e-254	0.444364	0.152749	ST3 beta-galactoside alpha-2,3-sialyltransferase 6 [Source:MGI Symbol;Acc:MGI:1888707]
Me1	0.40493	2.47619e-257	0.608	0.285	4.68074e-253	0.728807	0.343777	malic enzyme 1, NADP(+)-dependent, cytosolic [Source:MGI Symbol;Acc:MGI:97043]
Cks2	0.531859	3.40059e-257	0.269	0.047	6.42813e-253	0.350245	0.0608701	CDC28 protein kinase regulatory subunit 2 [Source:MGI Symbol;Acc:MGI:1913447]
Ndufc2	0.331067	4.7582e-256	0.949	0.831	8.99443e-252	1.84278	1.42116	NADH:ubiquinone oxidoreductase subunit C2 [Source:MGI Symbol;Acc:MGI:1344370]
Ndufb6	0.394575	1.38295e-255	0.766	0.464	2.6142e-251	1.03203	0.595779	NADH:ubiquinone oxidoreductase subunit B6 [Source:MGI Symbol;Acc:MGI:2684983]
Jund	-0.445469	4.97646e-255	0.855	0.894	9.40701e-251	1.33123	1.74213	jun D proto-oncogene [Source:MGI Symbol;Acc:MGI:96648]
Sh3bgrl3	0.421202	2.59615e-254	0.845	0.595	4.90751e-250	1.34431	0.859542	SH3 domain binding glutamic acid-rich protein-like 3 [Source:MGI Symbol;Acc:MGI:1920973]
Snx7	0.383447	2.68938e-252	0.533	0.223	5.08374e-248	0.604757	0.260121	sorting nexin 7 [Source:MGI Symbol;Acc:MGI:1923811]
Bex4	-0.504757	4.16587e-252	0.744	0.818	7.87474e-248	1.09953	1.56102	brain expressed X-linked 4 [Source:MGI Symbol;Acc:MGI:3606746]
Ndufc1	0.361005	1.61845e-251	0.894	0.676	3.05936e-247	1.45255	0.99892	NADH:ubiquinone oxidoreductase subunit C1 [Source:MGI Symbol;Acc:MGI:1913627]
Ndufab1	0.371927	3.61724e-248	0.812	0.536	6.83766e-244	1.16469	0.722043	NADH:ubiquinone oxidoreductase subunit AB1 [Source:MGI Symbol;Acc:MGI:1917566]
Atp5g3	0.387711	1.00091e-247	0.827	0.566	1.89202e-243	1.22584	0.77577	ATP synthase, H+ transporting, mitochondrial F0 complex, subunit C3 (subunit 9) [Source:MGI Symbol;Acc:MGI:2442035]
Scd2	-0.579435	1.57075e-247	0.547	0.687	2.96918e-243	0.641605	1.10695	stearoyl-Coenzyme A desaturase 2 [Source:MGI Symbol;Acc:MGI:98240]
Rpl14	-0.242958	3.4982e-244	0.992	0.994	6.61264e-240	2.66569	2.90505	ribosomal protein L14 [Source:MGI Symbol;Acc:MGI:1914365]
Ctsc	0.428876	1.40854e-243	0.919	0.771	2.66257e-239	1.83325	1.3423	cathepsin C [Source:MGI Symbol;Acc:MGI:109553]
Birc5	0.441757	9.78276e-241	0.184	0.01	1.84924e-236	0.241236	0.0150602	baculoviral IAP repeat-containing 5 [Source:MGI Symbol;Acc:MGI:1203517]
Pdlim1	0.410123	1.27234e-239	0.616	0.305	2.4051e-235	0.768422	0.379112	PDZ and LIM domain 1 (elfin) [Source:MGI Symbol;Acc:MGI:1860611]
Acoxl	-0.488611	4.25842e-238	0.128	0.354	8.04969e-234	0.127427	0.453828	acyl-Coenzyme A oxidase-like [Source:MGI Symbol;Acc:MGI:1921371]
Gas6	-0.518859	2.39535e-235	0.308	0.522	4.52792e-231	0.318309	0.714768	growth arrest specific 6 [Source:MGI Symbol;Acc:MGI:95660]
Actb	0.488176	4.34815e-235	0.997	0.975	8.21931e-231	3.0725	2.58273	actin, beta [Source:MGI Symbol;Acc:MGI:87904]
Cd44	0.45977	7.07726e-235	0.493	0.205	1.33781e-230	0.590019	0.241207	CD44 antigen [Source:MGI Symbol;Acc:MGI:88338]
Tpm1	0.391294	2.93993e-234	0.853	0.606	5.55735e-230	1.33779	0.876732	tropomyosin 1, alpha [Source:MGI Symbol;Acc:MGI:98809]
Col14a1	0.292258	3.38996e-234	0.163	0.003	6.40804e-230	0.174548	0.00454068	collagen, type XIV, alpha 1 [Source:MGI Symbol;Acc:MGI:1341272]
Psme1	0.370657	4.8152e-233	0.83	0.581	9.10218e-229	1.24807	0.80945	proteasome (prosome, macropain) activator subunit 1 (PA28 alpha) [Source:MGI Symbol;Acc:MGI:1096367]
Gpx4	0.279952	9.92223e-232	0.986	0.965	1.8756e-227	2.56026	2.24386	glutathione peroxidase 4 [Source:MGI Symbol;Acc:MGI:104767]
Calm3	0.355718	1.05933e-230	0.473	0.186	2.00246e-226	0.524245	0.217462	calmodulin 3 [Source:MGI Symbol;Acc:MGI:103249]
Cyc1	0.363962	1.20142e-230	0.608	0.3	2.27105e-226	0.716411	0.357605	cytochrome c-1 [Source:MGI Symbol;Acc:MGI:1913695]
Hp	-0.40376	4.69483e-230	0.733	0.842	8.87465e-226	1.15071	1.6237	haptoglobin [Source:MGI Symbol;Acc:MGI:96211]
Psmb1	0.37026	3.35296e-229	0.844	0.614	6.33811e-225	1.28818	0.858619	proteasome (prosome, macropain) subunit, beta type 1 [Source:MGI Symbol;Acc:MGI:104884]
Lockd	0.428322	1.38788e-228	0.191	0.017	2.62351e-224	0.251181	0.0242197	lncRNA downstream of Cdkn1b [Source:MGI Symbol;Acc:MGI:1915081]
mt-Nd4l	-0.499884	6.01764e-227	0.354	0.552	1.13751e-222	0.366762	0.759778	mitochondrially encoded NADH dehydrogenase 4L [Source:MGI Symbol;Acc:MGI:102497]
Lsm4	0.380696	1.19636e-226	0.625	0.318	2.26149e-222	0.758433	0.387376	LSM4 homolog, U6 small nuclear RNA and mRNA degradation associated [Source:MGI Symbol;Acc:MGI:1354692]
Cks1b	0.468408	1.3788e-225	0.263	0.056	2.60634e-221	0.333857	0.0668009	CDC28 protein kinase 1b [Source:MGI Symbol;Acc:MGI:1889208]
Nme7	0.271489	4.3868e-225	0.236	0.038	8.29236e-221	0.23044	0.0433375	NME/NM23 family member 7 [Source:MGI Symbol;Acc:MGI:2449121]
Ndufs6	0.342723	7.14041e-224	0.878	0.674	1.34975e-219	1.40129	0.981849	NADH:ubiquinone oxidoreductase core subunit S6 [Source:MGI Symbol;Acc:MGI:107932]
Rgs10	0.39974	1.00141e-223	0.528	0.238	1.89296e-219	0.628037	0.284668	regulator of G-protein signalling 10 [Source:MGI Symbol;Acc:MGI:1915115]
Nsmce1	0.345909	2.05848e-223	0.471	0.186	3.89114e-219	0.511936	0.21472	NSE1 homolog, SMC5-SMC6 complex component [Source:MGI Symbol;Acc:MGI:1914961]
Ldha	0.367242	4.62736e-223	0.871	0.669	8.74711e-219	1.43473	0.998076	lactate dehydrogenase A [Source:MGI Symbol;Acc:MGI:96759]
Sod2	0.394605	3.35514e-221	0.724	0.431	6.34222e-217	0.982255	0.564917	superoxide dismutase 2, mitochondrial [Source:MGI Symbol;Acc:MGI:98352]
Tpp1	0.361652	1.57751e-218	0.528	0.236	2.98196e-214	0.606786	0.281339	tripeptidyl peptidase I [Source:MGI Symbol;Acc:MGI:1336194]
Cox7b	0.328161	3.54214e-218	0.919	0.78	6.69571e-214	1.66367	1.25789	cytochrome c oxidase subunit 7B [Source:MGI Symbol;Acc:MGI:1913392]
Ndufb8	0.35964	1.41879e-217	0.833	0.612	2.68193e-213	1.26468	0.850141	NADH:ubiquinone oxidoreductase subunit B8 [Source:MGI Symbol;Acc:MGI:1914514]
Ndufa12	0.345452	1.71664e-217	0.829	0.585	3.24497e-213	1.22681	0.809386	NADH:ubiquinone oxidoreductase subunit A12 [Source:MGI Symbol;Acc:MGI:1913664]
Mdh2	0.364625	1.72057e-217	0.699	0.407	3.25239e-213	0.901604	0.512412	malate dehydrogenase 2, NAD (mitochondrial) [Source:MGI Symbol;Acc:MGI:97050]
Gstt2	0.314549	3.27451e-217	0.412	0.147	6.1898e-213	0.42592	0.164796	glutathione S-transferase, theta 2 [Source:MGI Symbol;Acc:MGI:106188]
Apobec3	0.317745	5.78213e-217	0.37	0.12	1.093e-212	0.385393	0.135358	apolipoprotein B mRNA editing enzyme, catalytic polypeptide 3 [Source:MGI Symbol;Acc:MGI:1933111]
Brd7	0.362064	8.13578e-217	0.63	0.321	1.53791e-212	0.759504	0.39639	bromodomain containing 7 [Source:MGI Symbol;Acc:MGI:1349766]
Aldh2	-0.44584	3.16164e-216	0.578	0.699	5.97645e-212	0.666632	1.05092	aldehyde dehydrogenase 2, mitochondrial [Source:MGI Symbol;Acc:MGI:99600]
Scgb1c1	-0.538295	1.03398e-215	0.262	0.469	1.95453e-211	0.270028	0.654631	secretoglobin, family 1C, member 1 [Source:MGI Symbol;Acc:MGI:2655401]
Zdhhc3	-0.636865	2.15143e-215	0.483	0.631	4.06685e-211	0.553646	1.00945	zinc finger, DHHC domain containing 3 [Source:MGI Symbol;Acc:MGI:1926134]
Il4i1	0.351141	2.50615e-215	0.156	0.005	4.73738e-211	0.182943	0.0066702	interleukin 4 induced 1 [Source:MGI Symbol;Acc:MGI:109552]
Usmg5	0.308142	3.82113e-215	0.908	0.722	7.22308e-211	1.55519	1.13396	NA
Egr1	-0.726817	3.20482e-214	0.125	0.34	6.05807e-210	0.145733	0.529284	early growth response 1 [Source:MGI Symbol;Acc:MGI:95295]
2700094K13Rik	0.477959	7.26921e-214	0.76	0.501	1.3741e-209	1.11662	0.667142	NA
Cybrd1	0.241271	8.50043e-214	0.196	0.022	1.60684e-209	0.186344	0.0250878	cytochrome b reductase 1 [Source:MGI Symbol;Acc:MGI:2654575]
Dusp1	-0.574753	1.19066e-213	0.418	0.596	2.2507e-209	0.488163	0.93441	dual specificity phosphatase 1 [Source:MGI Symbol;Acc:MGI:105120]
Psmb2	0.367589	2.34158e-213	0.713	0.423	4.4263e-209	0.922179	0.531974	proteasome (prosome, macropain) subunit, beta type 2 [Source:MGI Symbol;Acc:MGI:1347045]
Ccl20	1.05534	2.75945e-213	0.163	0.009	5.21619e-209	0.264751	0.0128422	chemokine (C-C motif) ligand 20 [Source:MGI Symbol;Acc:MGI:1329031]
Hemk1	0.262765	5.7877e-213	0.243	0.046	1.09405e-208	0.235707	0.0507836	HemK methyltransferase family member 1 [Source:MGI Symbol;Acc:MGI:1916786]
Cebpa	-0.496508	3.63399e-212	0.395	0.573	6.86934e-208	0.423668	0.81511	CCAAT/enhancer binding protein (C/EBP), alpha [Source:MGI Symbol;Acc:MGI:99480]
Sdhb	0.3488	7.79199e-211	0.641	0.343	1.47292e-206	0.76695	0.41222	succinate dehydrogenase complex, subunit B, iron sulfur (Ip) [Source:MGI Symbol;Acc:MGI:1914930]
Ndufa5	0.36987	1.13534e-210	0.78	0.512	2.14614e-206	1.08446	0.675485	NADH:ubiquinone oxidoreductase subunit A5 [Source:MGI Symbol;Acc:MGI:1915452]
Atp1b1	0.339944	1.48564e-210	0.964	0.898	2.80831e-206	2.17719	1.78756	ATPase, Na+/K+ transporting, beta 1 polypeptide [Source:MGI Symbol;Acc:MGI:88108]
Rpl37	-0.191811	2.61126e-210	0.997	0.998	4.93607e-206	3.13825	3.33965	ribosomal protein L37 [Source:MGI Symbol;Acc:MGI:1914531]
Ndufs4	0.336842	2.88334e-210	0.599	0.297	5.45039e-206	0.693443	0.356576	NADH:ubiquinone oxidoreductase core subunit S4 [Source:MGI Symbol;Acc:MGI:1343135]
Ube2l3	0.340289	3.60231e-210	0.59	0.288	6.80944e-206	0.677325	0.343884	ubiquitin-conjugating enzyme E2L 3 [Source:MGI Symbol;Acc:MGI:109240]
Kcnmb2	0.246667	2.11978e-209	0.232	0.04	4.00702e-205	0.229169	0.0509514	potassium large conductance calcium-activated channel, subfamily M, beta member 2 [Source:MGI Symbol;Acc:MGI:1919663]
Lpp	0.313155	4.41298e-209	0.406	0.145	8.34185e-205	0.425306	0.167552	LIM domain containing preferred translocation partner in lipoma [Source:MGI Symbol;Acc:MGI:2441849]
Ngfrap1	0.366472	5.37957e-209	0.815	0.563	1.0169e-204	1.21484	0.788002	NA
Prdx3	0.331538	1.22883e-208	0.508	0.224	2.32286e-204	0.554299	0.255755	peroxiredoxin 3 [Source:MGI Symbol;Acc:MGI:88034]
Slc25a4	0.349069	3.26855e-207	0.709	0.423	6.17854e-203	0.933489	0.546606	solute carrier family 25 (mitochondrial carrier, adenine nucleotide translocator), member 4 [Source:MGI Symbol;Acc:MGI:1353495]
Tmem30a	0.359316	4.25392e-206	0.753	0.467	8.04118e-202	1.01727	0.615896	transmembrane protein 30A [Source:MGI Symbol;Acc:MGI:106402]
Rpl36	-0.217323	1.93873e-205	0.992	0.993	3.66478e-201	2.73788	2.95506	ribosomal protein L36 [Source:MGI Symbol;Acc:MGI:1860603]
Pmepa1	0.291481	6.88997e-205	0.311	0.087	1.30241e-200	0.32261	0.103893	prostate transmembrane protein, androgen induced 1 [Source:MGI Symbol;Acc:MGI:1929600]
2010107E04Rik	0.308448	2.39116e-202	0.913	0.739	4.52002e-198	1.53562	1.13579	NA
Gpx1	0.327742	3.67772e-202	0.934	0.806	6.95199e-198	1.8026	1.39243	glutathione peroxidase 1 [Source:MGI Symbol;Acc:MGI:104887]
Rpl7	-0.237088	8.11367e-202	0.984	0.988	1.53373e-197	2.34073	2.58464	ribosomal protein L7 [Source:MGI Symbol;Acc:MGI:98073]
Ceacam1	0.29199	3.21735e-201	0.269	0.066	6.08176e-197	0.270761	0.0700999	carcinoembryonic antigen-related cell adhesion molecule 1 [Source:MGI Symbol;Acc:MGI:1347245]
S100a1	0.346341	3.28565e-201	0.897	0.717	6.21087e-197	1.57697	1.14066	S100 calcium binding protein A1 [Source:MGI Symbol;Acc:MGI:1338917]
A230065H16Rik	0.442261	4.62858e-201	0.139	0.002	8.7494e-197	0.175722	0.00246392	NA
Arl6ip1	0.396719	5.89065e-199	0.91	0.767	1.11351e-194	1.69423	1.26235	ADP-ribosylation factor-like 6 interacting protein 1 [Source:MGI Symbol;Acc:MGI:1858943]
Akr1b8	0.268796	8.39276e-199	0.314	0.091	1.58648e-194	0.313575	0.104626	aldo-keto reductase family 1, member B8 [Source:MGI Symbol;Acc:MGI:107673]
Avpi1	0.321449	1.11874e-198	0.883	0.682	2.11476e-194	1.41765	1.01245	arginine vasopressin-induced 1 [Source:MGI Symbol;Acc:MGI:1916784]
Vmp1	0.35448	1.75848e-198	0.622	0.326	3.32406e-194	0.744168	0.397981	vacuole membrane protein 1 [Source:MGI Symbol;Acc:MGI:1923159]
Coq7	0.304515	2.42496e-198	0.433	0.17	4.58391e-194	0.453828	0.193262	demethyl-Q 7 [Source:MGI Symbol;Acc:MGI:107207]
Glul	-0.5083	1.53098e-197	0.279	0.469	2.89402e-193	0.278341	0.639101	glutamate-ammonia ligase (glutamine synthetase) [Source:MGI Symbol;Acc:MGI:95739]
Prdx2	0.335513	1.72392e-197	0.821	0.577	3.25872e-193	1.19809	0.796029	peroxiredoxin 2 [Source:MGI Symbol;Acc:MGI:109486]
Uqcrh	0.254645	1.91323e-197	0.976	0.926	3.61657e-193	2.15877	1.84084	ubiquinol-cytochrome c reductase hinge protein [Source:MGI Symbol;Acc:MGI:1913826]
Mrpl42	0.334188	2.14873e-197	0.623	0.331	4.06175e-193	0.747492	0.405455	mitochondrial ribosomal protein L42 [Source:MGI Symbol;Acc:MGI:1333774]
Panct2	0.231727	1.22505e-196	0.174	0.017	2.31572e-192	0.167257	0.0191796	pluripotency-associated noncoding transcript 2 [Source:MGI Symbol;Acc:MGI:3643517]
Mrps9	0.347374	2.70917e-196	0.464	0.2	5.12115e-192	0.532597	0.238656	mitochondrial ribosomal protein S9 [Source:MGI Symbol;Acc:MGI:1916777]
Hmgn1	0.356434	3.84469e-196	0.912	0.774	7.26762e-192	1.67594	1.26632	high mobility group nucleosomal binding domain 1 [Source:MGI Symbol;Acc:MGI:96120]
Bsg	0.260523	1.38736e-194	0.973	0.917	2.62253e-190	2.08104	1.75795	basigin [Source:MGI Symbol;Acc:MGI:88208]
Hibadh	0.331114	2.31577e-191	0.547	0.27	4.3775e-187	0.631212	0.319849	3-hydroxyisobutyrate dehydrogenase [Source:MGI Symbol;Acc:MGI:1889802]
Snrpd1	0.345983	6.95883e-191	0.532	0.258	1.31543e-186	0.619046	0.306584	small nuclear ribonucleoprotein D1 [Source:MGI Symbol;Acc:MGI:98344]
Ccnd1	0.352871	1.97827e-190	0.516	0.243	3.73953e-186	0.609233	0.29739	cyclin D1 [Source:MGI Symbol;Acc:MGI:88313]
Ube2c	0.533167	7.01739e-190	0.161	0.014	1.3265e-185	0.234535	0.0233219	ubiquitin-conjugating enzyme E2C [Source:MGI Symbol;Acc:MGI:1915862]
Pbld2	0.232873	8.35036e-190	0.198	0.031	1.57847e-185	0.188229	0.0330096	phenazine biosynthesis-like protein domain containing 2 [Source:MGI Symbol;Acc:MGI:1914557]
2810417H13Rik	0.488274	2.24621e-189	0.14	0.005	4.24601e-185	0.211757	0.00612584	NA
Lgi3	-0.443396	4.86081e-189	0.56	0.678	9.1884e-185	0.659376	1.03375	leucine-rich repeat LGI family, member 3 [Source:MGI Symbol;Acc:MGI:2182619]
Psma4	0.334032	1.30248e-188	0.588	0.308	2.46208e-184	0.696843	0.371067	proteasome (prosome, macropain) subunit, alpha type 4 [Source:MGI Symbol;Acc:MGI:1347060]
Ndufb7	0.314025	1.06239e-187	0.875	0.676	2.00824e-183	1.36087	0.975439	NADH:ubiquinone oxidoreductase subunit B7 [Source:MGI Symbol;Acc:MGI:1914166]
Ap2s1	0.324716	6.45087e-187	0.685	0.395	1.21941e-182	0.838805	0.488876	adaptor-related protein complex 2, sigma 1 subunit [Source:MGI Symbol;Acc:MGI:2141861]
Fam96a	0.31156	2.29451e-186	0.492	0.224	4.33731e-182	0.537673	0.257259	NA
Krt8	0.364623	7.70269e-186	0.761	0.481	1.45604e-181	1.15979	0.72523	keratin 8 [Source:MGI Symbol;Acc:MGI:96705]
Hint1	0.25925	2.20324e-185	0.952	0.848	4.16478e-181	1.84541	1.4841	histidine triad nucleotide binding protein 1 [Source:MGI Symbol;Acc:MGI:1321133]
1110008P14Rik	0.333084	1.0868e-184	0.718	0.445	2.05438e-180	0.932012	0.567585	RIKEN cDNA 1110008P14 gene [Source:MGI Symbol;Acc:MGI:1920987]
Serf2	0.233882	1.35174e-184	0.988	0.96	2.5552e-180	2.40595	2.11433	small EDRK-rich factor 2 [Source:MGI Symbol;Acc:MGI:1337041]
Lap3	0.272763	2.59452e-182	0.336	0.113	4.90443e-178	0.335424	0.123602	leucine aminopeptidase 3 [Source:MGI Symbol;Acc:MGI:1914238]
Malt1	0.213796	7.6382e-182	0.159	0.015	1.44385e-177	0.151185	0.0159255	MALT1 paracaspase [Source:MGI Symbol;Acc:MGI:2445027]
Ifngr2	0.253164	1.00458e-181	0.237	0.054	1.89896e-177	0.234605	0.0595737	interferon gamma receptor 2 [Source:MGI Symbol;Acc:MGI:107654]
Pcx	0.259574	1.02055e-181	0.273	0.075	1.92914e-177	0.271327	0.0833775	pyruvate carboxylase [Source:MGI Symbol;Acc:MGI:97520]
Cd9	0.280612	3.54221e-181	0.946	0.859	6.69584e-177	2.00812	1.62727	CD9 antigen [Source:MGI Symbol;Acc:MGI:88348]
Rps27rt	-0.384829	7.47203e-181	0.701	0.763	1.41244e-176	0.880415	1.21293	ribosomal protein S27, retrogene [Source:MGI Symbol;Acc:MGI:3704345]
Atp5d	0.26252	2.94847e-180	0.954	0.851	5.5735e-176	1.82097	1.47543	ATP synthase, H+ transporting, mitochondrial F1 complex, delta subunit [Source:MGI Symbol;Acc:MGI:1913293]
Arpc1b	0.332678	1.99211e-178	0.709	0.431	3.76568e-174	0.9116	0.551737	actin related protein 2/3 complex, subunit 1B [Source:MGI Symbol;Acc:MGI:1343142]
Ndufa7	0.254933	9.18123e-178	0.965	0.888	1.73553e-173	1.99134	1.66117	NADH:ubiquinone oxidoreductase subunit A7 [Source:MGI Symbol;Acc:MGI:1913666]
Bambi	-0.459272	3.09379e-177	0.164	0.352	5.84819e-173	0.157647	0.455566	BMP and activin membrane-bound inhibitor [Source:MGI Symbol;Acc:MGI:1915260]
Psma3	0.320115	3.61588e-176	0.767	0.506	6.8351e-172	1.04869	0.675036	proteasome (prosome, macropain) subunit, alpha type 3 [Source:MGI Symbol;Acc:MGI:104883]
Trappc1	0.28413	4.51361e-176	0.48	0.216	8.53208e-172	0.511953	0.249752	trafficking protein particle complex 1 [Source:MGI Symbol;Acc:MGI:1098727]
Fuom	0.282437	1.04805e-175	0.391	0.153	1.98113e-171	0.413383	0.177472	fucose mutarotase [Source:MGI Symbol;Acc:MGI:1916314]
Psmb10	0.28776	1.07237e-173	0.351	0.128	2.0271e-169	0.365603	0.144177	proteasome (prosome, macropain) subunit, beta type 10 [Source:MGI Symbol;Acc:MGI:1096380]
Cenpm	0.246816	2.51672e-173	0.136	0.008	4.75735e-169	0.148701	0.00842747	centromere protein M [Source:MGI Symbol;Acc:MGI:1913820]
Lrg1	0.309453	3.86555e-173	0.736	0.472	7.30705e-169	1.2687	0.807903	leucine-rich alpha-2-glycoprotein 1 [Source:MGI Symbol;Acc:MGI:1924155]
Ubc	-0.44149	5.74029e-173	0.744	0.802	1.08509e-168	1.03317	1.39846	ubiquitin C [Source:MGI Symbol;Acc:MGI:98889]
Edf1	0.285696	2.89738e-172	0.897	0.728	5.47692e-168	1.47436	1.10737	endothelial differentiation-related factor 1 [Source:MGI Symbol;Acc:MGI:1891227]
Yipf6	0.290242	3.14466e-172	0.463	0.207	5.94436e-168	0.503808	0.243607	Yip1 domain family, member 6 [Source:MGI Symbol;Acc:MGI:1925179]
Cdca3	0.319997	4.76709e-172	0.14	0.01	9.01123e-168	0.177822	0.0126737	cell division cycle associated 3 [Source:MGI Symbol;Acc:MGI:1315198]
Gfer	0.25627	4.87423e-172	0.311	0.102	9.21376e-168	0.307109	0.111607	growth factor, augmenter of liver regeneration [Source:MGI Symbol;Acc:MGI:107757]
Hmgb1	0.391761	6.15281e-172	0.928	0.795	1.16307e-167	1.7567	1.34002	high mobility group box 1 [Source:MGI Symbol;Acc:MGI:96113]
Pomp	0.308495	3.34288e-171	0.822	0.589	6.31905e-167	1.18634	0.813312	proteasome maturation protein [Source:MGI Symbol;Acc:MGI:1913787]
Ddx5	-0.357802	9.32489e-171	0.8	0.835	1.76268e-166	1.11501	1.42872	DEAD (Asp-Glu-Ala-Asp) box polypeptide 5 [Source:MGI Symbol;Acc:MGI:105037]
Mrps14	0.313283	1.66371e-170	0.672	0.395	3.14491e-166	0.827871	0.492208	mitochondrial ribosomal protein S14 [Source:MGI Symbol;Acc:MGI:1928141]
Spcs1	0.302552	2.59907e-170	0.843	0.635	4.91302e-166	1.27923	0.906393	signal peptidase complex subunit 1 homolog (S. cerevisiae) [Source:MGI Symbol;Acc:MGI:1916269]
Ndufs8	0.311349	4.48677e-170	0.667	0.392	8.48134e-166	0.816988	0.484801	NADH:ubiquinone oxidoreductase core subunit S8 [Source:MGI Symbol;Acc:MGI:2385079]
Sra1	0.284513	9.49835e-170	0.496	0.231	1.79547e-165	0.539062	0.272738	steroid receptor RNA activator 1 [Source:MGI Symbol;Acc:MGI:1344414]
Cish	0.23448	3.38594e-169	0.233	0.057	6.40044e-165	0.228621	0.0630988	cytokine inducible SH2-containing protein [Source:MGI Symbol;Acc:MGI:103159]
Uqcrc1	0.294754	4.41e-169	0.532	0.265	8.33623e-165	0.592316	0.31082	ubiquinol-cytochrome c reductase core protein 1 [Source:MGI Symbol;Acc:MGI:107876]
Ran	0.385793	5.65608e-169	0.667	0.411	1.06917e-164	0.893507	0.526822	RAN, member RAS oncogene family [Source:MGI Symbol;Acc:MGI:1333112]
Ier2	-0.609787	2.25689e-167	0.401	0.556	4.26621e-163	0.460126	0.866205	immediate early response 2 [Source:MGI Symbol;Acc:MGI:104815]
Emp2	0.344226	5.10091e-166	0.731	0.48	9.64225e-162	1.01353	0.64333	epithelial membrane protein 2 [Source:MGI Symbol;Acc:MGI:1098726]
Ndufa3	0.261996	1.45888e-165	0.936	0.821	2.75771e-161	1.69755	1.3573	NADH:ubiquinone oxidoreductase subunit A3 [Source:MGI Symbol;Acc:MGI:1913341]
Eva1b	0.261739	2.04961e-165	0.408	0.169	3.87437e-161	0.429387	0.198285	eva-1 homolog B (C. elegans) [Source:MGI Symbol;Acc:MGI:1922063]
Tspan4	0.205148	2.55069e-165	0.197	0.038	4.82156e-161	0.185298	0.0424723	tetraspanin 4 [Source:MGI Symbol;Acc:MGI:1928097]
Abca3	-0.403154	3.60977e-165	0.645	0.736	6.82355e-161	0.833935	1.19004	ATP-binding cassette, sub-family A (ABC1), member 3 [Source:MGI Symbol;Acc:MGI:1351617]
Rabac1	-0.310032	4.94557e-165	0.868	0.877	9.34861e-161	1.3098	1.58523	Rab acceptor 1 (prenylated) [Source:MGI Symbol;Acc:MGI:1201692]
Arpc3	0.311929	5.13165e-165	0.757	0.502	9.70037e-161	1.02256	0.663497	actin related protein 2/3 complex, subunit 3 [Source:MGI Symbol;Acc:MGI:1928375]
Hsd17b10	0.337573	6.37579e-165	0.77	0.545	1.20522e-160	1.1159	0.744759	hydroxysteroid (17-beta) dehydrogenase 10 [Source:MGI Symbol;Acc:MGI:1333871]
H1f0	0.402925	7.86397e-165	0.644	0.382	1.48653e-160	0.886769	0.514653	H1 histone family, member 0 [Source:MGI Symbol;Acc:MGI:95893]
Ssr4	0.302431	8.23506e-165	0.831	0.616	1.55667e-160	1.2413	0.871174	signal sequence receptor, delta [Source:MGI Symbol;Acc:MGI:1099464]
Spc24	0.340225	4.93413e-164	0.223	0.055	9.32698e-160	0.264657	0.0646069	SPC24, NDC80 kinetochore complex component, homolog (S. cerevisiae) [Source:MGI Symbol;Acc:MGI:1914879]
Polr1c	0.298939	6.58875e-164	0.581	0.313	1.24547e-159	0.671087	0.37446	polymerase (RNA) I polypeptide C [Source:MGI Symbol;Acc:MGI:103288]
Eno1	0.243677	2.61745e-163	0.331	0.118	4.94777e-159	0.335444	0.136587	enolase 1, alpha non-neuron [Source:MGI Symbol;Acc:MGI:95393]
Ndufv2	0.300985	4.86676e-163	0.653	0.382	9.19964e-159	0.79439	0.472818	NADH:ubiquinone oxidoreductase core subunit V2 [Source:MGI Symbol;Acc:MGI:1920150]
Gm42418	-0.445029	5.8436e-163	0.568	0.666	1.10462e-158	0.689561	1.0546	predicted gene, 42418 [Source:MGI Symbol;Acc:MGI:5649005]
Ctps	0.224927	7.24192e-163	0.195	0.039	1.36894e-158	0.190746	0.0422303	cytidine 5'-triphosphate synthase [Source:MGI Symbol;Acc:MGI:1858304]
Rps15	-0.183527	1.64959e-162	0.997	0.997	3.11822e-158	2.84358	3.02081	ribosomal protein S15 [Source:MGI Symbol;Acc:MGI:98117]
Psmb6	0.306498	3.39619e-162	0.783	0.544	6.41982e-158	1.09891	0.737114	proteasome (prosome, macropain) subunit, beta type 6 [Source:MGI Symbol;Acc:MGI:104880]
Nr4a1	-0.476706	1.32903e-161	0.08	0.244	2.51226e-157	0.0789234	0.334381	nuclear receptor subfamily 4, group A, member 1 [Source:MGI Symbol;Acc:MGI:1352454]
Btg2	-0.540795	1.44198e-161	0.414	0.56	2.72577e-157	0.469109	0.852813	B cell translocation gene 2, anti-proliferative [Source:MGI Symbol;Acc:MGI:108384]
Anxa3	0.365107	4.18282e-161	0.758	0.505	7.90678e-157	1.08236	0.699269	annexin A3 [Source:MGI Symbol;Acc:MGI:1201378]
Cdk1	0.321996	6.35114e-161	0.134	0.01	1.20056e-156	0.171848	0.0145447	cyclin-dependent kinase 1 [Source:MGI Symbol;Acc:MGI:88351]
Nhp2	0.271324	7.4463e-161	0.441	0.197	1.40757e-156	0.473048	0.230798	NHP2 ribonucleoprotein [Source:MGI Symbol;Acc:MGI:1098547]
P4hb	0.321921	1.61972e-160	0.716	0.457	3.06176e-156	0.941807	0.592754	prolyl 4-hydroxylase, beta polypeptide [Source:MGI Symbol;Acc:MGI:97464]
Gja1	0.311445	2.10853e-160	0.472	0.227	3.98575e-156	0.539501	0.270648	gap junction protein, alpha 1 [Source:MGI Symbol;Acc:MGI:95713]
Gkn3	0.374632	3.05792e-160	0.286	0.095	5.78038e-156	0.34963	0.120767	gastrokine 3 [Source:MGI Symbol;Acc:MGI:1916138]
Dbi	0.279419	5.02658e-160	0.983	0.95	9.50175e-156	2.46774	2.14899	diazepam binding inhibitor [Source:MGI Symbol;Acc:MGI:94865]
Psma7	0.311477	6.67517e-160	0.79	0.559	1.26181e-155	1.12834	0.764839	proteasome (prosome, macropain) subunit, alpha type 7 [Source:MGI Symbol;Acc:MGI:1347070]
Fam107b	0.182972	2.53573e-159	0.141	0.013	4.79329e-155	0.13409	0.0164149	family with sequence similarity 107, member B [Source:MGI Symbol;Acc:MGI:1913790]
Bhlhe40	0.287879	2.90171e-159	0.378	0.153	5.48511e-155	0.406604	0.180075	basic helix-loop-helix family, member e40 [Source:MGI Symbol;Acc:MGI:1097714]
Mid1ip1	-0.459025	7.51325e-159	0.629	0.714	1.42023e-154	0.836223	1.21796	Mid1 interacting protein 1 (gastrulation specific G12-like (zebrafish)) [Source:MGI Symbol;Acc:MGI:1915291]
Noxo1	0.198993	1.88055e-158	0.173	0.029	3.55481e-154	0.164319	0.0317042	NADPH oxidase organizer 1 [Source:MGI Symbol;Acc:MGI:1919143]
Tacstd2	0.258667	1.91594e-158	0.332	0.122	3.6217e-154	0.34939	0.14516	tumor-associated calcium signal transducer 2 [Source:MGI Symbol;Acc:MGI:1861606]
Mrpl11	0.216781	8.24294e-158	0.306	0.103	1.55816e-153	0.295232	0.117518	mitochondrial ribosomal protein L11 [Source:MGI Symbol;Acc:MGI:2137215]
Ptma	0.353381	1.1219e-157	0.996	0.988	2.12072e-153	2.93467	2.6139	prothymosin alpha [Source:MGI Symbol;Acc:MGI:97803]
Hmgb3	0.24926	4.52755e-157	0.357	0.138	8.55844e-153	0.365431	0.159264	high mobility group box 3 [Source:MGI Symbol;Acc:MGI:1098219]
Rras	0.239672	1.0025e-155	0.305	0.105	1.89503e-151	0.302998	0.117678	related RAS viral (r-ras) oncogene [Source:MGI Symbol;Acc:MGI:98179]
Sparc	0.297767	1.37716e-155	0.7	0.443	2.60325e-151	0.986887	0.627748	secreted acidic cysteine rich glycoprotein [Source:MGI Symbol;Acc:MGI:98373]
Azin1	0.302645	6.2301e-155	0.584	0.319	1.17768e-150	0.695692	0.396	antizyme inhibitor 1 [Source:MGI Symbol;Acc:MGI:1859169]
Ube2n	0.275801	3.00663e-154	0.572	0.303	5.68343e-150	0.651677	0.368307	ubiquitin-conjugating enzyme E2N [Source:MGI Symbol;Acc:MGI:1934835]
Tpm3	0.292156	2.25775e-153	0.642	0.374	4.26782e-149	0.784742	0.471422	tropomyosin 3, gamma [Source:MGI Symbol;Acc:MGI:1890149]
S100a14	0.287318	3.30389e-153	0.228	0.061	6.24534e-149	0.245455	0.0700913	S100 calcium binding protein A14 [Source:MGI Symbol;Acc:MGI:1913416]
Ucp2	0.276531	6.96397e-153	0.719	0.449	1.3164e-148	0.93785	0.599723	uncoupling protein 2 (mitochondrial, proton carrier) [Source:MGI Symbol;Acc:MGI:109354]
Ndufs5	0.27489	1.59512e-152	0.849	0.645	3.01526e-148	1.26935	0.918766	NADH:ubiquinone oxidoreductase core subunit S5 [Source:MGI Symbol;Acc:MGI:1890889]
Ndufa11	0.280331	4.69638e-152	0.804	0.572	8.87756e-148	1.14011	0.788553	NADH:ubiquinone oxidoreductase subunit A11 [Source:MGI Symbol;Acc:MGI:1917125]
Atp7b	-0.334303	5.52619e-152	0.068	0.222	1.04461e-147	0.0641635	0.265667	ATPase, Cu++ transporting, beta polypeptide [Source:MGI Symbol;Acc:MGI:103297]
Arpc2	0.316856	9.6896e-152	0.743	0.512	1.83162e-147	1.02494	0.677717	actin related protein 2/3 complex, subunit 2 [Source:MGI Symbol;Acc:MGI:1923959]
Apln	0.206597	1.08181e-151	0.105	0.001	2.04495e-147	0.112222	0.00100483	apelin [Source:MGI Symbol;Acc:MGI:1353624]
Elf5	0.242304	1.33597e-151	0.336	0.128	2.52538e-147	0.33829	0.143482	E74-like factor 5 [Source:MGI Symbol;Acc:MGI:1335079]
Icam1	0.330846	2.04312e-151	0.686	0.428	3.86211e-147	0.909697	0.565144	intercellular adhesion molecule 1 [Source:MGI Symbol;Acc:MGI:96392]
Actl6a	0.255972	2.7522e-151	0.406	0.175	5.20248e-147	0.419707	0.20037	actin-like 6A [Source:MGI Symbol;Acc:MGI:1861453]
Mrpl18	0.273455	8.42218e-151	0.512	0.258	1.59204e-146	0.556677	0.29858	mitochondrial ribosomal protein L18 [Source:MGI Symbol;Acc:MGI:1914931]
Sumo2	0.283095	1.19548e-150	0.863	0.673	2.25982e-146	1.36194	1.00094	small ubiquitin-like modifier 2 [Source:MGI Symbol;Acc:MGI:2158813]
Chmp4b	0.269863	2.98724e-150	0.614	0.342	5.64679e-146	0.717103	0.424454	charged multivesicular body protein 4B [Source:MGI Symbol;Acc:MGI:1922858]
Cnih4	0.255874	4.16033e-150	0.403	0.175	7.86427e-146	0.419222	0.199663	cornichon family AMPA receptor auxiliary protein 4 [Source:MGI Symbol;Acc:MGI:1925828]
Haus7	0.22174	5.48093e-150	0.249	0.074	1.03606e-145	0.243136	0.081274	HAUS augmin-like complex, subunit 7 [Source:MGI Symbol;Acc:MGI:1920988]
Plb1	0.240099	7.17462e-150	0.179	0.035	1.35622e-145	0.186354	0.0394045	phospholipase B1 [Source:MGI Symbol;Acc:MGI:1922406]
Ppa1	0.226132	8.81721e-150	0.245	0.073	1.66672e-145	0.239875	0.0783718	pyrophosphatase (inorganic) 1 [Source:MGI Symbol;Acc:MGI:97831]
Rab3c	0.192659	4.46427e-149	0.169	0.03	8.4388e-145	0.161536	0.0329413	RAB3C, member RAS oncogene family [Source:MGI Symbol;Acc:MGI:1914545]
Psmb7	0.284766	3.94265e-148	0.563	0.307	7.45279e-144	0.65072	0.369703	proteasome (prosome, macropain) subunit, beta type 7 [Source:MGI Symbol;Acc:MGI:107637]
Psmb4	0.301021	5.29147e-148	0.703	0.456	1.00025e-143	0.909025	0.581946	proteasome (prosome, macropain) subunit, beta type 4 [Source:MGI Symbol;Acc:MGI:1098257]
Ift20	0.305796	5.87497e-148	0.843	0.656	1.11055e-143	1.34633	0.981362	intraflagellar transport 20 [Source:MGI Symbol;Acc:MGI:1915585]
Sp3os	0.266049	6.42837e-148	0.472	0.228	1.21516e-143	0.519217	0.272669	trans-acting transcription factor 3, opposite strand [Source:MGI Symbol;Acc:MGI:1914936]
Gm20186	0.225947	6.94469e-148	0.166	0.029	1.31275e-143	0.172956	0.0341462	predicted gene, 20186 [Source:MGI Symbol;Acc:MGI:5012371]
Coa3	0.286878	9.87016e-148	0.732	0.483	1.86576e-143	0.950723	0.622606	cytochrome C oxidase assembly factor 3 [Source:MGI Symbol;Acc:MGI:1098757]
Atp6v1g3	0.197646	1.67931e-147	0.166	0.029	3.1744e-143	0.160532	0.0317276	ATPase, H+ transporting, lysosomal V1 subunit G3 [Source:MGI Symbol;Acc:MGI:2450548]
Pcbd1	0.27408	1.15736e-146	0.515	0.267	2.18776e-142	0.581597	0.319036	pterin 4 alpha carbinolamine dehydratase/dimerization cofactor of hepatocyte nuclear factor 1 alpha (TCF1) 1 [Source:MGI Symbol;Acc:MGI:94873]
Egfl7	0.197038	2.4423e-146	0.231	0.064	4.61669e-142	0.22046	0.0708027	EGF-like domain 7 [Source:MGI Symbol;Acc:MGI:2449923]
Spc25	0.194364	2.75367e-146	0.116	0.007	5.20525e-142	0.119325	0.00757949	SPC25, NDC80 kinetochore complex component, homolog (S. cerevisiae) [Source:MGI Symbol;Acc:MGI:1913692]
Gng12	0.256818	1.21672e-145	0.422	0.19	2.29997e-141	0.44374	0.219906	guanine nucleotide binding protein (G protein), gamma 12 [Source:MGI Symbol;Acc:MGI:1336171]
Anxa5	0.325933	1.90909e-145	0.728	0.488	3.60875e-141	1.05117	0.687384	annexin A5 [Source:MGI Symbol;Acc:MGI:106008]
Mgst3	0.252886	3.18864e-145	0.545	0.288	6.02749e-141	0.631336	0.362133	microsomal glutathione S-transferase 3 [Source:MGI Symbol;Acc:MGI:1913697]
H1fx	0.212112	1.38601e-144	0.143	0.019	2.61998e-140	0.15211	0.0239162	H1 histone family, member X [Source:MGI Symbol;Acc:MGI:2685307]
Hcfc1r1	0.282057	2.22887e-144	0.726	0.472	4.21324e-140	0.95104	0.621028	host cell factor C1 regulator 1 (XPO1-dependent) [Source:MGI Symbol;Acc:MGI:2663619]
Cyp2b10	-0.46266	4.93429e-144	0.152	0.321	9.3273e-140	0.160506	0.442683	cytochrome P450, family 2, subfamily b, polypeptide 10 [Source:MGI Symbol;Acc:MGI:88598]
Eif1ax	0.250311	2.32721e-143	0.436	0.201	4.39913e-139	0.463257	0.236773	eukaryotic translation initiation factor 1A, X-linked [Source:MGI Symbol;Acc:MGI:1913485]
Utp11l	0.226219	5.21527e-143	0.332	0.129	9.85843e-139	0.331525	0.146216	NA
Hspb6	0.192286	8.59493e-142	0.175	0.036	1.6247e-137	0.169322	0.0398607	heat shock protein, alpha-crystallin-related, B6 [Source:MGI Symbol;Acc:MGI:2685325]
Uqcrfs1	0.270034	9.52478e-142	0.625	0.365	1.80047e-137	0.73528	0.445156	ubiquinol-cytochrome c reductase, Rieske iron-sulfur polypeptide 1 [Source:MGI Symbol;Acc:MGI:1913944]
Nme2	0.251827	4.01576e-141	0.465	0.226	7.591e-137	0.497573	0.263335	NME/NM23 nucleoside diphosphate kinase 2 [Source:MGI Symbol;Acc:MGI:97356]
Hadh	0.258867	6.34476e-141	0.541	0.288	1.19935e-136	0.61564	0.352208	hydroxyacyl-Coenzyme A dehydrogenase [Source:MGI Symbol;Acc:MGI:96009]
Tusc3	0.2227	8.43332e-141	0.448	0.21	1.59415e-136	0.473916	0.251885	tumor suppressor candidate 3 [Source:MGI Symbol;Acc:MGI:1933134]
Retnlg	0.257917	1.35846e-140	0.106	0.004	2.5679e-136	0.119322	0.00454015	resistin like gamma [Source:MGI Symbol;Acc:MGI:2667763]
Junb	-0.598769	1.92077e-140	0.449	0.583	3.63084e-136	0.550484	0.946521	jun B proto-oncogene [Source:MGI Symbol;Acc:MGI:96647]
H2-T22	0.206659	3.66156e-140	0.24	0.072	6.92144e-136	0.233496	0.0821259	histocompatibility 2, T region locus 22 [Source:MGI Symbol;Acc:MGI:95956]
Gadd45g	0.293486	3.74018e-140	0.619	0.366	7.07007e-136	0.863448	0.531205	growth arrest and DNA-damage-inducible 45 gamma [Source:MGI Symbol;Acc:MGI:1346325]
Atp11a	0.293444	4.48914e-140	0.746	0.495	8.48582e-136	0.999832	0.662754	ATPase, class VI, type 11A [Source:MGI Symbol;Acc:MGI:1354735]
Ndufs3	0.270904	9.24634e-140	0.608	0.352	1.74784e-135	0.715389	0.430867	NADH:ubiquinone oxidoreductase core subunit S3 [Source:MGI Symbol;Acc:MGI:1915599]
1110065P20Rik	0.244529	8.1582e-139	0.442	0.21	1.54214e-134	0.469522	0.245443	RIKEN cDNA 1110065P20 gene [Source:MGI Symbol;Acc:MGI:1916170]
Arg2	0.24836	8.4094e-139	0.352	0.148	1.58963e-134	0.36537	0.166457	arginase type II [Source:MGI Symbol;Acc:MGI:1330806]
Timm17a	0.232474	1.76727e-138	0.466	0.226	3.34067e-134	0.487224	0.261923	translocase of inner mitochondrial membrane 17a [Source:MGI Symbol;Acc:MGI:1343131]
Rbx1	0.243598	2.27877e-138	0.906	0.749	4.30755e-134	1.49412	1.16102	ring-box 1 [Source:MGI Symbol;Acc:MGI:1891829]
Fgfbp1	-0.298164	3.12142e-138	0.043	0.174	5.90042e-134	0.0397431	0.209585	fibroblast growth factor binding protein 1 [Source:MGI Symbol;Acc:MGI:1096350]
Vimp	-0.373014	7.62161e-138	0.638	0.711	1.44071e-133	0.791078	1.10095	NA
Cisd1	0.255215	8.44587e-138	0.618	0.353	1.59652e-133	0.722621	0.438995	CDGSH iron sulfur domain 1 [Source:MGI Symbol;Acc:MGI:1261855]
Slco4c1	0.279707	2.37764e-137	0.482	0.247	4.49446e-133	0.546679	0.295996	solute carrier organic anion transporter family, member 4C1 [Source:MGI Symbol;Acc:MGI:2442784]
Krt19	0.349465	3.34422e-137	0.41	0.193	6.32158e-133	0.500307	0.249903	keratin 19 [Source:MGI Symbol;Acc:MGI:96693]
Dnajc15	0.222347	3.69858e-137	0.545	0.288	6.99143e-133	0.614193	0.361262	DnaJ heat shock protein family (Hsp40) member C15 [Source:MGI Symbol;Acc:MGI:1913398]
Psma2	0.280774	4.07994e-137	0.757	0.528	7.71231e-133	1.03896	0.70944	proteasome (prosome, macropain) subunit, alpha type 2 [Source:MGI Symbol;Acc:MGI:104885]
Samhd1	0.224727	6.92373e-137	0.234	0.071	1.30879e-132	0.235924	0.0800995	SAM domain and HD domain, 1 [Source:MGI Symbol;Acc:MGI:1927468]
Cdc20	0.324286	7.2343e-137	0.136	0.018	1.3675e-132	0.174492	0.0237875	cell division cycle 20 [Source:MGI Symbol;Acc:MGI:1859866]
Hn1	0.343554	1.39708e-136	0.356	0.158	2.64091e-132	0.421562	0.186465	NA
Cenpa	0.296536	1.71651e-136	0.123	0.013	3.24471e-132	0.161816	0.0180268	centromere protein A [Source:MGI Symbol;Acc:MGI:88375]
Ndufb11	0.23373	5.59578e-136	0.931	0.838	1.05777e-131	1.72349	1.42461	NADH:ubiquinone oxidoreductase subunit B11 [Source:MGI Symbol;Acc:MGI:1349919]
Tmem167	0.260008	7.28341e-136	0.56	0.308	1.37678e-131	0.636382	0.371942	transmembrane protein 167 [Source:MGI Symbol;Acc:MGI:1913324]
Tspan14	0.194289	9.20225e-136	0.214	0.059	1.7395e-131	0.203895	0.0655112	tetraspanin 14 [Source:MGI Symbol;Acc:MGI:1196325]
Atp8a1	-0.381769	1.01318e-135	0.618	0.688	1.91522e-131	0.748331	1.05914	ATPase, aminophospholipid transporter (APLT), class I, type 8A, member 1 [Source:MGI Symbol;Acc:MGI:1330848]
Tk1	0.19611	1.54349e-135	0.114	0.009	2.91766e-131	0.120852	0.00981193	thymidine kinase 1 [Source:MGI Symbol;Acc:MGI:98763]
Ubl4a	0.234775	2.59079e-135	0.362	0.154	4.89736e-131	0.373915	0.177809	ubiquitin-like 4A [Source:MGI Symbol;Acc:MGI:95049]
Hk2	-0.426074	3.07274e-135	0.194	0.355	5.80841e-131	0.193608	0.467166	hexokinase 2 [Source:MGI Symbol;Acc:MGI:1315197]
Dhrs4	0.21184	3.50377e-135	0.312	0.119	6.62317e-131	0.303505	0.132295	dehydrogenase/reductase (SDR family) member 4 [Source:MGI Symbol;Acc:MGI:90169]
Slc25a3	0.258552	5.26069e-135	0.87	0.711	9.94429e-131	1.38683	1.06252	solute carrier family 25 (mitochondrial carrier, phosphate carrier), member 3 [Source:MGI Symbol;Acc:MGI:1353498]
Mrps7	0.227149	8.98213e-135	0.363	0.154	1.69789e-130	0.364021	0.173198	mitchondrial ribosomal protein S7 [Source:MGI Symbol;Acc:MGI:1354367]
Hint3	0.234181	1.10393e-134	0.412	0.189	2.08676e-130	0.42556	0.217122	histidine triad nucleotide binding protein 3 [Source:MGI Symbol;Acc:MGI:1914097]
Mrpl20	0.257603	2.36071e-134	0.634	0.371	4.46245e-130	0.73962	0.45684	mitochondrial ribosomal protein L20 [Source:MGI Symbol;Acc:MGI:2137221]
Snrpc	0.231819	4.22328e-134	0.425	0.199	7.98327e-130	0.447583	0.233641	U1 small nuclear ribonucleoprotein C [Source:MGI Symbol;Acc:MGI:109489]
S100g	-0.304014	7.86179e-134	0.972	0.967	1.48611e-129	2.73041	3.07419	S100 calcium binding protein G [Source:MGI Symbol;Acc:MGI:104528]
Tmprss4	0.233918	8.35717e-134	0.41	0.188	1.57976e-129	0.42568	0.217779	transmembrane protease, serine 4 [Source:MGI Symbol;Acc:MGI:2384877]
Tnip3	0.3048	8.85357e-134	0.113	0.009	1.67359e-129	0.147511	0.0110076	TNFAIP3 interacting protein 3 [Source:MGI Symbol;Acc:MGI:3041165]
Dtymk	0.261844	1.86696e-133	0.374	0.168	3.52912e-129	0.398191	0.189486	deoxythymidylate kinase [Source:MGI Symbol;Acc:MGI:108396]
Rpsa	0.243285	1.97803e-133	0.977	0.94	3.73907e-129	2.26748	1.99564	ribosomal protein SA [Source:MGI Symbol;Acc:MGI:105381]
Eif2s2	0.293081	2.73592e-133	0.749	0.501	5.1717e-129	1.00871	0.674823	eukaryotic translation initiation factor 2, subunit 2 (beta) [Source:MGI Symbol;Acc:MGI:1914454]
Mdh1	0.267554	3.0979e-133	0.67	0.424	5.85596e-129	0.840687	0.540093	malate dehydrogenase 1, NAD (soluble) [Source:MGI Symbol;Acc:MGI:97051]
Rab27b	0.249499	3.64126e-133	0.513	0.271	6.88307e-129	0.570569	0.324516	RAB27B, member RAS oncogene family [Source:MGI Symbol;Acc:MGI:1931295]
Ccdc167	0.198666	2.3244e-132	0.235	0.073	4.39382e-128	0.225768	0.0800023	coiled-coil domain containing 167 [Source:MGI Symbol;Acc:MGI:1915847]
Eif4e2	0.222757	5.97676e-132	0.364	0.156	1.12979e-127	0.364986	0.176371	eukaryotic translation initiation factor 4E member 2 [Source:MGI Symbol;Acc:MGI:1914440]
Adam10	0.213486	3.75903e-131	0.266	0.093	7.1057e-127	0.263753	0.10458	a disintegrin and metallopeptidase domain 10 [Source:MGI Symbol;Acc:MGI:109548]
Cox20	0.254518	4.26623e-131	0.551	0.302	8.06445e-127	0.625565	0.367225	cytochrome c oxidase assembly protein 20 [Source:MGI Symbol;Acc:MGI:1913609]
Sdhc	0.247364	6.29652e-131	0.543	0.298	1.19023e-126	0.598912	0.349542	succinate dehydrogenase complex, subunit C, integral membrane protein [Source:MGI Symbol;Acc:MGI:1913302]
Cldn4	0.19066	7.43562e-131	0.146	0.025	1.40556e-126	0.175351	0.0436222	claudin 4 [Source:MGI Symbol;Acc:MGI:1313314]
Acot1	-0.414854	5.42013e-130	0.257	0.409	1.02457e-125	0.254375	0.532871	acyl-CoA thioesterase 1 [Source:MGI Symbol;Acc:MGI:1349396]
Mad2l1	0.190328	5.10641e-129	0.138	0.022	9.65265e-125	0.140165	0.0243147	MAD2 mitotic arrest deficient-like 1 [Source:MGI Symbol;Acc:MGI:1860374]
Abhd11	0.217548	1.28382e-128	0.402	0.184	2.4268e-124	0.407493	0.210929	abhydrolase domain containing 11 [Source:MGI Symbol;Acc:MGI:1916008]
Commd3	0.222664	3.72876e-128	0.435	0.21	7.04848e-124	0.453468	0.244075	COMM domain containing 3 [Source:MGI Symbol;Acc:MGI:88218]
Pfn1	0.293003	5.07468e-128	0.709	0.477	9.59268e-124	0.942301	0.625256	profilin 1 [Source:MGI Symbol;Acc:MGI:97549]
Vdac2	0.246272	4.13868e-127	0.575	0.327	7.82334e-123	0.654661	0.395391	voltage-dependent anion channel 2 [Source:MGI Symbol;Acc:MGI:106915]
Ssr2	0.282958	1.25331e-126	0.744	0.522	2.36914e-122	1.01468	0.696627	signal sequence receptor, beta [Source:MGI Symbol;Acc:MGI:1913506]
Tyms	0.222843	2.33701e-126	0.198	0.056	4.41766e-122	0.203984	0.06092	thymidylate synthase [Source:MGI Symbol;Acc:MGI:98878]
Ppdpf	0.269811	2.51801e-126	0.747	0.514	4.75979e-122	0.998721	0.683844	pancreatic progenitor cell differentiation and proliferation factor [Source:MGI Symbol;Acc:MGI:1913746]
Rpl36a	-0.190146	3.54483e-126	0.985	0.982	6.70079e-122	2.31247	2.49472	ribosomal protein L36A [Source:MGI Symbol;Acc:MGI:1201789]
Nr1d1	-0.358461	6.17246e-126	0.108	0.254	1.16678e-121	0.100147	0.315895	nuclear receptor subfamily 1, group D, member 1 [Source:MGI Symbol;Acc:MGI:2444210]
Dctn3	0.253238	7.38462e-126	0.667	0.417	1.39591e-121	0.806645	0.520831	dynactin 3 [Source:MGI Symbol;Acc:MGI:1859251]
Glrx	0.264693	7.91954e-126	0.585	0.341	1.49703e-121	0.696497	0.424763	glutaredoxin [Source:MGI Symbol;Acc:MGI:2135625]
Pfdn5	-0.220777	8.99108e-126	0.955	0.961	1.69958e-121	1.87266	2.08154	prefoldin 5 [Source:MGI Symbol;Acc:MGI:1928753]
Cdc42	0.265069	9.21116e-126	0.761	0.528	1.74118e-121	1.03117	0.712615	cell division cycle 42 [Source:MGI Symbol;Acc:MGI:106211]
Rpl5	-0.261396	1.265e-125	0.886	0.89	2.39122e-121	1.44434	1.68102	ribosomal protein L5 [Source:MGI Symbol;Acc:MGI:102854]
Tspan1	0.217286	2.8358e-125	0.419	0.204	5.36051e-121	0.47165	0.257835	tetraspanin 1 [Source:MGI Symbol;Acc:MGI:1914055]
Pgm2	0.213237	1.04632e-124	0.321	0.131	1.97786e-120	0.319623	0.148487	phosphoglucomutase 2 [Source:MGI Symbol;Acc:MGI:97564]
Psma1	0.251072	2.05472e-124	0.536	0.3	3.88404e-120	0.609105	0.359758	proteasome (prosome, macropain) subunit, alpha type 1 [Source:MGI Symbol;Acc:MGI:1347005]
Cldn7	0.257342	2.22312e-124	0.705	0.463	4.20236e-120	0.933098	0.623621	claudin 7 [Source:MGI Symbol;Acc:MGI:1859285]
Use1	-0.350373	3.18494e-124	0.617	0.675	6.02049e-120	0.724682	1.00384	unconventional SNARE in the ER 1 homolog (S. cerevisiae) [Source:MGI Symbol;Acc:MGI:1914273]
Psmb5	0.264659	3.50702e-124	0.676	0.432	6.62932e-120	0.84411	0.549698	proteasome (prosome, macropain) subunit, beta type 5 [Source:MGI Symbol;Acc:MGI:1194513]
Psmb3	0.274213	5.97068e-124	0.773	0.555	1.12864e-119	1.06848	0.75045	proteasome (prosome, macropain) subunit, beta type 3 [Source:MGI Symbol;Acc:MGI:1347014]
Cdkn3	0.213087	8.53609e-124	0.104	0.008	1.61358e-119	0.120935	0.00918065	cyclin-dependent kinase inhibitor 3 [Source:MGI Symbol;Acc:MGI:1919641]
Cox6b2	0.283292	1.44471e-123	0.393	0.189	2.73093e-119	0.456989	0.233565	cytochrome c oxidase subunit 6B2 [Source:MGI Symbol;Acc:MGI:3044182]
Chchd1	0.25576	2.50162e-123	0.619	0.37	4.72882e-119	0.724982	0.452697	coiled-coil-helix-coiled-coil-helix domain containing 1 [Source:MGI Symbol;Acc:MGI:1913371]
Cd81	0.26405	3.72403e-123	0.817	0.624	7.03953e-119	1.2462	0.913297	CD81 antigen [Source:MGI Symbol;Acc:MGI:1096398]
Ap1s1	0.209403	5.80995e-123	0.349	0.152	1.09825e-118	0.349123	0.171748	adaptor protein complex AP-1, sigma 1 [Source:MGI Symbol;Acc:MGI:1098244]
Camk2n1	-0.403234	1.0199e-122	0.296	0.437	1.92792e-118	0.297551	0.573855	calcium/calmodulin-dependent protein kinase II inhibitor 1 [Source:MGI Symbol;Acc:MGI:1913509]
Rpl30	-0.196526	1.28113e-122	0.977	0.979	2.42172e-118	2.16948	2.36044	ribosomal protein L30 [Source:MGI Symbol;Acc:MGI:98037]
Hist1h2ap	0.391494	1.68221e-122	0.103	0.008	3.17988e-118	0.154793	0.0112212	histone cluster 1, H2ap [Source:MGI Symbol;Acc:MGI:3710573]
Ccnb2	0.208629	1.86384e-122	0.108	0.01	3.52321e-118	0.123157	0.0116709	cyclin B2 [Source:MGI Symbol;Acc:MGI:88311]
Bud31	0.234239	3.59543e-122	0.469	0.243	6.79644e-118	0.500126	0.280621	BUD31 homolog [Source:MGI Symbol;Acc:MGI:2141291]
Psmd14	0.189699	1.12403e-121	0.282	0.108	2.12476e-117	0.269835	0.117969	proteasome (prosome, macropain) 26S subunit, non-ATPase, 14 [Source:MGI Symbol;Acc:MGI:1913284]
Commd2	0.228859	4.28567e-121	0.431	0.213	8.1012e-117	0.451991	0.245471	COMM domain containing 2 [Source:MGI Symbol;Acc:MGI:1098806]
Psma6	0.244782	5.26677e-121	0.553	0.313	9.95577e-117	0.624252	0.375603	proteasome (prosome, macropain) subunit, alpha type 6 [Source:MGI Symbol;Acc:MGI:1347006]
Mrpl46	0.19205	8.86924e-121	0.282	0.108	1.67655e-116	0.268132	0.116817	mitochondrial ribosomal protein L46 [Source:MGI Symbol;Acc:MGI:1914558]
Pf4	0.218928	2.69272e-120	0.22	0.071	5.09006e-116	0.228248	0.0811036	platelet factor 4 [Source:MGI Symbol;Acc:MGI:1888711]
Park7	0.238592	2.70076e-120	0.811	0.595	5.10525e-116	1.13984	0.826044	Parkinson disease (autosomal recessive, early onset) 7 [Source:MGI Symbol;Acc:MGI:2135637]
Mal	0.242039	2.71503e-120	0.493	0.262	5.13222e-116	0.539738	0.30961	myelin and lymphocyte protein, T cell differentiation protein [Source:MGI Symbol;Acc:MGI:892970]
Nkd1	0.260182	3.64512e-120	0.623	0.384	6.89037e-116	0.775945	0.494484	naked cuticle 1 [Source:MGI Symbol;Acc:MGI:2135954]
Tbrg1	0.219281	4.00577e-120	0.39	0.182	7.57212e-116	0.406565	0.21371	transforming growth factor beta regulated gene 1 [Source:MGI Symbol;Acc:MGI:1100877]
Gng5	0.209036	4.20515e-120	0.975	0.917	7.94899e-116	2.06456	1.78248	guanine nucleotide binding protein (G protein), gamma 5 [Source:MGI Symbol;Acc:MGI:109164]
Epas1	-0.376017	6.36189e-120	0.265	0.41	1.20259e-115	0.2652	0.527825	endothelial PAS domain protein 1 [Source:MGI Symbol;Acc:MGI:109169]
Erh	0.263697	7.13613e-120	0.704	0.466	1.34894e-115	0.911695	0.609937	ERH mRNA splicing and mitosis factor [Source:MGI Symbol;Acc:MGI:108089]
Pdap1	0.255216	2.78816e-119	0.566	0.33	5.27046e-115	0.664128	0.406027	PDGFA associated protein 1 [Source:MGI Symbol;Acc:MGI:2448536]
Srsf5	-0.341689	4.89827e-119	0.557	0.637	9.25919e-115	0.632103	0.905466	serine/arginine-rich splicing factor 5 [Source:MGI Symbol;Acc:MGI:98287]
Areg	0.393622	9.15809e-119	0.404	0.206	1.73115e-114	0.592848	0.310875	amphiregulin [Source:MGI Symbol;Acc:MGI:88068]
Calr	0.312409	5.02024e-118	0.711	0.499	9.48977e-114	1.01217	0.687912	calreticulin [Source:MGI Symbol;Acc:MGI:88252]
Aqp5	-0.341669	1.3981e-117	0.666	0.731	2.64282e-113	0.916701	1.22647	aquaporin 5 [Source:MGI Symbol;Acc:MGI:106215]
Mpc1	0.189001	2.60064e-117	0.815	0.604	4.91599e-113	1.18652	0.879449	mitochondrial pyruvate carrier 1 [Source:MGI Symbol;Acc:MGI:1915240]
Eny2	0.245902	1.00769e-116	0.648	0.405	1.90483e-112	0.785237	0.510247	ENY2 transcription and export complex 2 subunit [Source:MGI Symbol;Acc:MGI:1919286]
1810037I17Rik	0.201579	2.6409e-116	0.846	0.664	4.99209e-112	1.31187	1.00019	RIKEN cDNA 1810037I17 gene [Source:MGI Symbol;Acc:MGI:1914954]
Cenpf	0.21455	2.90227e-116	0.107	0.011	5.48616e-112	0.126936	0.0151908	centromere protein F [Source:MGI Symbol;Acc:MGI:1313302]
Mydgf	0.23855	3.52375e-116	0.556	0.321	6.66094e-112	0.636029	0.390016	myeloid derived growth factor [Source:MGI Symbol;Acc:MGI:2156020]
Ranbp1	0.285038	4.98197e-116	0.558	0.334	9.41742e-112	0.68171	0.415185	RAN binding protein 1 [Source:MGI Symbol;Acc:MGI:96269]
Mrpl54	0.241617	6.64335e-116	0.67	0.424	1.25579e-111	0.814225	0.536603	mitochondrial ribosomal protein L54 [Source:MGI Symbol;Acc:MGI:1913297]
Psma5	0.218356	7.83201e-116	0.455	0.233	1.48049e-111	0.479272	0.271609	proteasome (prosome, macropain) subunit, alpha type 5 [Source:MGI Symbol;Acc:MGI:1347009]
Cd36	-0.278424	1.00922e-115	0.878	0.882	1.90772e-111	1.54932	1.79806	CD36 molecule [Source:MGI Symbol;Acc:MGI:107899]
Ppp1r14b	0.186216	1.16511e-115	0.264	0.099	2.2024e-111	0.256791	0.111438	protein phosphatase 1, regulatory inhibitor subunit 14B [Source:MGI Symbol;Acc:MGI:107682]
Cfl2	0.207812	1.5448e-115	0.431	0.215	2.92013e-111	0.459293	0.258161	cofilin 2, muscle [Source:MGI Symbol;Acc:MGI:101763]
Tcn2	0.213291	2.35779e-115	0.374	0.175	4.45693e-111	0.381095	0.198418	transcobalamin 2 [Source:MGI Symbol;Acc:MGI:98534]
Atp5a1	0.246087	5.17877e-115	0.802	0.603	9.78943e-111	1.1406	0.835052	ATP synthase, H+ transporting, mitochondrial F1 complex, alpha subunit 1 [Source:MGI Symbol;Acc:MGI:88115]
Dram2	0.229038	1.73113e-114	0.513	0.281	3.27235e-110	0.564402	0.336147	DNA-damage regulated autophagy modulator 2 [Source:MGI Symbol;Acc:MGI:1914421]
Clic3	0.317193	3.1343e-114	0.72	0.506	5.92477e-110	1.04141	0.713158	chloride intracellular channel 3 [Source:MGI Symbol;Acc:MGI:1916704]
Chmp2a	0.242626	3.19815e-114	0.746	0.509	6.04547e-110	0.975617	0.676383	charged multivesicular body protein 2A [Source:MGI Symbol;Acc:MGI:1916203]
Ndufa10	0.214051	8.7169e-114	0.488	0.259	1.64776e-109	0.519128	0.304609	NADH:ubiquinone oxidoreductase subunit A10 [Source:MGI Symbol;Acc:MGI:1914523]
AW112010	0.425497	1.67361e-113	0.198	0.061	3.16362e-109	0.276181	0.0921669	expressed sequence AW112010 [Source:MGI Symbol;Acc:MGI:2147706]
Fasn	-0.367997	2.95799e-113	0.662	0.709	5.59148e-109	0.863991	1.15928	fatty acid synthase [Source:MGI Symbol;Acc:MGI:95485]
Nsa2	0.228557	6.43231e-113	0.556	0.318	1.2159e-108	0.628454	0.388049	NSA2 ribosome biogenesis homolog [Source:MGI Symbol;Acc:MGI:1913883]
Gadd45gip1	0.204126	2.13328e-112	0.441	0.225	4.03254e-108	0.45727	0.260475	growth arrest and DNA-damage-inducible, gamma interacting protein 1 [Source:MGI Symbol;Acc:MGI:1914947]
Phlda1	0.334768	2.35895e-112	0.725	0.511	4.45912e-108	1.15831	0.799174	pleckstrin homology like domain, family A, member 1 [Source:MGI Symbol;Acc:MGI:1096880]
Ndufa9	0.196839	9.94941e-112	0.375	0.177	1.88074e-107	0.375151	0.199817	NADH:ubiquinone oxidoreductase subunit A9 [Source:MGI Symbol;Acc:MGI:1913358]
Dstn	0.228857	1.11527e-111	0.957	0.887	2.10819e-107	1.98205	1.68814	destrin [Source:MGI Symbol;Acc:MGI:1929270]
Uqcc2	0.237846	2.97844e-111	0.756	0.529	5.63015e-107	0.992117	0.699644	ubiquinol-cytochrome c reductase complex assembly factor 2 [Source:MGI Symbol;Acc:MGI:1914517]
Cd83	0.198351	5.00635e-111	0.129	0.024	9.46351e-107	0.137333	0.026192	CD83 antigen [Source:MGI Symbol;Acc:MGI:1328316]
Capzb	0.233215	5.70988e-111	0.539	0.308	1.07934e-106	0.611949	0.374662	capping protein (actin filament) muscle Z-line, beta [Source:MGI Symbol;Acc:MGI:104652]
Dctpp1	0.215921	6.14185e-111	0.293	0.123	1.16099e-106	0.296171	0.135547	dCTP pyrophosphatase 1 [Source:MGI Symbol;Acc:MGI:1913672]
Ndufv3	0.237128	8.49034e-111	0.802	0.591	1.60493e-106	1.12568	0.821535	NADH:ubiquinone oxidoreductase core subunit V3 [Source:MGI Symbol;Acc:MGI:1890894]
Top2a	0.210574	1.26225e-110	0.102	0.011	2.38603e-106	0.124329	0.0151867	topoisomerase (DNA) II alpha [Source:MGI Symbol;Acc:MGI:98790]
Pdzk1ip1	0.249838	2.30997e-110	0.625	0.392	4.36654e-106	0.770726	0.501763	PDZK1 interacting protein 1 [Source:MGI Symbol;Acc:MGI:1914432]
Cxcl15	0.228408	9.17261e-110	0.998	0.986	1.7339e-105	4.15328	3.88833	chemokine (C-X-C motif) ligand 15 [Source:MGI Symbol;Acc:MGI:1339941]
Hnrnpa1	0.264009	1.00296e-109	0.684	0.457	1.89589e-105	0.879005	0.592381	heterogeneous nuclear ribonucleoprotein A1 [Source:MGI Symbol;Acc:MGI:104820]
Bola3	0.216098	2.79137e-109	0.589	0.351	5.27653e-105	0.690569	0.442958	bolA-like 3 (E. coli) [Source:MGI Symbol;Acc:MGI:1925903]
Uqcrc2	0.204996	3.3661e-109	0.422	0.214	6.36293e-105	0.437671	0.246492	ubiquinol cytochrome c reductase core protein 2 [Source:MGI Symbol;Acc:MGI:1914253]
Atp6v1g1	0.198773	6.62277e-109	0.968	0.9	1.2519e-104	1.98848	1.71654	ATPase, H+ transporting, lysosomal V1 subunit G1 [Source:MGI Symbol;Acc:MGI:1913540]
Pdia3	0.244941	1.20694e-108	0.661	0.434	2.28149e-104	0.834031	0.559529	protein disulfide isomerase associated 3 [Source:MGI Symbol;Acc:MGI:95834]
Lsm2	0.226714	2.38786e-108	0.308	0.138	4.51378e-104	0.325095	0.154381	LSM2 homolog, U6 small nuclear RNA and mRNA degradation associated [Source:MGI Symbol;Acc:MGI:90676]
Tubb5	0.561245	1.87657e-107	0.462	0.271	3.54728e-103	0.654612	0.339402	tubulin, beta 5 class I [Source:MGI Symbol;Acc:MGI:107812]
Lgals9	0.200717	4.37645e-107	0.331	0.15	8.27281e-103	0.335071	0.169881	lectin, galactose binding, soluble 9 [Source:MGI Symbol;Acc:MGI:109496]
Glrx3	0.183455	1.842e-106	0.353	0.164	3.48193e-102	0.349592	0.185976	glutaredoxin 3 [Source:MGI Symbol;Acc:MGI:1353653]
Efhd2	0.205652	2.20327e-106	0.382	0.186	4.16485e-102	0.394989	0.215402	EF hand domain containing 2 [Source:MGI Symbol;Acc:MGI:106504]
Aldh1a7	0.194975	2.40697e-106	0.377	0.183	4.5499e-102	0.384799	0.209929	aldehyde dehydrogenase family 1, subfamily A7 [Source:MGI Symbol;Acc:MGI:1347050]
Btf3	0.214432	3.43191e-106	0.939	0.859	6.48735e-102	1.7816	1.50957	basic transcription factor 3 [Source:MGI Symbol;Acc:MGI:1202875]
Mrpl34	0.207795	6.72794e-106	0.548	0.311	1.27178e-101	0.603301	0.377334	mitochondrial ribosomal protein L34 [Source:MGI Symbol;Acc:MGI:2137227]
Mrps36	0.230547	7.63418e-106	0.614	0.377	1.44309e-101	0.717651	0.466083	mitochondrial ribosomal protein S36 [Source:MGI Symbol;Acc:MGI:1913378]
Sprr1a	0.501044	9.9018e-106	0.101	0.012	1.87174e-101	0.150834	0.020207	small proline-rich protein 1A [Source:MGI Symbol;Acc:MGI:106660]
Tmem256	0.214754	1.24e-105	0.896	0.753	2.34398e-101	1.48107	1.18496	transmembrane protein 256 [Source:MGI Symbol;Acc:MGI:1916436]
Slc25a39	0.190621	7.09091e-105	0.402	0.199	1.34039e-100	0.408729	0.230478	solute carrier family 25, member 39 [Source:MGI Symbol;Acc:MGI:1196386]
Foxp1	-0.373791	7.12441e-105	0.419	0.512	1.34673e-100	0.436263	0.702553	forkhead box P1 [Source:MGI Symbol;Acc:MGI:1914004]
Syngr2	0.203733	7.77514e-105	0.379	0.186	1.46973e-100	0.391491	0.213797	synaptogyrin 2 [Source:MGI Symbol;Acc:MGI:1328324]
Igfbp7	0.207201	9.36022e-105	0.814	0.634	1.76936e-100	1.30692	0.98985	insulin-like growth factor binding protein 7 [Source:MGI Symbol;Acc:MGI:1352480]
Ddost	0.221033	1.91873e-104	0.531	0.307	3.62697e-100	0.596207	0.370058	dolichyl-di-phosphooligosaccharide-protein glycotransferase [Source:MGI Symbol;Acc:MGI:1194508]
Sdhd	0.197428	2.95703e-104	0.422	0.217	5.58967e-100	0.43941	0.251777	succinate dehydrogenase complex, subunit D, integral membrane protein [Source:MGI Symbol;Acc:MGI:1914175]
Bola2	0.191573	1.16675e-103	0.493	0.27	2.2055e-99	0.535373	0.329392	bolA-like 2 (E. coli) [Source:MGI Symbol;Acc:MGI:1913412]
Klf6	-0.546376	3.52452e-103	0.29	0.423	6.6624e-99	0.324881	0.634275	Kruppel-like factor 6 [Source:MGI Symbol;Acc:MGI:1346318]
Anxa4	0.22349	3.76012e-103	0.653	0.415	7.10776e-99	0.787014	0.526618	annexin A4 [Source:MGI Symbol;Acc:MGI:88030]
Churc1	0.220005	3.19847e-102	0.61	0.379	6.04608e-98	0.718558	0.471982	churchill domain containing 1 [Source:MGI Symbol;Acc:MGI:1923684]
Ndufb2	0.21363	8.30811e-102	0.875	0.713	1.57048e-97	1.37445	1.08032	NADH:ubiquinone oxidoreductase subunit B2 [Source:MGI Symbol;Acc:MGI:1915448]
Lamtor5	0.221483	1.65142e-101	0.62	0.391	3.12169e-97	0.725095	0.478914	late endosomal/lysosomal adaptor, MAPK and MTOR activator 5 [Source:MGI Symbol;Acc:MGI:1915826]
Akr1a1	0.221464	2.3041e-101	0.88	0.735	4.35544e-97	1.40969	1.12128	aldo-keto reductase family 1, member A1 (aldehyde reductase) [Source:MGI Symbol;Acc:MGI:1929955]
Nmt1	0.211728	2.56259e-101	0.519	0.298	4.84406e-97	0.576237	0.358476	N-myristoyltransferase 1 [Source:MGI Symbol;Acc:MGI:102579]
Arhgef38	-0.302278	7.67013e-101	0.118	0.248	1.44988e-96	0.109329	0.295269	Rho guanine nucleotide exchange factor (GEF) 38 [Source:MGI Symbol;Acc:MGI:1924919]
Slc35b1	0.192394	1.62501e-100	0.337	0.159	3.07176e-96	0.342004	0.180688	solute carrier family 35, member B1 [Source:MGI Symbol;Acc:MGI:1343133]
Polr2g	0.192174	4.44559e-100	0.449	0.24	8.40349e-96	0.46887	0.279229	polymerase (RNA) II (DNA directed) polypeptide G [Source:MGI Symbol;Acc:MGI:1914960]
Hes1	-0.565364	9.95646e-100	0.224	0.359	1.88207e-95	0.245914	0.537385	hes family bHLH transcription factor 1 [Source:MGI Symbol;Acc:MGI:104853]
Mrpl21	0.19406	1.88063e-99	0.458	0.247	3.55495e-95	0.483976	0.291226	mitochondrial ribosomal protein L21 [Source:MGI Symbol;Acc:MGI:2660674]
Psmd8	0.248769	2.00358e-99	0.612	0.391	3.78736e-95	0.737718	0.484846	proteasome (prosome, macropain) 26S subunit, non-ATPase, 8 [Source:MGI Symbol;Acc:MGI:1888669]
Snrpe	0.24513	4.47138e-99	0.735	0.522	8.45225e-95	0.976973	0.693846	small nuclear ribonucleoprotein E [Source:MGI Symbol;Acc:MGI:98346]
Tmem14c	0.221884	1.42776e-98	0.616	0.389	2.69889e-94	0.723939	0.479361	transmembrane protein 14C [Source:MGI Symbol;Acc:MGI:1913404]
Gfpt1	0.205427	3.72689e-98	0.443	0.239	7.04493e-94	0.474561	0.282283	glutamine fructose-6-phosphate transaminase 1 [Source:MGI Symbol;Acc:MGI:95698]
Hint2	0.223044	4.50628e-98	0.783	0.577	8.51822e-94	1.07568	0.792175	histidine triad nucleotide binding protein 2 [Source:MGI Symbol;Acc:MGI:1916167]
Ctsb	0.219614	1.1425e-97	0.769	0.552	2.15966e-93	1.04685	0.760707	cathepsin B [Source:MGI Symbol;Acc:MGI:88561]
Fabp12	-0.248786	1.16172e-97	0.061	0.173	2.196e-93	0.0552715	0.200436	fatty acid binding protein 12 [Source:MGI Symbol;Acc:MGI:1922747]
Ctsh	0.198506	1.46596e-97	0.965	0.899	2.7711e-93	2.21661	1.9192	cathepsin H [Source:MGI Symbol;Acc:MGI:107285]
Fundc2	0.191855	1.89669e-97	0.407	0.21	3.58531e-93	0.423783	0.245669	FUN14 domain containing 2 [Source:MGI Symbol;Acc:MGI:1914641]
Capza2	0.206132	2.96193e-97	0.537	0.314	5.59894e-93	0.602624	0.383733	capping protein (actin filament) muscle Z-line, alpha 2 [Source:MGI Symbol;Acc:MGI:106222]
Slc25a5	0.189479	6.83757e-97	0.848	0.693	1.29251e-92	1.35248	1.06824	solute carrier family 25 (mitochondrial carrier, adenine nucleotide translocator), member 5 [Source:MGI Symbol;Acc:MGI:1353496]
Socs3	-0.467196	1.19634e-96	0.137	0.267	2.26144e-92	0.137918	0.368265	suppressor of cytokine signaling 3 [Source:MGI Symbol;Acc:MGI:1201791]
Mvb12a	0.185148	7.11297e-96	0.443	0.237	1.34456e-91	0.460332	0.277113	multivesicular body subunit 12A [Source:MGI Symbol;Acc:MGI:1920961]
Ppib	0.203677	7.45843e-96	0.919	0.816	1.40987e-91	1.64316	1.37198	peptidylprolyl isomerase B [Source:MGI Symbol;Acc:MGI:97750]
Lsm6	0.20266	7.82979e-96	0.506	0.291	1.48007e-91	0.558032	0.350056	LSM6 homolog, U6 small nuclear RNA and mRNA degradation associated [Source:MGI Symbol;Acc:MGI:1925901]
Polr2l	0.217454	8.65156e-96	0.654	0.427	1.6354e-91	0.791996	0.540306	polymerase (RNA) II (DNA directed) polypeptide L [Source:MGI Symbol;Acc:MGI:1913741]
Abracl	0.203757	1.01711e-95	0.484	0.276	1.92264e-91	0.529945	0.327073	ABRA C-terminal like [Source:MGI Symbol;Acc:MGI:1920362]
Slc1a3	0.199173	1.31238e-95	0.337	0.163	2.4808e-91	0.36105	0.195183	solute carrier family 1 (glial high affinity glutamate transporter), member 3 [Source:MGI Symbol;Acc:MGI:99917]
Ndufaf3	0.196274	1.50179e-95	0.413	0.219	2.83884e-91	0.439569	0.258403	NADH:ubiquinone oxidoreductase complex assembly factor 3 [Source:MGI Symbol;Acc:MGI:1913956]
Hdc	0.232963	1.71282e-95	0.494	0.292	3.23774e-91	0.64939	0.410945	histidine decarboxylase [Source:MGI Symbol;Acc:MGI:96062]
Actr3	0.189927	2.48107e-95	0.457	0.248	4.68997e-91	0.484929	0.295664	ARP3 actin-related protein 3 [Source:MGI Symbol;Acc:MGI:1921367]
Mgst1	-0.214226	1.61332e-94	0.917	0.921	3.04965e-90	1.68601	1.89292	microsomal glutathione S-transferase 1 [Source:MGI Symbol;Acc:MGI:1913850]
Cox14	0.196131	1.76966e-94	0.808	0.597	3.34519e-90	1.1369	0.851386	cytochrome c oxidase assembly protein 14 [Source:MGI Symbol;Acc:MGI:1913629]
Plxnb2	0.187933	3.40058e-94	0.404	0.211	6.42812e-90	0.429697	0.253069	plexin B2 [Source:MGI Symbol;Acc:MGI:2154239]
Krt18	0.225018	4.75797e-94	0.78	0.581	8.99399e-90	1.21794	0.904341	keratin 18 [Source:MGI Symbol;Acc:MGI:96692]
Mrpl12	0.196698	2.27934e-93	0.501	0.287	4.30864e-89	0.539676	0.338701	mitochondrial ribosomal protein L12 [Source:MGI Symbol;Acc:MGI:1926273]
Acadl	0.185087	4.00124e-93	0.401	0.212	7.56354e-89	0.414961	0.242676	acyl-Coenzyme A dehydrogenase, long-chain [Source:MGI Symbol;Acc:MGI:87866]
Timm13	0.213552	9.46365e-93	0.843	0.664	1.78891e-88	1.24089	0.958342	translocase of inner mitochondrial membrane 13 [Source:MGI Symbol;Acc:MGI:1353432]
Degs1	-0.336653	1.47965e-92	0.34	0.449	2.79699e-88	0.344472	0.583212	delta(4)-desaturase, sphingolipid 1 [Source:MGI Symbol;Acc:MGI:1097711]
Ndufa8	0.213059	2.13132e-92	0.644	0.419	4.02883e-88	0.769092	0.524664	NADH:ubiquinone oxidoreductase subunit A8 [Source:MGI Symbol;Acc:MGI:1915625]
Slc31a1	-0.352426	9.3305e-92	0.301	0.411	1.76374e-87	0.29161	0.527317	solute carrier family 31, member 1 [Source:MGI Symbol;Acc:MGI:1333843]
Hdgf	0.215956	1.18657e-91	0.551	0.337	2.24297e-87	0.646149	0.421071	heparin binding growth factor [Source:MGI Symbol;Acc:MGI:1194494]
Arf4	0.223755	1.60411e-91	0.675	0.454	3.03225e-87	0.844311	0.587587	ADP-ribosylation factor 4 [Source:MGI Symbol;Acc:MGI:99433]
Ank3	-0.335515	1.64598e-91	0.412	0.508	3.1114e-87	0.440297	0.686389	ankyrin 3, epithelial [Source:MGI Symbol;Acc:MGI:88026]
Ywhah	0.234848	2.19745e-91	0.493	0.295	4.15385e-87	0.591651	0.371113	tyrosine 3-monooxygenase/tryptophan 5-monooxygenase activation protein, eta polypeptide [Source:MGI Symbol;Acc:MGI:109194]
Zfos1	-0.306701	4.02672e-91	0.566	0.632	7.61172e-87	0.692537	0.950168	NA
Anpep	-0.311203	8.32801e-91	0.171	0.299	1.57424e-86	0.166822	0.366293	alanyl (membrane) aminopeptidase [Source:MGI Symbol;Acc:MGI:5000466]
Ssu72	0.191122	1.88282e-90	0.58	0.357	3.55909e-86	0.655014	0.436066	Ssu72 RNA polymerase II CTD phosphatase homolog (yeast) [Source:MGI Symbol;Acc:MGI:1916241]
Alad	0.19931	1.97377e-90	0.528	0.315	3.73101e-86	0.589907	0.380676	aminolevulinate, delta-, dehydratase [Source:MGI Symbol;Acc:MGI:96853]
Slc38a2	-0.270273	2.06383e-90	0.097	0.215	3.90127e-86	0.0910167	0.254497	solute carrier family 38, member 2 [Source:MGI Symbol;Acc:MGI:1915010]
Tmed9	0.213727	2.59934e-90	0.614	0.396	4.91354e-86	0.739393	0.501393	transmembrane p24 trafficking protein 9 [Source:MGI Symbol;Acc:MGI:1914761]
Atp6v0d1	0.193713	1.38283e-89	0.559	0.337	2.61396e-85	0.620718	0.408603	ATPase, H+ transporting, lysosomal V0 subunit D1 [Source:MGI Symbol;Acc:MGI:1201778]
Ptp4a2	0.203903	8.17397e-89	0.531	0.32	1.54513e-84	0.601202	0.390198	protein tyrosine phosphatase 4a2 [Source:MGI Symbol;Acc:MGI:1277117]
Rap1b	0.208529	1.10698e-88	0.543	0.329	2.09253e-84	0.61358	0.399192	RAS related protein 1b [Source:MGI Symbol;Acc:MGI:894315]
Vpreb3	-0.417363	4.06553e-88	0.108	0.228	7.68507e-84	0.121681	0.328915	pre-B lymphocyte gene 3 [Source:MGI Symbol;Acc:MGI:98938]
Mrpl51	0.204392	1.47548e-87	0.557	0.342	2.7891e-83	0.63264	0.416024	mitochondrial ribosomal protein L51 [Source:MGI Symbol;Acc:MGI:1913743]
Rhoa	0.220793	1.6173e-87	0.748	0.541	3.05718e-83	1.00433	0.734978	ras homolog family member A [Source:MGI Symbol;Acc:MGI:1096342]
Sord	-0.245833	1.67556e-87	0.081	0.193	3.16731e-83	0.0773481	0.226386	sorbitol dehydrogenase [Source:MGI Symbol;Acc:MGI:98266]
Prr15l	0.19227	1.95267e-87	0.765	0.542	3.69113e-83	1.02189	0.751328	proline rich 15-like [Source:MGI Symbol;Acc:MGI:2387599]
Atf3	-0.564089	2.46776e-87	0.204	0.329	4.66481e-83	0.224212	0.496416	activating transcription factor 3 [Source:MGI Symbol;Acc:MGI:109384]
Sfn	0.226329	1.37388e-86	0.445	0.253	2.59704e-82	0.544444	0.34166	stratifin [Source:MGI Symbol;Acc:MGI:1891831]
Ppp1ca	0.205864	1.51203e-86	0.671	0.453	2.85819e-82	0.834458	0.586747	protein phosphatase 1 catalytic subunit alpha [Source:MGI Symbol;Acc:MGI:103016]
Ier3ip1	0.199683	1.59219e-86	0.677	0.455	3.00971e-82	0.84192	0.594179	immediate early response 3 interacting protein 1 [Source:MGI Symbol;Acc:MGI:1913441]
Abhd2	-0.386306	2.44281e-86	0.363	0.471	4.61765e-82	0.409731	0.675315	abhydrolase domain containing 2 [Source:MGI Symbol;Acc:MGI:1914344]
Ube2i	0.218122	1.11851e-85	0.719	0.514	2.11431e-81	0.940463	0.682155	ubiquitin-conjugating enzyme E2I [Source:MGI Symbol;Acc:MGI:107365]
Mtch2	0.198224	1.49221e-85	0.574	0.354	2.82073e-81	0.652369	0.434601	mitochondrial carrier 2 [Source:MGI Symbol;Acc:MGI:1929260]
Atp6v0e	0.203274	1.76904e-85	0.804	0.614	3.34402e-81	1.12852	0.859486	ATPase, H+ transporting, lysosomal V0 subunit E [Source:MGI Symbol;Acc:MGI:1328318]
Sf3b6	0.183717	2.1068e-85	0.545	0.332	3.98248e-81	0.608067	0.4031	splicing factor 3B, subunit 6 [Source:MGI Symbol;Acc:MGI:1913305]
Hprt	0.187172	2.90835e-85	0.477	0.277	5.49766e-81	0.516447	0.327707	hypoxanthine guanine phosphoribosyl transferase [Source:MGI Symbol;Acc:MGI:96217]
Myeov2	0.197978	9.73591e-85	0.864	0.708	1.84038e-80	1.32385	1.05628	NA
Gm26917	0.191646	1.22585e-84	0.476	0.274	2.31722e-80	0.521105	0.332511	predicted gene, 26917 [Source:MGI Symbol;Acc:MGI:5504032]
Acly	-0.350541	3.85053e-84	0.445	0.521	7.27866e-80	0.478074	0.725016	ATP citrate lyase [Source:MGI Symbol;Acc:MGI:103251]
Mettl7a1	-0.309007	4.95084e-84	0.58	0.636	9.35857e-80	0.701803	0.944704	methyltransferase like 7A1 [Source:MGI Symbol;Acc:MGI:1916523]
Eif6	0.185197	5.83824e-84	0.406	0.223	1.1036e-79	0.425369	0.256943	eukaryotic translation initiation factor 6 [Source:MGI Symbol;Acc:MGI:1196288]
Rhob	-0.331851	9.1539e-84	0.145	0.264	1.73036e-79	0.141781	0.336093	ras homolog family member B [Source:MGI Symbol;Acc:MGI:107949]
Npc1	-0.322845	9.2005e-84	0.223	0.339	1.73917e-79	0.217651	0.426697	NPC intracellular cholesterol transporter 1 [Source:MGI Symbol;Acc:MGI:1097712]
Hspa8	-0.216078	1.83225e-83	0.922	0.916	3.46351e-79	1.6675	1.8645	heat shock protein 8 [Source:MGI Symbol;Acc:MGI:105384]
Ube2a	0.182568	2.63707e-83	0.485	0.283	4.98485e-79	0.520193	0.334554	ubiquitin-conjugating enzyme E2A [Source:MGI Symbol;Acc:MGI:102959]
Elovl1	-0.278825	2.76641e-83	0.846	0.853	5.22934e-79	1.50054	1.76937	elongation of very long chain fatty acids (FEN1/Elo2, SUR4/Elo3, yeast)-like 1 [Source:MGI Symbol;Acc:MGI:1858959]
Dut	0.198825	3.99398e-83	0.248	0.111	7.54982e-79	0.265562	0.128446	deoxyuridine triphosphatase [Source:MGI Symbol;Acc:MGI:1346051]
Aldoa	0.205368	4.45163e-83	0.821	0.649	8.41491e-79	1.22323	0.951888	aldolase A, fructose-bisphosphate [Source:MGI Symbol;Acc:MGI:87994]
Snx3	0.193783	1.16486e-82	0.611	0.399	2.20194e-78	0.727984	0.503033	sorting nexin 3 [Source:MGI Symbol;Acc:MGI:1860188]
Sat1	0.238052	5.33585e-82	0.762	0.574	1.00864e-77	1.10151	0.823395	spermidine/spermine N1-acetyl transferase 1 [Source:MGI Symbol;Acc:MGI:98233]
Ndufb3	0.192244	1.10403e-81	0.819	0.648	2.08694e-77	1.18075	0.921754	NADH:ubiquinone oxidoreductase subunit B3 [Source:MGI Symbol;Acc:MGI:1913745]
1110008F13Rik	0.215704	1.99674e-81	0.699	0.494	3.77444e-77	0.900706	0.650058	NA
Mrpl32	0.182839	2.33073e-81	0.521	0.315	4.40578e-77	0.571686	0.377115	mitochondrial ribosomal protein L32 [Source:MGI Symbol;Acc:MGI:2137226]
Sri	0.184263	2.62341e-81	0.557	0.348	4.95903e-77	0.649147	0.439431	sorcin [Source:MGI Symbol;Acc:MGI:98419]
Anp32b	0.204376	3.2562e-81	0.468	0.279	6.1552e-77	0.530117	0.337753	acidic (leucine-rich) nuclear phosphoprotein 32 family, member B [Source:MGI Symbol;Acc:MGI:1914878]
Atp6v1c2	-0.311936	6.4035e-81	0.295	0.404	1.21045e-76	0.296517	0.512213	ATPase, H+ transporting, lysosomal V1 subunit C2 [Source:MGI Symbol;Acc:MGI:1916025]
Ccdc34	0.183861	7.34745e-81	0.159	0.054	1.38889e-76	0.177132	0.0662539	coiled-coil domain containing 34 [Source:MGI Symbol;Acc:MGI:1915451]
Ndufs7	0.192979	9.75212e-81	0.798	0.612	1.84344e-76	1.10814	0.849549	NADH:ubiquinone oxidoreductase core subunit S7 [Source:MGI Symbol;Acc:MGI:1922656]
Rap1gap	-0.271872	1.11248e-80	0.094	0.201	2.10292e-76	0.085859	0.241233	Rap1 GTPase-activating protein [Source:MGI Symbol;Acc:MGI:109338]
Spry1	-0.326111	2.44417e-80	0.194	0.309	4.62021e-76	0.18807	0.391251	sprouty RTK signaling antagonist 1 [Source:MGI Symbol;Acc:MGI:1345139]
Cd47	0.232699	4.67363e-80	0.593	0.392	8.83456e-76	0.724586	0.49363	CD47 antigen (Rh-related antigen, integrin-associated signal transducer) [Source:MGI Symbol;Acc:MGI:96617]
Tfrc	0.214195	1.12159e-79	0.437	0.257	2.12013e-75	0.507506	0.318345	transferrin receptor [Source:MGI Symbol;Acc:MGI:98822]
Bax	0.188009	1.07263e-78	0.464	0.272	2.0276e-74	0.507606	0.32639	BCL2-associated X protein [Source:MGI Symbol;Acc:MGI:99702]
Ldlr	-0.274198	4.41772e-78	0.115	0.225	8.35082e-74	0.109459	0.273861	low density lipoprotein receptor [Source:MGI Symbol;Acc:MGI:96765]
Eef2	-0.224972	1.74976e-76	0.871	0.861	3.30758e-72	1.3603	1.54886	eukaryotic translation elongation factor 2 [Source:MGI Symbol;Acc:MGI:95288]
Cited2	-0.341424	8.29311e-76	0.52	0.594	1.56765e-71	0.654933	0.914209	Cbp/p300-interacting transactivator, with Glu/Asp-rich carboxy-terminal domain, 2 [Source:MGI Symbol;Acc:MGI:1306784]
Rab11a	0.185864	1.40097e-75	0.612	0.404	2.64825e-71	0.721854	0.506672	RAB11A, member RAS oncogene family [Source:MGI Symbol;Acc:MGI:1858202]
2410015M20Rik	0.18301	2.66075e-75	0.812	0.636	5.02961e-71	1.1648	0.910844	NA
U2af1	0.183364	2.97938e-74	0.614	0.402	5.63191e-70	0.718585	0.504797	U2 small nuclear ribonucleoprotein auxiliary factor (U2AF) 1 [Source:MGI Symbol;Acc:MGI:98884]
Cuta	0.192401	3.10679e-74	0.695	0.483	5.87277e-70	0.871365	0.634417	cutA divalent cation tolerance homolog [Source:MGI Symbol;Acc:MGI:1914925]
Ndufa1	0.18234	2.63389e-73	0.784	0.596	4.97884e-69	1.07168	0.824664	NADH:ubiquinone oxidoreductase subunit A1 [Source:MGI Symbol;Acc:MGI:1929511]
Etv5	-0.306345	5.89161e-73	0.571	0.612	1.11369e-68	0.674317	0.898483	ets variant 5 [Source:MGI Symbol;Acc:MGI:1096867]
Insig1	-0.361201	7.16562e-73	0.222	0.333	1.35452e-68	0.232977	0.450003	insulin induced gene 1 [Source:MGI Symbol;Acc:MGI:1916289]
Cnpy2	0.187866	2.13778e-72	0.671	0.469	4.04105e-68	0.835114	0.60807	canopy FGF signaling regulator 2 [Source:MGI Symbol;Acc:MGI:1928477]
Myl12b	0.231037	2.09432e-71	0.791	0.629	3.95889e-67	1.16216	0.902005	myosin, light chain 12B, regulatory [Source:MGI Symbol;Acc:MGI:107494]
Manf	0.223087	7.12366e-70	0.681	0.504	1.34658e-65	0.948284	0.702678	mesencephalic astrocyte-derived neurotrophic factor [Source:MGI Symbol;Acc:MGI:1922090]
Cox6a2	-0.315785	8.59667e-70	0.515	0.602	1.62503e-65	0.712713	0.980983	cytochrome c oxidase subunit 6A2 [Source:MGI Symbol;Acc:MGI:104649]
Abcd3	0.188935	1.58129e-69	0.695	0.494	2.98911e-65	0.889774	0.658586	ATP-binding cassette, sub-family D (ALD), member 3 [Source:MGI Symbol;Acc:MGI:1349216]
Tinagl1	-0.280946	2.85054e-69	0.175	0.282	5.38838e-65	0.168386	0.342901	tubulointerstitial nephritis antigen-like 1 [Source:MGI Symbol;Acc:MGI:2137617]
1810010H24Rik	-0.230465	3.16175e-69	0.056	0.143	5.97665e-65	0.0480667	0.171516	RIKEN cDNA 1810010H24 gene [Source:MGI Symbol;Acc:MGI:1916316]
Creg1	-0.26179	2.63385e-68	0.593	0.622	4.97877e-64	0.684789	0.880067	cellular repressor of E1A-stimulated genes 1 [Source:MGI Symbol;Acc:MGI:1344382]
Atp2a2	0.182517	7.26416e-67	0.487	0.306	1.37315e-62	0.550158	0.372002	ATPase, Ca++ transporting, cardiac muscle, slow twitch 2 [Source:MGI Symbol;Acc:MGI:88110]
Gstt1	0.18542	1.3191e-66	0.716	0.525	2.49349e-62	0.949077	0.715987	glutathione S-transferase, theta 1 [Source:MGI Symbol;Acc:MGI:107379]
Tob1	-0.300774	6.36296e-66	0.182	0.284	1.20279e-61	0.177213	0.35862	transducer of ErbB-2.1 [Source:MGI Symbol;Acc:MGI:1349721]
Prps2	-0.299624	6.4423e-66	0.235	0.333	1.21779e-61	0.225353	0.414642	phosphoribosyl pyrophosphate synthetase 2 [Source:MGI Symbol;Acc:MGI:97776]
Plp2	0.183203	2.61245e-65	0.553	0.366	4.93831e-61	0.66397	0.467663	proteolipid protein 2 [Source:MGI Symbol;Acc:MGI:1298382]
Lpin2	-0.286821	5.43995e-65	0.238	0.336	1.02831e-60	0.235045	0.421443	lipin 2 [Source:MGI Symbol;Acc:MGI:1891341]
Vldlr	-0.187538	7.01603e-64	0.049	0.131	1.32624e-59	0.0463651	0.151265	very low density lipoprotein receptor [Source:MGI Symbol;Acc:MGI:98935]
Vsig2	-0.262587	1.30632e-63	0.162	0.264	2.46934e-59	0.157708	0.320936	V-set and immunoglobulin domain containing 2 [Source:MGI Symbol;Acc:MGI:1928009]
D230025D16Rik	-0.278658	1.56537e-63	0.193	0.29	2.95903e-59	0.180948	0.353737	RIKEN cDNA D230025D16 gene [Source:MGI Symbol;Acc:MGI:2443049]
Ccnd2	-0.27245	1.19763e-62	0.071	0.16	2.26388e-58	0.073973	0.208679	cyclin D2 [Source:MGI Symbol;Acc:MGI:88314]
Slc6a6	-0.228396	9.75286e-62	0.097	0.19	1.84358e-57	0.093476	0.226965	solute carrier family 6 (neurotransmitter transporter, taurine), member 6 [Source:MGI Symbol;Acc:MGI:98488]
Gsta3	-0.226942	1.17423e-61	0.065	0.148	2.21965e-57	0.056704	0.176733	glutathione S-transferase, alpha 3 [Source:MGI Symbol;Acc:MGI:95856]
Hnrnpa2b1	0.186603	6.28264e-61	0.789	0.619	1.18761e-56	1.11384	0.877564	heterogeneous nuclear ribonucleoprotein A2/B1 [Source:MGI Symbol;Acc:MGI:104819]
Fam84b	-0.218645	7.80869e-61	0.101	0.194	1.47608e-56	0.0962288	0.227783	NA
Serbp1	0.191524	8.29259e-61	0.7	0.522	1.56755e-56	0.910239	0.690715	serpine1 mRNA binding protein 1 [Source:MGI Symbol;Acc:MGI:1914120]
Cyp2f2	-0.450416	9.43842e-60	0.138	0.238	1.78414e-55	0.16998	0.372397	cytochrome P450, family 2, subfamily f, polypeptide 2 [Source:MGI Symbol;Acc:MGI:88608]
Tmem159	-0.280475	9.22783e-59	0.246	0.335	1.74434e-54	0.233493	0.410832	transmembrane protein 159 [Source:MGI Symbol;Acc:MGI:1925752]
Lpl	-0.220054	2.06152e-58	0.088	0.176	3.89689e-54	0.0834334	0.21029	lipoprotein lipase [Source:MGI Symbol;Acc:MGI:96820]
Epcam	0.235263	2.27904e-58	0.667	0.492	4.30806e-54	0.89119	0.664849	epithelial cell adhesion molecule [Source:MGI Symbol;Acc:MGI:106653]
Sdc4	0.193906	5.73017e-58	0.883	0.759	1.08317e-53	1.50085	1.25185	syndecan 4 [Source:MGI Symbol;Acc:MGI:1349164]
Gm9843	-0.227315	8.16336e-58	0.714	0.708	1.54312e-53	0.902761	1.07105	predicted gene 9843 [Source:MGI Symbol;Acc:MGI:3708621]
Plekhb1	-0.263454	4.20643e-57	0.208	0.3	7.95142e-53	0.199827	0.365016	pleckstrin homology domain containing, family B (evectins) member 1 [Source:MGI Symbol;Acc:MGI:1351469]
Npm1	0.197058	9.35991e-57	0.822	0.664	1.7693e-52	1.23254	0.990104	nucleophosmin 1 [Source:MGI Symbol;Acc:MGI:106184]
Nfkbia	0.218888	3.14643e-56	0.453	0.298	5.9477e-52	0.624382	0.434127	nuclear factor of kappa light polypeptide gene enhancer in B cells inhibitor, alpha [Source:MGI Symbol;Acc:MGI:104741]
Zfp36l1	-0.260255	1.20816e-55	0.559	0.595	2.28378e-51	0.669281	0.866613	zinc finger protein 36, C3H type-like 1 [Source:MGI Symbol;Acc:MGI:107946]
Aldh6a1	-0.199058	4.74577e-54	0.076	0.156	8.97093e-50	0.0682275	0.180621	aldehyde dehydrogenase family 6, subfamily A1 [Source:MGI Symbol;Acc:MGI:1915077]
Anxa2	0.200532	3.38981e-53	0.825	0.684	6.40776e-49	1.30559	1.06515	annexin A2 [Source:MGI Symbol;Acc:MGI:88246]
Sult1a1	-0.219841	1.40983e-52	0.101	0.185	2.665e-48	0.0932054	0.218047	sulfotransferase family 1A, phenol-preferring, member 1 [Source:MGI Symbol;Acc:MGI:102896]
Nucks1	0.19049	1.06447e-51	0.494	0.334	2.01216e-47	0.57816	0.408886	nuclear casein kinase and cyclin-dependent kinase substrate 1 [Source:MGI Symbol;Acc:MGI:1934811]
Zfp36	-0.339432	2.303e-51	0.559	0.578	4.35337e-47	0.651467	0.856463	zinc finger protein 36 [Source:MGI Symbol;Acc:MGI:99180]
Dek	0.191781	1.1922e-49	0.54	0.376	2.25361e-45	0.659724	0.479753	DEK oncogene (DNA binding) [Source:MGI Symbol;Acc:MGI:1926209]
Sec14l4	-0.199266	1.52786e-49	0.101	0.182	2.88812e-45	0.0925965	0.209288	SEC14-like lipid binding 4 [Source:MGI Symbol;Acc:MGI:2144095]
Bex1	-0.2262	3.65162e-49	0.072	0.147	6.90266e-45	0.0690151	0.183111	brain expressed X-linked 1 [Source:MGI Symbol;Acc:MGI:1328321]
Foxa1	-0.221699	4.3221e-49	0.133	0.218	8.17007e-45	0.125841	0.257888	forkhead box A1 [Source:MGI Symbol;Acc:MGI:1347472]
Son	-0.210703	6.89736e-48	0.709	0.705	1.30381e-43	0.904272	1.05896	Son DNA binding protein [Source:MGI Symbol;Acc:MGI:98353]
Mat2a	0.206208	3.21597e-47	0.526	0.37	6.07914e-43	0.651254	0.474058	methionine adenosyltransferase II, alpha [Source:MGI Symbol;Acc:MGI:2443731]
Gstp1	-0.34137	5.63604e-47	0.487	0.513	1.06538e-42	0.519008	0.709581	glutathione S-transferase, pi 1 [Source:MGI Symbol;Acc:MGI:95865]
Gadd45b	-0.270761	6.30333e-47	0.161	0.246	1.19152e-42	0.163484	0.316286	growth arrest and DNA-damage-inducible 45 beta [Source:MGI Symbol;Acc:MGI:107776]
Sod1	-0.251423	7.40853e-47	0.532	0.554	1.40043e-42	0.5945	0.766035	superoxide dismutase 1, soluble [Source:MGI Symbol;Acc:MGI:98351]
Ube2s	0.236593	7.41288e-47	0.589	0.43	1.40126e-42	0.758043	0.558532	ubiquitin-conjugating enzyme E2S [Source:MGI Symbol;Acc:MGI:1925141]
Adck4	-0.238532	8.9641e-47	0.201	0.281	1.69448e-42	0.187967	0.334893	NA
Oat	-0.214365	2.19512e-46	0.672	0.667	4.14943e-42	0.837868	0.991038	ornithine aminotransferase [Source:MGI Symbol;Acc:MGI:97394]
Hspb1	-0.229495	2.32959e-46	0.421	0.498	4.40362e-42	0.540395	0.731979	heat shock protein 1 [Source:MGI Symbol;Acc:MGI:96240]
Dnase2a	-0.23147	3.0244e-46	0.159	0.241	5.71703e-42	0.149949	0.287707	deoxyribonuclease II alpha [Source:MGI Symbol;Acc:MGI:1329019]
Serinc3	-0.252922	1.18888e-45	0.247	0.322	2.24733e-41	0.240595	0.398998	serine incorporator 3 [Source:MGI Symbol;Acc:MGI:1349457]
Nedd4l	-0.193461	2.70485e-45	0.092	0.167	5.11297e-41	0.083508	0.193468	neural precursor cell expressed, developmentally down-regulated gene 4-like [Source:MGI Symbol;Acc:MGI:1933754]
Myh14	-0.246159	9.33466e-44	0.286	0.358	1.76453e-39	0.291192	0.451495	myosin, heavy polypeptide 14 [Source:MGI Symbol;Acc:MGI:1919210]
Ppp1r15a	-0.190709	9.41757e-44	0.09	0.164	1.7802e-39	0.0838619	0.191372	protein phosphatase 1, regulatory subunit 15A [Source:MGI Symbol;Acc:MGI:1927072]
Dynlrb2	-0.496712	9.45404e-44	0.193	0.272	1.7871e-39	0.224694	0.436566	dynein light chain roadblock-type 2 [Source:MGI Symbol;Acc:MGI:1922715]
Aplp2	-0.216986	6.06497e-43	0.638	0.638	1.14646e-38	0.768347	0.921511	amyloid beta (A4) precursor-like protein 2 [Source:MGI Symbol;Acc:MGI:88047]
Tsc22d1	-0.305255	7.70279e-43	0.611	0.622	1.45606e-38	0.751446	0.936272	TSC22 domain family, member 1 [Source:MGI Symbol;Acc:MGI:109127]
Adamts1	-0.206735	1.50998e-42	0.056	0.12	2.85431e-38	0.0548208	0.153714	a disintegrin-like and metallopeptidase (reprolysin type) with thrombospondin type 1 motif, 1 [Source:MGI Symbol;Acc:MGI:109249]
Ptprf	-0.233039	3.30813e-42	0.613	0.613	6.25336e-38	0.731808	0.890053	protein tyrosine phosphatase, receptor type, F [Source:MGI Symbol;Acc:MGI:102695]
Brd2	-0.24437	4.1678e-42	0.236	0.308	7.87839e-38	0.227408	0.3789	bromodomain containing 2 [Source:MGI Symbol;Acc:MGI:99495]
Mlc1	-0.234353	1.08817e-41	0.347	0.406	2.05697e-37	0.354728	0.51215	megalencephalic leukoencephalopathy with subcortical cysts 1 homolog (human) [Source:MGI Symbol;Acc:MGI:2157910]
Pim3	-0.26306	2.72736e-40	0.268	0.337	5.15554e-36	0.271768	0.432139	proviral integration site 3 [Source:MGI Symbol;Acc:MGI:1355297]
Pink1	-0.190751	6.59534e-40	0.102	0.173	1.24672e-35	0.0945196	0.202363	PTEN induced putative kinase 1 [Source:MGI Symbol;Acc:MGI:1916193]
Timp3	-0.341748	6.75111e-40	0.209	0.286	1.27616e-35	0.227184	0.398009	tissue inhibitor of metalloproteinase 3 [Source:MGI Symbol;Acc:MGI:98754]
Atp1a1	-0.225439	1.44595e-39	0.514	0.536	2.73329e-35	0.577923	0.735872	ATPase, Na+/K+ transporting, alpha 1 polypeptide [Source:MGI Symbol;Acc:MGI:88105]
Srebf1	-0.189235	1.86602e-38	0.12	0.192	3.52734e-34	0.112009	0.222953	sterol regulatory element binding transcription factor 1 [Source:MGI Symbol;Acc:MGI:107606]
Klf9	-0.263631	9.93885e-38	0.348	0.396	1.87874e-33	0.353777	0.51598	Kruppel-like factor 9 [Source:MGI Symbol;Acc:MGI:1333856]
Ddx3x	-0.241272	1.58249e-37	0.334	0.387	2.99138e-33	0.336923	0.491004	DEAD/H (Asp-Glu-Ala-Asp/His) box polypeptide 3, X-linked [Source:MGI Symbol;Acc:MGI:103064]
Ahnak	-0.230958	6.64459e-37	0.21	0.28	1.25603e-32	0.20831	0.34746	AHNAK nucleoprotein (desmoyokin) [Source:MGI Symbol;Acc:MGI:1316648]
Fads1	-0.18963	2.23514e-36	0.1	0.166	4.22509e-32	0.0919262	0.196527	fatty acid desaturase 1 [Source:MGI Symbol;Acc:MGI:1923517]
Scgb1a1	0.267621	2.6606e-36	1	1	5.02933e-32	3.68444	3.74269	secretoglobin, family 1A, member 1 (uteroglobin) [Source:MGI Symbol;Acc:MGI:98919]
Yae1d1	-0.22727	3.20815e-36	0.277	0.336	6.06437e-32	0.271253	0.413696	Yae1 domain containing 1 [Source:MGI Symbol;Acc:MGI:1914258]
Adgrg1	-0.205429	5.44532e-35	0.19	0.258	1.02933e-30	0.17973	0.304907	adhesion G protein-coupled receptor G1 [Source:MGI Symbol;Acc:MGI:1340051]
Tspan11	-0.234677	1.75079e-34	0.406	0.442	3.30951e-30	0.421002	0.570301	tetraspanin 11 [Source:MGI Symbol;Acc:MGI:1915748]
Spop	-0.225563	2.50572e-34	0.168	0.234	4.73657e-30	0.159215	0.287056	speckle-type BTB/POZ protein [Source:MGI Symbol;Acc:MGI:1343085]
Ppp1r9a	-0.215612	5.58655e-34	0.279	0.338	1.05602e-29	0.278649	0.416286	protein phosphatase 1, regulatory subunit 9A [Source:MGI Symbol;Acc:MGI:2442401]
Pnrc1	-0.25649	8.46159e-34	0.381	0.421	1.59949e-29	0.399604	0.556618	proline-rich nuclear receptor coactivator 1 [Source:MGI Symbol;Acc:MGI:1917838]
Osgin1	-0.215049	5.38787e-33	0.06	0.115	1.01847e-28	0.0554285	0.145451	oxidative stress induced growth inhibitor 1 [Source:MGI Symbol;Acc:MGI:1919089]
Atf4	-0.208931	7.64524e-33	0.309	0.364	1.44518e-28	0.319295	0.460348	activating transcription factor 4 [Source:MGI Symbol;Acc:MGI:88096]
Ier3	-0.289748	8.4797e-33	0.19	0.257	1.60292e-28	0.197023	0.34225	immediate early response 3 [Source:MGI Symbol;Acc:MGI:104814]
Rprm	-0.197536	8.54504e-33	0.144	0.209	1.61527e-28	0.135726	0.24832	reprimo, TP53 dependent G2 arrest mediator candidate [Source:MGI Symbol;Acc:MGI:1915124]
Ddrgk1	-0.202472	6.63632e-32	0.417	0.447	1.25446e-27	0.431389	0.565053	DDRGK domain containing 1 [Source:MGI Symbol;Acc:MGI:1924256]
Slc9a3r2	-0.209647	2.2672e-31	0.198	0.261	4.2857e-27	0.188845	0.311911	solute carrier family 9 (sodium/hydrogen exchanger), member 3 regulator 2 [Source:MGI Symbol;Acc:MGI:1890662]
Ypel3	-0.219145	2.66609e-31	0.394	0.43	5.03972e-27	0.412154	0.554121	yippee like 3 [Source:MGI Symbol;Acc:MGI:1913340]
Fam129b	-0.20183	2.86595e-31	0.195	0.258	5.41751e-27	0.187902	0.309397	family with sequence similarity 129, member B [Source:MGI Symbol;Acc:MGI:2442910]
Sec14l3	-0.348578	1.64655e-30	0.119	0.183	3.11246e-26	0.141562	0.281339	SEC14-like lipid binding 3 [Source:MGI Symbol;Acc:MGI:3617848]
Por	-0.204228	4.40822e-30	0.274	0.33	8.33286e-26	0.279908	0.412217	P450 (cytochrome) oxidoreductase [Source:MGI Symbol;Acc:MGI:97744]
Itih4	-0.266488	4.49784e-30	0.175	0.239	8.50226e-26	0.181699	0.317365	inter alpha-trypsin inhibitor, heavy chain 4 [Source:MGI Symbol;Acc:MGI:109536]
Scnn1a	-0.217837	1.19145e-29	0.232	0.291	2.2522e-25	0.233587	0.364432	sodium channel, nonvoltage-gated 1 alpha [Source:MGI Symbol;Acc:MGI:101782]
Tmem205	-0.202852	2.17938e-29	0.496	0.505	4.11968e-25	0.537991	0.669189	transmembrane protein 205 [Source:MGI Symbol;Acc:MGI:3045495]
Chchd7	-0.185513	5.50146e-29	0.128	0.187	1.03994e-24	0.117246	0.219023	coiled-coil-helix-coiled-coil-helix domain containing 7 [Source:MGI Symbol;Acc:MGI:1913683]
Ing2	-0.18364	1.41722e-27	0.138	0.196	2.67898e-23	0.127047	0.230008	inhibitor of growth family, member 2 [Source:MGI Symbol;Acc:MGI:1916510]
Rpl23a-ps3	-0.204392	4.60444e-27	0.482	0.488	8.70377e-23	0.511775	0.639313	ribosomal protein L23A, pseudogene 3 [Source:MGI Symbol;Acc:MGI:3781353]
Swt1	-0.209391	5.59287e-26	0.492	0.5	1.05722e-21	0.543504	0.6748	SWT1 RNA endoribonuclease homolog (S. cerevisiae) [Source:MGI Symbol;Acc:MGI:1914125]
1110017D15Rik	-0.53103	6.34724e-26	0.062	0.111	1.19982e-21	0.0909055	0.232013	RIKEN cDNA 1110017D15 gene [Source:MGI Symbol;Acc:MGI:1920971]
mt-Atp8	-0.190435	9.53499e-26	0.356	0.39	1.8024e-21	0.36403	0.487251	mitochondrially encoded ATP synthase 8 [Source:MGI Symbol;Acc:MGI:99926]
Nucb2	-0.198539	9.78136e-26	0.447	0.466	1.84897e-21	0.487104	0.616148	nucleobindin 2 [Source:MGI Symbol;Acc:MGI:1858179]
Pdlim2	-0.203538	1.5212e-25	0.231	0.282	2.87552e-21	0.224775	0.344421	PDZ and LIM domain 2 [Source:MGI Symbol;Acc:MGI:2384850]
Fkbp4	-0.197112	6.54633e-25	0.544	0.535	1.23745e-20	0.606791	0.726611	FK506 binding protein 4 [Source:MGI Symbol;Acc:MGI:95543]
Gabarapl1	-0.194561	1.02914e-24	0.122	0.175	1.94538e-20	0.113319	0.214063	gamma-aminobutyric acid (GABA) A receptor-associated protein-like 1 [Source:MGI Symbol;Acc:MGI:1914980]
Cd24a	-0.305551	1.06145e-24	0.33	0.227	2.00646e-20	0.439356	0.404896	CD24a antigen [Source:MGI Symbol;Acc:MGI:88323]
Hnrnph1	-0.196101	4.66317e-24	0.325	0.361	8.81479e-20	0.327516	0.449619	heterogeneous nuclear ribonucleoprotein H1 [Source:MGI Symbol;Acc:MGI:1891925]
Imp3	-0.2075	8.71644e-24	0.39	0.409	1.64767e-19	0.395302	0.519206	IMP3, U3 small nucleolar ribonucleoprotein [Source:MGI Symbol;Acc:MGI:1916119]
Slc25a51	-0.200522	6.92871e-23	0.288	0.328	1.30973e-18	0.282918	0.40151	solute carrier family 25, member 51 [Source:MGI Symbol;Acc:MGI:2684984]
Tuba1a	-0.441338	7.02758e-23	0.084	0.133	1.32842e-18	0.110141	0.24832	tubulin, alpha 1A [Source:MGI Symbol;Acc:MGI:98869]
Gtf2i	-0.184097	7.57226e-23	0.195	0.245	1.43138e-18	0.185444	0.291492	general transcription factor II I [Source:MGI Symbol;Acc:MGI:1202722]
Mecom	-0.204755	1.12617e-22	0.358	0.385	2.12879e-18	0.36738	0.491115	MDS1 and EVI1 complex locus [Source:MGI Symbol;Acc:MGI:95457]
Ctsl	-0.211356	1.83303e-22	0.231	0.278	3.46498e-18	0.226111	0.341921	cathepsin L [Source:MGI Symbol;Acc:MGI:88564]
Cadm1	-0.189582	2.07073e-22	0.501	0.502	3.9143e-18	0.55496	0.672688	cell adhesion molecule 1 [Source:MGI Symbol;Acc:MGI:1889272]
Chd3	-0.186402	2.18137e-22	0.272	0.314	4.12344e-18	0.268724	0.382481	chromodomain helicase DNA binding protein 3 [Source:MGI Symbol;Acc:MGI:1344395]
Dhrs3	-0.185116	3.27711e-22	0.454	0.466	6.19473e-18	0.489472	0.606381	dehydrogenase/reductase (SDR family) member 3 [Source:MGI Symbol;Acc:MGI:1315215]
Gem	-0.22286	1.87532e-21	0.171	0.22	3.54492e-17	0.170094	0.282327	GTP binding protein (gene overexpressed in skeletal muscle) [Source:MGI Symbol;Acc:MGI:99844]
Zbtb20	-0.216213	2.90485e-19	0.273	0.309	5.49103e-15	0.279177	0.397434	zinc finger and BTB domain containing 20 [Source:MGI Symbol;Acc:MGI:1929213]
Tra2b	-0.20024	8.76918e-19	0.492	0.489	1.65764e-14	0.547718	0.662728	transformer 2 beta [Source:MGI Symbol;Acc:MGI:106016]
Aldh1a1	-0.287888	2.01017e-16	0.064	0.101	3.79982e-12	0.0873748	0.1843	aldehyde dehydrogenase family 1, subfamily A1 [Source:MGI Symbol;Acc:MGI:1353450]
Itm2c	-0.186689	2.59809e-16	0.37	0.385	4.91117e-12	0.379705	0.484714	integral membrane protein 2C [Source:MGI Symbol;Acc:MGI:1927594]
Cfap126	-0.331196	1.01469e-15	0.07	0.106	1.91806e-11	0.0881961	0.190008	cilia and flagella associated protein 126 [Source:MGI Symbol;Acc:MGI:1922722]
Mgp	-0.563348	1.07039e-15	0.133	0.173	2.02336e-11	0.146898	0.264655	matrix Gla protein [Source:MGI Symbol;Acc:MGI:96976]
Limch1	-0.224489	2.40627e-15	0.159	0.197	4.54858e-11	0.153506	0.249219	LIM and calponin homology domains 1 [Source:MGI Symbol;Acc:MGI:1924819]
PISD	-0.193765	2.47632e-08	0.197	0.217	0.000468099	0.197205	0.281212	NA

## Sheet: KO HDM vs KO Saline updated
Gene	avg_logFC	p_val	pct.1	pct.2	p_val_adj	mean.KO.HDM	mean.KO.Saline	Gene.description
Retnla	5.58628	0	1	0.221	0	6.68535	0.331274	resistin like alpha [Source:MGI Symbol;Acc:MGI:1888504]
Fxyd4	2.18063	0	0.876	0.017	0	1.79489	0.0214575	FXYD domain-containing ion transport regulator 4 [Source:MGI Symbol;Acc:MGI:1889005]
B2m	1.9378	0	0.999	0.769	0	3.79948	1.52629	beta-2 microglobulin [Source:MGI Symbol;Acc:MGI:88127]
Chia1	1.90494	0	0.992	0.653	0	3.45401	1.30533	chitinase, acidic 1 [Source:MGI Symbol;Acc:MGI:1932052]
Slc26a4	1.62996	0	0.845	0.015	0	1.40588	0.0196107	solute carrier family 26, member 4 [Source:MGI Symbol;Acc:MGI:1346029]
H2-K1	1.38001	0	0.996	0.697	0	2.86997	1.2497	histocompatibility 2, K1, K region [Source:MGI Symbol;Acc:MGI:95904]
Ifi27l2a	1.36129	0	0.703	0.082	0	1.27407	0.154167	interferon, alpha-inducible protein 27 like 2A [Source:MGI Symbol;Acc:MGI:1924183]
Lcn2	1.32447	0	0.989	0.77	0	3.30461	1.67509	lipocalin 2 [Source:MGI Symbol;Acc:MGI:96757]
Pglyrp1	1.30804	0	0.61	0.038	0	0.907521	0.0518904	peptidoglycan recognition protein 1 [Source:MGI Symbol;Acc:MGI:1345092]
H2-Q7	1.24823	0	0.728	0.043	0	1.07955	0.0576873	histocompatibility 2, Q region locus 7 [Source:MGI Symbol;Acc:MGI:95936]
H2-D1	1.245	0	0.995	0.787	0	2.92881	1.486	histocompatibility 2, D region locus 1 [Source:MGI Symbol;Acc:MGI:95896]
Tmem213	1.22286	0	0.724	0.085	0	1.13016	0.114508	transmembrane protein 213 [Source:MGI Symbol;Acc:MGI:1924772]
Il33	1.16971	0	0.904	0.444	0	1.99793	0.727115	interleukin 33 [Source:MGI Symbol;Acc:MGI:1924375]
Clu	1.15014	0	0.833	0.292	0	1.48908	0.437016	clusterin [Source:MGI Symbol;Acc:MGI:88423]
Ly6i	1.14421	0	0.595	0.062	0	0.908422	0.0905081	lymphocyte antigen 6 complex, locus I [Source:MGI Symbol;Acc:MGI:1888480]
Prdx4	1.11032	0	0.833	0.22	0	1.38094	0.30105	peroxiredoxin 4 [Source:MGI Symbol;Acc:MGI:1859815]
Car2	1.05387	0	0.797	0.248	0	1.32548	0.34523	carbonic anhydrase 2 [Source:MGI Symbol;Acc:MGI:88269]
Serpinb6b	1.01274	0	0.794	0.256	0	1.30341	0.361146	serine (or cysteine) peptidase inhibitor, clade B, member 6b [Source:MGI Symbol;Acc:MGI:894688]
Mt2	0.985843	0	0.839	0.295	0	1.7937	0.562182	metallothionein 2 [Source:MGI Symbol;Acc:MGI:97172]
Gclc	0.943629	0	0.948	0.52	0	1.99262	0.869096	glutamate-cysteine ligase, catalytic subunit [Source:MGI Symbol;Acc:MGI:104990]
Gapdh	0.939409	0	0.963	0.621	0	2.11277	1.01412	glyceraldehyde-3-phosphate dehydrogenase [Source:MGI Symbol;Acc:MGI:95640]
H2afz	0.926707	0	0.936	0.673	0	2.00278	1.14782	H2A histone family, member Z [Source:MGI Symbol;Acc:MGI:1888388]
Slpi	0.836858	0	0.759	0.302	0	1.26325	0.455751	secretory leukocyte peptidase inhibitor [Source:MGI Symbol;Acc:MGI:109297]
Mt1	0.835275	0	0.969	0.69	0	2.72999	1.47003	metallothionein 1 [Source:MGI Symbol;Acc:MGI:97171]
Atp5f1	0.797142	0	0.934	0.57	0	1.82844	0.889003	ATP synthase, H+ transporting, mitochondrial F0 complex, subunit B1 [Source:MGI Symbol;Acc:MGI:1100495]
Chil1	0.795002	0	0.996	0.936	0	3.59082	2.67277	chitinase-like 1 [Source:MGI Symbol;Acc:MGI:1340899]
Ly6e	0.779665	0	0.99	0.811	0	2.636	1.6315	lymphocyte antigen 6 complex, locus E [Source:MGI Symbol;Acc:MGI:106651]
Wbp5	0.759666	0	0.984	0.858	0	2.6325	1.75927	NA
C3	0.756797	0	0.699	0.185	0	0.975337	0.261157	complement component 3 [Source:MGI Symbol;Acc:MGI:88227]
2200002D01Rik	0.746325	0	0.509	0.089	0	0.652767	0.118229	RIKEN cDNA 2200002D01 gene [Source:MGI Symbol;Acc:MGI:1919525]
Psmb8	0.740808	0	0.653	0.146	0	0.839521	0.188766	proteasome (prosome, macropain) subunit, beta type 8 (large multifunctional peptidase 7) [Source:MGI Symbol;Acc:MGI:1346527]
S100a11	0.732873	0	0.997	0.939	0	3.08259	2.24914	S100 calcium binding protein A11 [Source:MGI Symbol;Acc:MGI:1338798]
Tnfrsf9	0.732305	0	0.457	0.006	0	0.524594	0.00736115	tumor necrosis factor receptor superfamily, member 9 [Source:MGI Symbol;Acc:MGI:1101059]
Lrg1	0.726345	0	0.736	0.273	0	1.2687	0.469623	leucine-rich alpha-2-glycoprotein 1 [Source:MGI Symbol;Acc:MGI:1924155]
Ctsz	0.718228	0	0.842	0.393	0	1.34541	0.56866	cathepsin Z [Source:MGI Symbol;Acc:MGI:1891190]
Cyba	0.710535	0	0.872	0.527	0	1.54654	0.810164	cytochrome b-245, alpha polypeptide [Source:MGI Symbol;Acc:MGI:1316658]
Hmgn2	0.707202	0	0.599	0.192	0	0.836557	0.264788	high mobility group nucleosomal binding domain 2 [Source:MGI Symbol;Acc:MGI:96136]
Ptgs1	0.70101	0	0.682	0.178	0	0.901317	0.240988	prostaglandin-endoperoxide synthase 1 [Source:MGI Symbol;Acc:MGI:97797]
Rbm3	0.700328	0	0.838	0.397	0	1.33455	0.572625	RNA binding motif (RNP1, RRM) protein 3 [Source:MGI Symbol;Acc:MGI:1099460]
Tmem176a	0.696071	0	0.925	0.531	0	1.75292	0.856661	transmembrane protein 176A [Source:MGI Symbol;Acc:MGI:1913308]
Ly6a	0.694742	0	0.41	0.062	0	0.525175	0.083741	lymphocyte antigen 6 complex, locus A [Source:MGI Symbol;Acc:MGI:107527]
Cystm1	0.691055	0	0.957	0.67	0	1.9639	1.12269	cysteine-rich transmembrane module containing 1 [Source:MGI Symbol;Acc:MGI:1913310]
Bst2	0.65264	0	0.646	0.169	0	0.838707	0.233819	bone marrow stromal cell antigen 2 [Source:MGI Symbol;Acc:MGI:1916800]
Tspan8	0.648921	0	0.648	0.187	0	0.847791	0.252767	tetraspanin 8 [Source:MGI Symbol;Acc:MGI:2384918]
Dynlrb1	0.627862	0	0.941	0.654	0	1.80054	1.05295	dynein light chain roadblock-type 1 [Source:MGI Symbol;Acc:MGI:1914318]
Bcap29	0.626935	0	0.526	0.066	0	0.592377	0.0843857	B cell receptor associated protein 29 [Source:MGI Symbol;Acc:MGI:101917]
Cox5a	0.620462	0	0.928	0.592	0	1.69693	0.927398	cytochrome c oxidase subunit 5A [Source:MGI Symbol;Acc:MGI:88474]
Serpinb9	0.61235	0	0.532	0.159	0	0.687194	0.216754	serine (or cysteine) peptidase inhibitor, clade B, member 9 [Source:MGI Symbol;Acc:MGI:106603]
Cxcl17	0.605234	0	0.619	0.178	0	0.841675	0.269701	chemokine (C-X-C motif) ligand 17 [Source:MGI Symbol;Acc:MGI:2387642]
Taf10	0.602425	0	0.694	0.229	0	0.901788	0.304915	TATA-box binding protein associated factor 10 [Source:MGI Symbol;Acc:MGI:1346320]
Npc2	0.576174	0	1	0.992	0	4.33085	3.68365	NPC intracellular cholesterol transporter 2 [Source:MGI Symbol;Acc:MGI:1915213]
Sftpd	0.573508	0	0.999	0.974	0	4.19469	3.49449	surfactant associated protein D [Source:MGI Symbol;Acc:MGI:109515]
Psme2	0.572326	0	0.755	0.337	0	1.06334	0.46708	proteasome (prosome, macropain) activator subunit 2 (PA28 beta) [Source:MGI Symbol;Acc:MGI:1096365]
Psmb9	0.56779	0	0.425	0.045	0	0.470102	0.0548641	proteasome (prosome, macropain) subunit, beta type 9 (large multifunctional peptidase 2) [Source:MGI Symbol;Acc:MGI:1346526]
Calm1	0.559458	0	0.971	0.773	0	2.2814	1.49141	calmodulin 1 [Source:MGI Symbol;Acc:MGI:88251]
Cstb	0.557883	0	0.917	0.603	0	1.63855	0.957082	cystatin B [Source:MGI Symbol;Acc:MGI:109514]
Actg1	0.553997	0	0.993	0.929	0	2.82953	2.17397	actin, gamma, cytoplasmic 1 [Source:MGI Symbol;Acc:MGI:87906]
Krt8	0.549995	0	0.761	0.347	0	1.15979	0.546839	keratin 8 [Source:MGI Symbol;Acc:MGI:96705]
Cox5b	0.548044	0	0.96	0.711	0	1.93086	1.21308	cytochrome c oxidase subunit 5B [Source:MGI Symbol;Acc:MGI:88475]
Mif	0.545713	0	0.889	0.569	0	1.54804	0.89158	macrophage migration inhibitory factor (glycosylation-inhibiting factor) [Source:MGI Symbol;Acc:MGI:96982]
Anxa1	0.544354	0	0.573	0.176	0	0.770025	0.276552	annexin A1 [Source:MGI Symbol;Acc:MGI:96819]
Atp5g2	0.542616	0	0.957	0.728	0	1.93547	1.24316	ATP synthase, H+ transporting, mitochondrial F0 complex, subunit C2 (subunit 9) [Source:MGI Symbol;Acc:MGI:1915192]
Ckmt1	0.539731	0	0.457	0.069	0	0.506585	0.0863852	creatine kinase, mitochondrial 1, ubiquitous [Source:MGI Symbol;Acc:MGI:99441]
Sh3bgrl3	0.539588	0	0.845	0.479	0	1.34431	0.716752	SH3 domain binding glutamic acid-rich protein-like 3 [Source:MGI Symbol;Acc:MGI:1920973]
Ifi27	0.533412	0	0.809	0.411	0	1.2588	0.624838	interferon, alpha-inducible protein 27 [Source:MGI Symbol;Acc:MGI:1277180]
Tma7	0.530766	0	0.929	0.63	0	1.69457	1.02107	translational machinery associated 7 [Source:MGI Symbol;Acc:MGI:1913417]
Sox9	0.525887	0	0.303	0.001	0	0.335607	0.00107666	SRY (sex determining region Y)-box 9 [Source:MGI Symbol;Acc:MGI:98371]
Phgr1	0.522926	0	0.322	0.027	0	0.365402	0.0359636	proline/histidine/glycine-rich 1 [Source:MGI Symbol;Acc:MGI:1858382]
Rnaset2a	0.516335	0	0.848	0.471	0	1.32261	0.697999	ribonuclease T2A [Source:MGI Symbol;Acc:MGI:1915445]
Atp5c1	0.50846	0	0.836	0.455	0	1.27722	0.664475	ATP synthase, H+ transporting, mitochondrial F1 complex, gamma polypeptide 1 [Source:MGI Symbol;Acc:MGI:1261437]
Cox7a2	0.496299	0	0.986	0.896	0	2.43816	1.83499	cytochrome c oxidase subunit 7A2 [Source:MGI Symbol;Acc:MGI:1316715]
Tmsb4x	0.493598	0	1	1	0	5.1811	4.72214	thymosin, beta 4, X chromosome [Source:MGI Symbol;Acc:MGI:99510]
AU021092	0.492524	0	0.628	0.216	0	0.781807	0.292519	expressed sequence AU021092 [Source:MGI Symbol;Acc:MGI:2146559]
Me1	0.488736	0	0.608	0.196	0	0.728807	0.260284	malic enzyme 1, NADP(+)-dependent, cytosolic [Source:MGI Symbol;Acc:MGI:97043]
Uqcrq	0.473879	0	0.953	0.731	0	1.88532	1.25932	ubiquinol-cytochrome c reductase, complex III subunit VII [Source:MGI Symbol;Acc:MGI:107807]
Sec11c	0.471164	0	0.722	0.322	0	0.967564	0.449719	SEC11 homolog C, signal peptidase complex subunit [Source:MGI Symbol;Acc:MGI:1913536]
Cd14	0.462893	0	0.388	0.065	0	0.432437	0.0861402	CD14 antigen [Source:MGI Symbol;Acc:MGI:88318]
Mrpl17	0.461633	0	0.618	0.222	0	0.752135	0.294355	mitochondrial ribosomal protein L17 [Source:MGI Symbol;Acc:MGI:1351608]
Atp5o	0.459563	0	0.885	0.585	0	1.49889	0.914579	ATP synthase, H+ transporting, mitochondrial F1 complex, O subunit [Source:MGI Symbol;Acc:MGI:106341]
H2-Q6	0.444694	0	0.328	0.027	0	0.344563	0.0344911	histocompatibility 2, Q region locus 6 [Source:MGI Symbol;Acc:MGI:95935]
Myl6	0.439687	0	0.996	0.953	0	2.82367	2.27431	myosin, light polypeptide 6, alkali, smooth muscle and non-muscle [Source:MGI Symbol;Acc:MGI:109318]
Cd63	0.430833	0	0.977	0.885	0	2.3798	1.84351	CD63 antigen [Source:MGI Symbol;Acc:MGI:99529]
Ptges	0.426252	0	0.376	0.048	0	0.39066	0.0639586	prostaglandin E synthase [Source:MGI Symbol;Acc:MGI:1927593]
Metrnl	0.425749	0	0.361	0.044	0	0.371179	0.0556732	meteorin, glial cell differentiation regulator-like [Source:MGI Symbol;Acc:MGI:2384806]
Tmem176b	0.422847	0	0.931	0.66	0	1.77473	1.15018	transmembrane protein 176B [Source:MGI Symbol;Acc:MGI:1916348]
Cox8a	0.416304	0	0.997	0.972	0	2.86969	2.37601	cytochrome c oxidase subunit 8A [Source:MGI Symbol;Acc:MGI:105959]
Atp5h	0.408056	0	0.978	0.863	0	2.21404	1.673	ATP synthase, H+ transporting, mitochondrial F0 complex, subunit D [Source:MGI Symbol;Acc:MGI:1918929]
Gpx4	0.393818	0	0.986	0.927	0	2.56026	2.07319	glutathione peroxidase 4 [Source:MGI Symbol;Acc:MGI:104767]
Atox1	0.389099	0	0.97	0.829	0	2.09357	1.57257	antioxidant 1 copper chaperone [Source:MGI Symbol;Acc:MGI:1333855]
Atpif1	0.366321	0	0.968	0.802	0	2.05837	1.50979	ATPase inhibitory factor 1 [Source:MGI Symbol;Acc:MGI:1196457]
H3f3b	0.365061	0	0.999	0.985	0	3.10496	2.66606	H3 histone, family 3B [Source:MGI Symbol;Acc:MGI:1101768]
Ndufa4	0.361883	0	0.985	0.911	0	2.37178	1.90798	Ndufa4, mitochondrial complex associated [Source:MGI Symbol;Acc:MGI:107686]
Ppia	0.348835	0	0.998	0.985	0	3.1024	2.7098	peptidylprolyl isomerase A [Source:MGI Symbol;Acc:MGI:97749]
Cox7c	0.348002	0	0.985	0.905	0	2.35702	1.89079	cytochrome c oxidase subunit 7C [Source:MGI Symbol;Acc:MGI:103226]
Atp5l	0.347758	0	0.987	0.912	0	2.40729	1.93941	ATP synthase, H+ transporting, mitochondrial F0 complex, subunit G [Source:MGI Symbol;Acc:MGI:1351597]
Cox6b1	0.331811	0	0.984	0.923	0	2.39181	1.96384	cytochrome c oxidase, subunit 6B1 [Source:MGI Symbol;Acc:MGI:107460]
Cox6c	0.292177	0	0.995	0.972	0	2.78982	2.42139	cytochrome c oxidase subunit 6C [Source:MGI Symbol;Acc:MGI:104614]
Rpl37	-0.295991	0	0.997	0.999	0	3.13825	3.43762	ribosomal protein L37 [Source:MGI Symbol;Acc:MGI:1914531]
mt-Nd4	-0.381441	0	0.997	0.997	0	2.63711	3.04202	mitochondrially encoded NADH dehydrogenase 4 [Source:MGI Symbol;Acc:MGI:102498]
Rps29	-0.394089	0	1	0.999	0	3.38693	3.77578	ribosomal protein S29 [Source:MGI Symbol;Acc:MGI:107681]
Rps28	-0.461531	0	0.992	0.992	0	2.71788	3.16031	ribosomal protein S28 [Source:MGI Symbol;Acc:MGI:1859516]
Hspa8	-0.492918	0	0.922	0.934	0	1.6675	2.13902	heat shock protein 8 [Source:MGI Symbol;Acc:MGI:105384]
Rps27	-0.540553	0	0.997	1	0	3.27391	3.8156	ribosomal protein S27 [Source:MGI Symbol;Acc:MGI:1888676]
Sftpb	-0.554502	0	0.997	0.994	0	3.97906	4.50094	surfactant associated protein B [Source:MGI Symbol;Acc:MGI:109516]
mt-Nd2	-0.598033	0	0.962	0.971	0	1.8873	2.4934	mitochondrially encoded NADH dehydrogenase 2 [Source:MGI Symbol;Acc:MGI:102500]
Rpl10-ps3	-0.61266	0	0.867	0.911	0	1.37542	1.95999	ribosomal protein L10, pseudogene 3 [Source:MGI Symbol;Acc:MGI:3704336]
Prdx6	-0.633791	0	0.824	0.891	0	1.26216	1.86932	peroxiredoxin 6 [Source:MGI Symbol;Acc:MGI:894320]
Rps27rt	-0.645536	0	0.701	0.79	0	0.880415	1.4371	ribosomal protein S27, retrogene [Source:MGI Symbol;Acc:MGI:3704345]
Sftpc	-0.65938	0	1	1	0	6.61891	7.37076	surfactant associated protein C [Source:MGI Symbol;Acc:MGI:109517]
Malat1	-0.682423	0	1	1	0	5.17974	5.92812	metastasis associated lung adenocarcinoma transcript 1 (non-coding RNA) [Source:MGI Symbol;Acc:MGI:1919539]
Errfi1	-0.684698	0	0.73	0.811	0	1.04921	1.6625	ERBB receptor feedback inhibitor 1 [Source:MGI Symbol;Acc:MGI:1921405]
Selenbp1	-0.727264	0	0.611	0.749	0	0.757774	1.3786	selenium binding protein 1 [Source:MGI Symbol;Acc:MGI:96825]
Cat	-0.758324	0	0.366	0.588	0	0.375692	0.946188	catalase [Source:MGI Symbol;Acc:MGI:88271]
Lyz2	-0.798898	0	1	1	0	4.66787	5.58505	lysozyme 2 [Source:MGI Symbol;Acc:MGI:96897]
Igfbp6	-0.811715	0	0.072	0.342	0	0.0690605	0.517703	insulin-like growth factor binding protein 6 [Source:MGI Symbol;Acc:MGI:96441]
Rgcc	-0.878872	0	0.618	0.789	0	0.860123	1.63449	regulator of cell cycle [Source:MGI Symbol;Acc:MGI:1913464]
Lyz1	-1.10177	0	0.623	0.807	0	1.02617	1.90929	lysozyme 1 [Source:MGI Symbol;Acc:MGI:96902]
Rnase4	-1.16396	0	0.681	0.91	0	0.997014	2.18332	ribonuclease, RNase A family 4 [Source:MGI Symbol;Acc:MGI:1926217]
Apoe	-1.22986	0	0.551	0.802	0	0.734192	1.76063	apolipoprotein E [Source:MGI Symbol;Acc:MGI:88057]
Bex2	-1.28826	0	0.091	0.53	0	0.102282	0.979433	brain expressed X-linked 2 [Source:MGI Symbol;Acc:MGI:1338017]
Cbr2	-1.42448	0	0.821	0.98	0	1.57504	3.35061	carbonyl reductase 2 [Source:MGI Symbol;Acc:MGI:107200]
Xist	-2.42007	0	0.007	0.911	0	0.00997128	2.15482	inactive X specific transcripts [Source:MGI Symbol;Acc:MGI:98974]
Pdlim1	0.465528	5.27223e-308	0.616	0.227	9.9661e-304	0.768422	0.310728	PDZ and LIM domain 1 (elfin) [Source:MGI Symbol;Acc:MGI:1860611]
Cycs	0.482672	8.80241e-308	0.808	0.433	1.66392e-303	1.20458	0.634924	cytochrome c, somatic [Source:MGI Symbol;Acc:MGI:88578]
Fcer2a	0.363132	1.5754e-307	0.234	0.002	2.97797e-303	0.235125	0.00266738	Fc receptor, IgE, low affinity II, alpha polypeptide [Source:MGI Symbol;Acc:MGI:95497]
Npw	-0.704564	3.33208e-307	0.477	0.648	6.29864e-303	0.535405	1.09412	neuropeptide W [Source:MGI Symbol;Acc:MGI:2685781]
Rps21	-0.358779	5.30212e-306	0.982	0.982	1.00226e-301	2.27444	2.61138	ribosomal protein S21 [Source:MGI Symbol;Acc:MGI:1913731]
H2-Q4	0.420785	2.92835e-304	0.455	0.115	5.53546e-300	0.506199	0.152136	histocompatibility 2, Q region locus 4 [Source:MGI Symbol;Acc:MGI:95933]
St3gal4	0.369641	9.88909e-303	0.318	0.041	1.86934e-298	0.324296	0.053854	ST3 beta-galactoside alpha-2,3-sialyltransferase 4 [Source:MGI Symbol;Acc:MGI:1316743]
Rpl37a	-0.245941	2.09084e-302	1	0.999	3.95231e-298	3.45278	3.68822	ribosomal protein L37a [Source:MGI Symbol;Acc:MGI:98068]
Ilk	0.433491	4.27767e-302	0.487	0.138	8.08608e-298	0.565538	0.185471	integrin linked kinase [Source:MGI Symbol;Acc:MGI:1195267]
St3gal6	0.38991	3.26182e-301	0.419	0.094	6.16581e-297	0.444364	0.121993	ST3 beta-galactoside alpha-2,3-sialyltransferase 6 [Source:MGI Symbol;Acc:MGI:1888707]
Clip4	0.404511	4.59764e-301	0.438	0.105	8.69091e-297	0.476588	0.138987	CAP-GLY domain containing linker protein family, member 4 [Source:MGI Symbol;Acc:MGI:1919100]
Etfb	0.453271	1.44734e-299	0.897	0.625	2.7359e-295	1.58112	1.00524	electron transferring flavoprotein, beta polypeptide [Source:MGI Symbol;Acc:MGI:106098]
Shisa4	0.375159	2.80263e-298	0.303	0.035	5.2978e-294	0.309965	0.044852	shisa family member 4 [Source:MGI Symbol;Acc:MGI:1924802]
Pfdn1	0.436934	7.97162e-298	0.781	0.38	1.50687e-293	1.06635	0.539532	prefoldin 1 [Source:MGI Symbol;Acc:MGI:1914449]
Sepp1	-0.582413	8.91138e-298	0.7	0.78	1.68452e-293	0.938336	1.44958	NA
Rps2	0.34029	2.89551e-297	0.994	0.97	5.47338e-293	2.76359	2.36691	ribosomal protein S2 [Source:MGI Symbol;Acc:MGI:105110]
Rpl36	-0.30384	8.53325e-297	0.992	0.993	1.61304e-292	2.73788	3.0302	ribosomal protein L36 [Source:MGI Symbol;Acc:MGI:1860603]
Slc5a1	0.349084	4.49685e-296	0.252	0.013	8.50039e-292	0.24885	0.0157602	solute carrier family 5 (sodium/glucose cotransporter), member 1 [Source:MGI Symbol;Acc:MGI:107678]
Atp5j2	0.34379	4.49144e-294	0.978	0.885	8.49018e-290	2.23752	1.77897	ATP synthase, H+ transporting, mitochondrial F0 complex, subunit F2 [Source:MGI Symbol;Acc:MGI:1927558]
Ngfrap1	0.462572	8.38958e-292	0.815	0.442	1.58588e-287	1.21484	0.655699	NA
Mapk13	0.379334	1.50111e-291	0.429	0.105	2.83755e-287	0.453437	0.133028	mitogen-activated protein kinase 13 [Source:MGI Symbol;Acc:MGI:1346864]
Ndufb5	0.423404	2.3595e-291	0.882	0.565	4.46016e-287	1.42956	0.870442	NADH:ubiquinone oxidoreductase subunit B5 [Source:MGI Symbol;Acc:MGI:1913296]
Uqcr10	0.362472	6.06435e-291	0.97	0.834	1.14634e-286	2.08407	1.58439	ubiquinol-cytochrome c reductase, complex III subunit X [Source:MGI Symbol;Acc:MGI:1913402]
Mrpl33	0.441677	4.77311e-288	0.845	0.487	9.02262e-284	1.29622	0.735461	mitochondrial ribosomal protein L33 [Source:MGI Symbol;Acc:MGI:2137225]
Clic1	0.474365	2.3989e-287	0.827	0.468	4.53464e-283	1.27594	0.706392	chloride intracellular channel 1 [Source:MGI Symbol;Acc:MGI:2148924]
Ybx1	0.4501	2.85372e-287	0.863	0.541	5.39439e-283	1.41767	0.842986	Y box protein 1 [Source:MGI Symbol;Acc:MGI:99146]
Akr1b8	0.348314	7.61066e-287	0.314	0.044	1.43864e-282	0.313575	0.056027	aldo-keto reductase family 1, member B8 [Source:MGI Symbol;Acc:MGI:107673]
Ptpn18	0.384611	8.08618e-287	0.406	0.094	1.52853e-282	0.43065	0.11954	protein tyrosine phosphatase, non-receptor type 18 [Source:MGI Symbol;Acc:MGI:108410]
Fdx1	0.47655	6.67518e-285	0.775	0.402	1.26181e-280	1.11177	0.576771	ferredoxin 1 [Source:MGI Symbol;Acc:MGI:103224]
Pigr	0.422646	2.3678e-283	0.253	0.018	4.47586e-279	0.282152	0.021845	polymeric immunoglobulin receptor [Source:MGI Symbol;Acc:MGI:103080]
Ces1d	-0.688229	4.44771e-283	0.424	0.611	8.40751e-279	0.475896	1.01342	carboxylesterase 1D [Source:MGI Symbol;Acc:MGI:2148202]
Atp5b	0.437338	8.33083e-282	0.887	0.601	1.57478e-277	1.53085	0.963905	ATP synthase, H+ transporting mitochondrial F1 complex, beta subunit [Source:MGI Symbol;Acc:MGI:107801]
Ndufc2	0.375241	1.07954e-279	0.949	0.746	2.04066e-275	1.84278	1.31164	NADH:ubiquinone oxidoreductase subunit C2 [Source:MGI Symbol;Acc:MGI:1344370]
Snx7	0.390316	1.66233e-277	0.533	0.175	3.1423e-273	0.604757	0.231528	sorting nexin 7 [Source:MGI Symbol;Acc:MGI:1923811]
Prdx1	0.326269	1.25538e-276	0.988	0.936	2.37304e-272	2.57081	2.14629	peroxiredoxin 1 [Source:MGI Symbol;Acc:MGI:99523]
Itm2a	0.407476	1.86063e-276	0.275	0.03	3.51716e-272	0.304144	0.0385902	integral membrane protein 2A [Source:MGI Symbol;Acc:MGI:107706]
Ndufa2	0.332027	4.87646e-276	0.977	0.875	9.21797e-272	2.16731	1.7166	NADH:ubiquinone oxidoreductase subunit A2 [Source:MGI Symbol;Acc:MGI:1343103]
Areg	0.644962	4.86544e-275	0.404	0.105	9.19715e-271	0.592848	0.165968	amphiregulin [Source:MGI Symbol;Acc:MGI:88068]
Nme1	0.420339	3.47751e-273	0.67	0.29	6.57355e-269	0.852607	0.397677	NME/NM23 nucleoside diphosphate kinase 1 [Source:MGI Symbol;Acc:MGI:97355]
Dynlt3	0.388077	6.79077e-272	0.639	0.251	1.28366e-267	0.764977	0.34337	dynein light chain Tctex-type 3 [Source:MGI Symbol;Acc:MGI:1914367]
Nsmce1	0.365178	2.30248e-269	0.471	0.137	4.35237e-265	0.511936	0.18069	NSE1 homolog, SMC5-SMC6 complex component [Source:MGI Symbol;Acc:MGI:1914961]
Pon1	-0.571947	8.05734e-269	0.027	0.227	1.52308e-264	0.022121	0.332045	paraoxonase 1 [Source:MGI Symbol;Acc:MGI:103295]
Rpl34	-0.284337	1.53667e-265	0.992	0.992	2.90477e-261	2.65792	2.92292	ribosomal protein L34 [Source:MGI Symbol;Acc:MGI:1915686]
Corin	0.316297	3.67372e-264	0.203	0.001	6.94443e-260	0.201287	0.00178172	corin, serine peptidase [Source:MGI Symbol;Acc:MGI:1349451]
Krt7	0.541961	1.52531e-263	0.564	0.214	2.88329e-259	0.751991	0.306602	keratin 7 [Source:MGI Symbol;Acc:MGI:96704]
Mgp	-1.63206	6.88135e-263	0.133	0.37	1.30078e-258	0.146898	0.760108	matrix Gla protein [Source:MGI Symbol;Acc:MGI:96976]
Hibadh	0.390625	1.46649e-262	0.547	0.195	2.77211e-258	0.631212	0.255881	3-hydroxyisobutyrate dehydrogenase [Source:MGI Symbol;Acc:MGI:1889802]
Ndufb9	0.388859	5.42596e-260	0.892	0.596	1.02567e-255	1.46935	0.937236	NADH:ubiquinone oxidoreductase subunit B9 [Source:MGI Symbol;Acc:MGI:1913468]
Snhg18	0.430113	5.8228e-260	0.606	0.244	1.10068e-255	0.789649	0.35325	small nucleolar RNA host gene 18 [Source:MGI Symbol;Acc:MGI:1914085]
Mia	0.395277	5.82465e-260	0.384	0.093	1.10103e-255	0.419794	0.119027	melanoma inhibitory activity [Source:MGI Symbol;Acc:MGI:109615]
Tagln2	0.387314	1.88196e-258	0.951	0.766	3.55746e-254	1.95113	1.41078	transgelin 2 [Source:MGI Symbol;Acc:MGI:1312985]
Gstm1	-0.883519	2.55222e-257	0.168	0.406	4.82447e-253	0.17798	0.683007	glutathione S-transferase, mu 1 [Source:MGI Symbol;Acc:MGI:95860]
Gm26917	0.379544	5.6523e-257	0.476	0.149	1.06845e-252	0.521105	0.190718	predicted gene, 26917 [Source:MGI Symbol;Acc:MGI:5504032]
Guca2a	0.339811	6.85167e-255	0.199	0.003	1.29517e-250	0.208405	0.00293724	guanylate cyclase activator 2a (guanylin) [Source:MGI Symbol;Acc:MGI:102738]
Timm10b	0.42147	2.80069e-254	0.771	0.399	5.29414e-250	1.07138	0.57372	translocase of inner mitochondrial membrane 10B [Source:MGI Symbol;Acc:MGI:1315196]
Prdx3	0.355453	4.6281e-254	0.508	0.168	8.7485e-250	0.554299	0.217084	peroxiredoxin 3 [Source:MGI Symbol;Acc:MGI:88034]
Minos1	0.35211	4.41917e-253	0.945	0.718	8.35356e-249	1.74094	1.22584	NA
Cd44	0.452682	3.92805e-251	0.493	0.166	7.42519e-247	0.590019	0.222486	CD44 antigen [Source:MGI Symbol;Acc:MGI:88338]
Tacstd2	0.337612	2.21046e-250	0.332	0.067	4.17843e-246	0.34939	0.0883288	tumor-associated calcium signal transducer 2 [Source:MGI Symbol;Acc:MGI:1861606]
mt-Cytb	-0.249233	3.09364e-249	0.999	1	5.8479e-245	3.40135	3.67928	mitochondrially encoded cytochrome b [Source:MGI Symbol;Acc:MGI:102501]
Rnaset2b	0.404708	4.7816e-249	0.774	0.406	9.03865e-245	1.06769	0.580413	ribonuclease T2B [Source:MGI Symbol;Acc:MGI:3702087]
Slc6a20a	0.321513	2.02017e-248	0.274	0.037	3.81873e-244	0.274988	0.0473308	solute carrier family 6 (neurotransmitter transporter), member 20A [Source:MGI Symbol;Acc:MGI:2143217]
Atp5g3	0.398273	3.02402e-246	0.827	0.478	5.71631e-242	1.22584	0.713786	ATP synthase, H+ transporting, mitochondrial F0 complex, subunit C3 (subunit 9) [Source:MGI Symbol;Acc:MGI:2442035]
mt-Co3	-0.237536	1.67159e-245	1	1	3.15981e-241	3.86713	4.1394	mitochondrially encoded cytochrome c oxidase III [Source:MGI Symbol;Acc:MGI:102502]
H1f0	0.482723	3.82974e-245	0.644	0.289	7.23937e-241	0.886769	0.421535	H1 histone family, member 0 [Source:MGI Symbol;Acc:MGI:95893]
Gstt2	0.330795	2.25572e-244	0.412	0.113	4.26399e-240	0.42592	0.142641	glutathione S-transferase, theta 2 [Source:MGI Symbol;Acc:MGI:106188]
Ppic	0.421894	5.51036e-244	0.794	0.441	1.04162e-239	1.16025	0.652376	peptidylprolyl isomerase C [Source:MGI Symbol;Acc:MGI:97751]
Hmgb2	0.666093	5.68093e-244	0.705	0.367	1.07387e-239	1.09972	0.5429	high mobility group box 2 [Source:MGI Symbol;Acc:MGI:96157]
Acsl4	0.424027	8.10894e-244	0.829	0.495	1.53283e-239	1.28481	0.758802	acyl-CoA synthetase long-chain family member 4 [Source:MGI Symbol;Acc:MGI:1354713]
Vmp1	0.380817	8.56305e-244	0.622	0.254	1.61867e-239	0.744168	0.346017	vacuole membrane protein 1 [Source:MGI Symbol;Acc:MGI:1923159]
Tmem30a	0.398052	1.06213e-243	0.753	0.377	2.00775e-239	1.01727	0.541072	transmembrane protein 30A [Source:MGI Symbol;Acc:MGI:106402]
Apobec3	0.329806	3.85362e-243	0.37	0.09	7.28449e-239	0.385393	0.115506	apolipoprotein B mRNA editing enzyme, catalytic polypeptide 3 [Source:MGI Symbol;Acc:MGI:1933111]
Gpx1	0.385159	3.3923e-242	0.934	0.727	6.41247e-238	1.8026	1.28026	glutathione peroxidase 1 [Source:MGI Symbol;Acc:MGI:104887]
Arg2	0.333167	6.45486e-242	0.352	0.081	1.22016e-237	0.36537	0.102724	arginase type II [Source:MGI Symbol;Acc:MGI:1330806]
Tpp1	0.373906	9.79031e-242	0.528	0.191	1.85066e-237	0.606786	0.25307	tripeptidyl peptidase I [Source:MGI Symbol;Acc:MGI:1336194]
Ndufb6	0.388609	1.73678e-241	0.766	0.398	3.28303e-237	1.03203	0.560962	NADH:ubiquinone oxidoreductase subunit B6 [Source:MGI Symbol;Acc:MGI:2684983]
Cks2	0.514494	1.48909e-240	0.269	0.04	2.81482e-236	0.350245	0.0593507	CDC28 protein kinase regulatory subunit 2 [Source:MGI Symbol;Acc:MGI:1913447]
Coq7	0.320648	2.81126e-240	0.433	0.126	5.31412e-236	0.453828	0.16378	demethyl-Q 7 [Source:MGI Symbol;Acc:MGI:107207]
Avpi1	0.379105	3.35064e-240	0.883	0.571	6.33372e-236	1.41765	0.896139	arginine vasopressin-induced 1 [Source:MGI Symbol;Acc:MGI:1916784]
Rgs10	0.404836	1.31522e-239	0.528	0.194	2.48617e-235	0.628037	0.261131	regulator of G-protein signalling 10 [Source:MGI Symbol;Acc:MGI:1915115]
Ucp2	0.379302	6.29011e-239	0.719	0.339	1.18902e-234	0.93785	0.486043	uncoupling protein 2 (mitochondrial, proton carrier) [Source:MGI Symbol;Acc:MGI:109354]
Krt18	0.478099	9.98864e-239	0.78	0.424	1.88815e-234	1.21794	0.673872	keratin 18 [Source:MGI Symbol;Acc:MGI:96692]
Sod2	0.407925	1.49814e-238	0.724	0.361	2.83193e-234	0.982255	0.51641	superoxide dismutase 2, mitochondrial [Source:MGI Symbol;Acc:MGI:98352]
Hspb1	-0.737284	1.7846e-238	0.421	0.611	3.37343e-234	0.540395	1.108	heat shock protein 1 [Source:MGI Symbol;Acc:MGI:96240]
Uqcrb	0.336693	2.22339e-238	0.959	0.796	4.20287e-234	1.91129	1.43828	ubiquinol-cytochrome c reductase binding protein [Source:MGI Symbol;Acc:MGI:1914780]
Slc25a4	0.361748	4.19668e-238	0.709	0.335	7.93298e-234	0.933489	0.48522	solute carrier family 25 (mitochondrial carrier, adenine nucleotide translocator), member 4 [Source:MGI Symbol;Acc:MGI:1353495]
Uqcr11	0.293176	8.70379e-237	0.984	0.907	1.64528e-232	2.30856	1.90299	ubiquinol-cytochrome c reductase, complex III subunit XI [Source:MGI Symbol;Acc:MGI:1913844]
Psma4	0.361742	6.75046e-236	0.588	0.236	1.27604e-231	0.696843	0.318451	proteasome (prosome, macropain) subunit, alpha type 4 [Source:MGI Symbol;Acc:MGI:1347060]
Psme1	0.385733	8.66365e-235	0.83	0.495	1.63769e-230	1.24807	0.745149	proteasome (prosome, macropain) activator subunit 1 (PA28 alpha) [Source:MGI Symbol;Acc:MGI:1096367]
Ccnd1	0.380928	1.40317e-234	0.516	0.187	2.65242e-230	0.609233	0.255283	cyclin D1 [Source:MGI Symbol;Acc:MGI:88313]
Fuom	0.333979	3.08486e-234	0.391	0.107	5.8313e-230	0.413383	0.135487	fucose mutarotase [Source:MGI Symbol;Acc:MGI:1916314]
Glrx	0.361799	1.28494e-233	0.585	0.232	2.42891e-229	0.696497	0.319367	glutaredoxin [Source:MGI Symbol;Acc:MGI:2135625]
Trappc1	0.317185	9.61046e-233	0.48	0.156	1.81666e-228	0.511953	0.206325	trafficking protein particle complex 1 [Source:MGI Symbol;Acc:MGI:1098727]
Psmb1	0.384789	2.31369e-232	0.844	0.525	4.37357e-228	1.28818	0.789801	proteasome (prosome, macropain) subunit, beta type 1 [Source:MGI Symbol;Acc:MGI:104884]
Fam96a	0.336079	1.39292e-231	0.492	0.168	2.63305e-227	0.537673	0.218932	NA
Sdhb	0.353762	1.18175e-229	0.641	0.276	2.23386e-225	0.76695	0.374128	succinate dehydrogenase complex, subunit B, iron sulfur (Ip) [Source:MGI Symbol;Acc:MGI:1914930]
Cfl1	0.388147	2.07029e-228	0.886	0.601	3.91346e-224	1.495	0.973327	cofilin 1, non-muscle [Source:MGI Symbol;Acc:MGI:101757]
Hsd17b10	0.404894	1.2189e-226	0.77	0.434	2.30409e-222	1.1159	0.635469	hydroxysteroid (17-beta) dehydrogenase 10 [Source:MGI Symbol;Acc:MGI:1333871]
Atp5e	0.2821	1.23466e-225	0.985	0.929	2.33387e-221	2.46093	2.08242	ATP synthase, H+ transporting, mitochondrial F1 complex, epsilon subunit [Source:MGI Symbol;Acc:MGI:1855697]
Chil4	0.9117	3.73724e-224	0.172	0	7.06451e-220	0.215651	0.000520996	chitinase-like 4 [Source:MGI Symbol;Acc:MGI:1341098]
Rpl21	-0.217391	3.22067e-223	0.999	0.999	6.08802e-219	3.43132	3.63073	ribosomal protein L21 [Source:MGI Symbol;Acc:MGI:1278340]
Psma3	0.369441	6.50478e-223	0.767	0.41	1.2296e-218	1.04869	0.588782	proteasome (prosome, macropain) subunit, alpha type 3 [Source:MGI Symbol;Acc:MGI:104883]
Eif2s3y	0.242506	7.91575e-220	0.168	0	1.49631e-215	0.156509	0	eukaryotic translation initiation factor 2, subunit 3, structural gene Y-linked [Source:MGI Symbol;Acc:MGI:1349430]
Ndufab1	0.361839	5.81793e-219	0.812	0.468	1.09976e-214	1.16469	0.689725	NADH:ubiquinone oxidoreductase subunit AB1 [Source:MGI Symbol;Acc:MGI:1917566]
Rpl10	-0.215462	5.8758e-219	0.999	0.999	1.1107e-214	3.39733	3.60982	ribosomal protein L10 [Source:MGI Symbol;Acc:MGI:105943]
Elf5	0.293103	1.53915e-218	0.336	0.081	2.90946e-214	0.33829	0.102055	E74-like factor 5 [Source:MGI Symbol;Acc:MGI:1335079]
S100a1	0.379187	1.28114e-215	0.897	0.627	2.42174e-211	1.57697	1.05174	S100 calcium binding protein A1 [Source:MGI Symbol;Acc:MGI:1338917]
Nme7	0.272111	2.28669e-215	0.236	0.03	4.32254e-211	0.23044	0.0392072	NME/NM23 family member 7 [Source:MGI Symbol;Acc:MGI:2449121]
Cybrd1	0.257327	4.04975e-215	0.196	0.013	7.65524e-211	0.186344	0.0155953	cytochrome b reductase 1 [Source:MGI Symbol;Acc:MGI:2654575]
Ldha	0.377523	8.73024e-215	0.871	0.578	1.65028e-210	1.43473	0.926779	lactate dehydrogenase A [Source:MGI Symbol;Acc:MGI:96759]
Ndufv2	0.338291	9.00915e-214	0.653	0.297	1.703e-209	0.79439	0.406062	NADH:ubiquinone oxidoreductase core subunit V2 [Source:MGI Symbol;Acc:MGI:1920150]
Azin1	0.342269	2.88875e-212	0.584	0.244	5.46061e-208	0.695692	0.33608	antizyme inhibitor 1 [Source:MGI Symbol;Acc:MGI:1859169]
Lgals3	0.294519	1.35825e-211	0.527	0.199	2.56749e-207	0.63975	0.305096	lectin, galactose binding, soluble 3 [Source:MGI Symbol;Acc:MGI:96778]
Dnajc15	0.312407	8.2198e-211	0.545	0.211	1.55379e-206	0.614193	0.286538	DnaJ heat shock protein family (Hsp40) member C15 [Source:MGI Symbol;Acc:MGI:1913398]
Mgst3	0.3218	1.30782e-209	0.545	0.215	2.47218e-205	0.631336	0.296492	microsomal glutathione S-transferase 3 [Source:MGI Symbol;Acc:MGI:1913697]
Tpm1	0.358147	3.91729e-209	0.853	0.53	7.40485e-205	1.33779	0.838324	tropomyosin 1, alpha [Source:MGI Symbol;Acc:MGI:98809]
Cks1b	0.437776	1.46192e-208	0.263	0.049	2.76347e-204	0.333857	0.0698591	CDC28 protein kinase 1b [Source:MGI Symbol;Acc:MGI:1889208]
mt-Co1	-0.226698	1.4653e-208	1	1	2.76986e-204	3.99413	4.25522	mitochondrially encoded cytochrome c oxidase I [Source:MGI Symbol;Acc:MGI:102504]
Rpl14	-0.257622	1.96969e-207	0.992	0.993	3.7233e-203	2.66569	2.90575	ribosomal protein L14 [Source:MGI Symbol;Acc:MGI:1914365]
Rpsa	0.31697	2.72532e-207	0.977	0.892	5.15167e-203	2.26748	1.85123	ribosomal protein SA [Source:MGI Symbol;Acc:MGI:105381]
Ccl20	1.11742	3.39613e-207	0.163	0.002	6.41971e-203	0.264751	0.00284275	chemokine (C-C motif) ligand 20 [Source:MGI Symbol;Acc:MGI:1329031]
mt-Nd4l	-0.592258	3.03525e-206	0.354	0.522	5.73753e-202	0.366762	0.798665	mitochondrially encoded NADH dehydrogenase 4L [Source:MGI Symbol;Acc:MGI:102497]
Ube2l3	0.316932	5.06662e-206	0.59	0.247	9.57744e-202	0.677325	0.331741	ubiquitin-conjugating enzyme E2L 3 [Source:MGI Symbol;Acc:MGI:109240]
Atp5j	0.292829	6.23949e-206	0.968	0.827	1.17945e-201	1.98389	1.55154	ATP synthase, H+ transporting, mitochondrial F0 complex, subunit F [Source:MGI Symbol;Acc:MGI:107777]
Arpc1b	0.3502	7.74192e-206	0.709	0.353	1.46346e-201	0.9116	0.496779	actin related protein 2/3 complex, subunit 1B [Source:MGI Symbol;Acc:MGI:1343142]
Tmprss4	0.27855	2.62372e-205	0.41	0.127	4.95963e-201	0.42568	0.168387	transmembrane protease, serine 4 [Source:MGI Symbol;Acc:MGI:2384877]
Rps27l	0.356119	4.44533e-205	0.949	0.776	8.403e-201	1.88254	1.40806	ribosomal protein S27-like [Source:MGI Symbol;Acc:MGI:1915191]
Jun	-0.777959	5.19247e-205	0.504	0.615	9.81532e-201	0.590071	1.10844	jun proto-oncogene [Source:MGI Symbol;Acc:MGI:96646]
Polr1c	0.316459	1.25174e-204	0.581	0.243	2.36616e-200	0.671087	0.328357	polymerase (RNA) I polypeptide C [Source:MGI Symbol;Acc:MGI:103288]
Smdt1	0.316985	1.80754e-204	0.927	0.692	3.41678e-200	1.62149	1.1526	single-pass membrane protein with aspartate rich tail 1 [Source:MGI Symbol;Acc:MGI:1916279]
Lap3	0.274073	5.23297e-204	0.336	0.086	9.89187e-200	0.335424	0.109449	leucine aminopeptidase 3 [Source:MGI Symbol;Acc:MGI:1914238]
1110008P14Rik	0.333707	5.33959e-203	0.718	0.364	1.00934e-198	0.932012	0.516984	RIKEN cDNA 1110008P14 gene [Source:MGI Symbol;Acc:MGI:1920987]
Cox7b	0.332439	8.68703e-203	0.919	0.708	1.64211e-198	1.66367	1.19814	cytochrome c oxidase subunit 7B [Source:MGI Symbol;Acc:MGI:1913392]
Ramp1	-0.573505	1.24034e-202	0.468	0.601	2.34461e-198	0.53055	0.971551	receptor (calcitonin) activity modifying protein 1 [Source:MGI Symbol;Acc:MGI:1858418]
Tpm4	0.353284	1.29645e-201	0.727	0.379	2.45067e-197	1.00306	0.564363	tropomyosin 4 [Source:MGI Symbol;Acc:MGI:2449202]
Cyc1	0.310726	3.85149e-201	0.608	0.267	7.28046e-197	0.716411	0.362677	cytochrome c-1 [Source:MGI Symbol;Acc:MGI:1913695]
Kcnmb2	0.254368	3.99502e-201	0.232	0.033	7.55178e-197	0.229169	0.0451896	potassium large conductance calcium-activated channel, subfamily M, beta member 2 [Source:MGI Symbol;Acc:MGI:1919663]
Bhlhe40	0.313114	1.01055e-200	0.378	0.114	1.91024e-196	0.406604	0.149917	basic helix-loop-helix family, member e40 [Source:MGI Symbol;Acc:MGI:1097714]
Kcnj15	0.372549	1.33611e-200	0.74	0.402	2.52564e-196	1.04654	0.598062	potassium inwardly-rectifying channel, subfamily J, member 15 [Source:MGI Symbol;Acc:MGI:1310000]
Fosb	-0.516927	2.98668e-199	0.036	0.205	5.64571e-195	0.0363166	0.304308	FBJ osteosarcoma oncogene B [Source:MGI Symbol;Acc:MGI:95575]
Pcx	0.27548	4.17124e-199	0.273	0.056	7.88489e-195	0.271327	0.0689271	pyruvate carboxylase [Source:MGI Symbol;Acc:MGI:97520]
Hemk1	0.256652	1.40052e-198	0.243	0.039	2.64741e-194	0.235707	0.0501083	HemK methyltransferase family member 1 [Source:MGI Symbol;Acc:MGI:1916786]
Il4i1	0.363824	5.6653e-198	0.156	0.001	1.07091e-193	0.182943	0.00185981	interleukin 4 induced 1 [Source:MGI Symbol;Acc:MGI:109552]
Col14a1	0.289801	5.61678e-196	0.163	0.005	1.06174e-191	0.174548	0.00628561	collagen, type XIV, alpha 1 [Source:MGI Symbol;Acc:MGI:1341272]
Psmb10	0.294031	5.92874e-196	0.351	0.099	1.12071e-191	0.365603	0.128247	proteasome (prosome, macropain) subunit, beta type 10 [Source:MGI Symbol;Acc:MGI:1096380]
Mdh2	0.333253	8.21209e-196	0.699	0.354	1.55233e-191	0.901604	0.49781	malate dehydrogenase 2, NAD (mitochondrial) [Source:MGI Symbol;Acc:MGI:97050]
Ceacam1	0.282269	3.29865e-195	0.269	0.055	6.23545e-191	0.270761	0.0680683	carcinoembryonic antigen-related cell adhesion molecule 1 [Source:MGI Symbol;Acc:MGI:1347245]
Ndufs4	0.308078	6.93229e-195	0.599	0.261	1.31041e-190	0.693443	0.351449	NADH:ubiquinone oxidoreductase core subunit S4 [Source:MGI Symbol;Acc:MGI:1343135]
Pmepa1	0.249521	1.02391e-193	0.311	0.075	1.93551e-189	0.32261	0.109773	prostate transmembrane protein, androgen induced 1 [Source:MGI Symbol;Acc:MGI:1929600]
Cish	0.253328	5.0784e-193	0.233	0.037	9.5997e-189	0.228621	0.0475054	cytokine inducible SH2-containing protein [Source:MGI Symbol;Acc:MGI:103159]
Hmgb3	0.27027	5.72319e-192	0.357	0.103	1.08186e-187	0.365431	0.134052	high mobility group box 3 [Source:MGI Symbol;Acc:MGI:1098219]
Ddx3y	0.220277	2.10428e-191	0.148	0	3.97771e-187	0.138583	0	DEAD (Asp-Glu-Ala-Asp) box polypeptide 3, Y-linked [Source:MGI Symbol;Acc:MGI:1349406]
Psma6	0.304246	2.7069e-191	0.553	0.231	5.11685e-187	0.624252	0.305291	proteasome (prosome, macropain) subunit, alpha type 6 [Source:MGI Symbol;Acc:MGI:1347006]
Pcbd1	0.300184	5.84546e-191	0.515	0.204	1.10497e-186	0.581597	0.275151	pterin 4 alpha carbinolamine dehydratase/dimerization cofactor of hepatocyte nuclear factor 1 alpha (TCF1) 1 [Source:MGI Symbol;Acc:MGI:94873]
Fos	-0.882435	6.66729e-191	0.423	0.573	1.26032e-186	0.532545	1.10031	FBJ osteosarcoma oncogene [Source:MGI Symbol;Acc:MGI:95574]
Atp5g1	0.332982	8.83579e-191	0.883	0.603	1.67023e-186	1.42754	0.959365	ATP synthase, H+ transporting, mitochondrial F0 complex, subunit C1 (subunit 9) [Source:MGI Symbol;Acc:MGI:107653]
Birc5	0.406948	2.01963e-189	0.184	0.015	3.8177e-185	0.241236	0.0257985	baculoviral IAP repeat-containing 5 [Source:MGI Symbol;Acc:MGI:1203517]
Rras	0.255636	1.15416e-188	0.305	0.075	2.18171e-184	0.302998	0.0974618	related RAS viral (r-ras) oncogene [Source:MGI Symbol;Acc:MGI:98179]
Txnip	0.306563	1.62081e-188	0.592	0.26	3.06382e-184	0.743251	0.388728	thioredoxin interacting protein [Source:MGI Symbol;Acc:MGI:1889549]
Uqcrfs1	0.306717	4.10673e-188	0.625	0.286	7.76294e-184	0.73528	0.3849	ubiquinol-cytochrome c reductase, Rieske iron-sulfur polypeptide 1 [Source:MGI Symbol;Acc:MGI:1913944]
Mrpl11	0.239626	5.87467e-188	0.306	0.076	1.11049e-183	0.295232	0.0965223	mitochondrial ribosomal protein L11 [Source:MGI Symbol;Acc:MGI:2137215]
Pbld2	0.225148	6.71085e-188	0.198	0.022	1.26855e-183	0.188229	0.0287832	phenazine biosynthesis-like protein domain containing 2 [Source:MGI Symbol;Acc:MGI:1914557]
Anxa3	0.370208	6.9496e-187	0.758	0.423	1.31368e-182	1.08236	0.636967	annexin A3 [Source:MGI Symbol;Acc:MGI:1201378]
Tspan1	0.276334	1.75975e-186	0.419	0.146	3.32645e-182	0.47165	0.204327	tetraspanin 1 [Source:MGI Symbol;Acc:MGI:1914055]
Psma7	0.342924	6.43605e-186	0.79	0.463	1.21661e-181	1.12834	0.687537	proteasome (prosome, macropain) subunit, alpha type 7 [Source:MGI Symbol;Acc:MGI:1347070]
Sp3os	0.28395	1.87124e-185	0.472	0.178	3.53721e-181	0.519217	0.239259	trans-acting transcription factor 3, opposite strand [Source:MGI Symbol;Acc:MGI:1914936]
Lockd	0.385389	1.87262e-185	0.191	0.02	3.53982e-181	0.251181	0.0342006	lncRNA downstream of Cdkn1b [Source:MGI Symbol;Acc:MGI:1915081]
Emp2	0.350986	8.98608e-185	0.731	0.401	1.69864e-180	1.01353	0.590322	epithelial membrane protein 2 [Source:MGI Symbol;Acc:MGI:1098726]
Arpc2	0.350476	2.38202e-184	0.743	0.412	4.50273e-180	1.02494	0.599457	actin related protein 2/3 complex, subunit 2 [Source:MGI Symbol;Acc:MGI:1923959]
P4hb	0.33018	5.31299e-184	0.716	0.374	1.00431e-179	0.941807	0.537759	prolyl 4-hydroxylase, beta polypeptide [Source:MGI Symbol;Acc:MGI:97464]
Uqcrh	0.259197	2.20379e-183	0.976	0.889	4.16582e-179	2.15877	1.78646	ubiquinol-cytochrome c reductase hinge protein [Source:MGI Symbol;Acc:MGI:1913826]
Commd3	0.254941	3.25291e-183	0.435	0.153	6.14897e-179	0.453468	0.201991	COMM domain containing 3 [Source:MGI Symbol;Acc:MGI:88218]
Psmb2	0.330798	3.77433e-183	0.713	0.373	7.13461e-179	0.922179	0.52333	proteasome (prosome, macropain) subunit, beta type 2 [Source:MGI Symbol;Acc:MGI:1347045]
Acoxl	-0.543662	4.20073e-183	0.128	0.317	7.94064e-179	0.127427	0.461076	acyl-Coenzyme A oxidase-like [Source:MGI Symbol;Acc:MGI:1921371]
Ndufa12	0.326058	7.38239e-183	0.829	0.521	1.39549e-178	1.22681	0.783453	NADH:ubiquinone oxidoreductase subunit A12 [Source:MGI Symbol;Acc:MGI:1913664]
Lpp	0.261127	3.6904e-182	0.406	0.136	6.97596e-178	0.425306	0.181313	LIM domain containing preferred translocation partner in lipoma [Source:MGI Symbol;Acc:MGI:2441849]
Mrpl42	0.302928	7.84956e-182	0.623	0.29	1.4838e-177	0.747492	0.398427	mitochondrial ribosomal protein L42 [Source:MGI Symbol;Acc:MGI:1333774]
Gfer	0.244718	1.05635e-181	0.311	0.082	1.99681e-177	0.307109	0.105458	growth factor, augmenter of liver regeneration [Source:MGI Symbol;Acc:MGI:107757]
Slc25a3	0.315926	7.06245e-181	0.87	0.59	1.33502e-176	1.38683	0.933211	solute carrier family 25 (mitochondrial carrier, phosphate carrier), member 3 [Source:MGI Symbol;Acc:MGI:1353498]
Psmb4	0.329869	1.21218e-180	0.703	0.366	2.29138e-176	0.909025	0.515367	proteasome (prosome, macropain) subunit, beta type 4 [Source:MGI Symbol;Acc:MGI:1098257]
Ndufs6	0.321506	1.68309e-180	0.878	0.609	3.18155e-176	1.40129	0.954373	NADH:ubiquinone oxidoreductase core subunit S6 [Source:MGI Symbol;Acc:MGI:107932]
Hdc	0.354035	1.78745e-180	0.494	0.207	3.37882e-176	0.64939	0.313182	histidine decarboxylase [Source:MGI Symbol;Acc:MGI:96062]
Gng12	0.266642	4.7095e-180	0.422	0.148	8.90238e-176	0.44374	0.193955	guanine nucleotide binding protein (G protein), gamma 12 [Source:MGI Symbol;Acc:MGI:1336171]
Sec61b	0.337836	5.13493e-180	0.953	0.818	9.70657e-176	1.99469	1.55975	Sec61 beta subunit [Source:MGI Symbol;Acc:MGI:1913462]
Chmp4b	0.285555	1.19167e-179	0.614	0.276	2.25262e-175	0.717103	0.381901	charged multivesicular body protein 4B [Source:MGI Symbol;Acc:MGI:1922858]
Vimp	-0.495716	2.15788e-179	0.638	0.692	4.07904e-175	0.791078	1.17799	NA
Herpud1	-0.550494	2.98595e-179	0.393	0.538	5.64435e-175	0.428526	0.835268	homocysteine-inducible, endoplasmic reticulum stress-inducible, ubiquitin-like domain member 1 [Source:MGI Symbol;Acc:MGI:1927406]
Ap2s1	0.299482	5.7318e-179	0.685	0.338	1.08348e-174	0.838805	0.468813	adaptor-related protein complex 2, sigma 1 subunit [Source:MGI Symbol;Acc:MGI:2141861]
mt-Atp6	-0.198331	8.92148e-179	1	1	1.68643e-174	3.88227	4.10325	mitochondrially encoded ATP synthase 6 [Source:MGI Symbol;Acc:MGI:99927]
Panct2	0.234202	1.00353e-178	0.174	0.014	1.89698e-174	0.167257	0.0171925	pluripotency-associated noncoding transcript 2 [Source:MGI Symbol;Acc:MGI:3643517]
mt-Nd1	-0.252703	1.12354e-178	0.998	0.999	2.12382e-174	2.97287	3.23852	mitochondrially encoded NADH dehydrogenase 1 [Source:MGI Symbol;Acc:MGI:101787]
Ndufc1	0.305412	1.15828e-178	0.894	0.619	2.1895e-174	1.45255	0.996164	NADH:ubiquinone oxidoreductase subunit C1 [Source:MGI Symbol;Acc:MGI:1913627]
Car8	0.344781	1.28295e-178	0.762	0.443	2.42516e-174	1.10229	0.667918	carbonic anhydrase 8 [Source:MGI Symbol;Acc:MGI:88253]
2700094K13Rik	0.41741	5.30216e-177	0.76	0.45	1.00227e-172	1.11662	0.667069	NA
Nhp2	0.259125	2.86598e-176	0.441	0.162	5.41756e-172	0.473048	0.217071	NHP2 ribonucleoprotein [Source:MGI Symbol;Acc:MGI:1098547]
Pla2g1b	-0.494295	4.38473e-176	0.789	0.791	8.28845e-172	1.22281	1.61468	phospholipase A2, group IB, pancreas [Source:MGI Symbol;Acc:MGI:101842]
Eif1	-0.225989	8.73154e-176	0.996	0.998	1.65052e-171	2.80105	3.02333	eukaryotic translation initiation factor 1 [Source:MGI Symbol;Acc:MGI:105125]
Ifngr2	0.242207	3.91277e-175	0.237	0.045	7.39632e-171	0.234605	0.058642	interferon gamma receptor 2 [Source:MGI Symbol;Acc:MGI:107654]
Krt19	0.344355	9.06352e-175	0.41	0.149	1.71328e-170	0.500307	0.220637	keratin 19 [Source:MGI Symbol;Acc:MGI:96693]
Socs2	0.356243	9.63108e-175	0.858	0.578	1.82056e-170	1.39083	0.926899	suppressor of cytokine signaling 2 [Source:MGI Symbol;Acc:MGI:1201787]
H2-T22	0.232609	1.60772e-174	0.24	0.047	3.03907e-170	0.233496	0.0611736	histocompatibility 2, T region locus 22 [Source:MGI Symbol;Acc:MGI:95956]
S100a14	0.294907	3.61171e-174	0.228	0.042	6.82722e-170	0.245455	0.0567309	S100 calcium binding protein A14 [Source:MGI Symbol;Acc:MGI:1913416]
Tcn2	0.24526	6.19501e-174	0.374	0.121	1.17104e-169	0.381095	0.158658	transcobalamin 2 [Source:MGI Symbol;Acc:MGI:98534]
Spc24	0.344287	7.13034e-174	0.223	0.041	1.34785e-169	0.264657	0.0550079	SPC24, NDC80 kinetochore complex component, homolog (S. cerevisiae) [Source:MGI Symbol;Acc:MGI:1914879]
Yipf6	0.276883	1.72511e-173	0.463	0.181	3.26098e-169	0.503808	0.236245	Yip1 domain family, member 6 [Source:MGI Symbol;Acc:MGI:1925179]
Slco4c1	0.297097	2.85543e-173	0.482	0.194	5.39762e-169	0.546679	0.261465	solute carrier organic anion transporter family, member 4C1 [Source:MGI Symbol;Acc:MGI:2442784]
A230065H16Rik	0.443325	3.53394e-173	0.139	0.001	6.6802e-169	0.175722	0.00234332	NA
Cox6a1	0.257138	7.90992e-173	0.971	0.852	1.49521e-168	2.04358	1.65246	cytochrome c oxidase subunit 6A1 [Source:MGI Symbol;Acc:MGI:103099]
Pla2g16	0.22771	1.51679e-172	0.439	0.163	2.86719e-168	0.475342	0.226065	NA
Mrps14	0.300486	1.7619e-172	0.672	0.334	3.33052e-168	0.827871	0.464702	mitochondrial ribosomal protein S14 [Source:MGI Symbol;Acc:MGI:1928141]
Inmt	-1.51041	2.62604e-172	0.007	0.13	4.964e-168	0.0121491	0.322789	indolethylamine N-methyltransferase [Source:MGI Symbol;Acc:MGI:102963]
Malt1	0.217439	2.83418e-172	0.159	0.01	5.35745e-168	0.151185	0.0123119	MALT1 paracaspase [Source:MGI Symbol;Acc:MGI:2445027]
Noxo1	0.219427	3.06415e-172	0.173	0.016	5.79217e-168	0.164319	0.0194404	NADPH oxidase organizer 1 [Source:MGI Symbol;Acc:MGI:1919143]
Psmb7	0.289991	1.12639e-171	0.563	0.25	2.12922e-167	0.65072	0.337416	proteasome (prosome, macropain) subunit, beta type 7 [Source:MGI Symbol;Acc:MGI:107637]
Ndufs3	0.285278	4.4091e-171	0.608	0.284	8.33453e-167	0.715389	0.386138	NADH:ubiquinone oxidoreductase core subunit S3 [Source:MGI Symbol;Acc:MGI:1915599]
Ube2n	0.276749	4.91244e-171	0.572	0.252	9.28599e-167	0.651677	0.341245	ubiquitin-conjugating enzyme E2N [Source:MGI Symbol;Acc:MGI:1934835]
Cst8	-0.490514	8.80157e-171	0.067	0.236	1.66376e-166	0.0682345	0.341869	cystatin 8 (cystatin-related epididymal spermatogenic) [Source:MGI Symbol;Acc:MGI:107161]
Lsm4	0.305251	4.19143e-170	0.625	0.301	7.92305e-166	0.758433	0.414894	LSM4 homolog, U6 small nuclear RNA and mRNA degradation associated [Source:MGI Symbol;Acc:MGI:1354692]
Gkn3	0.372809	7.41326e-170	0.286	0.077	1.40133e-165	0.34963	0.109921	gastrokine 3 [Source:MGI Symbol;Acc:MGI:1916138]
Mpc1	0.28572	1.23287e-169	0.815	0.503	2.33049e-165	1.18652	0.763637	mitochondrial pyruvate carrier 1 [Source:MGI Symbol;Acc:MGI:1915240]
Ndufb8	0.321952	1.58612e-169	0.833	0.544	2.99824e-165	1.26468	0.830574	NADH:ubiquinone oxidoreductase subunit B8 [Source:MGI Symbol;Acc:MGI:1914514]
Mrpl18	0.260411	2.90086e-169	0.512	0.211	5.48349e-165	0.556677	0.279099	mitochondrial ribosomal protein L18 [Source:MGI Symbol;Acc:MGI:1914931]
Scgb1c1	-0.579262	1.59575e-167	0.262	0.432	3.01645e-163	0.270028	0.654621	secretoglobin, family 1C, member 1 [Source:MGI Symbol;Acc:MGI:2655401]
Ndufb7	0.309704	5.60443e-167	0.875	0.59	1.05941e-162	1.36087	0.921166	NADH:ubiquinone oxidoreductase subunit B7 [Source:MGI Symbol;Acc:MGI:1914166]
Tpm3	0.293048	9.28678e-167	0.642	0.311	1.75548e-162	0.784742	0.437388	tropomyosin 3, gamma [Source:MGI Symbol;Acc:MGI:1890149]
Jund	-0.442768	4.96087e-166	0.855	0.838	9.37753e-162	1.33123	1.67013	jun D proto-oncogene [Source:MGI Symbol;Acc:MGI:96648]
Rpl18a	-0.188105	2.73758e-165	0.999	0.998	5.17486e-161	3.26534	3.448	ribosomal protein L18A [Source:MGI Symbol;Acc:MGI:1924058]
Rpl35a	-0.209542	3.6774e-165	0.996	0.997	6.95139e-161	3.01852	3.2177	ribosomal protein L35A [Source:MGI Symbol;Acc:MGI:1928894]
1110065P20Rik	0.246653	7.88804e-164	0.442	0.168	1.49108e-159	0.469522	0.223684	RIKEN cDNA 1110065P20 gene [Source:MGI Symbol;Acc:MGI:1916170]
Eno1	0.227527	1.1234e-163	0.331	0.102	2.12357e-159	0.335444	0.13432	enolase 1, alpha non-neuron [Source:MGI Symbol;Acc:MGI:95393]
Plxnb2	0.252429	3.81817e-163	0.404	0.146	7.21749e-159	0.429697	0.194985	plexin B2 [Source:MGI Symbol;Acc:MGI:2154239]
Ctsc	0.352495	4.08012e-163	0.919	0.731	7.71264e-159	1.83325	1.36279	cathepsin C [Source:MGI Symbol;Acc:MGI:109553]
Cxcl15	0.295756	6.39691e-163	0.998	0.979	1.20921e-158	4.15328	3.77669	chemokine (C-X-C motif) ligand 15 [Source:MGI Symbol;Acc:MGI:1339941]
Rfk	0.245381	1.41003e-161	0.419	0.156	2.66538e-157	0.443402	0.207986	riboflavin kinase [Source:MGI Symbol;Acc:MGI:1914688]
Ran	0.365305	1.68795e-161	0.667	0.358	3.19072e-157	0.893507	0.510059	RAN, member RAS oncogene family [Source:MGI Symbol;Acc:MGI:1333112]
Atp5d	0.262008	4.21795e-161	0.954	0.789	7.9732e-157	1.82097	1.41912	ATP synthase, H+ transporting, mitochondrial F1 complex, delta subunit [Source:MGI Symbol;Acc:MGI:1913293]
Sra1	0.247049	4.51666e-161	0.496	0.206	8.53784e-157	0.539062	0.274514	steroid receptor RNA activator 1 [Source:MGI Symbol;Acc:MGI:1344414]
2810417H13Rik	0.484383	2.2117e-160	0.14	0.006	4.18079e-156	0.211757	0.00768029	NA
Ube2c	0.496498	3.5228e-160	0.161	0.015	6.65915e-156	0.234535	0.0303409	ubiquitin-conjugating enzyme E2C [Source:MGI Symbol;Acc:MGI:1915862]
Pgm2	0.226199	1.31901e-159	0.321	0.098	2.49332e-155	0.319623	0.126417	phosphoglucomutase 2 [Source:MGI Symbol;Acc:MGI:97564]
Eif1ax	0.24573	1.13232e-158	0.436	0.169	2.14042e-154	0.463257	0.221674	eukaryotic translation initiation factor 1A, X-linked [Source:MGI Symbol;Acc:MGI:1913485]
Brd7	0.27644	2.06404e-158	0.63	0.304	3.90165e-154	0.759504	0.427897	bromodomain containing 7 [Source:MGI Symbol;Acc:MGI:1349766]
Ppa1	0.220219	6.39631e-158	0.245	0.057	1.20909e-153	0.239875	0.0725134	pyrophosphatase (inorganic) 1 [Source:MGI Symbol;Acc:MGI:97831]
Tpd52	0.225593	9.474e-158	0.472	0.188	1.79087e-153	0.495815	0.250789	tumor protein D52 [Source:MGI Symbol;Acc:MGI:107749]
Ndufa13	0.253935	1.32188e-157	0.961	0.823	2.49876e-153	1.90565	1.52246	NADH:ubiquinone oxidoreductase subunit A13 [Source:MGI Symbol;Acc:MGI:1914434]
Fam107b	0.19831	1.46407e-157	0.141	0.007	2.76754e-153	0.13409	0.00854812	family with sequence similarity 107, member B [Source:MGI Symbol;Acc:MGI:1913790]
Egfl7	0.20765	1.48302e-157	0.231	0.049	2.80335e-153	0.22046	0.0622837	EGF-like domain 7 [Source:MGI Symbol;Acc:MGI:2449923]
Psma1	0.26709	2.23324e-157	0.536	0.24	4.2215e-153	0.609105	0.321	proteasome (prosome, macropain) subunit, alpha type 1 [Source:MGI Symbol;Acc:MGI:1347005]
Sdhc	0.24476	2.81653e-157	0.543	0.239	5.32409e-153	0.598912	0.319168	succinate dehydrogenase complex, subunit C, integral membrane protein [Source:MGI Symbol;Acc:MGI:1913302]
Vdac2	0.257316	3.53395e-157	0.575	0.263	6.68022e-153	0.654661	0.35644	voltage-dependent anion channel 2 [Source:MGI Symbol;Acc:MGI:106915]
Timm17a	0.2212	8.06465e-157	0.466	0.185	1.52446e-152	0.487224	0.245704	translocase of inner mitochondrial membrane 17a [Source:MGI Symbol;Acc:MGI:1343131]
Hcfc1r1	0.27948	6.82936e-156	0.726	0.395	1.29095e-151	0.95104	0.574976	host cell factor C1 regulator 1 (XPO1-dependent) [Source:MGI Symbol;Acc:MGI:2663619]
Arpc3	0.301478	1.06158e-155	0.757	0.438	2.00671e-151	1.02256	0.632394	actin related protein 2/3 complex, subunit 3 [Source:MGI Symbol;Acc:MGI:1928375]
Mrpl54	0.270972	2.82496e-155	0.67	0.341	5.34003e-151	0.814225	0.473984	mitochondrial ribosomal protein L54 [Source:MGI Symbol;Acc:MGI:1913297]
Pomp	0.29579	4.19369e-154	0.822	0.515	7.92733e-150	1.18634	0.774406	proteasome maturation protein [Source:MGI Symbol;Acc:MGI:1913787]
Uqcrc1	0.242785	1.17255e-153	0.532	0.235	2.21647e-149	0.592316	0.316704	ubiquinol-cytochrome c reductase core protein 1 [Source:MGI Symbol;Acc:MGI:107876]
Cldn4	0.315485	1.79043e-153	0.146	0.011	3.38444e-149	0.175351	0.0154692	claudin 4 [Source:MGI Symbol;Acc:MGI:1313314]
Snrpd1	0.283856	2.06968e-153	0.532	0.243	3.91232e-149	0.619046	0.327073	small nuclear ribonucleoprotein D1 [Source:MGI Symbol;Acc:MGI:98344]
Anxa4	0.26539	2.49485e-153	0.653	0.325	4.71601e-149	0.787014	0.454242	annexin A4 [Source:MGI Symbol;Acc:MGI:88030]
Phlda1	0.395907	4.2494e-153	0.725	0.433	8.03264e-149	1.15831	0.714303	pleckstrin homology like domain, family A, member 1 [Source:MGI Symbol;Acc:MGI:1096880]
Prdx2	0.291104	1.02363e-152	0.821	0.526	1.93496e-148	1.19809	0.791585	peroxiredoxin 2 [Source:MGI Symbol;Acc:MGI:109486]
Urah	0.258372	1.4747e-152	0.531	0.238	2.78762e-148	0.599395	0.319174	urate (5-hydroxyiso-) hydrolase [Source:MGI Symbol;Acc:MGI:1916142]
Ssr4	0.298158	4.30722e-152	0.831	0.541	8.14193e-148	1.2413	0.82688	signal sequence receptor, delta [Source:MGI Symbol;Acc:MGI:1099464]
Gm42722	0.194864	1.13012e-151	0.146	0.011	2.13626e-147	0.138942	0.0135869	predicted gene 42722 [Source:MGI Symbol;Acc:MGI:5662859]
Haus7	0.211164	1.30822e-151	0.249	0.062	2.47293e-147	0.243136	0.0786944	HAUS augmin-like complex, subunit 7 [Source:MGI Symbol;Acc:MGI:1920988]
Atp11a	0.290356	1.38338e-151	0.746	0.419	2.615e-147	0.999832	0.615889	ATPase, class VI, type 11A [Source:MGI Symbol;Acc:MGI:1354735]
Dhrs4	0.206222	1.78706e-151	0.312	0.096	3.37808e-147	0.303505	0.122648	dehydrogenase/reductase (SDR family) member 4 [Source:MGI Symbol;Acc:MGI:90169]
Rab11a	0.270219	2.57377e-151	0.612	0.299	4.86519e-147	0.721854	0.407452	RAB11A, member RAS oncogene family [Source:MGI Symbol;Acc:MGI:1858202]
Lgals9	0.226977	5.00428e-151	0.331	0.108	9.4596e-147	0.335071	0.139337	lectin, galactose binding, soluble 9 [Source:MGI Symbol;Acc:MGI:109496]
Cnih4	0.226049	1.30088e-150	0.403	0.152	2.45905e-146	0.419222	0.198847	cornichon family AMPA receptor auxiliary protein 4 [Source:MGI Symbol;Acc:MGI:1925828]
Abhd11	0.212663	3.1457e-150	0.402	0.149	5.94631e-146	0.407493	0.19508	abhydrolase domain containing 11 [Source:MGI Symbol;Acc:MGI:1916008]
Unc119	0.235835	4.13643e-150	0.417	0.163	7.81909e-146	0.442407	0.213507	unc-119 lipid binding chaperone [Source:MGI Symbol;Acc:MGI:1328357]
Eva1b	0.202439	1.17118e-149	0.408	0.154	2.21388e-145	0.429387	0.212559	eva-1 homolog B (C. elegans) [Source:MGI Symbol;Acc:MGI:1922063]
Syngr2	0.227061	2.51595e-149	0.379	0.137	4.75589e-145	0.391491	0.180496	synaptogyrin 2 [Source:MGI Symbol;Acc:MGI:1328324]
Rab27b	0.242849	5.0563e-149	0.513	0.224	9.55792e-145	0.570569	0.303661	RAB27B, member RAS oncogene family [Source:MGI Symbol;Acc:MGI:1931295]
Ptp4a2	0.25486	2.22309e-148	0.531	0.239	4.2023e-144	0.601202	0.324039	protein tyrosine phosphatase 4a2 [Source:MGI Symbol;Acc:MGI:1277117]
S100g	-0.396133	2.74987e-148	0.972	0.958	5.19809e-144	2.73041	3.10878	S100 calcium binding protein G [Source:MGI Symbol;Acc:MGI:104528]
Cenpm	0.241578	3.28212e-148	0.136	0.008	6.2042e-144	0.148701	0.00987728	centromere protein M [Source:MGI Symbol;Acc:MGI:1913820]
Ak1	0.219896	3.72661e-148	0.297	0.09	7.04441e-144	0.30039	0.117111	adenylate kinase 1 [Source:MGI Symbol;Acc:MGI:87977]
Slc25a39	0.208598	9.26479e-148	0.402	0.151	1.75132e-143	0.408729	0.197759	solute carrier family 25, member 39 [Source:MGI Symbol;Acc:MGI:1196386]
Hdgf	0.269864	1.76448e-147	0.551	0.258	3.33539e-143	0.646149	0.353585	heparin binding growth factor [Source:MGI Symbol;Acc:MGI:1194494]
Churc1	0.254907	1.85967e-147	0.61	0.299	3.51534e-143	0.718558	0.409895	churchill domain containing 1 [Source:MGI Symbol;Acc:MGI:1923684]
Hint2	0.275424	2.62767e-146	0.783	0.467	4.96709e-142	1.07568	0.689327	histidine triad nucleotide binding protein 2 [Source:MGI Symbol;Acc:MGI:1916167]
2010107E04Rik	0.263244	2.8803e-146	0.913	0.677	5.44463e-142	1.53562	1.12198	NA
Tusc3	0.209757	3.71574e-146	0.448	0.182	7.02385e-142	0.473916	0.243732	tumor suppressor candidate 3 [Source:MGI Symbol;Acc:MGI:1933134]
Tpt1	-0.220003	4.2698e-146	0.992	0.991	8.0712e-142	2.64892	2.84112	tumor protein, translationally-controlled 1 [Source:MGI Symbol;Acc:MGI:104890]
Cdca3	0.309718	5.54278e-146	0.14	0.011	1.04775e-141	0.177822	0.015562	cell division cycle associated 3 [Source:MGI Symbol;Acc:MGI:1315198]
Rabac1	-0.345192	1.04729e-145	0.868	0.83	1.97969e-141	1.3098	1.56649	Rab acceptor 1 (prenylated) [Source:MGI Symbol;Acc:MGI:1201692]
Ang	-0.554194	2.39366e-145	0.355	0.485	4.52473e-141	0.375202	0.751	angiogenin, ribonuclease, RNase A family, 5 [Source:MGI Symbol;Acc:MGI:88022]
Hint1	0.247361	3.94877e-145	0.952	0.792	7.46437e-141	1.84541	1.45146	histidine triad nucleotide binding protein 1 [Source:MGI Symbol;Acc:MGI:1321133]
Atp5k	0.262603	5.43686e-145	0.935	0.745	1.02773e-140	1.70028	1.29889	ATP synthase, H+ transporting, mitochondrial F1F0 complex, subunit E [Source:MGI Symbol;Acc:MGI:106636]
Uqcrc2	0.221981	1.38212e-144	0.422	0.168	2.61263e-140	0.437671	0.216564	ubiquinol cytochrome c reductase core protein 2 [Source:MGI Symbol;Acc:MGI:1914253]
Ptpn2	0.191809	7.98825e-144	0.205	0.041	1.51002e-139	0.19453	0.0532777	protein tyrosine phosphatase, non-receptor type 2 [Source:MGI Symbol;Acc:MGI:97806]
Icam1	0.306077	8.93475e-144	0.686	0.375	1.68894e-139	0.909697	0.54821	intercellular adhesion molecule 1 [Source:MGI Symbol;Acc:MGI:96392]
Tceb2	0.266059	9.44745e-144	0.955	0.822	1.78585e-139	1.89855	1.52282	NA
Tspan14	0.195113	1.74776e-143	0.214	0.047	3.30378e-139	0.203895	0.0589091	tetraspanin 14 [Source:MGI Symbol;Acc:MGI:1196325]
Rpl35	-0.206625	2.33502e-143	0.991	0.992	4.41388e-139	2.78148	2.97557	ribosomal protein L35 [Source:MGI Symbol;Acc:MGI:1913739]
Ptma	0.368604	4.06753e-143	0.996	0.977	7.68885e-139	2.93467	2.58322	prothymosin alpha [Source:MGI Symbol;Acc:MGI:97803]
Rpl36a	-0.239545	2.20192e-142	0.985	0.977	4.16228e-138	2.31247	2.5217	ribosomal protein L36A [Source:MGI Symbol;Acc:MGI:1201789]
Atp6v1g1	0.246013	3.26761e-142	0.968	0.84	6.17676e-138	1.98848	1.61326	ATPase, H+ transporting, lysosomal V1 subunit G1 [Source:MGI Symbol;Acc:MGI:1913540]
Ap1s1	0.20415	6.55701e-142	0.349	0.123	1.23947e-137	0.349123	0.159379	adaptor protein complex AP-1, sigma 1 [Source:MGI Symbol;Acc:MGI:1098244]
Hn1	0.305697	1.02434e-140	0.356	0.135	1.93631e-136	0.421562	0.186821	NA
Dctpp1	0.222009	2.61151e-140	0.293	0.092	4.93654e-136	0.296171	0.11781	dCTP pyrophosphatase 1 [Source:MGI Symbol;Acc:MGI:1913672]
Ube2m	0.209183	3.09784e-140	0.33	0.114	5.85584e-136	0.328619	0.143941	ubiquitin-conjugating enzyme E2M [Source:MGI Symbol;Acc:MGI:108278]
Ndufaf3	0.227396	3.16775e-140	0.413	0.165	5.988e-136	0.439569	0.218627	NADH:ubiquinone oxidoreductase complex assembly factor 3 [Source:MGI Symbol;Acc:MGI:1913956]
Gpx2	0.266338	3.64532e-140	0.26	0.076	6.89075e-136	0.301761	0.109577	glutathione peroxidase 2 [Source:MGI Symbol;Acc:MGI:106609]
Atp5a1	0.269455	4.93827e-140	0.802	0.5	9.33481e-136	1.1406	0.75192	ATP synthase, H+ transporting, mitochondrial F1 complex, alpha subunit 1 [Source:MGI Symbol;Acc:MGI:88115]
Cd55	0.206893	7.25226e-140	0.31	0.102	1.37089e-135	0.3063	0.129495	CD55 molecule, decay accelerating factor for complement [Source:MGI Symbol;Acc:MGI:104850]
Bpifa1	-0.797785	7.87849e-140	0.015	0.127	1.48927e-135	0.0189501	0.179647	BPI fold containing family A, member 1 [Source:MGI Symbol;Acc:MGI:1338036]
Psmd14	0.186871	1.32524e-139	0.282	0.086	2.5051e-135	0.269835	0.107447	proteasome (prosome, macropain) 26S subunit, non-ATPase, 14 [Source:MGI Symbol;Acc:MGI:1913284]
Psmb6	0.279889	1.85914e-139	0.783	0.486	3.51434e-135	1.09891	0.718231	proteasome (prosome, macropain) subunit, beta type 6 [Source:MGI Symbol;Acc:MGI:104880]
Ccdc25	0.190082	2.69717e-139	0.253	0.069	5.09846e-135	0.241238	0.0868796	coiled-coil domain containing 25 [Source:MGI Symbol;Acc:MGI:1914429]
Glul	-0.514179	3.01463e-139	0.279	0.422	5.69856e-135	0.278341	0.618495	glutamate-ammonia ligase (glutamine synthetase) [Source:MGI Symbol;Acc:MGI:95739]
Gm20186	0.21912	3.89135e-139	0.166	0.024	7.35582e-135	0.172956	0.0331512	predicted gene, 20186 [Source:MGI Symbol;Acc:MGI:5012371]
AW112010	0.572851	1.2286e-138	0.198	0.042	2.32243e-134	0.276181	0.0642808	expressed sequence AW112010 [Source:MGI Symbol;Acc:MGI:2147706]
Ndufa9	0.194727	2.28207e-138	0.375	0.14	4.31379e-134	0.375151	0.181874	NADH:ubiquinone oxidoreductase subunit A9 [Source:MGI Symbol;Acc:MGI:1913358]
Hint3	0.205235	3.92301e-138	0.412	0.164	7.41566e-134	0.42556	0.215174	histidine triad nucleotide binding protein 3 [Source:MGI Symbol;Acc:MGI:1914097]
Aldh2	-0.469219	7.31074e-138	0.578	0.619	1.38195e-133	0.666632	1.00593	aldehyde dehydrogenase 2, mitochondrial [Source:MGI Symbol;Acc:MGI:99600]
Hmgn1	0.297355	1.11216e-137	0.912	0.717	2.10231e-133	1.67594	1.26196	high mobility group nucleosomal binding domain 1 [Source:MGI Symbol;Acc:MGI:96120]
Lasp1	0.207166	1.14873e-137	0.315	0.106	2.17144e-133	0.318873	0.139365	LIM and SH3 protein 1 [Source:MGI Symbol;Acc:MGI:109656]
Clic3	0.331755	1.34995e-137	0.72	0.424	2.5518e-133	1.04141	0.653263	chloride intracellular channel 3 [Source:MGI Symbol;Acc:MGI:1916704]
Lpcat1	-0.439462	2.6516e-137	0.769	0.755	5.01232e-133	1.10286	1.43071	lysophosphatidylcholine acyltransferase 1 [Source:MGI Symbol;Acc:MGI:2384812]
Actl6a	0.210151	8.45183e-137	0.406	0.161	1.59765e-132	0.419707	0.211134	actin-like 6A [Source:MGI Symbol;Acc:MGI:1861453]
Ftl1	-0.261877	1.35776e-136	0.999	0.998	2.56658e-132	3.08897	3.31296	ferritin light polypeptide 1 [Source:MGI Symbol;Acc:MGI:95589]
Cox20	0.223274	2.09273e-136	0.551	0.258	3.95589e-132	0.625565	0.356304	cytochrome c oxidase assembly protein 20 [Source:MGI Symbol;Acc:MGI:1913609]
Tnfsf13os	0.191495	3.91153e-136	0.231	0.059	7.39397e-132	0.220989	0.072708	tumor necrosis factor (ligand) superfamily, member 13, opposite strand [Source:MGI Symbol;Acc:MGI:1919587]
Cpm	-0.53628	4.58959e-136	0.324	0.456	8.67569e-132	0.341353	0.700873	carboxypeptidase M [Source:MGI Symbol;Acc:MGI:1917824]
Cdk1	0.312749	6.42739e-136	0.134	0.011	1.21497e-131	0.171848	0.0175681	cyclin-dependent kinase 1 [Source:MGI Symbol;Acc:MGI:88351]
Tyms	0.229155	1.95487e-135	0.198	0.042	3.69529e-131	0.203984	0.0529824	thymidylate synthase [Source:MGI Symbol;Acc:MGI:98878]
Fundc2	0.199141	1.97361e-135	0.407	0.162	3.73072e-131	0.423783	0.216182	FUN14 domain containing 2 [Source:MGI Symbol;Acc:MGI:1914641]
Dhrs1	0.189175	3.01419e-135	0.263	0.076	5.69773e-131	0.253019	0.0966668	dehydrogenase/reductase (SDR family) member 1 [Source:MGI Symbol;Acc:MGI:1196314]
Spcs1	0.269373	5.64164e-135	0.843	0.57	1.06644e-130	1.27923	0.885109	signal peptidase complex subunit 1 homolog (S. cerevisiae) [Source:MGI Symbol;Acc:MGI:1916269]
Zfp385b	0.183495	7.94744e-135	0.215	0.05	1.5023e-130	0.203361	0.0640236	zinc finger protein 385B [Source:MGI Symbol;Acc:MGI:2444734]
Pdzk1ip1	0.247278	3.08711e-134	0.625	0.324	5.83557e-130	0.770726	0.462001	PDZK1 interacting protein 1 [Source:MGI Symbol;Acc:MGI:1914432]
Commd2	0.215182	9.61742e-134	0.431	0.181	1.81798e-129	0.451991	0.234481	COMM domain containing 2 [Source:MGI Symbol;Acc:MGI:1098806]
Nkd1	0.25296	1.16073e-133	0.623	0.324	2.19413e-129	0.775945	0.463386	naked cuticle 1 [Source:MGI Symbol;Acc:MGI:2135954]
Samhd1	0.20808	1.42576e-133	0.234	0.062	2.69511e-129	0.235924	0.0811904	SAM domain and HD domain, 1 [Source:MGI Symbol;Acc:MGI:1927468]
1810010H24Rik	-0.418065	1.78938e-133	0.056	0.192	3.38246e-129	0.0480667	0.26828	RIKEN cDNA 1810010H24 gene [Source:MGI Symbol;Acc:MGI:1916316]
Sdhd	0.197027	3.23334e-133	0.422	0.172	6.11199e-129	0.43941	0.228318	succinate dehydrogenase complex, subunit D, integral membrane protein [Source:MGI Symbol;Acc:MGI:1914175]
Dnlz	0.199329	5.41112e-133	0.382	0.148	1.02286e-128	0.387859	0.192064	DNL-type zinc finger [Source:MGI Symbol;Acc:MGI:106559]
Adam10	0.199199	7.26306e-133	0.266	0.08	1.37294e-128	0.263753	0.10302	a disintegrin and metallopeptidase domain 10 [Source:MGI Symbol;Acc:MGI:109548]
Ubl4a	0.201267	8.72497e-133	0.362	0.137	1.64928e-128	0.373915	0.180784	ubiquitin-like 4A [Source:MGI Symbol;Acc:MGI:95049]
Kras	0.19616	1.87067e-132	0.36	0.135	3.53612e-128	0.365926	0.176866	Kirsten rat sarcoma viral oncogene homolog [Source:MGI Symbol;Acc:MGI:96680]
Atp6v1g3	0.18765	1.99472e-132	0.166	0.027	3.77062e-128	0.160532	0.0337564	ATPase, H+ transporting, lysosomal V1 subunit G3 [Source:MGI Symbol;Acc:MGI:2450548]
Alad	0.221382	3.29058e-132	0.528	0.248	6.22019e-128	0.589907	0.333265	aminolevulinate, delta-, dehydratase [Source:MGI Symbol;Acc:MGI:96853]
Ndufa10	0.20086	5.46936e-132	0.488	0.214	1.03387e-127	0.519128	0.286503	NADH:ubiquinone oxidoreductase subunit A10 [Source:MGI Symbol;Acc:MGI:1914523]
Park7	0.250952	1.62637e-131	0.811	0.504	3.07432e-127	1.13984	0.761026	Parkinson disease (autosomal recessive, early onset) 7 [Source:MGI Symbol;Acc:MGI:2135637]
Aldh1a7	0.19784	3.24453e-131	0.377	0.146	6.13314e-127	0.384799	0.190639	aldehyde dehydrogenase family 1, subfamily A7 [Source:MGI Symbol;Acc:MGI:1347050]
Slc25a5	0.246291	3.51982e-131	0.848	0.591	6.65351e-127	1.35248	0.957494	solute carrier family 25 (mitochondrial carrier, adenine nucleotide translocator), member 5 [Source:MGI Symbol;Acc:MGI:1353496]
Acot1	-0.523498	8.24756e-131	0.257	0.398	1.55904e-126	0.254375	0.586065	acyl-CoA thioesterase 1 [Source:MGI Symbol;Acc:MGI:1349396]
Arl6ip1	0.313838	8.51886e-131	0.91	0.729	1.61032e-126	1.69423	1.28555	ADP-ribosylation factor-like 6 interacting protein 1 [Source:MGI Symbol;Acc:MGI:1858943]
Dram2	0.218657	1.04211e-130	0.513	0.236	1.96991e-126	0.564402	0.316369	DNA-damage regulated autophagy modulator 2 [Source:MGI Symbol;Acc:MGI:1914421]
Antxr1	0.191028	1.15915e-130	0.334	0.12	2.19115e-126	0.338557	0.159225	anthrax toxin receptor 1 [Source:MGI Symbol;Acc:MGI:1916788]
Nupr1	-0.377715	1.78846e-130	0.797	0.802	3.38073e-126	1.2892	1.63626	nuclear protein transcription regulator 1 [Source:MGI Symbol;Acc:MGI:1891834]
Apln	0.206262	5.06572e-130	0.105	0.001	9.57572e-126	0.112222	0.0010598	apelin [Source:MGI Symbol;Acc:MGI:1353624]
Dtymk	0.222691	6.26899e-130	0.374	0.148	1.18503e-125	0.398191	0.19407	deoxythymidylate kinase [Source:MGI Symbol;Acc:MGI:108396]
Tkt	0.237947	2.3039e-129	0.541	0.262	4.35506e-125	0.62382	0.357005	transketolase [Source:MGI Symbol;Acc:MGI:105992]
Pgap2	0.183896	5.87976e-129	0.254	0.075	1.11145e-124	0.246654	0.0957676	post-GPI attachment to proteins 2 [Source:MGI Symbol;Acc:MGI:2385286]
Mrpl20	0.223892	6.25128e-129	0.634	0.325	1.18168e-124	0.73962	0.446958	mitochondrial ribosomal protein L20 [Source:MGI Symbol;Acc:MGI:2137221]
Mdh1	0.246292	8.35603e-129	0.67	0.367	1.57954e-124	0.840687	0.518807	malate dehydrogenase 1, NAD (soluble) [Source:MGI Symbol;Acc:MGI:97051]
Calm3	0.215317	8.5791e-129	0.473	0.211	1.62171e-124	0.524245	0.288328	calmodulin 3 [Source:MGI Symbol;Acc:MGI:103249]
Bud31	0.207098	3.14394e-128	0.469	0.207	5.943e-124	0.500126	0.27381	BUD31 homolog [Source:MGI Symbol;Acc:MGI:2141291]
Ctsb	0.241572	3.71305e-128	0.769	0.462	7.01877e-124	1.04685	0.686895	cathepsin B [Source:MGI Symbol;Acc:MGI:88561]
Nudt14	0.195888	4.68243e-128	0.405	0.165	8.85119e-124	0.420297	0.218727	nudix (nucleoside diphosphate linked moiety X)-type motif 14 [Source:MGI Symbol;Acc:MGI:1913424]
Scd1	-0.515654	7.91452e-128	0.964	0.93	1.49608e-123	2.39881	2.75956	stearoyl-Coenzyme A desaturase 1 [Source:MGI Symbol;Acc:MGI:98239]
Ppp1r14b	0.182866	1.25492e-127	0.264	0.081	2.37217e-123	0.256791	0.10377	protein phosphatase 1, regulatory inhibitor subunit 14B [Source:MGI Symbol;Acc:MGI:107682]
Il6	0.18348	5.71191e-127	0.117	0.007	1.07972e-122	0.118201	0.00919982	interleukin 6 [Source:MGI Symbol;Acc:MGI:96559]
Mrps7	0.193106	6.49882e-127	0.363	0.14	1.22847e-122	0.364021	0.17951	mitchondrial ribosomal protein S7 [Source:MGI Symbol;Acc:MGI:1354367]
Mrps36	0.224858	1.04931e-126	0.614	0.313	1.98352e-122	0.717651	0.432145	mitochondrial ribosomal protein S36 [Source:MGI Symbol;Acc:MGI:1913378]
Hnrnpa1	0.264405	1.13465e-126	0.684	0.385	2.14483e-122	0.879005	0.548941	heterogeneous nuclear ribonucleoprotein A1 [Source:MGI Symbol;Acc:MGI:104820]
Psmb5	0.249815	2.08394e-126	0.676	0.371	3.93926e-122	0.84411	0.523409	proteasome (prosome, macropain) subunit, beta type 5 [Source:MGI Symbol;Acc:MGI:1194513]
Polr2g	0.193767	6.11598e-126	0.449	0.195	1.1561e-121	0.46887	0.255491	polymerase (RNA) II (DNA directed) polypeptide G [Source:MGI Symbol;Acc:MGI:1914960]
B4galnt1	0.186291	7.4579e-126	0.27	0.086	1.40977e-121	0.26765	0.111317	beta-1,4-N-acetyl-galactosaminyl transferase 1 [Source:MGI Symbol;Acc:MGI:1342057]
Chchd1	0.23157	7.93402e-126	0.619	0.316	1.49977e-121	0.724982	0.434877	coiled-coil-helix-coiled-coil-helix domain containing 1 [Source:MGI Symbol;Acc:MGI:1913371]
Ctps	0.187079	7.70715e-125	0.195	0.045	1.45688e-120	0.190746	0.0571691	cytidine 5'-triphosphate synthase [Source:MGI Symbol;Acc:MGI:1858304]
Plb1	0.221373	1.12163e-124	0.179	0.037	2.12022e-120	0.186354	0.0459565	phospholipase B1 [Source:MGI Symbol;Acc:MGI:1922406]
Rnh1	0.205114	1.22167e-124	0.459	0.205	2.30932e-120	0.494037	0.27156	ribonuclease/angiogenin inhibitor 1 [Source:MGI Symbol;Acc:MGI:1195456]
Cisd1	0.223826	1.36827e-124	0.618	0.317	2.58643e-120	0.722621	0.435626	CDGSH iron sulfur domain 1 [Source:MGI Symbol;Acc:MGI:1261855]
Tfrc	0.249704	1.88629e-124	0.437	0.196	3.56565e-120	0.507506	0.270964	transferrin receptor [Source:MGI Symbol;Acc:MGI:98822]
Spc25	0.19096	2.20363e-124	0.116	0.007	4.16553e-120	0.119325	0.00890209	SPC25, NDC80 kinetochore complex component, homolog (S. cerevisiae) [Source:MGI Symbol;Acc:MGI:1913692]
Ttc36	0.212146	4.83624e-124	0.302	0.107	9.14195e-120	0.312159	0.139042	tetratricopeptide repeat domain 36 [Source:MGI Symbol;Acc:MGI:2384760]
Cib1	0.192404	1.90793e-123	0.495	0.228	3.60656e-119	0.537174	0.307235	calcium and integrin binding 1 (calmyrin) [Source:MGI Symbol;Acc:MGI:1344418]
Slc1a3	0.191901	3.96996e-123	0.337	0.127	7.50441e-119	0.36105	0.177385	solute carrier family 1 (glial high affinity glutamate transporter), member 3 [Source:MGI Symbol;Acc:MGI:99917]
Dctn3	0.228666	6.154e-123	0.667	0.358	1.16329e-118	0.806645	0.500735	dynactin 3 [Source:MGI Symbol;Acc:MGI:1859251]
Edf1	0.242466	1.89689e-122	0.897	0.673	3.58569e-118	1.47436	1.09774	endothelial differentiation-related factor 1 [Source:MGI Symbol;Acc:MGI:1891227]
Snrpc	0.192759	4.52232e-122	0.425	0.183	8.54854e-118	0.447583	0.241762	U1 small nuclear ribonucleoprotein C [Source:MGI Symbol;Acc:MGI:109489]
Retnlg	0.256032	5.32766e-122	0.106	0.004	1.00709e-117	0.119322	0.00463692	resistin like gamma [Source:MGI Symbol;Acc:MGI:2667763]
Aes	0.242996	1.05616e-121	0.757	0.455	1.99647e-117	1.03065	0.677121	NA
Ezr	0.233853	2.8661e-121	0.691	0.387	5.41779e-117	0.893803	0.569845	ezrin [Source:MGI Symbol;Acc:MGI:98931]
Ppa2	0.185782	4.86109e-121	0.432	0.186	9.18891e-117	0.447475	0.244818	pyrophosphatase (inorganic) 2 [Source:MGI Symbol;Acc:MGI:1922026]
Isg15	0.229733	5.61892e-121	0.138	0.018	1.06215e-116	0.144992	0.0242876	ISG15 ubiquitin-like modifier [Source:MGI Symbol;Acc:MGI:1855694]
Esd	0.205582	9.48972e-121	0.45	0.2	1.79384e-116	0.472509	0.259426	esterase D/formylglutathione hydrolase [Source:MGI Symbol;Acc:MGI:95421]
H1fx	0.202445	2.16854e-120	0.143	0.021	4.09918e-116	0.15211	0.0281271	H1 histone family, member X [Source:MGI Symbol;Acc:MGI:2685307]
Mrps9	0.201276	2.5426e-120	0.464	0.213	4.80628e-116	0.532597	0.302501	mitochondrial ribosomal protein S9 [Source:MGI Symbol;Acc:MGI:1916777]
Mad2l1	0.189012	2.71307e-120	0.138	0.018	5.12852e-116	0.140165	0.0230547	MAD2 mitotic arrest deficient-like 1 [Source:MGI Symbol;Acc:MGI:1860374]
Efhd2	0.19273	3.00437e-120	0.382	0.157	5.67916e-116	0.394989	0.205766	EF hand domain containing 2 [Source:MGI Symbol;Acc:MGI:106504]
Sumo2	0.254896	3.42583e-120	0.863	0.61	6.47584e-116	1.36194	0.979233	small ubiquitin-like modifier 2 [Source:MGI Symbol;Acc:MGI:2158813]
Akr1a1	0.251325	3.5025e-120	0.88	0.63	6.62078e-116	1.40969	1.02217	aldo-keto reductase family 1, member A1 (aldehyde reductase) [Source:MGI Symbol;Acc:MGI:1929955]
Capzb	0.201334	3.8013e-120	0.539	0.26	7.1856e-116	0.611949	0.362208	capping protein (actin filament) muscle Z-line, beta [Source:MGI Symbol;Acc:MGI:104652]
Zdhhc3	-0.656939	5.58283e-120	0.483	0.548	1.05532e-115	0.553646	0.950191	zinc finger, DHHC domain containing 3 [Source:MGI Symbol;Acc:MGI:1926134]
Cfl2	0.186427	7.10272e-120	0.431	0.187	1.34263e-115	0.459293	0.25356	cofilin 2, muscle [Source:MGI Symbol;Acc:MGI:101763]
Mfap4	-1.04591	1.14036e-119	0.018	0.121	2.15562e-115	0.0265969	0.270014	microfibrillar-associated protein 4 [Source:MGI Symbol;Acc:MGI:1342276]
Ndufs5	0.249647	1.18129e-119	0.849	0.581	2.23299e-115	1.26935	0.897011	NADH:ubiquinone oxidoreductase core subunit S5 [Source:MGI Symbol;Acc:MGI:1890889]
Tk1	0.196195	2.19922e-119	0.114	0.008	4.15718e-115	0.120852	0.00947825	thymidine kinase 1 [Source:MGI Symbol;Acc:MGI:98763]
Mal	0.202967	4.64862e-119	0.493	0.229	8.78728e-115	0.539738	0.309552	myelin and lymphocyte protein, T cell differentiation protein [Source:MGI Symbol;Acc:MGI:892970]
Cldn7	0.244335	4.9918e-119	0.705	0.406	9.436e-115	0.933098	0.600754	claudin 7 [Source:MGI Symbol;Acc:MGI:1859285]
Lsm8	0.191519	8.74332e-119	0.363	0.146	1.65275e-114	0.376073	0.191206	LSM8 homolog, U6 small nuclear RNA associated [Source:MGI Symbol;Acc:MGI:1923772]
Psma5	0.188094	9.85521e-119	0.455	0.204	1.86293e-114	0.479272	0.26925	proteasome (prosome, macropain) subunit, alpha type 5 [Source:MGI Symbol;Acc:MGI:1347009]
Psma2	0.255087	2.36105e-118	0.757	0.469	4.46309e-114	1.03896	0.689628	proteasome (prosome, macropain) subunit, alpha type 2 [Source:MGI Symbol;Acc:MGI:104885]
Tnip3	0.3104	2.57691e-118	0.113	0.008	4.87114e-114	0.147511	0.0100124	TNFAIP3 interacting protein 3 [Source:MGI Symbol;Acc:MGI:3041165]
Hadh	0.198709	3.41382e-118	0.541	0.265	6.45315e-114	0.61564	0.366717	hydroxyacyl-Coenzyme A dehydrogenase [Source:MGI Symbol;Acc:MGI:96009]
Ndufs8	0.233645	6.15023e-118	0.667	0.368	1.16258e-113	0.816988	0.513166	NADH:ubiquinone oxidoreductase core subunit S8 [Source:MGI Symbol;Acc:MGI:2385079]
Slc35b1	0.183683	6.83909e-117	0.337	0.131	1.29279e-112	0.342004	0.170212	solute carrier family 35, member B1 [Source:MGI Symbol;Acc:MGI:1343133]
Coa3	0.238511	1.14335e-116	0.732	0.434	2.16127e-112	0.950723	0.621399	cytochrome C oxidase assembly factor 3 [Source:MGI Symbol;Acc:MGI:1098757]
Cd9	0.26255	1.6386e-116	0.946	0.813	3.09745e-112	2.00812	1.62295	CD9 antigen [Source:MGI Symbol;Acc:MGI:88348]
Aqp5	-0.418942	2.53694e-116	0.666	0.691	4.79557e-112	0.916701	1.25061	aquaporin 5 [Source:MGI Symbol;Acc:MGI:106215]
Glrx5	0.188513	3.98785e-116	0.491	0.232	7.53822e-112	0.537171	0.312525	glutaredoxin 5 [Source:MGI Symbol;Acc:MGI:1920296]
Ube2i	0.241216	5.15675e-116	0.719	0.423	9.7478e-112	0.940463	0.613276	ubiquitin-conjugating enzyme E2I [Source:MGI Symbol;Acc:MGI:107365]
Cdc20	0.305462	5.63153e-116	0.136	0.019	1.06453e-111	0.174492	0.0275571	cell division cycle 20 [Source:MGI Symbol;Acc:MGI:1859866]
Mrpl24	0.19548	7.02319e-116	0.499	0.235	1.32759e-111	0.540697	0.314869	mitochondrial ribosomal protein L24 [Source:MGI Symbol;Acc:MGI:1914957]
Cox6a2	-0.534537	1.0961e-115	0.515	0.602	2.07196e-111	0.712713	1.1154	cytochrome c oxidase subunit 6A2 [Source:MGI Symbol;Acc:MGI:104649]
Lgals3bp	0.182515	1.33548e-115	0.179	0.041	2.52447e-111	0.178642	0.0535732	lectin, galactoside-binding, soluble, 3 binding protein [Source:MGI Symbol;Acc:MGI:99554]
H2-DMb2	0.23504	4.80543e-115	0.192	0.049	9.0837e-111	0.212732	0.0649929	histocompatibility 2, class II, locus Mb2 [Source:MGI Symbol;Acc:MGI:95923]
Hist1h2ap	0.406271	9.32478e-115	0.103	0.005	1.76266e-110	0.154793	0.00732536	histone cluster 1, H2ap [Source:MGI Symbol;Acc:MGI:3710573]
Bola3	0.205277	1.44398e-114	0.589	0.305	2.72956e-110	0.690569	0.424327	bolA-like 3 (E. coli) [Source:MGI Symbol;Acc:MGI:1925903]
Tubb5	0.486902	1.51912e-114	0.462	0.235	2.87159e-110	0.654612	0.342851	tubulin, beta 5 class I [Source:MGI Symbol;Acc:MGI:107812]
mt-Co2	-0.195579	1.70326e-114	0.997	0.994	3.21967e-110	2.83888	3.03628	mitochondrially encoded cytochrome c oxidase II [Source:MGI Symbol;Acc:MGI:102503]
mt-Nd5	-0.393852	1.72281e-114	0.683	0.68	3.25663e-110	0.863211	1.15126	mitochondrially encoded NADH dehydrogenase 5 [Source:MGI Symbol;Acc:MGI:102496]
Tmem167	0.197845	4.11481e-114	0.56	0.279	7.77823e-110	0.636382	0.385497	transmembrane protein 167 [Source:MGI Symbol;Acc:MGI:1913324]
Cenpa	0.287968	2.0983e-113	0.123	0.014	3.96642e-109	0.161816	0.0215492	centromere protein A [Source:MGI Symbol;Acc:MGI:88375]
Cdc42	0.240693	3.41634e-113	0.761	0.468	6.45791e-109	1.03117	0.690949	cell division cycle 42 [Source:MGI Symbol;Acc:MGI:106211]
Eny2	0.217771	3.57179e-113	0.648	0.353	6.75175e-109	0.785237	0.495521	ENY2 transcription and export complex 2 subunit [Source:MGI Symbol;Acc:MGI:1919286]
Ssu72	0.191034	4.60795e-113	0.58	0.293	8.71041e-109	0.655014	0.401691	Ssu72 RNA polymerase II CTD phosphatase homolog (yeast) [Source:MGI Symbol;Acc:MGI:1916241]
Atp8a1	-0.452129	1.39392e-112	0.618	0.631	2.63492e-108	0.748331	1.06243	ATPase, aminophospholipid transporter (APLT), class I, type 8A, member 1 [Source:MGI Symbol;Acc:MGI:1330848]
Gja1	0.192175	2.66125e-112	0.472	0.222	5.03057e-108	0.539501	0.315591	gap junction protein, alpha 1 [Source:MGI Symbol;Acc:MGI:95713]
Erh	0.228603	6.46633e-112	0.704	0.405	1.22233e-107	0.911695	0.592435	ERH mRNA splicing and mitosis factor [Source:MGI Symbol;Acc:MGI:108089]
Chmp2a	0.224628	6.90989e-112	0.746	0.443	1.30618e-107	0.975617	0.646712	charged multivesicular body protein 2A [Source:MGI Symbol;Acc:MGI:1916203]
Ndufa11	0.237749	8.73524e-112	0.804	0.52	1.65122e-107	1.14011	0.785401	NADH:ubiquinone oxidoreductase subunit A11 [Source:MGI Symbol;Acc:MGI:1917125]
Tmem37	0.187545	1.33191e-111	0.331	0.13	2.51772e-107	0.341892	0.173403	transmembrane protein 37 [Source:MGI Symbol;Acc:MGI:2157899]
Rab9	0.210677	1.41062e-111	0.56	0.286	2.6665e-107	0.646756	0.392946	RAB9, member RAS oncogene family [Source:MGI Symbol;Acc:MGI:1890695]
Cd36	-0.344303	6.76313e-111	0.878	0.842	1.27843e-106	1.54932	1.79317	CD36 molecule [Source:MGI Symbol;Acc:MGI:107899]
Gas6	-0.489267	7.09456e-111	0.308	0.424	1.34108e-106	0.318309	0.635335	growth arrest specific 6 [Source:MGI Symbol;Acc:MGI:95660]
Slc34a2	-0.262492	2.88626e-110	0.961	0.921	5.45589e-106	2.57616	2.75591	solute carrier family 34 (sodium phosphate), member 2 [Source:MGI Symbol;Acc:MGI:1342284]
Sri	0.199299	7.29515e-110	0.557	0.285	1.379e-105	0.649147	0.398544	sorcin [Source:MGI Symbol;Acc:MGI:98419]
Tmem14c	0.203785	1.07534e-109	0.616	0.328	2.03272e-105	0.723939	0.45345	transmembrane protein 14C [Source:MGI Symbol;Acc:MGI:1913404]
Psmd8	0.232495	1.88592e-109	0.612	0.331	3.56495e-105	0.737718	0.459611	proteasome (prosome, macropain) 26S subunit, non-ATPase, 8 [Source:MGI Symbol;Acc:MGI:1888669]
Pf4	0.190197	2.49756e-109	0.22	0.067	4.72113e-105	0.228248	0.0871801	platelet factor 4 [Source:MGI Symbol;Acc:MGI:1888711]
Sat1	0.248122	3.82345e-109	0.762	0.485	7.22746e-105	1.10151	0.751037	spermidine/spermine N1-acetyl transferase 1 [Source:MGI Symbol;Acc:MGI:98233]
Ccnb2	0.205909	5.70249e-109	0.108	0.009	1.07794e-104	0.123157	0.0116663	cyclin B2 [Source:MGI Symbol;Acc:MGI:88311]
Aldoa	0.246282	1.16973e-108	0.821	0.555	2.21115e-104	1.22323	0.864491	aldolase A, fructose-bisphosphate [Source:MGI Symbol;Acc:MGI:87994]
Atp1b1	0.254745	1.46324e-108	0.964	0.858	2.76596e-104	2.17719	1.81555	ATPase, Na+/K+ transporting, beta 1 polypeptide [Source:MGI Symbol;Acc:MGI:88108]
BC021614	0.185554	7.31973e-108	0.328	0.132	1.38365e-103	0.344236	0.175264	NA
Cyp2b10	-0.471093	1.04906e-107	0.152	0.293	1.98305e-103	0.160506	0.434198	cytochrome P450, family 2, subfamily b, polypeptide 10 [Source:MGI Symbol;Acc:MGI:88598]
Ppp1ca	0.213155	3.08343e-107	0.671	0.376	5.8286e-103	0.834458	0.537266	protein phosphatase 1 catalytic subunit alpha [Source:MGI Symbol;Acc:MGI:103016]
Egr1	-0.595885	1.29095e-106	0.125	0.264	2.44027e-102	0.145733	0.438621	early growth response 1 [Source:MGI Symbol;Acc:MGI:95295]
Cd83	0.194126	2.41796e-106	0.129	0.019	4.57068e-102	0.137333	0.0254597	CD83 antigen [Source:MGI Symbol;Acc:MGI:1328316]
Gdi2	0.185174	3.85646e-106	0.538	0.27	7.28987e-102	0.602727	0.36937	guanosine diphosphate (GDP) dissociation inhibitor 2 [Source:MGI Symbol;Acc:MGI:99845]
Plp2	0.22375	6.00284e-106	0.553	0.292	1.13472e-101	0.66397	0.407927	proteolipid protein 2 [Source:MGI Symbol;Acc:MGI:1298382]
Btf3	0.219545	8.6845e-106	0.939	0.801	1.64163e-101	1.7816	1.45006	basic transcription factor 3 [Source:MGI Symbol;Acc:MGI:1202875]
Nrn1	-0.531691	1.88491e-105	0.176	0.314	3.56304e-101	0.191107	0.492054	neuritin 1 [Source:MGI Symbol;Acc:MGI:1915654]
Banf1	0.203708	5.7047e-105	0.449	0.217	1.07836e-100	0.49704	0.286612	barrier to autointegration factor 1 [Source:MGI Symbol;Acc:MGI:1346330]
Ddx5	-0.333122	1.02735e-104	0.8	0.76	1.94199e-100	1.11501	1.34852	DEAD (Asp-Glu-Ala-Asp) box polypeptide 5 [Source:MGI Symbol;Acc:MGI:105037]
Hprt	0.183461	2.79495e-104	0.477	0.229	5.2833e-100	0.516447	0.305549	hypoxanthine guanine phosphoribosyl transferase [Source:MGI Symbol;Acc:MGI:96217]
Lgi3	-0.45245	2.94506e-104	0.56	0.591	5.56705e-100	0.659376	0.971007	leucine-rich repeat LGI family, member 3 [Source:MGI Symbol;Acc:MGI:2182619]
Anp32b	0.200507	5.31007e-104	0.468	0.23	1.00376e-99	0.530117	0.312671	acidic (leucine-rich) nuclear phosphoprotein 32 family, member B [Source:MGI Symbol;Acc:MGI:1914878]
Fgfbp1	-0.316892	1.89821e-103	0.043	0.152	3.58818e-99	0.0397431	0.204907	fibroblast growth factor binding protein 1 [Source:MGI Symbol;Acc:MGI:1096350]
Ndufa7	0.198605	9.02862e-103	0.965	0.861	1.70668e-98	1.99134	1.67826	NADH:ubiquinone oxidoreductase subunit A7 [Source:MGI Symbol;Acc:MGI:1913666]
Sprr1a	0.562109	4.18353e-101	0.101	0.008	7.90813e-97	0.150834	0.0155353	small proline-rich protein 1A [Source:MGI Symbol;Acc:MGI:106660]
Wdr89	-0.317476	5.45556e-101	0.794	0.761	1.03126e-96	1.1052	1.33351	WD repeat domain 89 [Source:MGI Symbol;Acc:MGI:1919588]
Lamtor5	0.191032	1.04063e-100	0.62	0.337	1.9671e-96	0.725095	0.464564	late endosomal/lysosomal adaptor, MAPK and MTOR activator 5 [Source:MGI Symbol;Acc:MGI:1915826]
1810037I17Rik	0.212856	8.09194e-100	0.846	0.603	1.52962e-95	1.31187	0.965395	RIKEN cDNA 1810037I17 gene [Source:MGI Symbol;Acc:MGI:1914954]
Actb	0.258618	8.75617e-100	0.997	0.968	1.65518e-95	3.0725	2.72733	actin, beta [Source:MGI Symbol;Acc:MGI:87904]
Gadd45g	0.209534	2.06909e-99	0.619	0.359	3.9112e-95	0.863448	0.57085	growth arrest and DNA-damage-inducible 45 gamma [Source:MGI Symbol;Acc:MGI:1346325]
Anxa5	0.206987	7.41009e-99	0.728	0.459	1.40073e-94	1.05117	0.726281	annexin A5 [Source:MGI Symbol;Acc:MGI:106008]
Ndufa8	0.206509	8.82612e-99	0.644	0.358	1.6684e-94	0.769092	0.496763	NADH:ubiquinone oxidoreductase subunit A8 [Source:MGI Symbol;Acc:MGI:1915625]
Abca3	-0.403867	2.05311e-98	0.645	0.653	3.88098e-94	0.833935	1.12446	ATP-binding cassette, sub-family A (ABC1), member 3 [Source:MGI Symbol;Acc:MGI:1351617]
Cdkn3	0.195357	4.71173e-98	0.104	0.011	8.90658e-94	0.120935	0.015345	cyclin-dependent kinase inhibitor 3 [Source:MGI Symbol;Acc:MGI:1919641]
Tpi1	0.188021	2.61918e-97	0.589	0.316	4.95104e-93	0.685431	0.438407	triosephosphate isomerase 1 [Source:MGI Symbol;Acc:MGI:98797]
Mettl7a1	-0.425751	2.80136e-97	0.58	0.611	5.2954e-93	0.701803	0.997604	methyltransferase like 7A1 [Source:MGI Symbol;Acc:MGI:1916523]
Top2a	0.204829	5.02285e-97	0.102	0.01	9.4947e-93	0.124329	0.015865	topoisomerase (DNA) II alpha [Source:MGI Symbol;Acc:MGI:98790]
Epcam	0.281653	7.13523e-97	0.667	0.4	1.34877e-92	0.89119	0.585386	epithelial cell adhesion molecule [Source:MGI Symbol;Acc:MGI:106653]
Ppdpf	0.21582	7.67624e-97	0.747	0.464	1.45104e-92	0.998721	0.685723	pancreatic progenitor cell differentiation and proliferation factor [Source:MGI Symbol;Acc:MGI:1913746]
Gm9843	-0.356292	1.35928e-96	0.714	0.686	2.56945e-92	0.902761	1.14613	predicted gene 9843 [Source:MGI Symbol;Acc:MGI:3708621]
Anxa2	0.264364	3.08047e-96	0.825	0.575	5.82302e-92	1.30559	0.942023	annexin A2 [Source:MGI Symbol;Acc:MGI:88246]
Ccdc34	0.201872	3.89024e-96	0.159	0.04	7.35372e-92	0.177132	0.053695	coiled-coil domain containing 34 [Source:MGI Symbol;Acc:MGI:1915451]
Ranbp1	0.226594	4.109e-96	0.558	0.306	7.76724e-92	0.68171	0.429774	RAN binding protein 1 [Source:MGI Symbol;Acc:MGI:96269]
Npm1	0.247722	9.81849e-96	0.822	0.561	1.85599e-91	1.23254	0.882144	nucleophosmin 1 [Source:MGI Symbol;Acc:MGI:106184]
Sec61g	0.209798	1.20334e-95	0.979	0.925	2.27468e-91	2.32548	2.04787	SEC61, gamma subunit [Source:MGI Symbol;Acc:MGI:1202066]
Cenpf	0.191305	1.87099e-94	0.107	0.013	3.53673e-90	0.126936	0.0211283	centromere protein F [Source:MGI Symbol;Acc:MGI:1313302]
Ift20	0.23888	1.17333e-93	0.843	0.617	2.21795e-89	1.34633	1.0029	intraflagellar transport 20 [Source:MGI Symbol;Acc:MGI:1915585]
Ddx3x	-0.450349	3.5785e-93	0.334	0.425	6.76445e-89	0.336923	0.62597	DEAD/H (Asp-Glu-Ala-Asp/His) box polypeptide 3, X-linked [Source:MGI Symbol;Acc:MGI:103064]
Ndufa5	0.215739	4.82388e-93	0.78	0.507	9.11858e-89	1.08446	0.762834	NADH:ubiquinone oxidoreductase subunit A5 [Source:MGI Symbol;Acc:MGI:1915452]
Rbx1	0.199805	2.22167e-91	0.906	0.683	4.19962e-87	1.49412	1.14565	ring-box 1 [Source:MGI Symbol;Acc:MGI:1891829]
Dbi	0.218488	4.63177e-91	0.983	0.931	8.75543e-87	2.46774	2.17695	diazepam binding inhibitor [Source:MGI Symbol;Acc:MGI:94865]
Gsta4	0.188082	2.26253e-90	0.593	0.333	4.27687e-86	0.72085	0.47355	glutathione S-transferase, alpha 4 [Source:MGI Symbol;Acc:MGI:1309515]
Snrpe	0.215149	4.37772e-88	0.735	0.463	8.2752e-84	0.976973	0.676707	small nuclear ribonucleoprotein E [Source:MGI Symbol;Acc:MGI:98346]
Cuta	0.191432	7.35953e-88	0.695	0.411	1.39117e-83	0.871365	0.592208	cutA divalent cation tolerance homolog [Source:MGI Symbol;Acc:MGI:1914925]
Hk2	-0.45689	1.77125e-87	0.194	0.312	3.34819e-83	0.193608	0.455311	hexokinase 2 [Source:MGI Symbol;Acc:MGI:1315197]
Timm8b	0.185832	1.76151e-86	0.729	0.442	3.32978e-82	0.933669	0.64486	translocase of inner mitochondrial membrane 8B [Source:MGI Symbol;Acc:MGI:1353424]
Dcxr	0.232479	3.21036e-86	0.856	0.627	6.06855e-82	1.3797	1.03602	dicarbonyl L-xylulose reductase [Source:MGI Symbol;Acc:MGI:1915130]
Atp7b	-0.320136	3.63484e-86	0.068	0.175	6.87095e-82	0.0641635	0.235906	ATPase, Cu++ transporting, beta polypeptide [Source:MGI Symbol;Acc:MGI:103297]
Psmb3	0.209075	1.04817e-85	0.773	0.511	1.98135e-81	1.06848	0.761522	proteasome (prosome, macropain) subunit, beta type 3 [Source:MGI Symbol;Acc:MGI:1347014]
Ndufv3	0.198299	2.44235e-85	0.802	0.532	4.61677e-81	1.12568	0.810259	NADH:ubiquinone oxidoreductase core subunit V3 [Source:MGI Symbol;Acc:MGI:1890894]
Bambi	-0.433898	5.89155e-85	0.164	0.28	1.11368e-80	0.157647	0.40133	BMP and activin membrane-bound inhibitor [Source:MGI Symbol;Acc:MGI:1915260]
Nr1d1	-0.364075	1.94918e-84	0.108	0.222	3.68454e-80	0.100147	0.302458	nuclear receptor subfamily 1, group D, member 1 [Source:MGI Symbol;Acc:MGI:2444210]
Scgb3a1	-0.774468	3.04968e-84	0.097	0.21	5.76481e-80	0.107343	0.302526	secretoglobin, family 3A, member 1 [Source:MGI Symbol;Acc:MGI:1915912]
Abhd2	-0.541168	3.86224e-84	0.363	0.45	7.30079e-80	0.409731	0.73137	abhydrolase domain containing 2 [Source:MGI Symbol;Acc:MGI:1914344]
Ccnd2	-0.352567	1.89199e-81	0.071	0.177	3.57643e-77	0.073973	0.254731	cyclin D2 [Source:MGI Symbol;Acc:MGI:88314]
Atp6v0e	0.184222	9.34998e-80	0.804	0.541	1.76743e-75	1.12852	0.822788	ATPase, H+ transporting, lysosomal V0 subunit E [Source:MGI Symbol;Acc:MGI:1328318]
1110008F13Rik	0.187142	4.47625e-79	0.699	0.437	8.46146e-75	0.900706	0.630581	NA
Ndufb3	0.183709	5.95545e-78	0.819	0.566	1.12576e-73	1.18075	0.873059	NADH:ubiquinone oxidoreductase subunit B3 [Source:MGI Symbol;Acc:MGI:1913745]
mt-Nd3	-0.413047	9.12369e-78	0.327	0.411	1.72465e-73	0.338424	0.602757	mitochondrially encoded NADH dehydrogenase 3 [Source:MGI Symbol;Acc:MGI:102499]
Bex4	-0.367684	1.3137e-77	0.744	0.713	2.4833e-73	1.09953	1.34831	brain expressed X-linked 4 [Source:MGI Symbol;Acc:MGI:3606746]
Ubc	-0.358486	1.34444e-77	0.744	0.719	2.54139e-73	1.03317	1.26965	ubiquitin C [Source:MGI Symbol;Acc:MGI:98889]
Cd47	0.183868	3.14551e-77	0.593	0.346	5.94595e-73	0.724586	0.490833	CD47 antigen (Rh-related antigen, integrin-associated signal transducer) [Source:MGI Symbol;Acc:MGI:96617]
Vamp8	-0.18272	7.08443e-77	0.978	0.939	1.33917e-72	2.19201	2.30894	vesicle-associated membrane protein 8 [Source:MGI Symbol;Acc:MGI:1336882]
Hc	-0.323521	1.17645e-75	0.85	0.815	2.22384e-71	1.55743	1.80169	hemolytic complement [Source:MGI Symbol;Acc:MGI:96031]
Pfn1	-0.308878	2.83456e-74	0.709	0.682	5.35816e-70	0.942301	1.15512	profilin 1 [Source:MGI Symbol;Acc:MGI:97549]
Hp	-0.276641	4.25279e-74	0.733	0.729	8.03905e-70	1.15071	1.41028	haptoglobin [Source:MGI Symbol;Acc:MGI:96211]
Nfkbia	0.228018	5.77052e-73	0.453	0.258	1.0908e-68	0.624382	0.409316	nuclear factor of kappa light polypeptide gene enhancer in B cells inhibitor, alpha [Source:MGI Symbol;Acc:MGI:104741]
Gpx3	-1.05166	5.62622e-71	0.04	0.124	1.06353e-66	0.0479653	0.289608	glutathione peroxidase 3 [Source:MGI Symbol;Acc:MGI:105102]
Dusp1	-0.59018	1.18403e-69	0.418	0.473	2.23817e-65	0.488163	0.81007	dual specificity phosphatase 1 [Source:MGI Symbol;Acc:MGI:105120]
Nr4a1	-0.357984	2.9018e-67	0.08	0.175	5.48527e-63	0.0789234	0.25285	nuclear receptor subfamily 4, group A, member 1 [Source:MGI Symbol;Acc:MGI:1352454]
Pfdn5	-0.196189	1.32032e-66	0.955	0.925	2.49581e-62	1.87266	2.00143	prefoldin 5 [Source:MGI Symbol;Acc:MGI:1928753]
Scd2	-0.408547	5.78275e-66	0.547	0.547	1.09311e-61	0.641605	0.897419	stearoyl-Coenzyme A desaturase 2 [Source:MGI Symbol;Acc:MGI:98240]
Mid1ip1	-0.376674	9.75609e-65	0.629	0.623	1.84419e-60	0.836223	1.08816	Mid1 interacting protein 1 (gastrulation specific G12-like (zebrafish)) [Source:MGI Symbol;Acc:MGI:1915291]
Myh7	-0.303025	6.82268e-64	0.079	0.17	1.28969e-59	0.0745278	0.232093	myosin, heavy polypeptide 7, cardiac muscle, beta [Source:MGI Symbol;Acc:MGI:2155600]
Calr	0.18876	1.98327e-60	0.711	0.488	3.74897e-56	1.01217	0.752574	calreticulin [Source:MGI Symbol;Acc:MGI:88252]
Ier2	-0.516866	1.60524e-59	0.401	0.451	3.03438e-55	0.460126	0.747476	immediate early response 2 [Source:MGI Symbol;Acc:MGI:104815]
Fkbp4	-0.34288	1.50928e-58	0.544	0.533	2.85299e-54	0.606791	0.819211	FK506 binding protein 4 [Source:MGI Symbol;Acc:MGI:95543]
Slc31a1	-0.409215	9.1301e-57	0.301	0.363	1.72586e-52	0.29161	0.526778	solute carrier family 31, member 1 [Source:MGI Symbol;Acc:MGI:1333843]
Mgst1	-0.198463	2.46681e-56	0.917	0.881	4.66302e-52	1.68601	1.82647	microsomal glutathione S-transferase 1 [Source:MGI Symbol;Acc:MGI:1913850]
Junb	-0.6102	3.73613e-56	0.449	0.487	7.0624e-52	0.550484	0.862179	jun B proto-oncogene [Source:MGI Symbol;Acc:MGI:96647]
Hes1	-0.492232	4.74351e-56	0.224	0.312	8.96667e-52	0.245914	0.492401	hes family bHLH transcription factor 1 [Source:MGI Symbol;Acc:MGI:104853]
Rhob	-0.389567	8.4931e-56	0.145	0.234	1.60545e-51	0.141781	0.339713	ras homolog family member B [Source:MGI Symbol;Acc:MGI:107949]
Srsf5	-0.325621	1.29455e-55	0.557	0.545	2.44708e-51	0.632103	0.835962	serine/arginine-rich splicing factor 5 [Source:MGI Symbol;Acc:MGI:98287]
Gm11808	-0.286932	6.53832e-54	0.728	0.663	1.23594e-49	0.930812	1.09372	predicted gene 11808 [Source:MGI Symbol;Acc:MGI:3649356]
Sult1a1	-0.291957	1.02874e-51	0.101	0.183	1.94462e-47	0.0932054	0.246938	sulfotransferase family 1A, phenol-preferring, member 1 [Source:MGI Symbol;Acc:MGI:102896]
Hsp90aa1	-0.321492	1.22031e-50	0.778	0.728	2.30675e-46	1.17536	1.36671	heat shock protein 90, alpha (cytosolic), class A member 1 [Source:MGI Symbol;Acc:MGI:96250]
Camk2n1	-0.366608	5.75285e-50	0.296	0.357	1.08746e-45	0.297551	0.511498	calcium/calmodulin-dependent protein kinase II inhibitor 1 [Source:MGI Symbol;Acc:MGI:1913509]
Cebpa	-0.363646	3.68382e-49	0.395	0.431	6.96353e-45	0.423668	0.644465	CCAAT/enhancer binding protein (C/EBP), alpha [Source:MGI Symbol;Acc:MGI:99480]
Fabp12	-0.236936	2.8752e-46	0.061	0.13	5.43499e-42	0.0552715	0.173711	fatty acid binding protein 12 [Source:MGI Symbol;Acc:MGI:1922747]
Tppp3	-0.305659	9.7436e-46	0.499	0.304	1.84183e-41	0.634514	0.526421	tubulin polymerization-promoting protein family member 3 [Source:MGI Symbol;Acc:MGI:1915221]
Slc38a2	-0.261826	4.81938e-45	0.097	0.173	9.11007e-41	0.0910167	0.229407	solute carrier family 38, member 2 [Source:MGI Symbol;Acc:MGI:1915010]
Insig1	-0.385141	9.79509e-44	0.222	0.294	1.85157e-39	0.232977	0.439957	insulin induced gene 1 [Source:MGI Symbol;Acc:MGI:1916289]
Hist1h2bc	-0.202184	1.46583e-43	0.461	0.519	2.77086e-39	0.643038	0.858089	histone cluster 1, H2bc [Source:MGI Symbol;Acc:MGI:1915274]
Vpreb3	-0.270698	1.43759e-42	0.108	0.185	2.71747e-38	0.121681	0.27053	pre-B lymphocyte gene 3 [Source:MGI Symbol;Acc:MGI:98938]
Use1	-0.294465	6.83604e-41	0.617	0.571	1.29222e-36	0.724682	0.891745	unconventional SNARE in the ER 1 homolog (S. cerevisiae) [Source:MGI Symbol;Acc:MGI:1914273]
mt-Atp8	-0.328631	1.63809e-40	0.356	0.389	3.09648e-36	0.36403	0.558798	mitochondrially encoded ATP synthase 8 [Source:MGI Symbol;Acc:MGI:99926]
Anpep	-0.300174	1.04242e-39	0.171	0.241	1.97048e-35	0.166822	0.331454	alanyl (membrane) aminopeptidase [Source:MGI Symbol;Acc:MGI:5000466]
Oat	-0.264583	2.37287e-39	0.672	0.613	4.48544e-35	0.837868	0.984653	ornithine aminotransferase [Source:MGI Symbol;Acc:MGI:97394]
Limch1	-0.56158	1.83053e-38	0.159	0.225	3.46024e-34	0.153506	0.371581	LIM and calponin homology domains 1 [Source:MGI Symbol;Acc:MGI:1924819]
Aplp2	-0.279899	2.22992e-38	0.638	0.586	4.21521e-34	0.768347	0.925935	amyloid beta (A4) precursor-like protein 2 [Source:MGI Symbol;Acc:MGI:88047]
App	-0.249115	2.30235e-38	0.752	0.671	4.35213e-34	0.998515	1.12759	amyloid beta (A4) precursor protein [Source:MGI Symbol;Acc:MGI:88059]
Zfos1	-0.274914	3.48515e-37	0.566	0.547	6.58798e-33	0.692537	0.870901	NA
Etv5	-0.320192	4.30557e-37	0.571	0.532	8.13882e-33	0.674317	0.851808	ets variant 5 [Source:MGI Symbol;Acc:MGI:1096867]
Timp3	-0.441694	1.38053e-36	0.209	0.274	2.60961e-32	0.227184	0.435631	tissue inhibitor of metalloproteinase 3 [Source:MGI Symbol;Acc:MGI:98754]
Npc1	-0.317712	3.84736e-35	0.223	0.279	7.27267e-31	0.217651	0.390232	NPC intracellular cholesterol transporter 1 [Source:MGI Symbol;Acc:MGI:1097712]
Son	-0.243766	8.09928e-35	0.709	0.636	1.53101e-30	0.904272	1.03305	Son DNA binding protein [Source:MGI Symbol;Acc:MGI:98353]
Cebpb	-0.504687	6.33534e-34	0.428	0.433	1.19757e-29	0.474309	0.708986	CCAAT/enhancer binding protein (C/EBP), beta [Source:MGI Symbol;Acc:MGI:88373]
Gm2000	-0.283072	2.45844e-32	0.527	0.497	4.64719e-28	0.584256	0.742546	predicted gene 2000 [Source:MGI Symbol;Acc:MGI:3780170]
Gadd45b	-0.324382	3.55449e-32	0.161	0.224	6.71905e-28	0.163484	0.324239	growth arrest and DNA-damage-inducible 45 beta [Source:MGI Symbol;Acc:MGI:107776]
D230025D16Rik	-0.291982	7.31008e-32	0.193	0.248	1.38182e-27	0.180948	0.338301	RIKEN cDNA D230025D16 gene [Source:MGI Symbol;Acc:MGI:2443049]
Rpl23a-ps3	-0.292023	9.2739e-31	0.482	0.462	1.75305e-26	0.511775	0.674823	ribosomal protein L23A, pseudogene 3 [Source:MGI Symbol;Acc:MGI:3781353]
Lgals1	-0.630072	1.55572e-30	0.052	0.103	2.94077e-26	0.0623596	0.225929	lectin, galactose binding, soluble 1 [Source:MGI Symbol;Acc:MGI:96777]
Tinagl1	-0.276296	4.68816e-30	0.175	0.232	8.86202e-26	0.168386	0.315399	tubulointerstitial nephritis antigen-like 1 [Source:MGI Symbol;Acc:MGI:2137617]
Pmp22	-0.375948	7.74206e-30	0.068	0.121	1.46348e-25	0.0645005	0.198848	peripheral myelin protein 22 [Source:MGI Symbol;Acc:MGI:97631]
Rap1gap	-0.235773	2.72289e-29	0.094	0.149	5.14708e-25	0.085859	0.202122	Rap1 GTPase-activating protein [Source:MGI Symbol;Acc:MGI:109338]
Ldlr	-0.25124	3.48962e-29	0.115	0.173	6.59643e-25	0.109459	0.236346	low density lipoprotein receptor [Source:MGI Symbol;Acc:MGI:96765]
Arhgef38	-0.254367	1.09159e-28	0.118	0.175	2.06344e-24	0.109329	0.236672	Rho guanine nucleotide exchange factor (GEF) 38 [Source:MGI Symbol;Acc:MGI:1924919]
Pim3	-0.294559	4.76121e-28	0.268	0.309	9.00012e-24	0.271768	0.435138	proviral integration site 3 [Source:MGI Symbol;Acc:MGI:1355297]
Btg2	-0.348359	6.92479e-28	0.414	0.425	1.30899e-23	0.469109	0.654931	B cell translocation gene 2, anti-proliferative [Source:MGI Symbol;Acc:MGI:108384]
Epas1	-0.300192	1.54686e-27	0.265	0.304	2.92403e-23	0.2652	0.428904	endothelial PAS domain protein 1 [Source:MGI Symbol;Acc:MGI:109169]
Nop10	-0.189612	2.34928e-27	0.807	0.723	4.44085e-23	1.14808	1.23361	NOP10 ribonucleoprotein [Source:MGI Symbol;Acc:MGI:1913431]
Sord	-0.199197	2.68983e-27	0.081	0.134	5.08458e-23	0.0773481	0.17807	sorbitol dehydrogenase [Source:MGI Symbol;Acc:MGI:98266]
Foxp1	-0.309447	3.1393e-27	0.419	0.411	5.93422e-23	0.436263	0.603976	forkhead box P1 [Source:MGI Symbol;Acc:MGI:1914004]
Grcc10	-0.252119	7.36786e-27	0.603	0.544	1.39275e-22	0.70062	0.830874	gene rich cluster, C10 gene [Source:MGI Symbol;Acc:MGI:1315201]
Sec62	-0.230995	9.76756e-27	0.701	0.624	1.84636e-22	0.893242	1.00492	SEC62 homolog (S. cerevisiae) [Source:MGI Symbol;Acc:MGI:1916526]
Dhrs3	-0.286763	2.81031e-26	0.454	0.44	5.31232e-22	0.489472	0.647068	dehydrogenase/reductase (SDR family) member 3 [Source:MGI Symbol;Acc:MGI:1315215]
Gde1	-0.195438	1.21457e-25	0.762	0.689	2.2959e-21	1.06201	1.16113	glycerophosphodiester phosphodiesterase 1 [Source:MGI Symbol;Acc:MGI:1891827]
Acly	-0.305114	2.35674e-25	0.445	0.429	4.45494e-21	0.478074	0.642978	ATP citrate lyase [Source:MGI Symbol;Acc:MGI:103251]
Rps12-ps3	-0.274925	6.44453e-25	0.517	0.478	1.21821e-20	0.56727	0.71395	ribosomal protein S12, pseudogene 3 [Source:MGI Symbol;Acc:MGI:3704503]
Npnt	-0.368554	1.72229e-24	0.168	0.216	3.25564e-20	0.165473	0.327075	nephronectin [Source:MGI Symbol;Acc:MGI:2148811]
Slc6a6	-0.214011	2.26321e-24	0.097	0.148	4.27814e-20	0.093476	0.199664	solute carrier family 6 (neurotransmitter transporter, taurine), member 6 [Source:MGI Symbol;Acc:MGI:98488]
Degs1	-0.285312	6.58587e-24	0.34	0.355	1.24493e-19	0.344472	0.50107	delta(4)-desaturase, sphingolipid 1 [Source:MGI Symbol;Acc:MGI:1097711]
Gm8730	-0.205454	1.06931e-23	0.69	0.613	2.02131e-19	0.880945	0.981113	predicted pseudogene 8730 [Source:MGI Symbol;Acc:MGI:3644565]
Acot2	-0.247305	4.6403e-23	0.126	0.176	8.77157e-19	0.122523	0.242957	acyl-CoA thioesterase 2 [Source:MGI Symbol;Acc:MGI:2159605]
Aldh6a1	-0.194113	1.85012e-22	0.076	0.122	3.49728e-18	0.0682275	0.160953	aldehyde dehydrogenase family 6, subfamily A1 [Source:MGI Symbol;Acc:MGI:1915077]
Pmvk	-0.356786	2.43126e-22	0.511	0.485	4.59581e-18	0.630209	0.812803	phosphomevalonate kinase [Source:MGI Symbol;Acc:MGI:1915853]
Gsta3	-0.213868	2.06554e-21	0.065	0.108	3.90449e-17	0.056704	0.147174	glutathione S-transferase, alpha 3 [Source:MGI Symbol;Acc:MGI:95856]
Ppp1r15a	-0.206704	1.76325e-20	0.09	0.135	3.33307e-16	0.0838619	0.181157	protein phosphatase 1, regulatory subunit 15A [Source:MGI Symbol;Acc:MGI:1927072]
Tmem159	-0.285227	4.12301e-20	0.246	0.272	7.79373e-16	0.233493	0.377948	transmembrane protein 159 [Source:MGI Symbol;Acc:MGI:1925752]
Tcp11l2	-0.187321	8.17181e-20	0.08	0.123	1.54472e-15	0.0745139	0.163751	t-complex 11 (mouse) like 2 [Source:MGI Symbol;Acc:MGI:2444679]
Creg1	-0.233092	2.02702e-19	0.593	0.522	3.83168e-15	0.684789	0.793782	cellular repressor of E1A-stimulated genes 1 [Source:MGI Symbol;Acc:MGI:1344382]
Tuba1a	-0.437776	2.82444e-19	0.084	0.129	5.33904e-15	0.110141	0.254236	tubulin, alpha 1A [Source:MGI Symbol;Acc:MGI:98869]
Erdr1	-0.229747	5.79715e-19	0.136	0.179	1.09583e-14	0.13073	0.244181	NA
Lpl	-0.18416	9.35036e-19	0.088	0.131	1.7675e-14	0.0834334	0.174129	lipoprotein lipase [Source:MGI Symbol;Acc:MGI:96820]
Nedd4l	-0.188743	1.0349e-18	0.092	0.135	1.95628e-14	0.083508	0.175246	neural precursor cell expressed, developmentally down-regulated gene 4-like [Source:MGI Symbol;Acc:MGI:1933754]
Lpin2	-0.255191	2.53801e-18	0.238	0.267	4.7976e-14	0.235045	0.368732	lipin 2 [Source:MGI Symbol;Acc:MGI:1891341]
Notch2	-0.227617	7.42239e-18	0.107	0.149	1.40305e-13	0.105807	0.20952	notch 2 [Source:MGI Symbol;Acc:MGI:97364]
Lmo7	-0.253833	1.32732e-17	0.348	0.357	2.50903e-13	0.380669	0.522458	LIM domain only 7 [Source:MGI Symbol;Acc:MGI:1353586]
Spop	-0.249102	2.84638e-17	0.168	0.204	5.38052e-13	0.159215	0.28166	speckle-type BTB/POZ protein [Source:MGI Symbol;Acc:MGI:1343085]
Cadm1	-0.246235	7.82417e-17	0.501	0.456	1.479e-12	0.55496	0.679502	cell adhesion molecule 1 [Source:MGI Symbol;Acc:MGI:1889272]
Por	-0.243823	9.68975e-17	0.274	0.294	1.83165e-12	0.279908	0.411886	P450 (cytochrome) oxidoreductase [Source:MGI Symbol;Acc:MGI:97744]
Fasn	-0.232477	6.38757e-16	0.662	0.583	1.20744e-11	0.863991	0.96794	fatty acid synthase [Source:MGI Symbol;Acc:MGI:95485]
Swt1	-0.267022	2.66465e-15	0.492	0.445	5.03698e-11	0.543504	0.671551	SWT1 RNA endoribonuclease homolog (S. cerevisiae) [Source:MGI Symbol;Acc:MGI:1914125]
Npr1	-0.207474	3.39953e-15	0.132	0.168	6.42613e-11	0.124117	0.224505	natriuretic peptide receptor 1 [Source:MGI Symbol;Acc:MGI:97371]
Tob1	-0.235897	4.43432e-15	0.182	0.214	8.38219e-11	0.177213	0.293388	transducer of ErbB-2.1 [Source:MGI Symbol;Acc:MGI:1349721]
Cyp2f2	-0.362234	4.60909e-15	0.138	0.178	8.71255e-11	0.16998	0.304805	cytochrome P450, family 2, subfamily f, polypeptide 2 [Source:MGI Symbol;Acc:MGI:88608]
Ypel3	-0.263239	4.97829e-15	0.394	0.376	9.41046e-11	0.412154	0.545047	yippee like 3 [Source:MGI Symbol;Acc:MGI:1913340]
Serinc3	-0.255121	6.65324e-15	0.247	0.266	1.25766e-10	0.240595	0.368912	serine incorporator 3 [Source:MGI Symbol;Acc:MGI:1349457]
Klf6	-0.353044	1.34046e-14	0.29	0.307	2.53387e-10	0.324881	0.480323	Kruppel-like factor 6 [Source:MGI Symbol;Acc:MGI:1346318]
Ahnak	-0.267602	1.68269e-14	0.21	0.236	3.18079e-10	0.20831	0.336325	AHNAK nucleoprotein (desmoyokin) [Source:MGI Symbol;Acc:MGI:1316648]
Mecom	-0.25987	3.88076e-14	0.358	0.348	7.33581e-10	0.36738	0.498591	MDS1 and EVI1 complex locus [Source:MGI Symbol;Acc:MGI:95457]
Rpl13-ps3	-0.255817	7.98252e-14	0.355	0.344	1.50894e-09	0.35814	0.486685	ribosomal protein L13, pseudogene 3 [Source:MGI Symbol;Acc:MGI:3646682]
Rbms3	-0.23638	8.20369e-14	0.158	0.19	1.55074e-09	0.15315	0.263866	RNA binding motif, single stranded interacting protein [Source:MGI Symbol;Acc:MGI:2444477]
Birc6	-0.229419	1.11772e-13	0.174	0.203	2.11283e-09	0.165383	0.276059	baculoviral IAP repeat-containing 6 [Source:MGI Symbol;Acc:MGI:1276108]
Cdk2ap2	-0.210867	2.09281e-13	0.612	0.533	3.95603e-09	0.7326	0.821543	CDK2-associated protein 2 [Source:MGI Symbol;Acc:MGI:1098779]
Tra2b	-0.242805	2.11323e-13	0.492	0.444	3.99463e-09	0.547718	0.664033	transformer 2 beta [Source:MGI Symbol;Acc:MGI:106016]
Txlng	-0.207362	2.95067e-13	0.138	0.169	5.57765e-09	0.124823	0.223963	taxilin gamma [Source:MGI Symbol;Acc:MGI:3590652]
AY036118	-0.239031	3.79902e-13	0.209	0.231	7.18129e-09	0.193789	0.31002	cDNA sequence AY036118 [Source:MGI Symbol;Acc:MGI:2158419]
Macf1	-0.208682	2.16801e-12	0.268	0.181	4.09819e-08	0.267771	0.282042	microtubule-actin crosslinking factor 1 [Source:MGI Symbol;Acc:MGI:108559]
Ank3	-0.249204	2.79856e-12	0.412	0.385	5.29011e-08	0.440297	0.561701	ankyrin 3, epithelial [Source:MGI Symbol;Acc:MGI:88026]
Dnajb2	-0.206514	5.69198e-12	0.134	0.164	1.07595e-07	0.126199	0.22289	DnaJ heat shock protein family (Hsp40) member B2 [Source:MGI Symbol;Acc:MGI:1928739]
Tsc22d1	-0.265948	1.10011e-11	0.611	0.531	2.07954e-07	0.751446	0.853973	TSC22 domain family, member 1 [Source:MGI Symbol;Acc:MGI:109127]
Foxa1	-0.188325	1.93389e-11	0.133	0.163	3.65563e-07	0.125841	0.215942	forkhead box A1 [Source:MGI Symbol;Acc:MGI:1347472]
Gstp1	-0.255125	1.95195e-11	0.487	0.428	3.68976e-07	0.519008	0.629142	glutathione S-transferase, pi 1 [Source:MGI Symbol;Acc:MGI:95865]
Ppp1r9a	-0.25114	2.65879e-11	0.279	0.283	5.02591e-07	0.278649	0.400097	protein phosphatase 1, regulatory subunit 9A [Source:MGI Symbol;Acc:MGI:2442401]
PISD	-0.258589	2.70376e-11	0.197	0.22	5.11091e-07	0.197205	0.312537	NA
Hnrnph1	-0.238014	3.43854e-11	0.325	0.319	6.49986e-07	0.327516	0.44598	heterogeneous nuclear ribonucleoprotein H1 [Source:MGI Symbol;Acc:MGI:1891925]
Prps2	-0.236467	5.91066e-11	0.235	0.247	1.11729e-06	0.225353	0.339503	phosphoribosyl pyrophosphate synthetase 2 [Source:MGI Symbol;Acc:MGI:97776]
Pnrc1	-0.26521	7.01237e-11	0.381	0.359	1.32555e-06	0.399604	0.523626	proline-rich nuclear receptor coactivator 1 [Source:MGI Symbol;Acc:MGI:1917838]
Exosc7	-0.205143	7.2525e-11	0.633	0.549	1.37094e-06	0.784838	0.865492	exosome component 7 [Source:MGI Symbol;Acc:MGI:1913696]
Dnaja1	-0.222813	2.01953e-10	0.592	0.512	3.81751e-06	0.704882	0.792543	DnaJ heat shock protein family (Hsp40) member A1 [Source:MGI Symbol;Acc:MGI:1270129]
Chchd7	-0.186087	2.10664e-10	0.128	0.154	3.98218e-06	0.117246	0.20316	coiled-coil-helix-coiled-coil-helix domain containing 7 [Source:MGI Symbol;Acc:MGI:1913683]
Ier3	-0.268035	3.43773e-10	0.19	0.213	6.49834e-06	0.197023	0.30997	immediate early response 3 [Source:MGI Symbol;Acc:MGI:104814]
Myh14	-0.221151	3.65198e-10	0.286	0.289	6.90334e-06	0.291192	0.40146	myosin, heavy polypeptide 14 [Source:MGI Symbol;Acc:MGI:1919210]
Tmsb10	-0.452059	4.4992e-10	0.726	0.658	8.50485e-06	1.18677	1.32699	thymosin, beta 10 [Source:MGI Symbol;Acc:MGI:109146]
Sod1	-0.218656	1.05852e-09	0.532	0.461	2.00092e-05	0.5945	0.686956	superoxide dismutase 1, soluble [Source:MGI Symbol;Acc:MGI:98351]
Gstm2	-0.233442	1.376e-09	0.082	0.108	2.60105e-05	0.0764454	0.161806	glutathione S-transferase, mu 2 [Source:MGI Symbol;Acc:MGI:95861]
Elof1	-0.182462	1.38832e-09	0.434	0.305	2.62434e-05	0.480191	0.472947	ELF1 homolog, elongation factor 1 [Source:MGI Symbol;Acc:MGI:1913376]
Socs3	-0.294472	1.73696e-09	0.137	0.163	3.28338e-05	0.137918	0.242973	suppressor of cytokine signaling 3 [Source:MGI Symbol;Acc:MGI:1201791]
Rprm	-0.193168	2.29915e-09	0.144	0.167	4.34608e-05	0.135726	0.224496	reprimo, TP53 dependent G2 arrest mediator candidate [Source:MGI Symbol;Acc:MGI:1915124]
Zbtb20	-0.264416	2.78005e-09	0.273	0.274	5.25512e-05	0.279177	0.398862	zinc finger and BTB domain containing 20 [Source:MGI Symbol;Acc:MGI:1929213]
Rbp1	-0.241208	3.11616e-09	0.164	0.114	5.89048e-05	0.178086	0.205639	retinol binding protein 1, cellular [Source:MGI Symbol;Acc:MGI:97876]
Ing2	-0.191881	4.02123e-09	0.138	0.161	7.60132e-05	0.127047	0.214855	inhibitor of growth family, member 2 [Source:MGI Symbol;Acc:MGI:1916510]
Ddrgk1	-0.219197	5.05793e-09	0.417	0.377	9.56101e-05	0.431389	0.531887	DDRGK domain containing 1 [Source:MGI Symbol;Acc:MGI:1924256]
Rpl9-ps6	-0.227182	5.07898e-09	0.348	0.327	9.6008e-05	0.346868	0.45383	ribosomal protein L9, pseudogene 6 [Source:MGI Symbol;Acc:MGI:3642682]
Btg1	-0.194852	1.02473e-08	0.508	0.46	0.000193705	0.612075	0.707896	B cell translocation gene 1, anti-proliferative [Source:MGI Symbol;Acc:MGI:88215]
Atp6v1c2	-0.227791	1.11162e-08	0.295	0.29	0.000210129	0.296517	0.403935	ATPase, H+ transporting, lysosomal V1 subunit C2 [Source:MGI Symbol;Acc:MGI:1916025]
Spry1	-0.222147	1.37037e-08	0.194	0.208	0.000259041	0.18807	0.290194	sprouty RTK signaling antagonist 1 [Source:MGI Symbol;Acc:MGI:1345139]
Plekhb1	-0.20604	2.27911e-08	0.208	0.22	0.000430821	0.199827	0.296345	pleckstrin homology domain containing, family B (evectins) member 1 [Source:MGI Symbol;Acc:MGI:1351469]
Mylk	-0.238221	2.45878e-08	0.255	0.257	0.000464784	0.254343	0.365594	myosin, light polypeptide kinase [Source:MGI Symbol;Acc:MGI:894806]
P4ha1	-0.211565	2.97342e-08	0.213	0.226	0.000562066	0.21366	0.312863	procollagen-proline, 2-oxoglutarate 4-dioxygenase (proline 4-hydroxylase), alpha 1 polypeptide [Source:MGI Symbol;Acc:MGI:97463]
Slc9a3r2	-0.199997	3.9037e-08	0.198	0.211	0.000737916	0.188845	0.283184	solute carrier family 9 (sodium/hydrogen exchanger), member 3 regulator 2 [Source:MGI Symbol;Acc:MGI:1890662]
Rbp4	-0.24236	6.56197e-08	0.123	0.145	0.00124041	0.115486	0.204751	retinol binding protein 4, plasma [Source:MGI Symbol;Acc:MGI:97879]
Nucb2	-0.215964	8.30369e-08	0.447	0.399	0.00156965	0.487104	0.583436	nucleobindin 2 [Source:MGI Symbol;Acc:MGI:1858179]
Ifitm2	-0.269297	9.39115e-08	0.707	0.515	0.00177521	0.913898	0.864745	interferon induced transmembrane protein 2 [Source:MGI Symbol;Acc:MGI:1933382]
Zfp36l1	-0.198823	1.17822e-07	0.559	0.486	0.0022272	0.669281	0.751886	zinc finger protein 36, C3H type-like 1 [Source:MGI Symbol;Acc:MGI:107946]
Tuba1b	0.214895	2.09196e-07	0.474	0.378	0.00395443	0.670275	0.575548	tubulin, alpha 1B [Source:MGI Symbol;Acc:MGI:107804]
Pdlim2	-0.225001	2.1026e-07	0.231	0.235	0.00397455	0.224775	0.326636	PDZ and LIM domain 2 [Source:MGI Symbol;Acc:MGI:2384850]
Psap	-0.224044	2.53728e-07	0.145	0.163	0.00479621	0.141241	0.23463	prosaposin [Source:MGI Symbol;Acc:MGI:97783]
Mlc1	-0.210009	3.22155e-07	0.347	0.323	0.00608969	0.354728	0.452817	megalencephalic leukoencephalopathy with subcortical cysts 1 homolog (human) [Source:MGI Symbol;Acc:MGI:2157910]
Rasl11a	-0.23947	4.9133e-07	0.331	0.322	0.0092876	0.374372	0.483509	RAS-like, family 11, member A [Source:MGI Symbol;Acc:MGI:1916145]
Ptprf	-0.194893	1.94698e-06	0.613	0.506	0.0368038	0.731808	0.792725	protein tyrosine phosphatase, receptor type, F [Source:MGI Symbol;Acc:MGI:102695]
St13	-0.217883	2.10154e-06	0.498	0.43	0.0397254	0.554172	0.640347	suppression of tumorigenicity 13 [Source:MGI Symbol;Acc:MGI:1917606]
Secisbp2l	-0.223161	2.107e-06	0.367	0.336	0.0398286	0.383632	0.483097	SECIS binding protein 2-like [Source:MGI Symbol;Acc:MGI:1917604]

## Sheet: KO HDM vs WT HDM updated
Gene	avg_logFC	p_val	pct.1	pct.2	p_val_adj	mean.KO.HDM	mean.WT.HDM	Gene.description
Areg	0.546618	5.37712e-143	0.404	0.223	1.01644e-138	0.592848	0.261186	amphiregulin [Source:MGI Symbol;Acc:MGI:88068]
Mt1	0.480492	3.4764e-156	0.969	0.944	6.57144e-152	2.72999	2.24051	metallothionein 1 [Source:MGI Symbol;Acc:MGI:97171]
Mt2	0.460504	1.73828e-127	0.839	0.732	3.28587e-123	1.7937	1.3239	metallothionein 2 [Source:MGI Symbol;Acc:MGI:97172]
Clu	0.439249	3.82068e-168	0.833	0.726	7.22223e-164	1.48908	1.07222	clusterin [Source:MGI Symbol;Acc:MGI:88423]
Malat1	0.379584	5.11567e-172	1	1	9.67015e-168	5.17974	4.81332	metastasis associated lung adenocarcinoma transcript 1 (non-coding RNA) [Source:MGI Symbol;Acc:MGI:1919539]
Scgb1a1	0.370445	0	1	1	0	3.68444	3.32615	secretoglobin, family 1A, member 1 (uteroglobin) [Source:MGI Symbol;Acc:MGI:98919]
Zfp36	0.339942	7.34615e-155	0.559	0.374	1.38864e-150	0.651467	0.371016	zinc finger protein 36 [Source:MGI Symbol;Acc:MGI:99180]
Errfi1	0.334605	4.91741e-113	0.73	0.624	9.29538e-109	1.04921	0.758335	ERBB receptor feedback inhibitor 1 [Source:MGI Symbol;Acc:MGI:1921405]
Sprr1a	0.320797	2.6202e-19	0.101	0.061	4.95296e-15	0.150834	0.0746061	small proline-rich protein 1A [Source:MGI Symbol;Acc:MGI:106660]
Txnip	0.297167	1.50611e-79	0.592	0.489	2.847e-75	0.743251	0.519097	thioredoxin interacting protein [Source:MGI Symbol;Acc:MGI:1889549]
Tppp3	0.293435	2.49723e-40	0.499	0.418	4.72051e-36	0.634514	0.460071	tubulin polymerization-promoting protein family member 3 [Source:MGI Symbol;Acc:MGI:1915221]
Chka	0.292871	9.11614e-63	0.518	0.423	1.72322e-58	0.635857	0.434334	choline kinase alpha [Source:MGI Symbol;Acc:MGI:107760]
Cd24a	0.28975	4.39084e-34	0.33	0.244	8.30001e-30	0.439356	0.292127	CD24a antigen [Source:MGI Symbol;Acc:MGI:88323]
H3f3b	0.28967	9.61324e-259	0.999	0.998	1.81719e-254	3.10496	2.81135	H3 histone, family 3B [Source:MGI Symbol;Acc:MGI:1101768]
Krt18	0.242958	2.56426e-50	0.78	0.734	4.84721e-46	1.21794	1.01835	keratin 18 [Source:MGI Symbol;Acc:MGI:96692]
Cirbp	0.24211	9.66051e-85	0.421	0.286	1.82613e-80	0.438218	0.2585	cold inducible RNA binding protein [Source:MGI Symbol;Acc:MGI:893588]
Hist1h1c	0.234551	1.87327e-46	0.301	0.205	3.54105e-42	0.354428	0.211851	histone cluster 1, H1c [Source:MGI Symbol;Acc:MGI:1931526]
Actg1	0.232088	6.95645e-115	0.993	0.987	1.31498e-110	2.82953	2.58765	actin, gamma, cytoplasmic 1 [Source:MGI Symbol;Acc:MGI:87906]
Dcxr	0.229831	7.74746e-79	0.856	0.825	1.4645e-74	1.3797	1.17056	dicarbonyl L-xylulose reductase [Source:MGI Symbol;Acc:MGI:1915130]
Krt19	0.226916	1.31931e-33	0.41	0.331	2.49389e-29	0.500307	0.357024	keratin 19 [Source:MGI Symbol;Acc:MGI:96693]
Krt7	0.223538	1.96162e-25	0.564	0.514	3.70804e-21	0.751991	0.605087	keratin 7 [Source:MGI Symbol;Acc:MGI:96704]
Apoc1	0.218611	2.72749e-24	0.757	0.726	5.15577e-20	1.363	1.19175	apolipoprotein C-I [Source:MGI Symbol;Acc:MGI:88053]
C2cd4b	0.215834	3.71964e-37	0.298	0.216	7.03124e-33	0.345013	0.215008	C2 calcium-dependent domain containing 4B [Source:MGI Symbol;Acc:MGI:1922947]
Tsc22d1	0.211775	6.01586e-56	0.611	0.525	1.13718e-51	0.751446	0.573399	TSC22 domain family, member 1 [Source:MGI Symbol;Acc:MGI:109127]
Serpinb6b	0.207083	3.99369e-33	0.794	0.772	7.54927e-29	1.30341	1.14284	serine (or cysteine) peptidase inhibitor, clade B, member 6b [Source:MGI Symbol;Acc:MGI:894688]
Tmsb4x	0.206325	1.42696e-138	1	1	2.69738e-134	5.1811	5.00684	thymosin, beta 4, X chromosome [Source:MGI Symbol;Acc:MGI:99510]
Sox9	0.20468	3.90751e-49	0.303	0.204	7.38636e-45	0.335607	0.20066	SRY (sex determining region Y)-box 9 [Source:MGI Symbol;Acc:MGI:98371]
S100a1	0.19939	9.84444e-45	0.897	0.896	1.86089e-40	1.57697	1.42432	S100 calcium binding protein A1 [Source:MGI Symbol;Acc:MGI:1338917]
Btg2	0.195024	2.11431e-33	0.414	0.344	3.99668e-29	0.469109	0.336948	B cell translocation gene 2, anti-proliferative [Source:MGI Symbol;Acc:MGI:108384]
Phlda1	0.19268	1.83237e-17	0.725	0.716	3.46374e-13	1.15831	1.0316	pleckstrin homology like domain, family A, member 1 [Source:MGI Symbol;Acc:MGI:1096880]
Dusp1	0.189421	6.38843e-38	0.418	0.329	1.20761e-33	0.488163	0.350113	dual specificity phosphatase 1 [Source:MGI Symbol;Acc:MGI:105120]
Anxa1	0.187796	1.92081e-18	0.573	0.533	3.63091e-14	0.770025	0.647262	annexin A1 [Source:MGI Symbol;Acc:MGI:96819]
Tcea3	0.185674	7.42909e-38	0.432	0.349	1.40432e-33	0.479728	0.346104	transcription elongation factor A (SII), 3 [Source:MGI Symbol;Acc:MGI:1196908]
Cdkn1a	0.185007	6.72657e-17	0.301	0.247	1.27152e-12	0.388012	0.288043	cyclin-dependent kinase inhibitor 1A (P21) [Source:MGI Symbol;Acc:MGI:104556]
Psmb8	-0.183444	3.54706e-57	0.653	0.756	6.70501e-53	0.839521	1.03457	proteasome (prosome, macropain) subunit, beta type 8 (large multifunctional peptidase 7) [Source:MGI Symbol;Acc:MGI:1346527]
Dnaja1	-0.184871	1.12925e-68	0.592	0.732	2.13463e-64	0.704882	0.907752	DnaJ heat shock protein family (Hsp40) member A1 [Source:MGI Symbol;Acc:MGI:1270129]
H2-Q7	-0.187769	4.25707e-54	0.728	0.817	8.04714e-50	1.07955	1.29073	histocompatibility 2, Q region locus 7 [Source:MGI Symbol;Acc:MGI:95936]
Acot7	-0.187785	1.53745e-61	0.782	0.869	2.90625e-57	1.19118	1.41221	acyl-CoA thioesterase 7 [Source:MGI Symbol;Acc:MGI:1917275]
Gm11744	-0.188104	2.74812e-65	0.312	0.455	5.19478e-61	0.320715	0.480395	NA
Xbp1	-0.190547	5.68286e-74	0.294	0.445	1.07423e-69	0.289983	0.450984	X-box binding protein 1 [Source:MGI Symbol;Acc:MGI:98970]
Krtcap2	-0.192139	3.52063e-92	0.853	0.925	6.65504e-88	1.28682	1.51432	keratinocyte associated protein 2 [Source:MGI Symbol;Acc:MGI:1913309]
Ube2c	-0.196769	2.03275e-24	0.161	0.233	3.84251e-20	0.234535	0.334736	ubiquitin-conjugating enzyme E2C [Source:MGI Symbol;Acc:MGI:1915862]
Fdps	-0.196894	7.56011e-52	0.479	0.601	1.42909e-47	0.582404	0.767198	farnesyl diphosphate synthetase [Source:MGI Symbol;Acc:MGI:104888]
Creld2	-0.201366	9.41052e-94	0.233	0.401	1.77887e-89	0.225988	0.391948	cysteine-rich with EGF-like domains 2 [Source:MGI Symbol;Acc:MGI:1923987]
Pim1	-0.204107	1.96817e-81	0.209	0.361	3.72042e-77	0.218467	0.376754	proviral integration site 1 [Source:MGI Symbol;Acc:MGI:97584]
Stmn1	-0.210575	1.02956e-35	0.656	0.755	1.94618e-31	1.07912	1.29771	stathmin 1 [Source:MGI Symbol;Acc:MGI:96739]
Scd1	-0.210904	8.53811e-74	0.964	0.985	1.61396e-69	2.39881	2.66521	stearoyl-Coenzyme A desaturase 1 [Source:MGI Symbol;Acc:MGI:98239]
Ifitm3	-0.211289	8.06719e-31	0.675	0.752	1.52494e-26	1.00262	1.18352	interferon induced transmembrane protein 3 [Source:MGI Symbol;Acc:MGI:1913391]
Dnajb9	-0.214558	3.0614e-111	0.166	0.334	5.78697e-107	0.159508	0.325141	DnaJ heat shock protein family (Hsp40) member B9 [Source:MGI Symbol;Acc:MGI:1351618]
Vimp	-0.214834	9.42312e-87	0.638	0.779	1.78125e-82	0.791078	1.02723	NA
Isg15	-0.218828	3.89402e-36	0.138	0.22	7.36086e-32	0.144992	0.247777	ISG15 ubiquitin-like modifier [Source:MGI Symbol;Acc:MGI:1855694]
Rasl11a	-0.229035	5.302e-82	0.331	0.495	1.00224e-77	0.374372	0.574176	RAS-like, family 11, member A [Source:MGI Symbol;Acc:MGI:1916145]
H2afz	-0.241346	2.1661e-65	0.936	0.969	4.09458e-61	2.00278	2.27485	H2A histone family, member Z [Source:MGI Symbol;Acc:MGI:1888388]
Cxcl5	-0.242474	1.53906e-69	0.036	0.117	2.90928e-65	0.0414428	0.140646	chemokine (C-X-C motif) ligand 5 [Source:MGI Symbol;Acc:MGI:1096868]
Chil1	-0.246452	4.63452e-154	0.996	0.998	8.76062e-150	3.59082	3.88922	chitinase-like 1 [Source:MGI Symbol;Acc:MGI:1340899]
Fabp5	-0.2487	2.54036e-86	0.943	0.976	4.80204e-82	2.29352	2.61638	fatty acid binding protein 5, epidermal [Source:MGI Symbol;Acc:MGI:101790]
Hspa5	-0.249386	3.65058e-92	0.629	0.764	6.90069e-88	0.848311	1.11818	heat shock protein 5 [Source:MGI Symbol;Acc:MGI:95835]
Mid1ip1	-0.250782	4.3173e-94	0.629	0.766	8.161e-90	0.836223	1.10414	Mid1 interacting protein 1 (gastrulation specific G12-like (zebrafish)) [Source:MGI Symbol;Acc:MGI:1915291]
Lcn2	-0.256076	2.52589e-85	0.989	0.997	4.77469e-81	3.30461	3.59565	lipocalin 2 [Source:MGI Symbol;Acc:MGI:96757]
Hp	-0.263751	6.64421e-113	0.733	0.857	1.25596e-108	1.15071	1.4822	haptoglobin [Source:MGI Symbol;Acc:MGI:96211]
Rnase4	-0.269472	6.08766e-100	0.681	0.816	1.15075e-95	0.997014	1.29497	ribonuclease, RNase A family 4 [Source:MGI Symbol;Acc:MGI:1926217]
Slpi	-0.269611	3.75994e-85	0.759	0.869	7.10742e-81	1.26325	1.57072	secretory leukocyte peptidase inhibitor [Source:MGI Symbol;Acc:MGI:109297]
Sdf2l1	-0.292843	1.19001e-133	0.207	0.397	2.24947e-129	0.205404	0.423052	stromal cell-derived factor 2-like 1 [Source:MGI Symbol;Acc:MGI:2149842]
Hspa8	-0.294437	5.80155e-193	0.922	0.968	1.09667e-188	1.6675	2.00115	heat shock protein 8 [Source:MGI Symbol;Acc:MGI:105384]
Cxcl1	-0.296813	1.89915e-88	0.056	0.163	3.58997e-84	0.0638037	0.196819	chemokine (C-X-C motif) ligand 1 [Source:MGI Symbol;Acc:MGI:108068]
Id2	-0.306041	1.58628e-146	0.74	0.87	2.99854e-142	1.11625	1.47096	inhibitor of DNA binding 2 [Source:MGI Symbol;Acc:MGI:96397]
Pfn1	-0.326789	4.91881e-190	0.709	0.86	9.29802e-186	0.942301	1.29947	profilin 1 [Source:MGI Symbol;Acc:MGI:97549]
Manf	-0.424384	1.11568e-223	0.681	0.851	2.10896e-219	0.948284	1.38638	mesencephalic astrocyte-derived neurotrophic factor [Source:MGI Symbol;Acc:MGI:1922090]
Lrg1	-0.489589	1.61798e-232	0.736	0.898	3.05847e-228	1.2687	1.82803	leucine-rich alpha-2-glycoprotein 1 [Source:MGI Symbol;Acc:MGI:1924155]
Ifi27l2a	-0.508807	1.79015e-203	0.703	0.883	3.38392e-199	1.27407	1.85791	interferon, alpha-inducible protein 27 like 2A [Source:MGI Symbol;Acc:MGI:1924183]
Ly6i	-0.526541	2.26927e-222	0.595	0.813	4.2896e-218	0.908422	1.44194	lymphocyte antigen 6 complex, locus I [Source:MGI Symbol;Acc:MGI:1888480]
Mgp	-0.589718	7.99051e-96	0.133	0.281	1.51045e-91	0.146898	0.308749	matrix Gla protein [Source:MGI Symbol;Acc:MGI:96976]
