# Supplementary figures and images for: Single-Cell RNA-Seq Analysis Reveals Lung Epithelial Cell Type-Specific Responses to HDM and Regulation by Tet1
Source: MDPI journal article supplement (doi:10.3390/genes13050880), 2022-05-14

**A****All groups**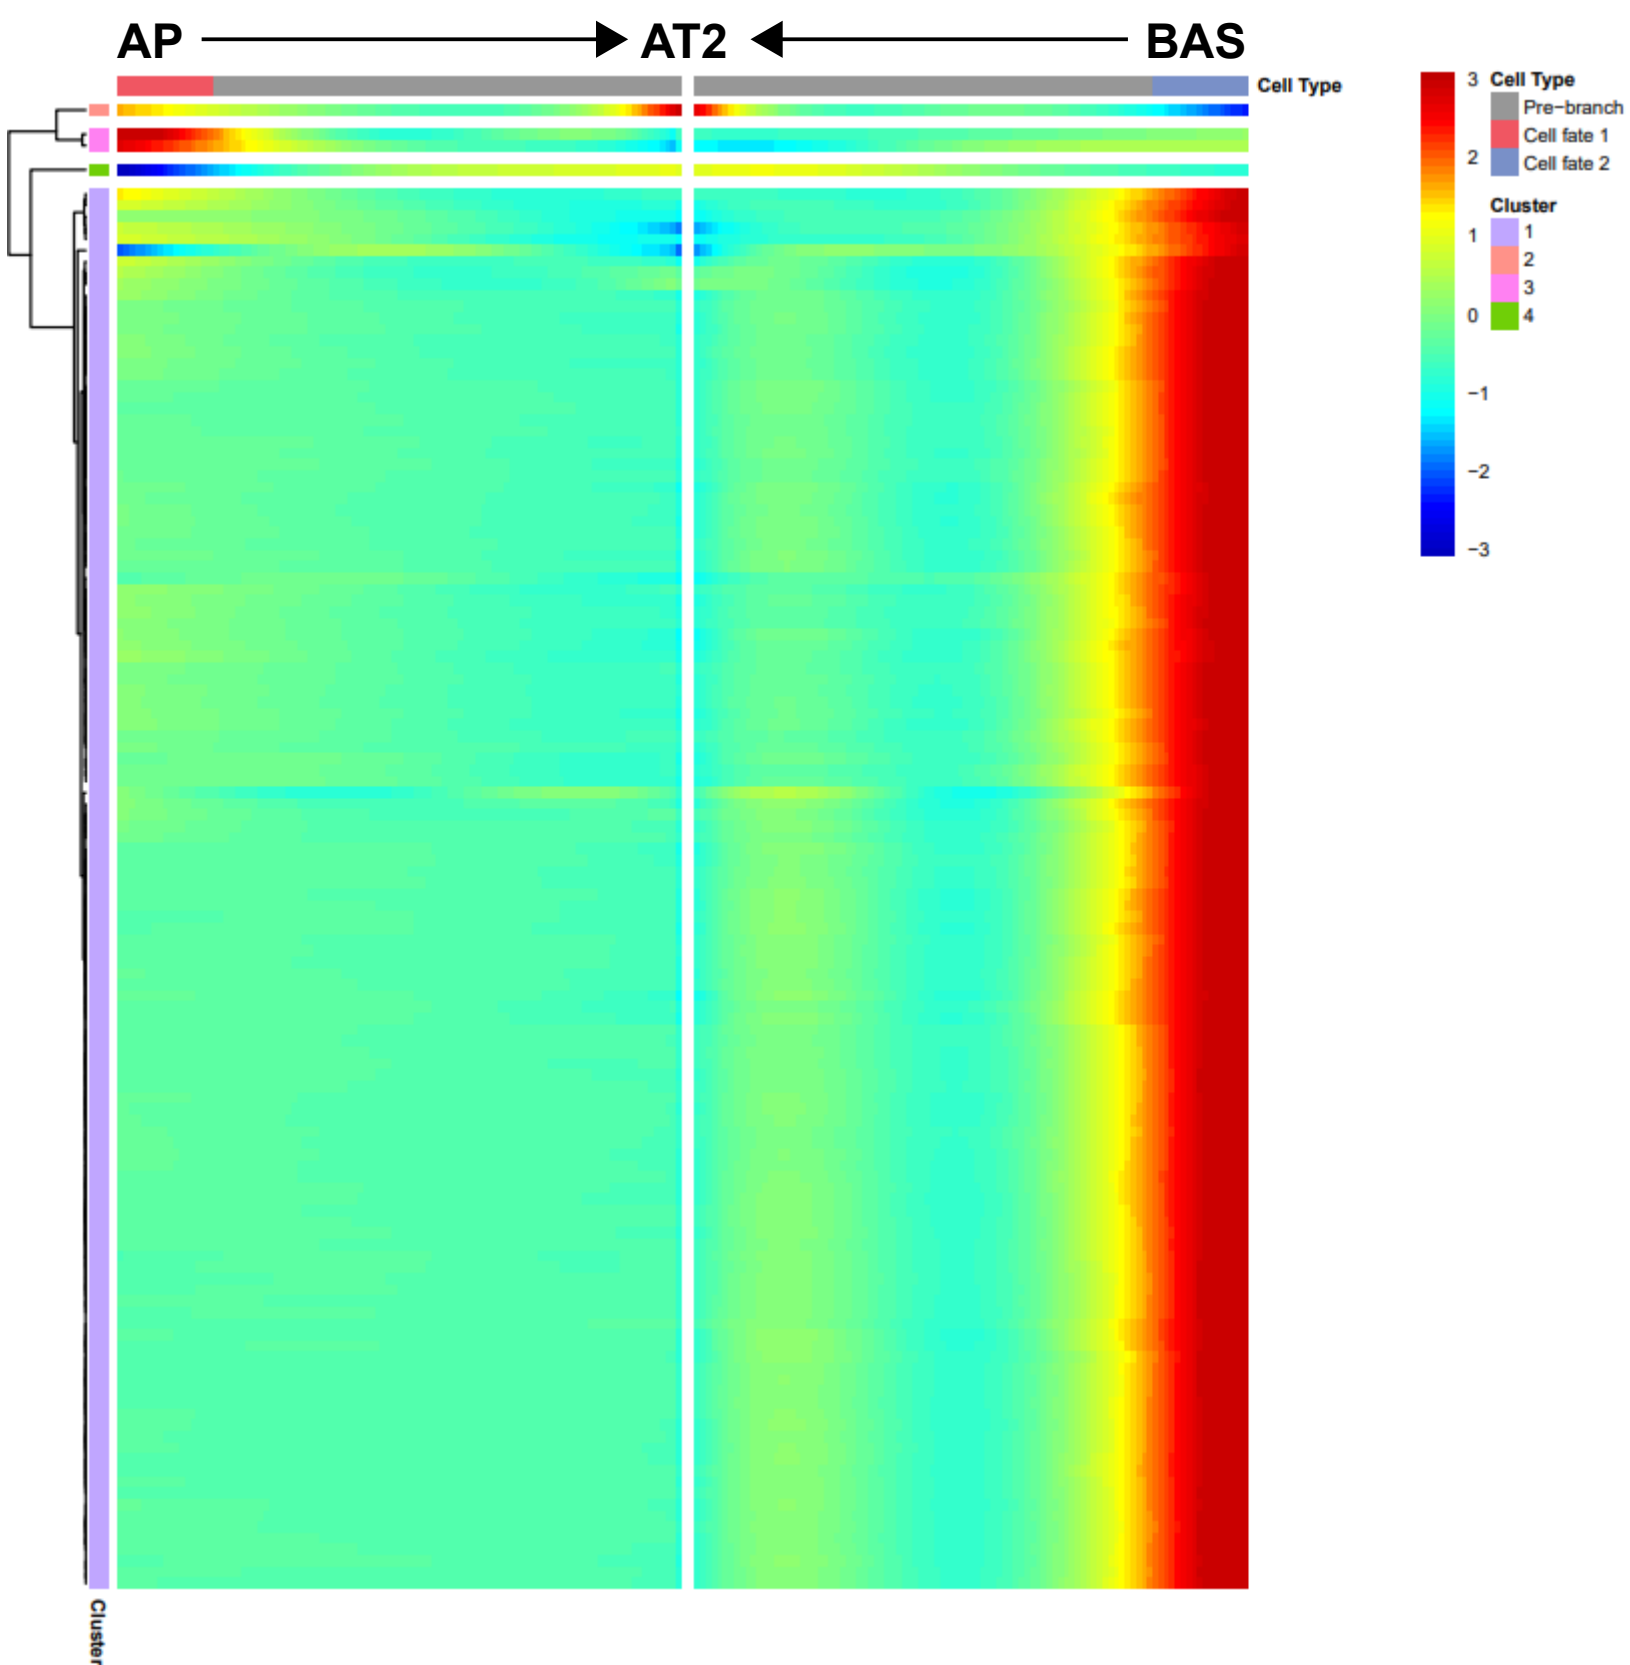**B****WT only  
(WT-Sal and WT-HDM)**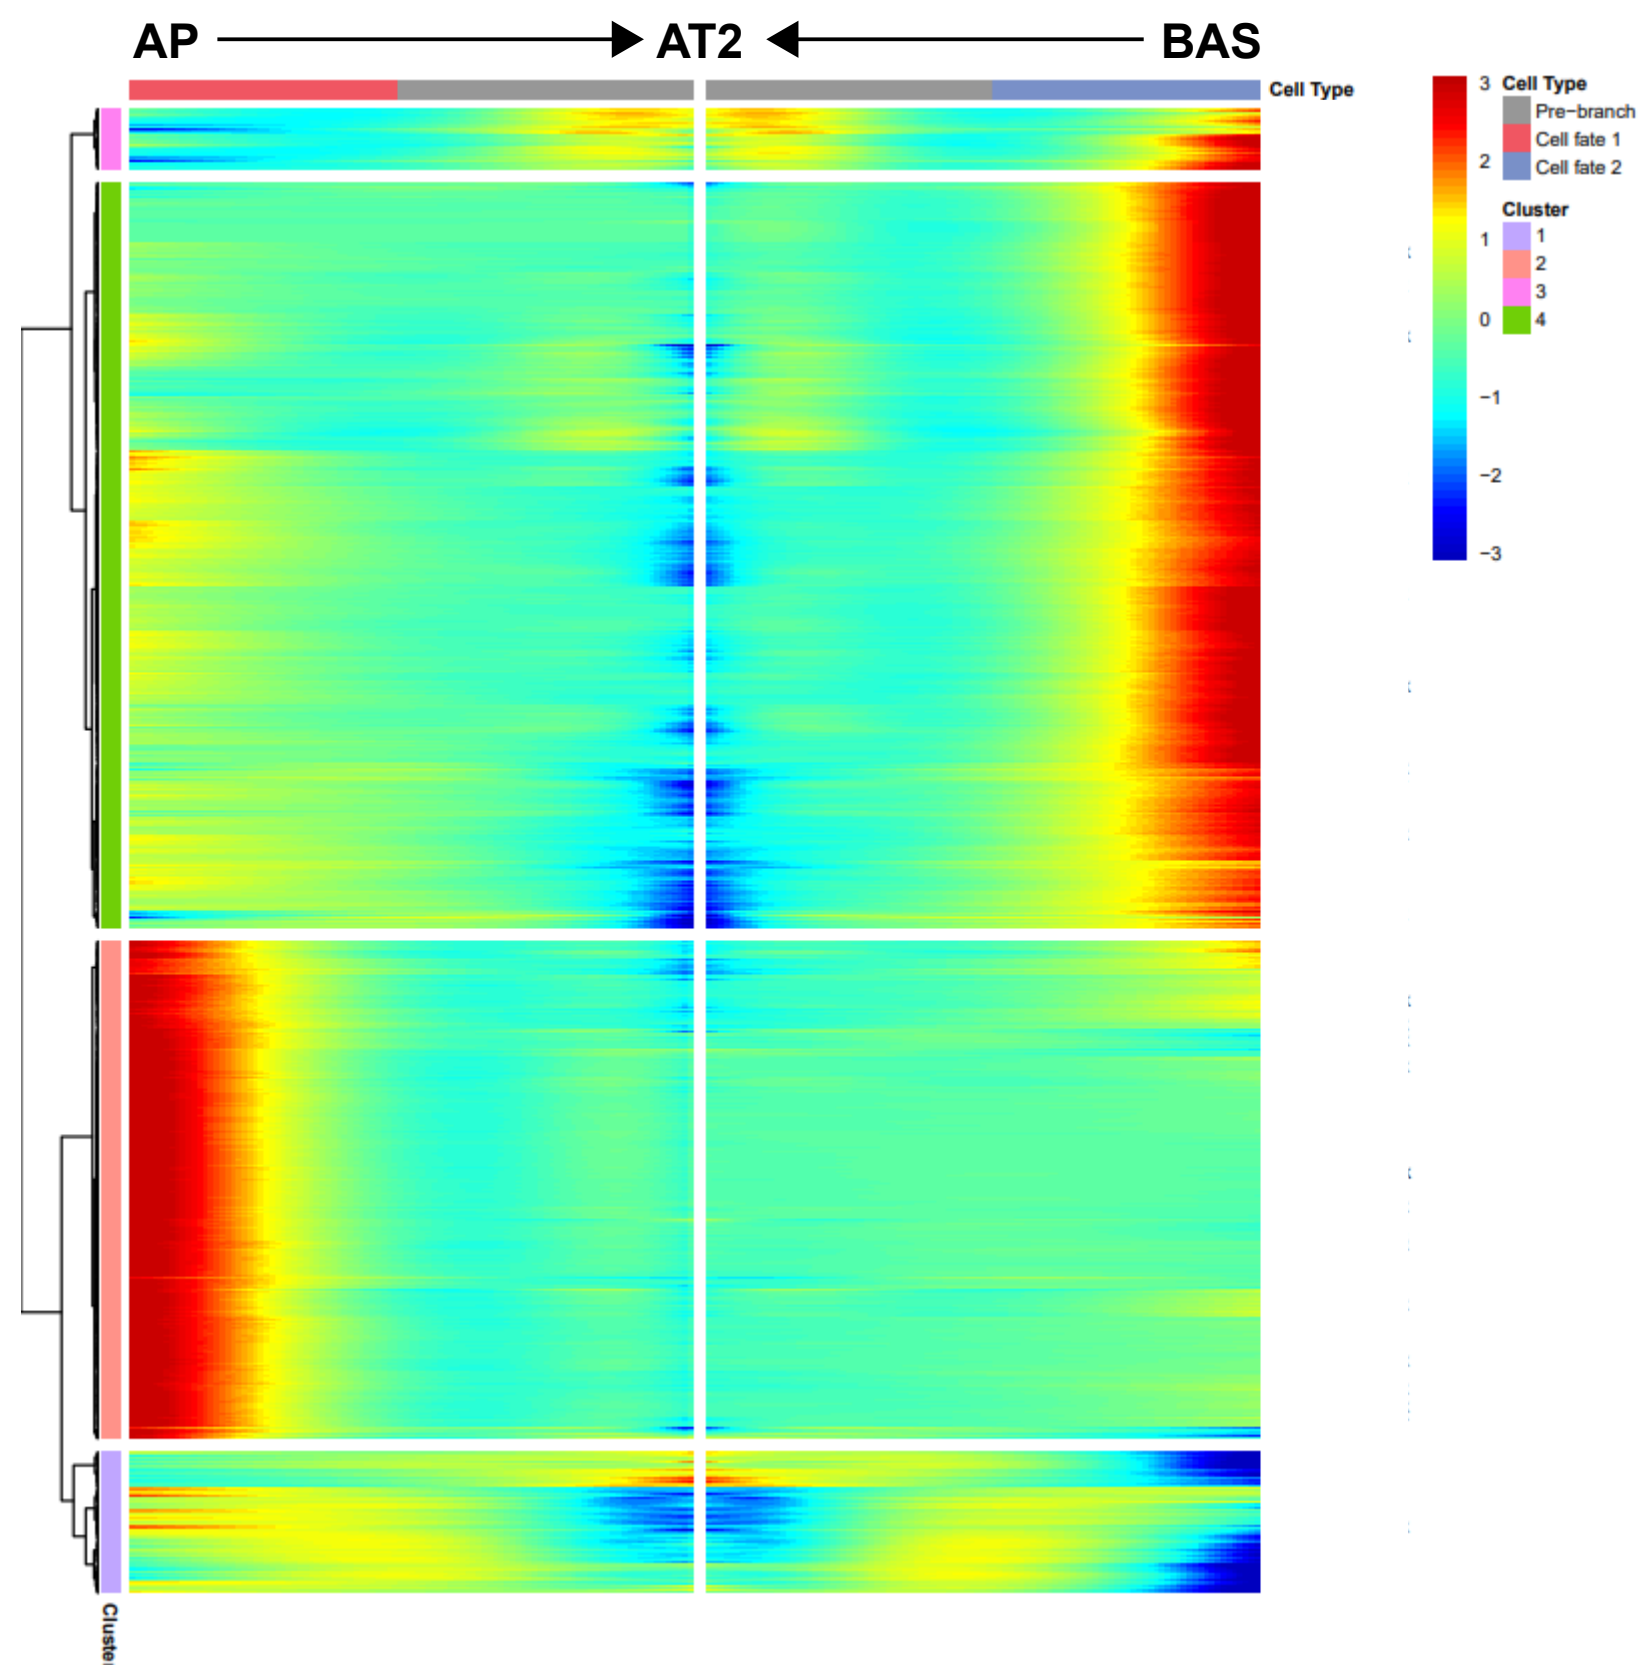**C****KO only  
(KO-Sal and KO-HDM)**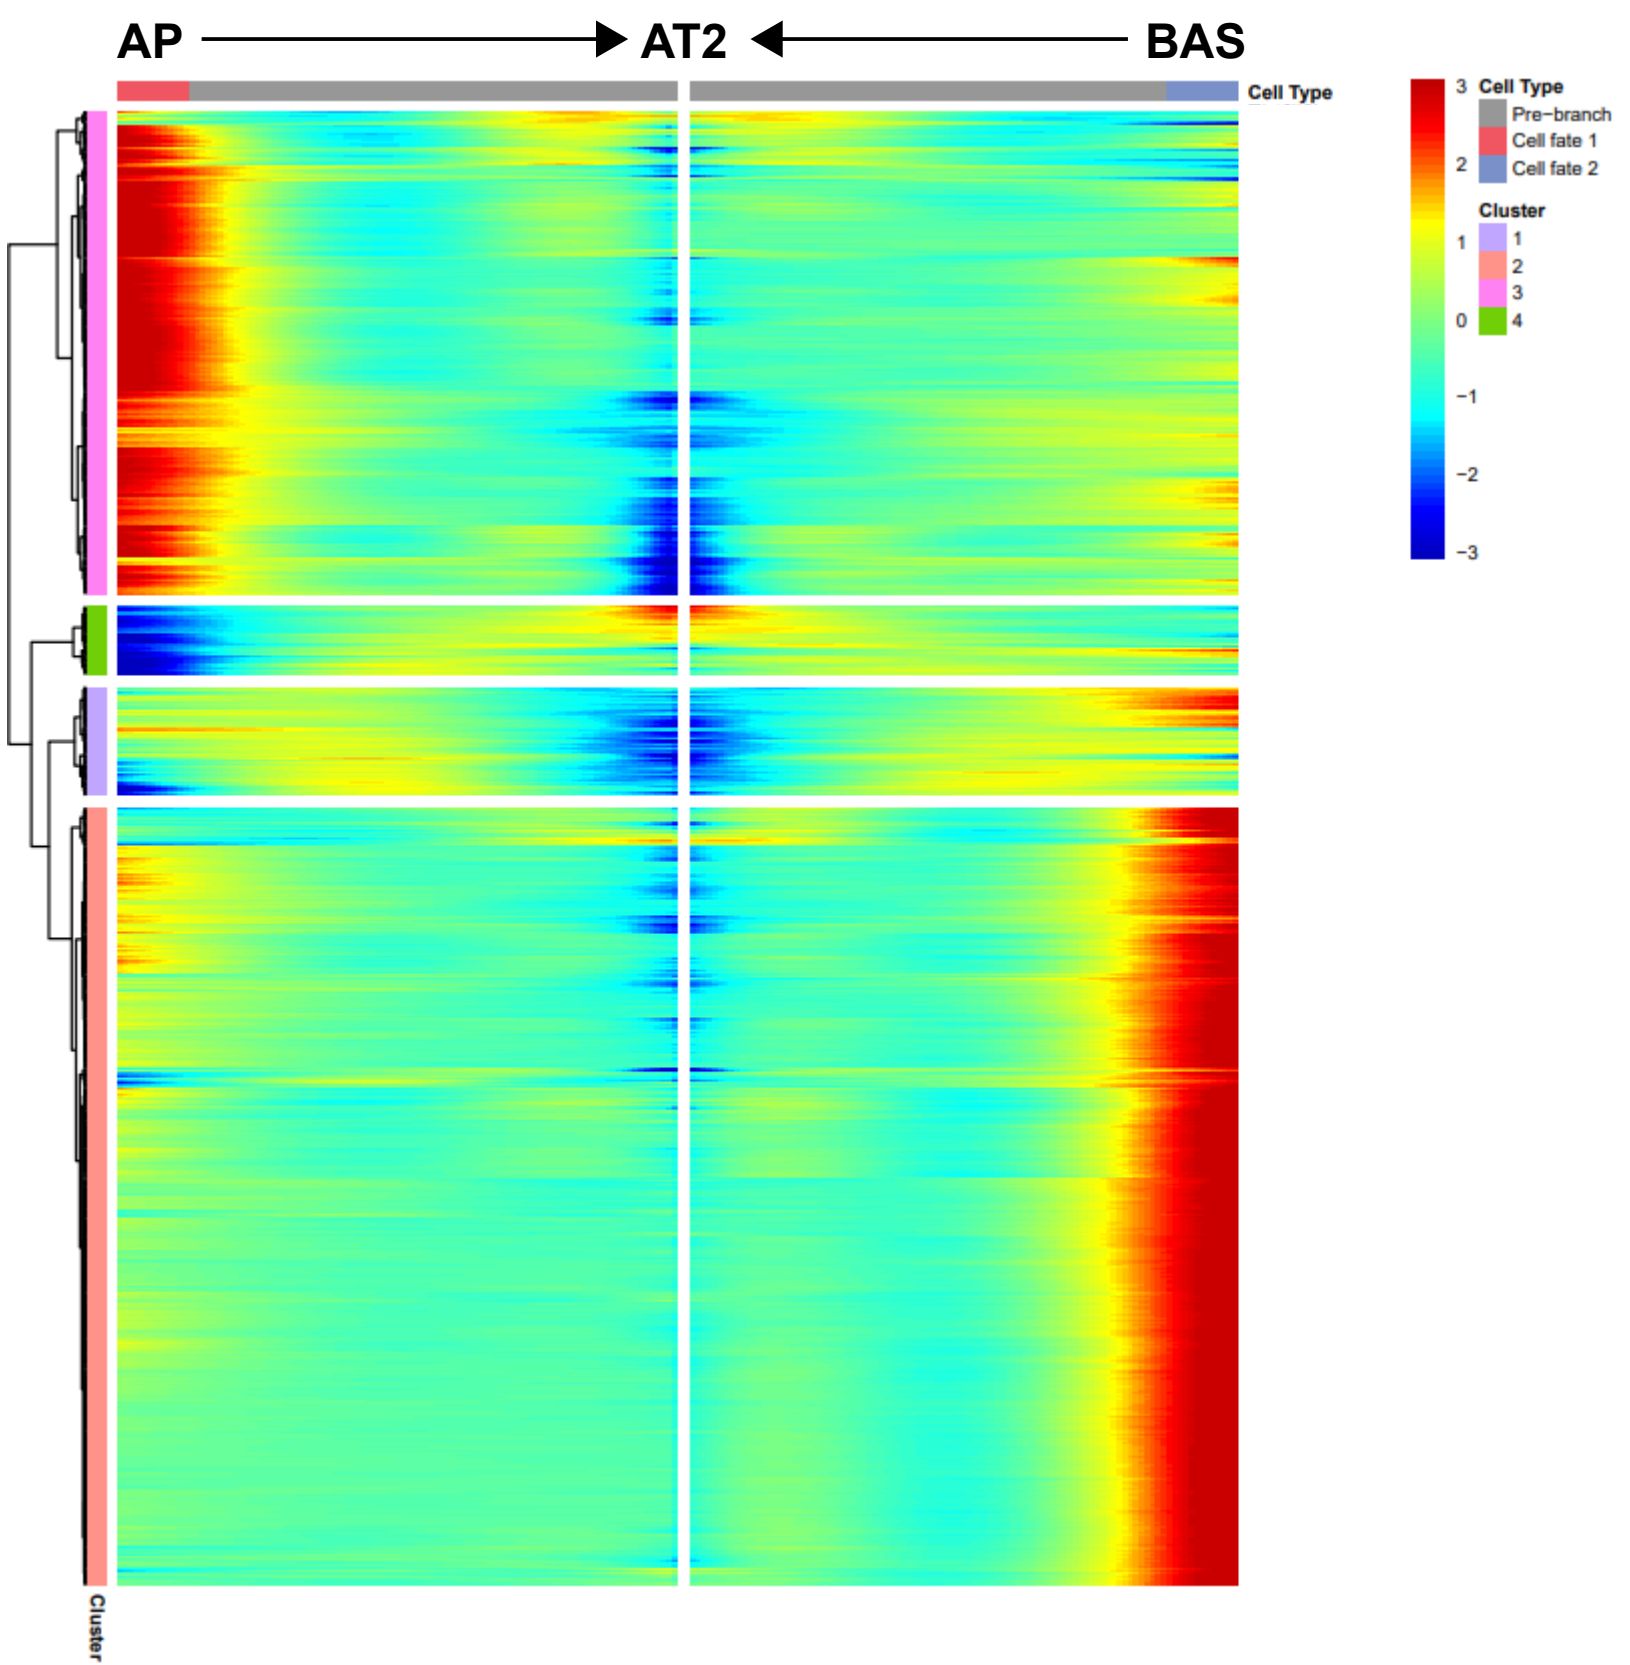**D****HDM only  
(WT-HDM and KO-HDM)**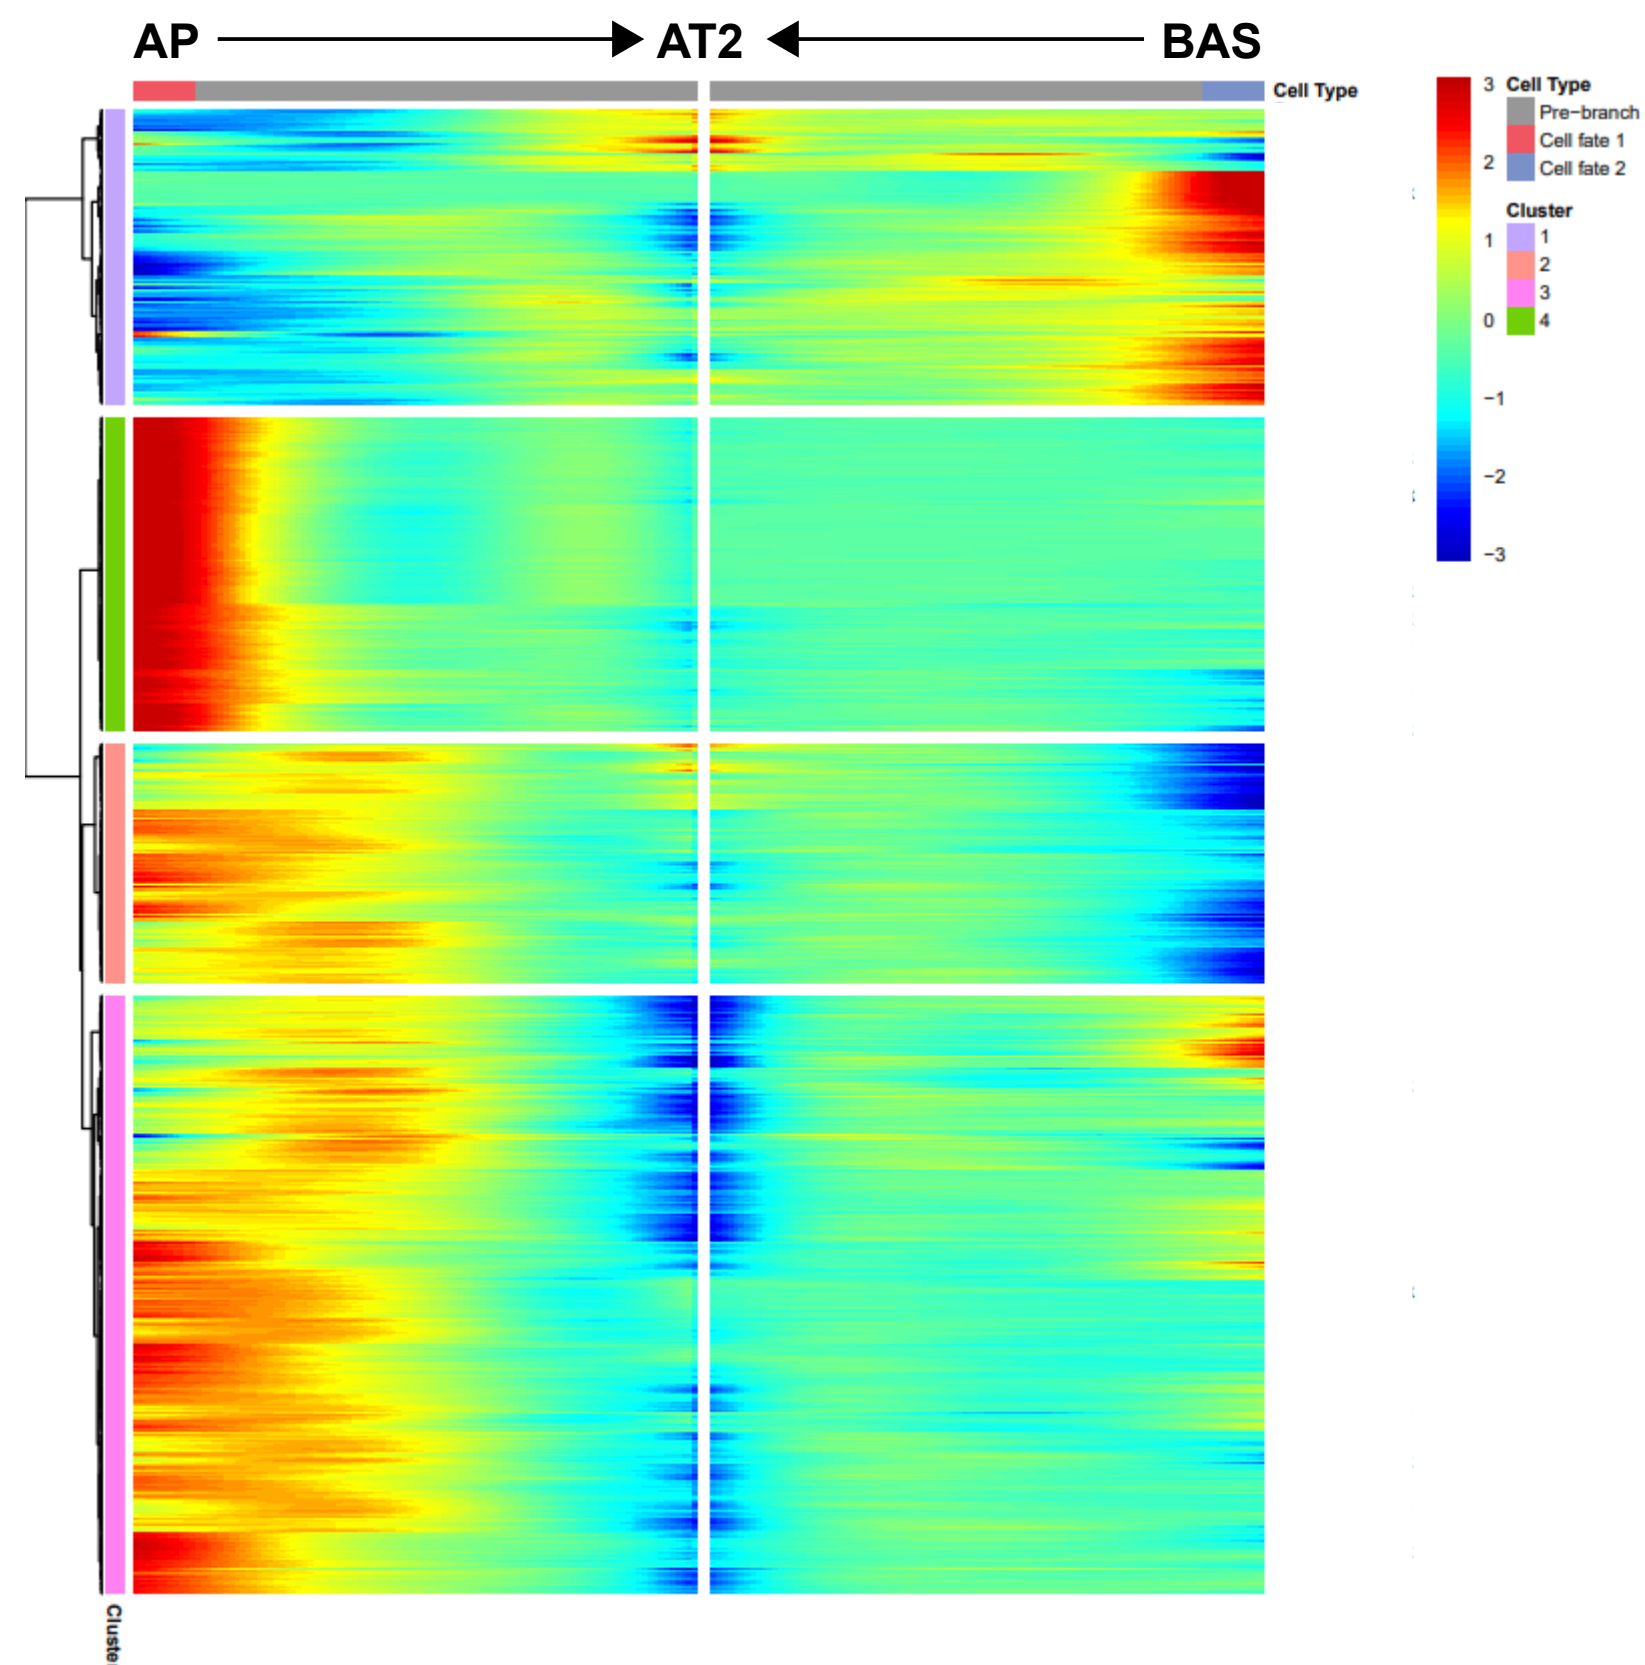

Supplement: s1 [file s1]

**Epcam, All Cells**

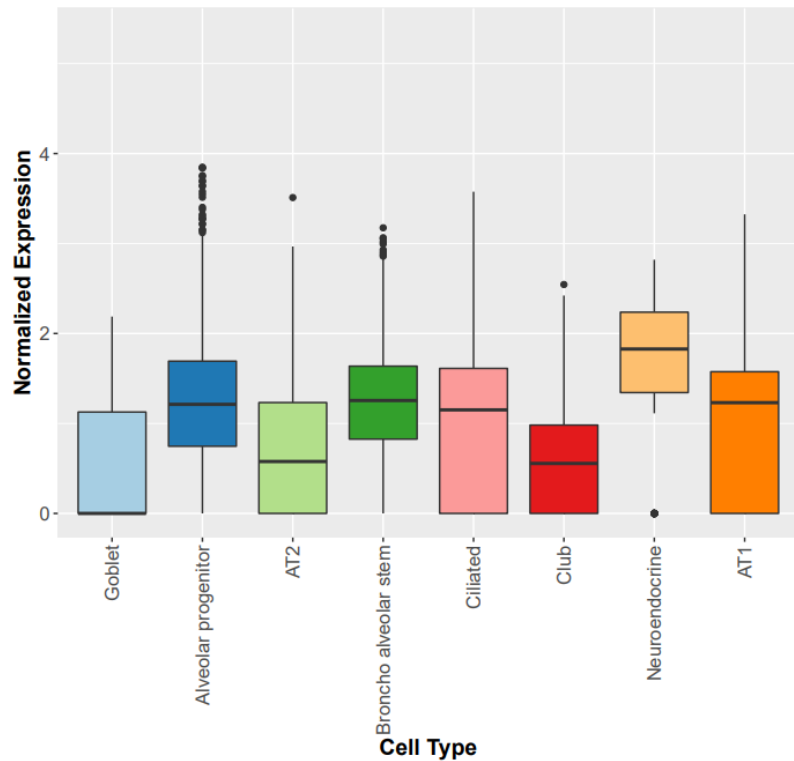

**Scgb1a1, All Cells**

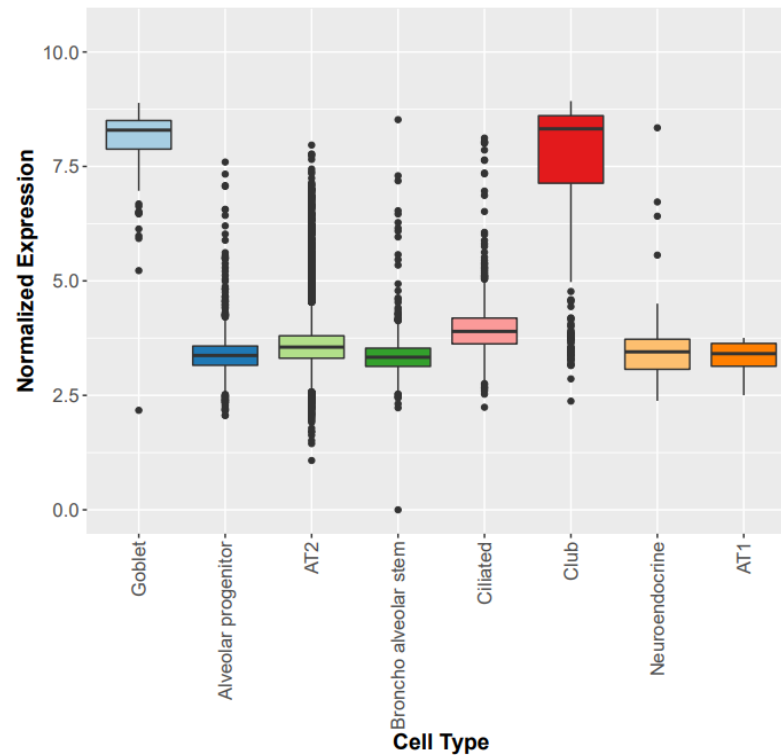

**Tet1, All Cells**

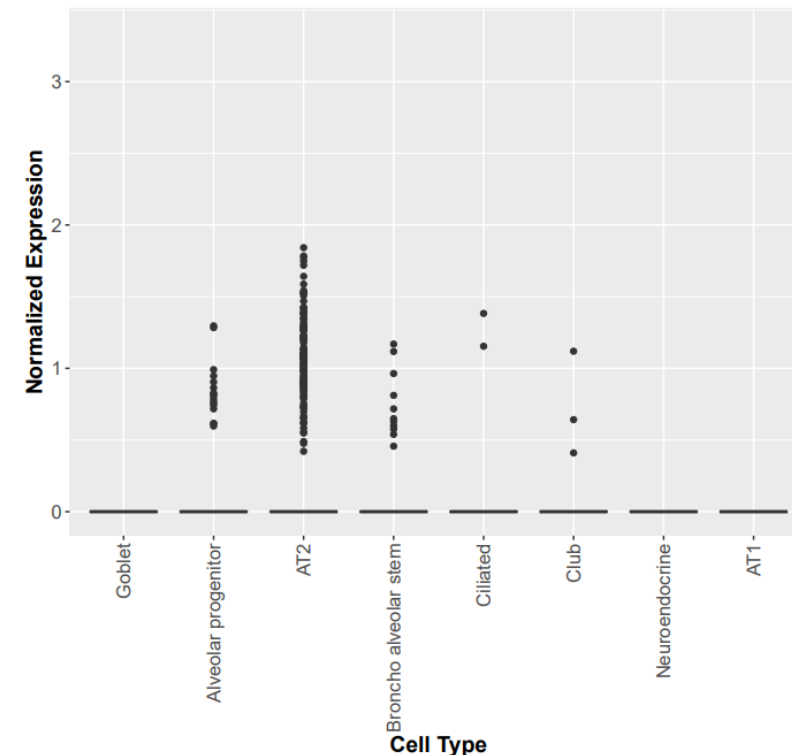

**Supplementary Figure S2**

Supplement: s1 [file s1]
